# Supplementary material
Source: publisher site journal article supplement (https://www.spandidos-publications.com/3871/downloadSupplementary)
Supplement: Supplementary file 1 [file downloadSupplementary]

## Sheet: Protein_quant
Table SI. Raw data of all the quantifiable proteins identified by mass spectrometry analysis.
Protein information				Non-VUR					VUR					VUR/Non-VUR
Protein accession	Protein description	Gene name	MW (kDa)	Non-VUR1	Non-VUR2	Non-VUR3	Non-VUR4	Non-VUR5	VUR1	VUR3	VUR2	VUR4	VUR5	Ratio	P-value
P02656	Apolipoprotein C-III OS=Homo sapiens OX=9606 GN=APOC3 PE=1 SV=1	APOC3	10.852	0.371	0.911	0.912	0.612	1.584		0.191	2.438	0.984	1.245	1.383	0.85854
O95741	Copine-6 OS=Homo sapiens OX=9606 GN=CPNE6 PE=1 SV=3	CPNE6	61.99	1.295	0.758	0.686			0.394	0.822	1.154			0.865	0.62708
O00214	Galectin-8 OS=Homo sapiens OX=9606 GN=LGALS8 PE=1 SV=4	LGALS8	35.808	0.582	1.235	0.766			0.676	1.564	1.144			1.31	0.46984
Q8WW62	Transmembrane emp24 domain-containing protein 6 OS=Homo sapiens OX=9606 GN=TMED6 PE=2 SV=2	TMED6	27.631				0.491	1.067				0.382	3.413	2.436	0.73262
Q15631	Translin OS=Homo sapiens OX=9606 GN=TSN PE=1 SV=1	TSN	26.183	1.116	0.85	1.307			1.974	1.14	0.964			1.246	0.4976
Q16706	Alpha-mannosidase 2 OS=Homo sapiens OX=9606 GN=MAN2A1 PE=1 SV=2	MAN2A1	131.14	0.77	0.578	0.352			0.324	0.855	4.642			3.424	0.43558
Q9H7P6	Multivesicular body subunit 12B OS=Homo sapiens OX=9606 GN=MVB12B PE=1 SV=2	MVB12B	35.619	0.413	0.364	0.469			0.807	1.017	0.464			1.836	0.082596
P01594	Immunoglobulin kappa variable 1-33 OS=Homo sapiens OX=9606 GN=IGKV1-33 PE=1 SV=2	IGKV1-33	12.848	0.369	0.303	0.633			0.858	0.303	0.823			1.52	0.41434
O95164	Ubiquitin-like protein 3 OS=Homo sapiens OX=9606 GN=UBL3 PE=1 SV=1	UBL3	13.157	1.385	1.034	0.886	1.155	1.633	1.01	1.273	1.28	0.968	1.081	0.921	0.60456
P0DOX5	Immunoglobulin gamma-1 heavy chain OS=Homo sapiens OX=9606 PE=1 SV=2	---	49.328	0.68	1.333	0.5	0.129	0.096	4.109	0.588	0.603	0.043	0.048	1.969	0.9036
A0A0A0MRZ8	Immunoglobulin kappa variable 3D-11 OS=Homo sapiens OX=9606 GN=IGKV3D-11 PE=3 SV=6	IGKV3D-11	12.625	0.357	0.18	1.055	0.616	1.189	3.572	0.755	2.339	0.794	0.675	2.395	0.123118
P54710	Sodium/potassium-transporting ATPase subunit gamma OS=Homo sapiens OX=9606 GN=FXYD2 PE=1 SV=3	FXYD2	7.2832	1.187	0.876	0.795	2.01	0.696	0.635	3.309	0.528	0.968	0.417	1.053	0.6575
P80723	Brain acid soluble protein 1 OS=Homo sapiens OX=9606 GN=BASP1 PE=1 SV=2	BASP1	22.693	2.123	11.251	2.378	2.395	2.162	2.141	0.615	0.591	0.505	0.401	0.209	0.0085214
Q86VP6	Cullin-associated NEDD8-dissociated protein 1 OS=Homo sapiens OX=9606 GN=CAND1 PE=1 SV=2	CAND1	136.37	0.909	1.523	1.201	1.044	1.238	0.775	1.214	1.291	0.921	1.179	0.91	0.47312
Q3SXY8	ADP-ribosylation factor-like protein 13B OS=Homo sapiens OX=9606 GN=ARL13B PE=1 SV=1	ARL13B	48.643	1.038	1.028	1.143	0.714	0.995	0.687	0.966	1.536	1.107	1.224	1.122	0.56628
O43865	S-adenosylhomocysteine hydrolase-like protein 1 OS=Homo sapiens OX=9606 GN=AHCYL1 PE=1 SV=2	AHCYL1	58.951	1.537	0.874	1.38	0.774	0.83	1.614	0.722	0.999	0.844	0.751	0.914	0.65062
Q8N4P2	Tetratricopeptide repeat protein 30B OS=Homo sapiens OX=9606 GN=TTC30B PE=1 SV=2	TTC30B	76.098	1.535	1.402	1.325			0.724	0.906	0.679			0.542	0.0031397
P21980	Protein-glutamine gamma-glutamyltransferase 2 OS=Homo sapiens OX=9606 GN=TGM2 PE=1 SV=2	TGM2	77.328	0.922	4.247	0.714	0.428	0.606	1.14	2.002	0.52	0.941	0.698	0.766	0.97564
O43657	Tetraspanin-6 OS=Homo sapiens OX=9606 GN=TSPAN6 PE=1 SV=1	TSPAN6	27.563	0.583	3.708	0.478	0.759	0.498	0.906	1.633	1.049	1.334	1.42	1.052	0.36756
Q9UQN3	Charged multivesicular body protein 2b OS=Homo sapiens OX=9606 GN=CHMP2B PE=1 SV=1	CHMP2B	23.906	0.575	0.843	2.123	1.212	2.153	1.224	0.487	0.45	0.915	0.559	0.526	0.102705
P07741	Adenine phosphoribosyltransferase OS=Homo sapiens OX=9606 GN=APRT PE=1 SV=2	APRT	19.608	3.095	1.257	2.424			0.612	0.504	0.358			0.218	0.0088989
P20929	Nebulin OS=Homo sapiens OX=9606 GN=NEB PE=1 SV=5	NEB	772.91	0.278	0.583	0.397				0.91	0.163			1.279	0.95826
Q9H3S7	Tyrosine-protein phosphatase non-receptor type 23 OS=Homo sapiens OX=9606 GN=PTPN23 PE=1 SV=1	PTPN23	178.97	1.158	0.757	0.809	0.73	0.786	0.806	1.111	0.854	1.075	1.567	1.277	0.148658
O14807	Ras-related protein M-Ras OS=Homo sapiens OX=9606 GN=MRAS PE=1 SV=2	MRAS	23.846	0.928	0.498	2.181			0.405	0.79	0.502			0.47	0.2637
P50990	T-complex protein 1 subunit theta OS=Homo sapiens OX=9606 GN=CCT8 PE=1 SV=4	CCT8	59.62	1.166	2.567	1.257	0.866	1.404	0.787	0.901	1.256	1.032	1.544	0.76	0.3077
P29992	Guanine nucleotide-binding protein subunit alpha-11 OS=Homo sapiens OX=9606 GN=GNA11 PE=1 SV=2	GNA11	42.123	1.066	0.789	1.566	1.245	2.093	0.849	1.069	0.878	1.148	1.168	0.756	0.2287
P11117	Lysosomal acid phosphatase OS=Homo sapiens OX=9606 GN=ACP2 PE=1 SV=3	ACP2	48.344	0.87	0.594	1.14	0.869	0.837	0.681	0.577	0.976	2.354	1.145	1.33	0.52682
O75264	Small integral membrane protein 24 OS=Homo sapiens OX=9606 GN=SMIM24 PE=2 SV=2	SMIM24	14.964	0.753	0.74	1.338	0.645	1.172	0.684	2.34	1.106	0.93	1.626	1.438	0.26182
O76041	Nebulette OS=Homo sapiens OX=9606 GN=NEBL PE=1 SV=1	NEBL	116.45				1.01	2.639				0.821	0.895	0.47	0.31322
P49327	Fatty acid synthase OS=Homo sapiens OX=9606 GN=FASN PE=1 SV=3	FASN	273.42	1.793	1.855	0.929	0.874	0.985	1.188	1.499	1.704	1.405	0.613	0.996	0.98888
P16870	Carboxypeptidase E OS=Homo sapiens OX=9606 GN=CPE PE=1 SV=1	CPE	53.15	1.788	1.3	1.346			1.077	0.835	0.401			0.522	0.082784
Q9UNA1	Rho GTPase-activating protein 26 OS=Homo sapiens OX=9606 GN=ARHGAP26 PE=1 SV=1	ARHGAP26	92.234				0.792	1.605				0.273	4.066	1.81	0.96568
P08123	Collagen alpha-2(I) chain OS=Homo sapiens OX=9606 GN=COL1A2 PE=1 SV=7	COL1A2	129.31	1.871	4.141	1.781			1.404	0.701	1.219			0.427	0.078217
P18084	Integrin beta-5 OS=Homo sapiens OX=9606 GN=ITGB5 PE=1 SV=1	ITGB5	88.053	0.223	0.443	0.216			2.884	0.188	0.426			3.966	0.39926
Q07812	Apoptosis regulator BAX OS=Homo sapiens OX=9606 GN=BAX PE=1 SV=1	BAX	21.184	1.717	4.212	1.132	0.93	0.992	0.981	1.011	0.847	1.175	0.805	0.536	0.192339
P12273	Prolactin-inducible protein OS=Homo sapiens OX=9606 GN=PIP PE=1 SV=1	PIP	16.572	0.573	1.391	0.464	0.737	0.559	0.345	0.685	0.423	3.717	0.684	1.572	0.8297
Q16181	Septin-7 OS=Homo sapiens OX=9606 GN=SEPTIN7 PE=1 SV=2	SEPTIN7	50.679	1.556	2.305	1.864	1.537	2.248	1.725	0.373	0.255	0.647	0.642	0.383	0.025139
Q8WWI5	Choline transporter-like protein 1 OS=Homo sapiens OX=9606 GN=SLC44A1 PE=1 SV=1	SLC44A1	73.301				3.247	0.732				1.474	1.493	0.746	0.96712
Q8IV36	Protein HID1 OS=Homo sapiens OX=9606 GN=HID1 PE=1 SV=1	HID1	88.743	1.211	3.513	5.965			0.748	1.41	0.615			0.259	0.082985
P01876	Immunoglobulin heavy constant alpha 1 OS=Homo sapiens OX=9606 GN=IGHA1 PE=1 SV=2	IGHA1	37.654	0.225	0.453	0.782	0.491	2.018	3.573	0.966	1.326	1.069	0.619	1.903	0.154962
Q96J84	Kin of IRRE-like protein 1 OS=Homo sapiens OX=9606 GN=KIRREL1 PE=1 SV=2	KIRREL1	83.535	0.61	0.989	0.437	0.502	0.807	0.4	1.664	1.163	1.186	0.919	1.594	0.182296
P61018	Ras-related protein Rab-4B OS=Homo sapiens OX=9606 GN=RAB4B PE=1 SV=1	RAB4B	23.586				1.517	0.547				0.953	0.769	0.834	0.91602
O00764	Pyridoxal kinase OS=Homo sapiens OX=9606 GN=PDXK PE=1 SV=1	PDXK	35.102	0.962	1.161	0.987	1.434	0.862	0.95	0.695	0.935	0.739	0.86	0.773	0.050878
Q8N6R0	eEF1A lysine and N-terminal methyltransferase OS=Homo sapiens OX=9606 GN=EEF1AKNMT PE=1 SV=1	EEF1AKNMT	78.767					0.139					6.515	46.871
P35241	Radixin OS=Homo sapiens OX=9606 GN=RDX PE=1 SV=1	RDX	68.563	0.98	0.883	1.119	1.193	1.806	1.366	1.021	1.13	1.172	0.741	0.908	0.61148
Q9Y3R5	Protein dopey-2 OS=Homo sapiens OX=9606 GN=DOP1B PE=1 SV=5	DOP1B	258.23	0.866	3.862	0.861	2.023	0.772	1.118	2.213	0.875	1.418	0.331	0.71	0.5239
P09917	Arachidonate 5-lipoxygenase OS=Homo sapiens OX=9606 GN=ALOX5 PE=1 SV=2	ALOX5	77.982				1.746	0.876				1.375	1.53	1.108	0.69266
P00441	Superoxide dismutase [Cu-Zn] OS=Homo sapiens OX=9606 GN=SOD1 PE=1 SV=2	SOD1	15.936	1.877	2	1.437	0.457	0.433	0.882	1.192	0.79	1.36	1.531	0.928	0.79726
Q8N7Q2	Putative uncharacterized protein CELF2-AS1 OS=Homo sapiens OX=9606 GN=CELF2-AS1 PE=5 SV=2	CELF2-AS1	20.47	2.299	0.957	0.903			2.277	0.352	0.265			0.696	0.37044
Q9C0H2	Protein tweety homolog 3 OS=Homo sapiens OX=9606 GN=TTYH3 PE=1 SV=3	TTYH3	57.544	1.686	0.91	1.343	0.798	1.252	1.535	0.975	0.748	0.966	1.014	0.875	0.49936
P51148	Ras-related protein Rab-5C OS=Homo sapiens OX=9606 GN=RAB5C PE=1 SV=2	RAB5C	23.482	1.222	1.145	0.96	1.219	0.956	0.769	1.512	1.033	0.81	0.939	0.92	0.43846
P01714	Immunoglobulin lambda variable 3-19 OS=Homo sapiens OX=9606 GN=IGLV3-19 PE=1 SV=2	IGLV3-19	12.042	1.603	2.164	0.94	1.427	0.705	5.256	0.62	1.866	1.522	0.379	1.41	0.97922
Q9Y328	Neuronal vesicle trafficking-associated protein 2 OS=Homo sapiens OX=9606 GN=NSG2 PE=2 SV=1	NSG2	19.085	0.7	8.909	0.509			2.453	0.545	0.62			0.358	0.68508
Q9UIC8	Leucine carboxyl methyltransferase 1 OS=Homo sapiens OX=9606 GN=LCMT1 PE=1 SV=2	LCMT1	38.379	1.504	4.27	0.972			0.74	1.264	0.931			0.435	0.23134
P17174	"Aspartate aminotransferase, cytoplasmic OS=Homo sapiens OX=9606 GN=GOT1 PE=1 SV=3"	GOT1	46.247	1.613	1.39	1.02	0.632	2.055	0.522	0.988	0.822	0.652	0.691	0.548	0.044458
Q8NHP1	Aflatoxin B1 aldehyde reductase member 4 OS=Homo sapiens OX=9606 GN=AKR7L PE=2 SV=7	AKR7L	36.97				2.609	0.701				0.334	2.041	0.718	0.70218
Q9UNM6	26S proteasome non-ATPase regulatory subunit 13 OS=Homo sapiens OX=9606 GN=PSMD13 PE=1 SV=2	PSMD13	42.945	0.856	0.505	0.568	0.601	0.345	0.681	0.823	1.549	0.81	1.257	1.781	0.027458
O15455	Toll-like receptor 3 OS=Homo sapiens OX=9606 GN=TLR3 PE=1 SV=1	TLR3	103.83	0.815	1.095	0.776	0.508	0.652	0.611	1.194	0.717	1.102	1.413	1.31	0.2481
Q99832	T-complex protein 1 subunit eta OS=Homo sapiens OX=9606 GN=CCT7 PE=1 SV=2	CCT7	59.366	0.839	0.892	0.915	1.047	0.984	1.28	1.063	1.665	1.136	1.27	1.371	0.0072584
O75355	Ectonucleoside triphosphate diphosphohydrolase 3 OS=Homo sapiens OX=9606 GN=ENTPD3 PE=1 SV=2	ENTPD3	59.105	0.623	0.655	2.342	1.86	3.64	1.48	0.897	0.984	1.112	1.248	0.627	0.52224
Q14210	Lymphocyte antigen 6D OS=Homo sapiens OX=9606 GN=LY6D PE=1 SV=1	LY6D	13.286	0.368	0.303	0.51	1.805	1.479	0.86	0.623	1.689	0.289	1.789	1.176	0.66308
Q7Z4S6	Kinesin-like protein KIF21A OS=Homo sapiens OX=9606 GN=KIF21A PE=1 SV=2	KIF21A	187.18				0.838	0.889				0.864	1.08	1.126	0.4322
P02452	Collagen alpha-1(I) chain OS=Homo sapiens OX=9606 GN=COL1A1 PE=1 SV=5	COL1A1	138.94	0.463	0.412	0.442	0.44	0.396	2.43	3.534	2.238	2.409	1.535	5.641	0.00023705
Q99460	26S proteasome non-ATPase regulatory subunit 1 OS=Homo sapiens OX=9606 GN=PSMD1 PE=1 SV=2	PSMD1	105.84	1.258	0.99	0.801			0.722	1.149	1.94			1.25	0.63824
Q8NHW5	60S acidic ribosomal protein P0-like OS=Homo sapiens OX=9606 GN=RPLP0P6 PE=5 SV=1	RPLP0P6	34.364				0.334	0.307				0.512	0.629	1.78	0.035745
A0A0C4DH31	Immunoglobulin heavy variable 1-18 OS=Homo sapiens OX=9606 GN=IGHV1-18 PE=3 SV=1	IGHV1-18	12.82	0.372	0.571	1.286	0.807	2.382	4.884	1.026	2.411	0.795	1.291	1.921	0.20552
Q8N392	Rho GTPase-activating protein 18 OS=Homo sapiens OX=9606 GN=ARHGAP18 PE=1 SV=3	ARHGAP18	74.976	0.933	1.012	0.972	0.621	0.881	1.118	0.869	1.184	0.761	0.833	1.078	0.56086
Q14409	Glycerol kinase 3 OS=Homo sapiens OX=9606 GN=GK3P PE=2 SV=2	GK3P	60.597	0.821	0.854	0.844	0.753	0.953	0.907	1.458	1.086	0.927	1.286	1.341	0.023202
A6ND91	Putative L-aspartate dehydrogenase OS=Homo sapiens OX=9606 GN=ASPDH PE=1 SV=2	ASPDH	29.946	0.578	0.177	0.205			0.312		5.58			9.206	0.27574
Q9Y2E4	Disco-interacting protein 2 homolog C OS=Homo sapiens OX=9606 GN=DIP2C PE=1 SV=2	DIP2C	170.77	1.391	0.865	1.168	0.824	0.862	1.263	1.464	0.841	1.187	1.099	1.146	0.3346
Q96AM1	Mas-related G-protein coupled receptor member F OS=Homo sapiens OX=9606 GN=MRGPRF PE=2 SV=1	MRGPRF	38.171	0.855	0.901	0.47	1.615	0.652	0.761	2.016	1.813	1.184	1.801	1.686	0.079418
O95837	Guanine nucleotide-binding protein subunit alpha-14 OS=Homo sapiens OX=9606 GN=GNA14 PE=1 SV=1	GNA14	41.57	0.869	1.305	1.952	1.17	4.05	1.181	0.978	1.153	0.645	0.477	0.474	0.076999
P55017	Solute carrier family 12 member 3 OS=Homo sapiens OX=9606 GN=SLC12A3 PE=1 SV=3	SLC12A3	113.14	1.129	0.785	1.62	0.91	0.441	0.477	1.062	1.022	1.186	0.511	0.872	0.68662
Q969X0	RILP-like protein 2 OS=Homo sapiens OX=9606 GN=RILPL2 PE=1 SV=1	RILPL2	23.986	1.367	1.556	1.87			0.925	1.025	0.723			0.558	0.0131221
Q9H3K2	Growth hormone-inducible transmembrane protein OS=Homo sapiens OX=9606 GN=GHITM PE=1 SV=2	GHITM	37.205	1.114	1.192	1.013			1.241	1.075	0.525			0.856	0.46592
Q12929	Epidermal growth factor receptor kinase substrate 8 OS=Homo sapiens OX=9606 GN=EPS8 PE=1 SV=1	EPS8	91.88	0.942	0.973	2.009	1.259	1.928	1.144	0.678	1.051	0.834	0.701	0.62	0.049257
P10253	Lysosomal alpha-glucosidase OS=Homo sapiens OX=9606 GN=GAA PE=1 SV=4	GAA	105.32	1.232	1.772	1.134	0.847	1.041	0.766	1.724	1.232	1.056	0.902	0.943	0.71994
P02748	Complement component C9 OS=Homo sapiens OX=9606 GN=C9 PE=1 SV=2	C9	63.173	0.561	0.552	0.324	0.504	0.312	0.585	0.437	3.727	0.794	2.875	3.736	0.094924
Q8IVF2	Protein AHNAK2 OS=Homo sapiens OX=9606 GN=AHNAK2 PE=1 SV=2	AHNAK2	616.62	0.512	0.808	0.218			0.196	2.239	1.23			2.383	0.5108
P51149	Ras-related protein Rab-7a OS=Homo sapiens OX=9606 GN=RAB7A PE=1 SV=1	RAB7A	23.489	0.742	0.933	1.943	0.801	1.003	0.821	0.63	0.636	1.118	1.146	0.802	0.40602
Q6UWP8	Suprabasin OS=Homo sapiens OX=9606 GN=SBSN PE=1 SV=2	SBSN	60.54	0.861	2.708	1.695	1.753	0.826	0.82	0.429	1.54			0.593	0.2218
O00338	Sulfotransferase 1C2 OS=Homo sapiens OX=9606 GN=SULT1C2 PE=1 SV=1	SULT1C2	34.88	1.013	0.709	0.904	0.559	0.474	0.79	1.569	1.44	0.88	0.946	1.537	0.061077
Q4KMP7	TBC1 domain family member 10B OS=Homo sapiens OX=9606 GN=TBC1D10B PE=1 SV=3	TBC1D10B	87.198	1.071	1.413	1.909	2.21	3.545	1.802	0.888	0.75	0.701	0.76	0.483	0.028537
P11413	Glucose-6-phosphate 1-dehydrogenase OS=Homo sapiens OX=9606 GN=G6PD PE=1 SV=4	G6PD	59.256				1.319	0.77				1.218	1.201	1.158	0.62086
P33241	Lymphocyte-specific protein 1 OS=Homo sapiens OX=9606 GN=LSP1 PE=1 SV=1	LSP1	37.191	0.926	2.656	1.601			4.811	0.497	0.594			1.139	0.68908
Q07020	60S ribosomal protein L18 OS=Homo sapiens OX=9606 GN=RPL18 PE=1 SV=2	RPL18	21.634	0.882	1.457	0.888			1.396	1.158	1.243			1.177	0.34156
O43813	Glutathione S-transferase LANCL1 OS=Homo sapiens OX=9606 GN=LANCL1 PE=1 SV=1	LANCL1	45.283	2.036	0.587	1.198	0.801	1.073	1.376	1.866	1.651	1.209	1.052	1.256	0.23942
P21730	C5a anaphylatoxin chemotactic receptor 1 OS=Homo sapiens OX=9606 GN=C5AR1 PE=1 SV=2	C5AR1	39.335	0.51	0.643	0.381	4.196	0.868	5.306	0.516	0.618	1.527	1.066	1.369	0.55866
P35558	"Phosphoenolpyruvate carboxykinase, cytosolic [GTP] OS=Homo sapiens OX=9606 GN=PCK1 PE=1 SV=3"	PCK1	69.194	1.162	1.28	0.913	0.7	0.56	0.776	1.584	1.507	0.617	0.751	1.134	0.7101
Q5T0N5	Formin-binding protein 1-like OS=Homo sapiens OX=9606 GN=FNBP1L PE=1 SV=3	FNBP1L	70.065	0.88	1.845	1.018	1.292	2.055	0.71	1	0.974	0.68	1.387	0.67	0.105964
P42704	"Leucine-rich PPR motif-containing protein, mitochondrial OS=Homo sapiens OX=9606 GN=LRPPRC PE=1 SV=3"	LRPPRC	157.9				0.089	0.167				0.285	2.721	11.742	0.23342
Q9UKU9	Angiopoietin-related protein 2 OS=Homo sapiens OX=9606 GN=ANGPTL2 PE=1 SV=1	ANGPTL2	57.104	1.015	0.689	0.79			0.913	1.291	2.535			1.9	0.154096
Q63HM2	Pecanex-like protein 4 OS=Homo sapiens OX=9606 GN=PCNX4 PE=1 SV=4	PCNX4	132.7				0.823	0.957				1.781	0.751	1.422	0.60716
O43895	Xaa-Pro aminopeptidase 2 OS=Homo sapiens OX=9606 GN=XPNPEP2 PE=1 SV=3	XPNPEP2	75.624	1.016	0.796	1.255	0.639	1	0.548	0.422	1.302	0.75	2.232	1.116	0.87952
P02765	Alpha-2-HS-glycoprotein OS=Homo sapiens OX=9606 GN=AHSG PE=1 SV=2	AHSG	39.34	0.627	0.643	0.389	2.05	0.418	0.224	0.951	1.998	1.657	1.113	1.44	0.4895
Q9Y5P6	Mannose-1-phosphate guanyltransferase beta OS=Homo sapiens OX=9606 GN=GMPPB PE=1 SV=2	GMPPB	39.834	0.9	1.078	1.099	0.959	1.412	1.142	1.281	2.02	0.934	1.119	1.192	0.34322
P98196	Probable phospholipid-transporting ATPase IH OS=Homo sapiens OX=9606 GN=ATP11A PE=1 SV=3	ATP11A	129.75	0.398	0.824	0.481	0.981	0.731	1.236	1.898	0.683	1.295	1.261	1.866	0.028357
Q9BW04	Specifically androgen-regulated gene protein OS=Homo sapiens OX=9606 GN=SARG PE=1 SV=2	SARG	63.964	1.34	1.879	2.473	1.042	2.348	1.539	0.542	1.387	1.221	0.394	0.56	0.072902
P06756	Integrin alpha-V OS=Homo sapiens OX=9606 GN=ITGAV PE=1 SV=2	ITGAV	116.04	0.691	1.216	0.836	0.377	0.62	1.531	0.804	0.766	1.015	0.559	1.25	0.38028
O14966	Ras-related protein Rab-7L1 OS=Homo sapiens OX=9606 GN=RAB29 PE=1 SV=1	RAB29	23.155	2.003	1.146	0.855	0.97	1.131	0.96	1.534	0.672	0.899	1.617	0.931	0.7254
O14672	Disintegrin and metalloproteinase domain-containing protein 10 OS=Homo sapiens OX=9606 GN=ADAM10 PE=1 SV=1	ADAM10	84.141	0.595	0.702	1.071	3.247	1.368	2.316	1.005	1.123	1.379	0.94	0.968	0.76194
P53041	Serine/threonine-protein phosphatase 5 OS=Homo sapiens OX=9606 GN=PPP5C PE=1 SV=1	PPP5C	56.878	1.491	1.77	1.806			0.762	1.451	0.793			0.593	0.060043
Q14254	Flotillin-2 OS=Homo sapiens OX=9606 GN=FLOT2 PE=1 SV=2	FLOT2	47.064	0.669	0.873	1.861	1.223	1.472	0.863	1.215	0.857	1.038	1.43	0.886	0.72156
P13498	Cytochrome b-245 light chain OS=Homo sapiens OX=9606 GN=CYBA PE=1 SV=3	CYBA	21.012	0.337	1.227	0.344	0.427	0.301	6.027	0.838	1.233	1.45	1.411	4.157	0.014877
Q08431	Lactadherin OS=Homo sapiens OX=9606 GN=MFGE8 PE=1 SV=3	MFGE8	43.104	0.64	0.705	0.4	0.656	0.522	0.534	1.382	1.576	0.828	0.777	1.744	0.056157
P04920	Anion exchange protein 2 OS=Homo sapiens OX=9606 GN=SLC4A2 PE=1 SV=4	SLC4A2	137.01				9.648	1.249				0.329	0.508	0.077	0.177276
P51692	Signal transducer and activator of transcription 5B OS=Homo sapiens OX=9606 GN=STAT5B PE=1 SV=2	STAT5B	89.865	1.107	1.401	0.976			0.874	1.092	1.042			0.863	0.32794
Q01973	Inactive tyrosine-protein kinase transmembrane receptor ROR1 OS=Homo sapiens OX=9606 GN=ROR1 PE=1 SV=2	ROR1	104.28	0.787	1.208	0.629	0.372	0.415	0.611	1.508	1.043	0.954	0.659	1.4	0.20216
Q01581	"Hydroxymethylglutaryl-CoA synthase, cytoplasmic OS=Homo sapiens OX=9606 GN=HMGCS1 PE=1 SV=2"	HMGCS1	57.293	0.855	0.548	0.786			1.596	1.031	1.489			1.88	0.03038
P51606	N-acylglucosamine 2-epimerase OS=Homo sapiens OX=9606 GN=RENBP PE=1 SV=2	RENBP	48.83	1.448	0.694	1.001	1.614	0.831	0.647	1.152	1.122	0.24	0.535	0.661	0.162999
Q8WV92	MIT domain-containing protein 1 OS=Homo sapiens OX=9606 GN=MITD1 PE=1 SV=1	MITD1	29.314	1.315	0.888	1.297	0.566	0.677	0.761	1.732	1.348	1.093	1.07	1.266	0.27422
Q92499	ATP-dependent RNA helicase DDX1 OS=Homo sapiens OX=9606 GN=DDX1 PE=1 SV=2	DDX1	82.431	0.9	0.617	0.451			1.078	1.284	1.53			1.978	0.033575
Q12756	Kinesin-like protein KIF1A OS=Homo sapiens OX=9606 GN=KIF1A PE=1 SV=2	KIF1A	191.06	0.814	0.31	0.792			0.39	1.894	1.451			1.949	0.39092
P98160	Basement membrane-specific heparan sulfate proteoglycan core protein OS=Homo sapiens OX=9606 GN=HSPG2 PE=1 SV=4	HSPG2	468.83	0.901	1.067	0.547	1.19	0.929	0.758	1.47	1.551	1.203	0.784	1.244	0.33816
Q9HAT2	Sialate O-acetylesterase OS=Homo sapiens OX=9606 GN=SIAE PE=1 SV=1	SIAE	58.314	0.555	1.55	0.929			0.794	1.521	1.289			1.188	0.56512
P08185	Corticosteroid-binding globulin OS=Homo sapiens OX=9606 GN=SERPINA6 PE=1 SV=1	SERPINA6	45.14	0.964	1.104	0.432			1.114	1.191	2.19			1.798	0.165945
P19388	"DNA-directed RNA polymerases I, II, and III subunit RPABC1 OS=Homo sapiens OX=9606 GN=POLR2E PE=1 SV=4"	POLR2E	24.551				0.758	0.579				0.66	1.275	1.447	0.45678
O60763	General vesicular transport factor p115 OS=Homo sapiens OX=9606 GN=USO1 PE=1 SV=2	USO1	107.89	0.807	4.199	0.682			0.638	0.83	1.803			0.575	0.67764
P05026	Sodium/potassium-transporting ATPase subunit beta-1 OS=Homo sapiens OX=9606 GN=ATP1B1 PE=1 SV=1	ATP1B1	35.061	0.924	0.422	0.668	1.146	0.66	0.858	2.133	0.694	1.215	1.15	1.584	0.122838
Q8NC42	E3 ubiquitin-protein ligase RNF149 OS=Homo sapiens OX=9606 GN=RNF149 PE=2 SV=2	RNF149	43.164	0.506	1.312	0.435			0.602	0.932	0.778			1.026	0.7273
P18283	Glutathione peroxidase 2 OS=Homo sapiens OX=9606 GN=GPX2 PE=1 SV=3	GPX2	21.954	0.927	0.735	1.27	1.359	4.477	1.725	0.567	2.42	1.565	1.845	0.926	0.89916
Q9H1Y0	Autophagy protein 5 OS=Homo sapiens OX=9606 GN=ATG5 PE=1 SV=2	ATG5	32.447	3.028	0.394	0.457			1.473	1.275	1.196			1.017	0.54842
Q96FN4	Copine-2 OS=Homo sapiens OX=9606 GN=CPNE2 PE=1 SV=3	CPNE2	61.189	0.518	1.346	0.768			2.849	0.55	0.509			1.485	0.84242
Q8TDR0	TRAF3-interacting protein 1 OS=Homo sapiens OX=9606 GN=TRAF3IP1 PE=1 SV=1	TRAF3IP1	78.631				0.77	0.618				1.223	1.253	1.784	0.033977
Q9HCH3	Copine-5 OS=Homo sapiens OX=9606 GN=CPNE5 PE=1 SV=2	CPNE5	65.733	1.452	0.764	1.727	1.532	1.968	1.98	0.326	0.579	2.197	0.901	0.804	0.33202
P06239	Tyrosine-protein kinase Lck OS=Homo sapiens OX=9606 GN=LCK PE=1 SV=6	LCK	58	1.368	0.748	0.883	1.433	0.946	0.295	0.549	1.762	1.202	1.773	1.038	0.7182
P49788	Retinoic acid receptor responder protein 1 OS=Homo sapiens OX=9606 GN=RARRES1 PE=1 SV=2	RARRES1	33.285	0.469	0.58	0.422	1.113	0.577	2.174	0.623	2.468	3.945	0.328	3.017	0.138837
Q99715	Collagen alpha-1(XII) chain OS=Homo sapiens OX=9606 GN=COL12A1 PE=1 SV=2	COL12A1	333.14	1.597	1.453	1.162	0.805	0.491	0.646	1.812	0.989	0.604	0.58	0.841	0.54462
P20851	C4b-binding protein beta chain OS=Homo sapiens OX=9606 GN=C4BPB PE=1 SV=1	C4BPB	28.357	0.893	0.675	0.732	0.414	0.411	0.547	0.308	4.373	0.801	2.989	2.886	0.29888
P84077	ADP-ribosylation factor 1 OS=Homo sapiens OX=9606 GN=ARF1 PE=1 SV=2	ARF1	20.697	0.56	2.012	1.366	1.765	1.519	0.871	1.274	1.147	1.012	1.211	0.764	0.45562
Q9H008	Phospholysine phosphohistidine inorganic pyrophosphate phosphatase OS=Homo sapiens OX=9606 GN=LHPP PE=1 SV=2	LHPP	29.165	1.327	0.549	1.1			0.851	0.647	0.215			0.576	0.27038
P08195	4F2 cell-surface antigen heavy chain OS=Homo sapiens OX=9606 GN=SLC3A2 PE=1 SV=3	SLC3A2	67.993	0.509	1.189	0.563	0.854	0.496	0.586	2.565	0.486	0.736	0.598	1.377	0.6546
Q8WWF6	DnaJ homolog subfamily B member 3 OS=Homo sapiens OX=9606 GN=DNAJB3 PE=1 SV=1	DNAJB3	16.558	0.977	0.66	0.789			1.392	1.859	1.222			1.844	0.02226
P32929	Cystathionine gamma-lyase OS=Homo sapiens OX=9606 GN=CTH PE=1 SV=3	CTH	44.508				0.666	1.056				0.467	1.233	0.987	0.86954
P04217	Alpha-1B-glycoprotein OS=Homo sapiens OX=9606 GN=A1BG PE=1 SV=4	A1BG	54.253	0.845	0.697	0.498	1.4	0.637	0.97	1.71	1.913	1.054	1.498	1.753	0.027144
Q9UMX0	Ubiquilin-1 OS=Homo sapiens OX=9606 GN=UBQLN1 PE=1 SV=2	UBQLN1	62.518	0.659	5.782	1.357			1.072	1.326	0.638			0.389	0.43816
P43686	26S proteasome regulatory subunit 6B OS=Homo sapiens OX=9606 GN=PSMC4 PE=1 SV=2	PSMC4	47.366	1.547	0.831	0.794			0.745	0.883	2.311			1.242	0.76388
Q8WVJ2	NudC domain-containing protein 2 OS=Homo sapiens OX=9606 GN=NUDCD2 PE=1 SV=1	NUDCD2	17.676	1.046	1.03	1.101			1.719	1.607	1.231			1.434	0.027836
P48637	Glutathione synthetase OS=Homo sapiens OX=9606 GN=GSS PE=1 SV=1	GSS	52.384	2.303	1.252	1.297	1.043	0.957	1.351	0.915	0.642	0.824	1.19	0.718	0.160204
P63208	S-phase kinase-associated protein 1 OS=Homo sapiens OX=9606 GN=SKP1 PE=1 SV=2	SKP1	18.658	1.149	0.696	0.843			1.128	1.424	1.068			1.347	0.142082
Q9H3Z4	DnaJ homolog subfamily C member 5 OS=Homo sapiens OX=9606 GN=DNAJC5 PE=1 SV=1	DNAJC5	22.149	1.269	2.178	1.152	2.347	2.008	1.469	1.223	1.191	1.51	1.778	0.801	0.27542
P21589	5'-nucleotidase OS=Homo sapiens OX=9606 GN=NT5E PE=1 SV=1	NT5E	63.367	2.468	0.593	0.958	1.154	1.86	1.579	1.027	0.827	0.715	0.831	0.708	0.37992
Q9UPX8	SH3 and multiple ankyrin repeat domains protein 2 OS=Homo sapiens OX=9606 GN=SHANK2 PE=1 SV=3	SHANK2	158.82				1.612	2.351				1.04	0.323	0.344	0.187343
Q14517	Protocadherin Fat 1 OS=Homo sapiens OX=9606 GN=FAT1 PE=1 SV=2	FAT1	506.27	1.254	0.917	0.694			0.488	1.495	1.027			1.051	0.95748
P04004	Vitronectin OS=Homo sapiens OX=9606 GN=VTN PE=1 SV=1	VTN	54.305	0.73	0.713	0.325	0.595	0.536	0.793	0.842	2.939	1.014	2.681	2.852	0.021685
P29373	Cellular retinoic acid-binding protein 2 OS=Homo sapiens OX=9606 GN=CRABP2 PE=1 SV=2	CRABP2	15.693	0.895	0.937	2.224	1.135	3.438	1.712	0.953	1.028	1.382	0.573	0.655	0.32438
Q96C24	Synaptotagmin-like protein 4 OS=Homo sapiens OX=9606 GN=SYTL4 PE=1 SV=2	SYTL4	76.023	1.849	1.49	1.372			2.532	1.569	1.395			1.167	0.5636
Q00610	Clathrin heavy chain 1 OS=Homo sapiens OX=9606 GN=CLTC PE=1 SV=5	CLTC	191.61	0.909	1.028	1.097	0.824	1.171	0.576	1.098	1.842	1.282	1.364	1.225	0.49672
Q9BZQ8	Protein Niban 1 OS=Homo sapiens OX=9606 GN=NIBAN1 PE=1 SV=1	NIBAN1	103.13	0.708	4.353	0.549	1.05	0.688	1.476	1.741	0.613	1.295	0.621	0.782	0.98724
P29144	Tripeptidyl-peptidase 2 OS=Homo sapiens OX=9606 GN=TPP2 PE=1 SV=4	TPP2	138.35				1.064	0.543				1.252	1.554	1.746	0.22784
Q9NRM0	"Solute carrier family 2, facilitated glucose transporter member 9 OS=Homo sapiens OX=9606 GN=SLC2A9 PE=1 SV=2"	SLC2A9	58.701	1.539	0.466	0.479			0.71	1.823	0.361			1.165	0.87524
P48594	Serpin B4 OS=Homo sapiens OX=9606 GN=SERPINB4 PE=1 SV=2	SERPINB4	44.853				0.929	2.968				0.693	0.94	0.419	0.35254
O15389	Sialic acid-binding Ig-like lectin 5 OS=Homo sapiens OX=9606 GN=SIGLEC5 PE=1 SV=1	SIGLEC5	60.714				11.259	1.835				1.554	1.351	0.222	0.33576
Q14CN2	Calcium-activated chloride channel regulator 4 OS=Homo sapiens OX=9606 GN=CLCA4 PE=1 SV=2	CLCA4	101.28	0.613	0.686	0.836	0.762	0.578	1.435	0.942	3.49	1.092	1.05	2.305	0.045581
P31151	Protein S100-A7 OS=Homo sapiens OX=9606 GN=S100A7 PE=1 SV=4	S100A7	11.471	0.289	1.911	0.819			3.571	0.38	0.968			1.629	0.69696
O96009	Napsin-A OS=Homo sapiens OX=9606 GN=NAPSA PE=1 SV=1	NAPSA	45.386	0.589	0.644	0.169	0.254	0.136	0.884	1.927	1.225	2.447	1.287	4.336	0.0023395
Q01968	Inositol polyphosphate 5-phosphatase OCRL OS=Homo sapiens OX=9606 GN=OCRL PE=1 SV=3	OCRL	104.2				0.83	2.3				0.998	0.799	0.574	0.49076
Q06124	Tyrosine-protein phosphatase non-receptor type 11 OS=Homo sapiens OX=9606 GN=PTPN11 PE=1 SV=2	PTPN11	68.436	1.301	1.237	1.172	1.495	1.344	1.528	1.133	1.294	1.401	0.907	0.956	0.5827
P52564	Dual specificity mitogen-activated protein kinase kinase 6 OS=Homo sapiens OX=9606 GN=MAP2K6 PE=1 SV=1	MAP2K6	37.492	1.955	1.095	1.034			1.202	1.052	1.03			0.804	0.44548
Q14449	Growth factor receptor-bound protein 14 OS=Homo sapiens OX=9606 GN=GRB14 PE=1 SV=2	GRB14	60.988				0.865	0.73				1.017	0.701	1.077	0.79466
O43280	Trehalase OS=Homo sapiens OX=9606 GN=TREH PE=1 SV=2	TREH	66.567	0.621	1.199	1.201	0.653	0.851	0.402	3.365	0.806	0.536	1.116	1.376	0.89386
Q6J9G0	Tyrosine-protein kinase STYK1 OS=Homo sapiens OX=9606 GN=STYK1 PE=1 SV=4	STYK1	47.576				0.974	1.147				0.84	0.772	0.76	0.097918
O75116	Rho-associated protein kinase 2 OS=Homo sapiens OX=9606 GN=ROCK2 PE=1 SV=4	ROCK2	160.9	1.543	3.136	1.165			1.496	0.911	0.757			0.541	0.188981
O43175	D-3-phosphoglycerate dehydrogenase OS=Homo sapiens OX=9606 GN=PHGDH PE=1 SV=4	PHGDH	56.65	1.651	1.521	0.759	0.771	0.547	0.789	1.183	1.044	0.725	1.106	0.923	0.98142
O75874	Isocitrate dehydrogenase [NADP] cytoplasmic OS=Homo sapiens OX=9606 GN=IDH1 PE=1 SV=2	IDH1	46.659	1.665	2.669	1.465	1.127	1.927	1.075	0.816	0.83	1.098	0.507	0.489	0.0074617
P36871	Phosphoglucomutase-1 OS=Homo sapiens OX=9606 GN=PGM1 PE=1 SV=3	PGM1	61.448	1.316	1.305	0.883	0.904	0.975	0.886	1.335	0.984	0.883	1.335	1.007	0.96868
Q2M3G0	ATP-binding cassette sub-family B member 5 OS=Homo sapiens OX=9606 GN=ABCB5 PE=1 SV=4	ABCB5	138.64				0.812	0.572				0.884	1.312	1.587	0.22514
P60174	Triosephosphate isomerase OS=Homo sapiens OX=9606 GN=TPI1 PE=1 SV=3	TPI1	30.791	1.418	0.856	1.662	1.618	1.768	0.784	0.77	1.12	0.719	1.042	0.606	0.0154841
O75841	Uroplakin-1b OS=Homo sapiens OX=9606 GN=UPK1B PE=1 SV=5	UPK1B	29.643	0.619	0.763	1.937	0.507	0.347	1.016	1.061	1.625	2.358	0.744	1.63	0.131443
Q16531	DNA damage-binding protein 1 OS=Homo sapiens OX=9606 GN=DDB1 PE=1 SV=1	DDB1	126.97	0.801	0.853	0.509			1.014	0.83	0.785			1.215	0.30102
Q12923	Tyrosine-protein phosphatase non-receptor type 13 OS=Homo sapiens OX=9606 GN=PTPN13 PE=1 SV=2	PTPN13	276.9	1.042	0.902	1.07	0.885	1.455	0.673	0.683	1.078	0.684	0.822	0.736	0.041962
Q08209	Serine/threonine-protein phosphatase 2B catalytic subunit alpha isoform OS=Homo sapiens OX=9606 GN=PPP3CA PE=1 SV=1	PPP3CA	58.687				1.248	1.01				1.374	0.871	0.994	0.9272
Q9C0K7	STE20-related kinase adapter protein beta OS=Homo sapiens OX=9606 GN=STRADB PE=1 SV=1	STRADB	47.026	1.274	1.095	0.983			0.441	1.149	1.013			0.777	0.34984
Q14376	UDP-glucose 4-epimerase OS=Homo sapiens OX=9606 GN=GALE PE=1 SV=2	GALE	38.281	1.665	3.571	1.339			1.788	2.376	1.864			0.917	0.99568
Q9Y2S2	Lambda-crystallin homolog OS=Homo sapiens OX=9606 GN=CRYL1 PE=1 SV=3	CRYL1	35.419	1.365	0.678	0.848	0.752	0.663	0.754	1.298	1.137	0.837	1.277	1.232	0.2347
Q9UNF1	Melanoma-associated antigen D2 OS=Homo sapiens OX=9606 GN=MAGED2 PE=1 SV=2	MAGED2	64.953	1.332	0.703	0.734			0.712	2.336	1.124			1.507	0.4542
Q99961	Endophilin-A2 OS=Homo sapiens OX=9606 GN=SH3GL1 PE=1 SV=1	SH3GL1	41.489	1.266	0.691	1.145			1.51	0.778	0.856			1.014	0.99646
P43116	Prostaglandin E2 receptor EP2 subtype OS=Homo sapiens OX=9606 GN=PTGER2 PE=2 SV=2	PTGER2	39.76	0.991	2.273	0.997			1.368	1.322	1.273			0.93	0.97884
O43511	Pendrin OS=Homo sapiens OX=9606 GN=SLC26A4 PE=1 SV=1	SLC26A4	85.722	0.913	0.851	0.455	0.58	0.344	2.814	0.54	1.107	0.731	1.194	2.032	0.10748
Q8IVW8	Protein spinster homolog 2 OS=Homo sapiens OX=9606 GN=SPNS2 PE=1 SV=2	SPNS2	58.043	1.757	1.231	1.187			1.242	1.451	1.176			0.927	0.67176
P37802	Transgelin-2 OS=Homo sapiens OX=9606 GN=TAGLN2 PE=1 SV=3	TAGLN2	22.391	1.287	0.956	1.214	1.017	1.942	1.608	0.762	1.435	1.169	0.81	0.901	0.57266
O00602	Ficolin-1 OS=Homo sapiens OX=9606 GN=FCN1 PE=1 SV=2	FCN1	35.078	0.457	1.01	0.272	3.662	0.737	7.944	0.424	0.626	0.968	1.187	1.816	0.57322
Q9UG01	Intraflagellar transport protein 172 homolog OS=Homo sapiens OX=9606 GN=IFT172 PE=1 SV=2	IFT172	197.57	1.628	0.498	0.937				1.485	0.579			1.011	0.97902
O75369	Filamin-B OS=Homo sapiens OX=9606 GN=FLNB PE=1 SV=2	FLNB	278.16	1.214	1.775	1.087	0.931	1.081	1.179	1.113	0.935	1.113	0.91	0.862	0.32014
O75608	Acyl-protein thioesterase 1 OS=Homo sapiens OX=9606 GN=LYPLA1 PE=1 SV=1	LYPLA1	24.669	1.231	0.277	0.841	1.006	1.765	0.971	1.654	1.077	1.335	0.823	1.145	0.45504
Q7Z5L0	Vitelline membrane outer layer protein 1 homolog OS=Homo sapiens OX=9606 GN=VMO1 PE=1 SV=1	VMO1	21.534	0.578	1.568	0.158	0.791	0.925		1.043	3.052	0.766	0.689	1.726	0.30782
P10643	Complement component C7 OS=Homo sapiens OX=9606 GN=C7 PE=1 SV=2	C7	93.517	1.097	1.457	0.779	0.969	0.577	1.082	1.589	2.155	1.066	1.438	1.502	0.073642
P11021	Endoplasmic reticulum chaperone BiP OS=Homo sapiens OX=9606 GN=HSPA5 PE=1 SV=2	HSPA5	72.332	0.997	1.437	0.592	1.01	0.533	0.91	0.75	1.687	0.861	1.418	1.231	0.37882
P01833	Polymeric immunoglobulin receptor OS=Homo sapiens OX=9606 GN=PIGR PE=1 SV=4	PIGR	83.283	0.509	0.821	1.238	0.91	2.242	5.187	0.772	1.201	1.833	0.761	1.705	0.41654
Q96AC1	Fermitin family homolog 2 OS=Homo sapiens OX=9606 GN=FERMT2 PE=1 SV=1	FERMT2	77.86	0.954	0.929	1.333			1.162	1.768	1.257			1.302	0.20734
P55000	Secreted Ly-6/uPAR-related protein 1 OS=Homo sapiens OX=9606 GN=SLURP1 PE=1 SV=2	SLURP1	11.186	1.306	1.52	2.131	1.183	1.146	2.576	0.459	0.48	0.151	0.215	0.533	0.084176
P01130	Low-density lipoprotein receptor OS=Homo sapiens OX=9606 GN=LDLR PE=1 SV=1	LDLR	95.375	1.026	2.446	0.658	0.825	0.419	2.219	2.168	0.525	0.421	0.241	1.037	0.77292
Q9HB40	Retinoid-inducible serine carboxypeptidase OS=Homo sapiens OX=9606 GN=SCPEP1 PE=1 SV=1	SCPEP1	50.83	0.822	0.695	0.389	0.672	0.707	0.362	0.863	1.13	1.811	1.621	1.762	0.185064
Q6ZN28	Metastasis-associated in colon cancer protein 1 OS=Homo sapiens OX=9606 GN=MACC1 PE=1 SV=2	MACC1	96.638				1.289	1.846				0.907	1.079	0.633	0.155818
Q9UPZ9	Serine/threonine-protein kinase ICK OS=Homo sapiens OX=9606 GN=ICK PE=1 SV=1	ICK	71.426	0.676	0.583	0.733	0.909	0.765	0.506	1.178	1.058	0.478	0.984	1.147	0.71526
Q9UHG0	Doublecortin domain-containing protein 2 OS=Homo sapiens OX=9606 GN=DCDC2 PE=1 SV=2	DCDC2	52.833	1.547	2.886	1.225	1.215	0.709	1.397	0.768	1.198	1.291	1.227	0.776	0.52112
P04626	Receptor tyrosine-protein kinase erbB-2 OS=Homo sapiens OX=9606 GN=ERBB2 PE=1 SV=1	ERBB2	137.91	0.918	1.059	0.727			1.09	0.986	1.063			1.161	0.2319
Q9BUP3	Oxidoreductase HTATIP2 OS=Homo sapiens OX=9606 GN=HTATIP2 PE=1 SV=2	HTATIP2	27.049	0.836	0.731	0.84			1.058	0.845	0.95			1.185	0.101762
P60981	Destrin OS=Homo sapiens OX=9606 GN=DSTN PE=1 SV=3	DSTN	18.506	0.752	0.834	1.481	0.591	0.703	1.206	1.161	1.472	0.939	1.17	1.364	0.073262
Q86YS6	Ras-related protein Rab-43 OS=Homo sapiens OX=9606 GN=RAB43 PE=1 SV=1	RAB43	23.339				0.822	0.8				0.762	1.359	1.308	0.51514
P16401	Histone H1.5 OS=Homo sapiens OX=9606 GN=H1-5 PE=1 SV=3	H1-5	22.58	0.288	0.338	0.257	0.419	1.321	0.43	0.23	1.787	0.9	3.675	2.677	0.2288
Q13421	Mesothelin OS=Homo sapiens OX=9606 GN=MSLN PE=1 SV=2	MSLN	68.985	0.779	0.684	0.703			0.402	1.12	1.309			1.307	0.72426
Q86X76	Deaminated glutathione amidase OS=Homo sapiens OX=9606 GN=NIT1 PE=1 SV=2	NIT1	35.896	1.347	1.241	0.667	0.619	0.636	1.38	1.689	1.52	0.739	1.221	1.452	0.115758
Q16775	"Hydroxyacylglutathione hydrolase, mitochondrial OS=Homo sapiens OX=9606 GN=HAGH PE=1 SV=2"	HAGH	33.805	1.944	2.917	1.732	1.764	1.23	0.83	0.939	1.088	0.945	0.929	0.493	0.0098152
O95772	STARD3 N-terminal-like protein OS=Homo sapiens OX=9606 GN=STARD3NL PE=1 SV=1	STARD3NL	26.654	0.78	0.829	1.022			0.771	1.467	0.888			1.188	0.54574
Q04446	"1,4-alpha-glucan-branching enzyme OS=Homo sapiens OX=9606 GN=GBE1 PE=1 SV=3"	GBE1	80.473	0.695	3.058	0.897	0.728	0.569	1.19	1.106	1.736	0.757	0.983	0.971	0.6537
Q9BXF6	Rab11 family-interacting protein 5 OS=Homo sapiens OX=9606 GN=RAB11FIP5 PE=1 SV=1	RAB11FIP5	70.414	1.392	0.844	1.464			1.108	1.046	0.897			0.825	0.41964
Q86VE9	Serine incorporator 5 OS=Homo sapiens OX=9606 GN=SERINC5 PE=2 SV=1	SERINC5	47.009	1.086	0.74	0.57	0.296	0.494	1.362	1.207	0.646	1.159	1.063	1.707	0.04564
P36952	Serpin B5 OS=Homo sapiens OX=9606 GN=SERPINB5 PE=1 SV=2	SERPINB5	42.1	0.853	1.091	0.512			1.165	1.524	3.481			2.512	0.098163
P04156	Major prion protein OS=Homo sapiens OX=9606 GN=PRNP PE=1 SV=1	PRNP	27.661	0.291	0.808	0.706	1.01	0.67	1.595	0.574	0.366	1.143	0.797	1.284	0.56496
O43493	Trans-Golgi network integral membrane protein 2 OS=Homo sapiens OX=9606 GN=TGOLN2 PE=1 SV=4	TGOLN2	45.879				1.365	0.986				0.312	0.459	0.328	0.047199
P18206	Vinculin OS=Homo sapiens OX=9606 GN=VCL PE=1 SV=4	VCL	123.8	1.119	1.065	1.086	1.218	1.377	1.715	1.054	1.025	0.835	0.856	0.935	0.49366
P22894	Neutrophil collagenase OS=Homo sapiens OX=9606 GN=MMP8 PE=1 SV=1	MMP8	53.411	0.482	0.747	0.185	5.278	0.311	5.676	0.403	0.3	0.97	0.687	1.148	0.72056
Q96FZ7	Charged multivesicular body protein 6 OS=Homo sapiens OX=9606 GN=CHMP6 PE=1 SV=3	CHMP6	23.485	1.092	1.164	0.841	0.747	0.997	0.702	0.853	1.147	1.261	1.288	1.085	0.65404
P22732	"Solute carrier family 2, facilitated glucose transporter member 5 OS=Homo sapiens OX=9606 GN=SLC2A5 PE=1 SV=1"	SLC2A5	54.973	0.72	0.851	0.67	0.47	0.433	0.708	1.684	1.051	0.78	1.715	1.889	0.029298
Q14642	Inositol polyphosphate-5-phosphatase A OS=Homo sapiens OX=9606 GN=INPP5A PE=1 SV=1	INPP5A	47.819	1.19	1.378	1.55	0.899	3.032	1.977	1.409	1.002	0.868	0.852	0.759	0.37692
P05783	"Keratin, type I cytoskeletal 18 OS=Homo sapiens OX=9606 GN=KRT18 PE=1 SV=2"	KRT18	48.057	1.657	1.744	1.05			1.463	0.892	1.355			0.834	0.4645
P08133	Annexin A6 OS=Homo sapiens OX=9606 GN=ANXA6 PE=1 SV=3	ANXA6	75.872	1.07	0.83	0.7	1.384	0.683	2.467	1.351	0.771	1.09	1.103	1.453	0.194164
Q9Y6U3	Adseverin OS=Homo sapiens OX=9606 GN=SCIN PE=1 SV=4	SCIN	80.488	1.391	1.566	1.349			1.17	1.278	0.692			0.729	0.151817
P15374	Ubiquitin carboxyl-terminal hydrolase isozyme L3 OS=Homo sapiens OX=9606 GN=UCHL3 PE=1 SV=1	UCHL3	26.182				0.893	1.207				0.996	1.141	1.018	0.8875
Q99571	P2X purinoceptor 4 OS=Homo sapiens OX=9606 GN=P2RX4 PE=1 SV=2	P2RX4	43.369	0.891	0.368	0.802	0.573	0.818	0.42	1.109	0.666	1.258	2.591	1.751	0.26106
P13796	Plastin-2 OS=Homo sapiens OX=9606 GN=LCP1 PE=1 SV=6	LCP1	70.288	0.652	1.088	0.88	2.052	0.673	3.818	0.664	0.848	1.897	0.876	1.516	0.48158
P51812	Ribosomal protein S6 kinase alpha-3 OS=Homo sapiens OX=9606 GN=RPS6KA3 PE=1 SV=1	RPS6KA3	83.735	1.245	1.153	0.752			1.297	1.596	1.005			1.237	0.34852
P40306	Proteasome subunit beta type-10 OS=Homo sapiens OX=9606 GN=PSMB10 PE=1 SV=1	PSMB10	28.936				2.741	0.909				0.425	0.649	0.294	0.20368
P55072	Transitional endoplasmic reticulum ATPase OS=Homo sapiens OX=9606 GN=VCP PE=1 SV=4	VCP	89.321	1.119	2.443	0.895	0.982	0.767	0.737	0.907	1.584	1.15	1.022	0.87	0.75104
P41732	Tetraspanin-7 OS=Homo sapiens OX=9606 GN=TSPAN7 PE=1 SV=2	TSPAN7	27.574				0.885	1.008				0.088	0.306	0.208	0.107816
O15118	NPC intracellular cholesterol transporter 1 OS=Homo sapiens OX=9606 GN=NPC1 PE=1 SV=2	NPC1	142.17	0.846	1.137	0.74	0.874	0.94	0.939	1.053	0.55	0.42	1.383	0.958	0.62028
Q92743	Serine protease HTRA1 OS=Homo sapiens OX=9606 GN=HTRA1 PE=1 SV=1	HTRA1	51.286				0.713	0.588				1.142	1.866	2.312	0.091102
P20339	Ras-related protein Rab-5A OS=Homo sapiens OX=9606 GN=RAB5A PE=1 SV=2	RAB5A	23.658	2.103	1.396	1.362	1.531	1.794	0.935	1.213	0.815	0.576	0.516	0.495	0.0031206
Q99805	Transmembrane 9 superfamily member 2 OS=Homo sapiens OX=9606 GN=TM9SF2 PE=1 SV=1	TM9SF2	75.775				1.055	0.672				0.617	0.978	0.924	0.82592
Q99829	Copine-1 OS=Homo sapiens OX=9606 GN=CPNE1 PE=1 SV=1	CPNE1	59.058	0.97	1.116	1.306	0.882	0.753	1.413	0.956	1.227	1.396	0.921	1.176	0.24834
Q8TDW5	Synaptotagmin-like protein 5 OS=Homo sapiens OX=9606 GN=SYTL5 PE=1 SV=1	SYTL5	81.522				1.076	3.075				1.04	0.698	0.419	0.30938
P31949	Protein S100-A11 OS=Homo sapiens OX=9606 GN=S100A11 PE=1 SV=2	S100A11	11.74	0.855	0.807	1.28	1.939	4.662	2.152	1.076	1.4	1.736	0.444	0.713	0.59784
Q12907	Vesicular integral-membrane protein VIP36 OS=Homo sapiens OX=9606 GN=LMAN2 PE=1 SV=1	LMAN2	40.228	0.684	0.637	0.543			0.865	1.75	2.339			2.658	0.040935
Q7Z7N9	Transmembrane protein 179B OS=Homo sapiens OX=9606 GN=TMEM179B PE=1 SV=1	TMEM179B	23.55	0.943	1.135	0.612			0.588	1.259	0.712			0.951	0.81682
Q6UXY8	Transmembrane channel-like protein 5 OS=Homo sapiens OX=9606 GN=TMC5 PE=2 SV=3	TMC5	114.8	0.766	0.862	1.277	2.774	2.958	2.588	0.829	1.554	0.705	0.714	0.74	0.4809
P62491	Ras-related protein Rab-11A OS=Homo sapiens OX=9606 GN=RAB11A PE=1 SV=3	RAB11A	24.393				0.908	1.011				1.021	0.798	0.948	0.70062
Q14766	Latent-transforming growth factor beta-binding protein 1 OS=Homo sapiens OX=9606 GN=LTBP1 PE=1 SV=4	LTBP1	186.79				1.116	0.705				1.081	2.141	1.769	0.32034
Q9NZH0	G-protein coupled receptor family C group 5 member B OS=Homo sapiens OX=9606 GN=GPRC5B PE=2 SV=2	GPRC5B	44.794	2.101	0.859	1.59	1.148	1.068	1.645	0.942	1.209	1.724	1.081	0.976	0.99398
P62136	Serine/threonine-protein phosphatase PP1-alpha catalytic subunit OS=Homo sapiens OX=9606 GN=PPP1CA PE=1 SV=1	PPP1CA	37.512	0.61	0.655	0.9			1.165	1.032	1.225			1.581	0.022419
Q9UQ80	Proliferation-associated protein 2G4 OS=Homo sapiens OX=9606 GN=PA2G4 PE=1 SV=3	PA2G4	43.786	1.035	1.052	0.958			0.867	1.487	2.17			1.486	0.3443
Q9P121	Neurotrimin OS=Homo sapiens OX=9606 GN=NTM PE=1 SV=1	NTM	37.971				0.551	0.446				0.883	0.897	1.785	0.031281
Q8WUM4	Programmed cell death 6-interacting protein OS=Homo sapiens OX=9606 GN=PDCD6IP PE=1 SV=1	PDCD6IP	96.022	1.55	0.759	1.383	0.933	0.958	0.983	1.215	1.126	0.968	1.192	0.982	0.92892
P19835	Bile salt-activated lipase OS=Homo sapiens OX=9606 GN=CEL PE=1 SV=3	CEL	79.321	0.974	0.715	0.596			0.454	0.715	0.509			0.734	0.195697
P08034	Gap junction beta-1 protein OS=Homo sapiens OX=9606 GN=GJB1 PE=1 SV=1	GJB1	32.024	0.605	1.431	0.703			0.682	0.989	0.642			0.844	0.72264
Q14914	Prostaglandin reductase 1 OS=Homo sapiens OX=9606 GN=PTGR1 PE=1 SV=2	PTGR1	35.869	0.885	1.66	0.693	0.484	0.918	1.461	1.571	0.892	1.417	1.329	1.438	0.093398
Q9BXS4	Transmembrane protein 59 OS=Homo sapiens OX=9606 GN=TMEM59 PE=1 SV=1	TMEM59	36.223	2.837	1.957	0.866	0.753	0.981	0.396	1.528	1.214	0.366	1.176	0.633	0.25862
O00499	Myc box-dependent-interacting protein 1 OS=Homo sapiens OX=9606 GN=BIN1 PE=1 SV=1	BIN1	64.699	1.531	1.511	0.8	1.796	0.631	0.638	1.336	0.482	0.741	1.399	0.733	0.30888
Q9UP95	Solute carrier family 12 member 4 OS=Homo sapiens OX=9606 GN=SLC12A4 PE=1 SV=2	SLC12A4	120.65	0.599	0.9	0.527			0.793	1.794	0.623			1.584	0.34964
Q03154	Aminoacylase-1 OS=Homo sapiens OX=9606 GN=ACY1 PE=1 SV=1	ACY1	45.884	1.241	0.842	0.834	0.63	0.881	0.796	1.515	1.131	0.817	1.281	1.251	0.22804
Q9Y287	Integral membrane protein 2B OS=Homo sapiens OX=9606 GN=ITM2B PE=1 SV=1	ITM2B	30.338	1.513	0.787	1.08	0.737	0.844	0.438	1.743	1.488	0.942	0.768	1.084	0.98504
Q14974	Importin subunit beta-1 OS=Homo sapiens OX=9606 GN=KPNB1 PE=1 SV=2	KPNB1	97.169	1.689	2.307	1.931	1.111	1.171	1.468	1.102	1.473	0.877	1.01	0.722	0.118078
Q7LBR1	Charged multivesicular body protein 1b OS=Homo sapiens OX=9606 GN=CHMP1B PE=1 SV=1	CHMP1B	22.109	1.969	0.655	1.288	0.829	1.169	0.869	0.996	0.69	0.856	1.183	0.777	0.37676
P04792	Heat shock protein beta-1 OS=Homo sapiens OX=9606 GN=HSPB1 PE=1 SV=2	HSPB1	22.782	1.335	0.883	1.273	0.781	0.818	0.694	0.858	1.646	0.477	1.326	0.983	0.7358
P0DOX2	Immunoglobulin alpha-2 heavy chain OS=Homo sapiens OX=9606 PE=1 SV=2	---	48.934		0.688	3.977			8.467	1.053				2.041	0.7069
O14732	Inositol monophosphatase 2 OS=Homo sapiens OX=9606 GN=IMPA2 PE=1 SV=1	IMPA2	31.321				0.734	0.611				0.934	1.859	2.077	0.197776
Q14894	Ketimine reductase mu-crystallin OS=Homo sapiens OX=9606 GN=CRYM PE=1 SV=1	CRYM	33.775	1.91	1.288	1.183	0.643	2.482	0.43	0.898	0.795	1.101	0.812	0.538	0.077023
Q96FW1	Ubiquitin thioesterase OTUB1 OS=Homo sapiens OX=9606 GN=OTUB1 PE=1 SV=2	OTUB1	31.284	1.145	2.111	0.956			0.831	1.085	1.171			0.733	0.37424
Q6WKZ4	Rab11 family-interacting protein 1 OS=Homo sapiens OX=9606 GN=RAB11FIP1 PE=1 SV=3	RAB11FIP1	137.17	1.651	1.994	1.189	1.156	1.864	1.066	0.587	0.741	1.015	1.19	0.586	0.013878
Q13099	Intraflagellar transport protein 88 homolog OS=Homo sapiens OX=9606 GN=IFT88 PE=1 SV=2	IFT88	94.269	1.139	1.683	0.495			0.631	1.485	0.904			0.91	0.93532
O95466	Formin-like protein 1 OS=Homo sapiens OX=9606 GN=FMNL1 PE=1 SV=3	FMNL1	121.85				2.223	0.561				0.716	1.593	0.829	0.96038
P02760	Protein AMBP OS=Homo sapiens OX=9606 GN=AMBP PE=1 SV=1	AMBP	38.999	1.095	1.158	0.731	1.03	0.778	1.201	1.023	0.544	0.69	0.753	0.879	0.39534
P41218	Myeloid cell nuclear differentiation antigen OS=Homo sapiens OX=9606 GN=MNDA PE=1 SV=1	MNDA	45.836				1.067	1.135				1.382	5.928	3.32	0.31998
P19086	Guanine nucleotide-binding protein G(z) subunit alpha OS=Homo sapiens OX=9606 GN=GNAZ PE=1 SV=3	GNAZ	40.923	1.131	0.899	0.622	1.283	0.773	1.544	1.491	1.029	0.913	1.081	1.287	0.153155
P63241	Eukaryotic translation initiation factor 5A-1 OS=Homo sapiens OX=9606 GN=EIF5A PE=1 SV=2	EIF5A	16.832	1.237	2.183	1.049			3.003	1.143	0.588			1.059	0.83948
P00734	Prothrombin OS=Homo sapiens OX=9606 GN=F2 PE=1 SV=2	F2	70.036	1.204	1.133	0.883	0.793	0.834	1.445	0.607	1.398	0.766	1.551	1.19	0.57956
P54289	Voltage-dependent calcium channel subunit alpha-2/delta-1 OS=Homo sapiens OX=9606 GN=CACNA2D1 PE=1 SV=3	CACNA2D1	124.57	1.153	0.809	0.931	0.677	0.646	0.727	1.221	1.042	0.992	1.416	1.28	0.149684
Q86Y38	Xylosyltransferase 1 OS=Homo sapiens OX=9606 GN=XYLT1 PE=1 SV=1	XYLT1	107.57	1.709	4.512	1.559			1.015	0.319	0.631			0.253	0.046764
Q717R9	Cystin-1 OS=Homo sapiens OX=9606 GN=CYS1 PE=1 SV=1	CYS1	16.393	3.26	2.329	2.009			1.472		0.665			0.422	0.078179
P63096	Guanine nucleotide-binding protein G(i) subunit alpha-1 OS=Homo sapiens OX=9606 GN=GNAI1 PE=1 SV=2	GNAI1	40.361	1.101	0.707	1.259	0.85	0.778	0.87	1.708	0.973	1.061	1.647	1.333	0.161301
O43581	Synaptotagmin-7 OS=Homo sapiens OX=9606 GN=SYT7 PE=1 SV=3	SYT7	45.501	1.386	6.492	1.052			1.425	1.57	0.683			0.412	0.38532
O95816	BAG family molecular chaperone regulator 2 OS=Homo sapiens OX=9606 GN=BAG2 PE=1 SV=1	BAG2	23.772	1.365	0.734	0.777	0.765	0.7	1.382	0.876	0.486	0.765	1.437	1.139	0.71892
P00918	Carbonic anhydrase 2 OS=Homo sapiens OX=9606 GN=CA2 PE=1 SV=2	CA2	29.246	1.241	0.618	1.238	1.022	0.692	0.603	0.801	1.346	1.094	0.904	0.987	0.96644
P09488	Glutathione S-transferase Mu 1 OS=Homo sapiens OX=9606 GN=GSTM1 PE=1 SV=3	GSTM1	25.712				1.556	2.011				2.353	0.928	0.92	0.7451
Q96GS6	Alpha/beta hydrolase domain-containing protein 17A OS=Homo sapiens OX=9606 GN=ABHD17A PE=1 SV=1	ABHD17A	33.989	1.33	1.059	1.019			0.696	1.171	0.752			0.768	0.194416
Q71DI3	Histone H3.2 OS=Homo sapiens OX=9606 GN=HIST2H3A PE=1 SV=3	HIST2H3A	15.388				2.715	0.675				1.29	2.634	1.158	0.73118
P56557	Transmembrane protein 50B OS=Homo sapiens OX=9606 GN=TMEM50B PE=1 SV=2	TMEM50B	17.936				0.671	0.319				1.58	1.436	3.046	0.087764
P32320	Cytidine deaminase OS=Homo sapiens OX=9606 GN=CDA PE=1 SV=2	CDA	16.185	0.849	1.678	0.749			0.712	0.726	0.871			0.705	0.32854
Q6UX06	Olfactomedin-4 OS=Homo sapiens OX=9606 GN=OLFM4 PE=1 SV=1	OLFM4	57.279	0.256	0.55	0.686	1.692	0.722	0.505	0.637	1.034	2.254	0.705	1.315	0.47474
P42658	Dipeptidyl aminopeptidase-like protein 6 OS=Homo sapiens OX=9606 GN=DPP6 PE=1 SV=2	DPP6	97.587	2.139	1.003	2.301			0.793	0.542	0.486			0.335	0.025663
O43687	A-kinase anchor protein 7 isoforms alpha and beta OS=Homo sapiens OX=9606 GN=AKAP7 PE=1 SV=4	AKAP7	11.464	1.448	1.23	1.113			1.644	1.49	0.944			1.076	0.7976
P13866	Sodium/glucose cotransporter 1 OS=Homo sapiens OX=9606 GN=SLC5A1 PE=1 SV=1	SLC5A1	73.497	1.084	1.172	1.031	0.801	1.969	0.461	2.553	0.523	1.195	0.483	0.861	0.3644
Q9UI12	V-type proton ATPase subunit H OS=Homo sapiens OX=9606 GN=ATP6V1H PE=1 SV=1	ATP6V1H	55.882	0.658	1.022	1.13	0.875	0.719	0.868	0.967	1.051	0.704	0.82	1.001	0.9208
P16949	Stathmin OS=Homo sapiens OX=9606 GN=STMN1 PE=1 SV=3	STMN1	17.302	0.909	1.536	0.79			1.478	0.92	0.729			0.967	0.90824
Q9BVJ7	Dual specificity protein phosphatase 23 OS=Homo sapiens OX=9606 GN=DUSP23 PE=1 SV=1	DUSP23	16.588	0.837	0.62	1.052			1	0.979	1.1			1.227	0.22322
P28065	Proteasome subunit beta type-9 OS=Homo sapiens OX=9606 GN=PSMB9 PE=1 SV=2	PSMB9	23.264				2.011	1.087				1.826	0.646	0.798	0.66026
P23588	Eukaryotic translation initiation factor 4B OS=Homo sapiens OX=9606 GN=EIF4B PE=1 SV=2	EIF4B	69.15				0.888	0.938				0.996	0.798	0.982	0.85636
Q15836	Vesicle-associated membrane protein 3 OS=Homo sapiens OX=9606 GN=VAMP3 PE=1 SV=3	VAMP3	11.309	0.489	1.183	0.434	0.636	0.616	0.496	2.012	0.909	0.844	1.163	1.615	0.162339
O14773	Tripeptidyl-peptidase 1 OS=Homo sapiens OX=9606 GN=TPP1 PE=1 SV=2	TPP1	61.247	0.752	1.519	0.399	0.876	0.64	1.438	1.208	1.728	1.674	0.879	1.655	0.05224
Q93099	"Homogentisate 1,2-dioxygenase OS=Homo sapiens OX=9606 GN=HGD PE=1 SV=2"	HGD	49.963	1.117	0.541	0.733	0.642	1.041	0.681	2.371	0.837	0.632	1.871	1.569	0.30234
P35237	Serpin B6 OS=Homo sapiens OX=9606 GN=SERPINB6 PE=1 SV=3	SERPINB6	42.621	1.368	1.109	0.765			1.01	1.039	0.96			0.928	0.80904
P26641	Elongation factor 1-gamma OS=Homo sapiens OX=9606 GN=EEF1G PE=1 SV=3	EEF1G	50.118	0.958	0.948	0.434			1.21	0.626	2.014			1.645	0.3513
Q9Y4F4	TOG array regulator of axonemal microtubules protein 1 OS=Homo sapiens OX=9606 GN=TOGARAM1 PE=1 SV=4	TOGARAM1	189.36	0.951	0.622	0.664	0.504	0.502	0.978	1.545	0.957	0.997	1.177	1.743	0.0049233
Q9ULV4	Coronin-1C OS=Homo sapiens OX=9606 GN=CORO1C PE=1 SV=1	CORO1C	53.248	1.586	1.55	1.699	1.826	1.572	1.387	0.938	1.572	0.719	0.919	0.672	0.041183
P02774	Vitamin D-binding protein OS=Homo sapiens OX=9606 GN=GC PE=1 SV=2	GC	52.917	0.818	2.228	0.645	0.602	0.397	1.031	0.53	2.642	0.665	1.692	1.399	0.41986
P46439	Glutathione S-transferase Mu 5 OS=Homo sapiens OX=9606 GN=GSTM5 PE=1 SV=3	GSTM5	25.674	1.809	0.702	0.817			0.664	1.029	1.022			0.816	0.70742
P00450	Ceruloplasmin OS=Homo sapiens OX=9606 GN=CP PE=1 SV=1	CP	122.2	0.569	1.101	0.853	2.195	1.901	1.188	0.695	2.553	1.08	1.691	1.089	0.75114
P13727	Bone marrow proteoglycan OS=Homo sapiens OX=9606 GN=PRG2 PE=1 SV=2	PRG2	25.205	0.622	0.617	0.353	0.447	0.344	1.73	1.284	2.217	1.658	0.526	3.112	0.0052375
P51674	Neuronal membrane glycoprotein M6-a OS=Homo sapiens OX=9606 GN=GPM6A PE=1 SV=2	GPM6A	31.209	0.513	0.543	0.544	0.696	0.606	0.651	1.161	1.896	1.11	1.368	2.132	0.0178977
Q9UBP0	Spastin OS=Homo sapiens OX=9606 GN=SPAST PE=1 SV=1	SPAST	67.196	1.343	1.06	1.246	0.914	0.966	0.863	1.265	1.043	1.099	1.077	0.967	0.76162
P10301	Ras-related protein R-Ras OS=Homo sapiens OX=9606 GN=RRAS PE=1 SV=1	RRAS	23.48	1.427	1.763	1.553			0.924	1.073	0.789			0.587	0.0076762
C9JI98	Transmembrane protein 238 OS=Homo sapiens OX=9606 GN=TMEM238 PE=1 SV=1	TMEM238	18.04				1.218	1.571				0.362	0.454	0.293	0.0187205
Q9H3U1	Protein unc-45 homolog A OS=Homo sapiens OX=9606 GN=UNC45A PE=1 SV=1	UNC45A	103.08	0.872	2.719	0.886			1.002	1.166	1.305			0.776	0.79474
P49588	"Alanine--tRNA ligase, cytoplasmic OS=Homo sapiens OX=9606 GN=AARS PE=1 SV=2"	AARS	106.81				1.013	1.184				0.847	1.241	0.95	0.77942
Q7L523	Ras-related GTP-binding protein A OS=Homo sapiens OX=9606 GN=RRAGA PE=1 SV=1	RRAGA	36.566	1.142	1.437	0.949			0.615	0.961	0.487			0.585	0.072899
O00322	Uroplakin-1a OS=Homo sapiens OX=9606 GN=UPK1A PE=1 SV=1	UPK1A	28.879	0.886	0.595	1.458	0.879	2.514	1.238	1.1	1.426	1.146	0.506	0.855	0.7963
P32119	Peroxiredoxin-2 OS=Homo sapiens OX=9606 GN=PRDX2 PE=1 SV=5	PRDX2	21.892	1.562	0.672	0.753	0.796	0.626	1.002	1.048	0.83	0.878	1.264	1.139	0.34584
O15078	Centrosomal protein of 290 kDa OS=Homo sapiens OX=9606 GN=CEP290 PE=1 SV=2	CEP290	290.38				0.453	0.39					6.558	15.559
Q13228	Methanethiol oxidase OS=Homo sapiens OX=9606 GN=SELENBP1 PE=1 SV=2	SELENBP1	52.39	0.847	2.113	0.93	0.717	0.479	0.634	1.328	0.586	0.919	1.018	0.882	0.88512
Q96DA0	Zymogen granule protein 16 homolog B OS=Homo sapiens OX=9606 GN=ZG16B PE=1 SV=3	ZG16B	22.739				0.41	0.444				3.377	0.685	4.756	0.25248
Q14152	Eukaryotic translation initiation factor 3 subunit A OS=Homo sapiens OX=9606 GN=EIF3A PE=1 SV=1	EIF3A	166.57	1.516	2.941	0.919			0.879	1.41	1.812			0.763	0.64106
Q6NT16	MFS-type transporter SLC18B1 OS=Homo sapiens OX=9606 GN=SLC18B1 PE=1 SV=1	SLC18B1	48.868				1.05	1.088				0.741	1.622	1.105	0.95426
P13987	CD59 glycoprotein OS=Homo sapiens OX=9606 GN=CD59 PE=1 SV=1	CD59	14.177	0.79	0.739	1.406	1.562	1.576	0.849	1.109	0.93	0.713	0.767	0.719	0.159437
P50895	Basal cell adhesion molecule OS=Homo sapiens OX=9606 GN=BCAM PE=1 SV=2	BCAM	67.404	1.642	1.217	0.756	0.408	0.718	0.375	2.138	1.446	1.509	0.961	1.356	0.5057
P15289	Arylsulfatase A OS=Homo sapiens OX=9606 GN=ARSA PE=1 SV=3	ARSA	53.588	0.967	1.054	1.055	0.91	0.97	0.519	1.623	0.803	0.856	0.635	0.895	0.38536
Q8NG27	E3 ubiquitin-protein ligase Praja-1 OS=Homo sapiens OX=9606 GN=PJA1 PE=1 SV=2	PJA1	71.002	2.407	5.727	1.208			1.076	0.582	1.094			0.295	0.098517
P98164	Low-density lipoprotein receptor-related protein 2 OS=Homo sapiens OX=9606 GN=LRP2 PE=1 SV=3	LRP2	521.95	0.706	0.792	0.478	0.59	0.346	1.117	2.59	0.808	1.388	0.867	2.325	0.0151157
Q12846	Syntaxin-4 OS=Homo sapiens OX=9606 GN=STX4 PE=1 SV=2	STX4	34.18	0.623	2.234		1.328	0.717	0.836	1.685		0.812	1.254	0.936	0.9558
O15231	Zinc finger protein 185 OS=Homo sapiens OX=9606 GN=ZNF185 PE=1 SV=3	ZNF185	73.525				1.93	5.075				2.254	0.805	0.437	0.35496
P55160	Nck-associated protein 1-like OS=Homo sapiens OX=9606 GN=NCKAP1L PE=1 SV=3	NCKAP1L	128.15				5.237	1.114				0.979	1.061	0.321	0.3814
Q5T0F9	Coiled-coil and C2 domain-containing protein 1B OS=Homo sapiens OX=9606 GN=CC2D1B PE=1 SV=1	CC2D1B	94.223	1.126	0.867	1.03	1.011	1.047	0.754	1.189	1.031	0.563	0.92	0.877	0.27734
Q9GZX9	Twisted gastrulation protein homolog 1 OS=Homo sapiens OX=9606 GN=TWSG1 PE=1 SV=1	TWSG1	25.017	2.013	1.058	0.711	1.077	0.779	1.572	0.578	1.931	1.358	0.337	1.024	0.8147
O15230	Laminin subunit alpha-5 OS=Homo sapiens OX=9606 GN=LAMA5 PE=1 SV=8	LAMA5	399.73				0.896	0.687				1.17	0.783	1.234	0.49576
Q9HCN3	Post-GPI attachment to proteins factor 6 OS=Homo sapiens OX=9606 GN=TMEM8A PE=1 SV=3	TMEM8A	84.76				1.18	0.713				1.099	1.277	1.255	0.43304
Q10588	ADP-ribosyl cyclase/cyclic ADP-ribose hydrolase 2 OS=Homo sapiens OX=9606 GN=BST1 PE=1 SV=2	BST1	35.724	2.412	1.501	2.531	2.649	2.122	3.197	0.784	0.146	1.086	0.776	0.534	0.113016
Q09666	Neuroblast differentiation-associated protein AHNAK OS=Homo sapiens OX=9606 GN=AHNAK PE=1 SV=2	AHNAK	629.09	0.767	1.14	0.898	0.833	1.513	1.205	0.57	1.32	1.308	0.712	0.993	0.8856
P63261	"Actin, cytoplasmic 2 OS=Homo sapiens OX=9606 GN=ACTG1 PE=1 SV=1"	ACTG1	41.792	0.612	1.829	1.805	1.268	2.007	0.899	0.857	1.549	0.879	0.93	0.68	0.21322
O00592	Podocalyxin OS=Homo sapiens OX=9606 GN=PODXL PE=1 SV=2	PODXL	58.635	2.028	1.496	0.876	0.616	1.724	0.362	1.241	1.675	0.955	0.608	0.718	0.31784
P43250	G protein-coupled receptor kinase 6 OS=Homo sapiens OX=9606 GN=GRK6 PE=1 SV=2	GRK6	65.99				1.929	2.786				1.237	1.129	0.502	0.070725
P07339	Cathepsin D OS=Homo sapiens OX=9606 GN=CTSD PE=1 SV=1	CTSD	44.552	1.042	6.104	0.652	0.796	0.744	1.383	1.827	1.421	1.733	1.021	0.791	0.6792
P17655	Calpain-2 catalytic subunit OS=Homo sapiens OX=9606 GN=CAPN2 PE=1 SV=6	CAPN2	79.994	1.122	0.747	0.737	0.726	0.703	0.857	1.303	1.49	0.893	0.831	1.332	0.103822
P21579	Synaptotagmin-1 OS=Homo sapiens OX=9606 GN=SYT1 PE=1 SV=1	SYT1	47.573	2.049	34.553	0.667			1.311	1.826	0.352			0.094	0.35274
P04839	Cytochrome b-245 heavy chain OS=Homo sapiens OX=9606 GN=CYBB PE=1 SV=2	CYBB	65.335	0.473	0.498	0.281	4.362	0.603	5.129	0.432	0.999	1.971	1.362	1.591	0.29014
P17213	Bactericidal permeability-increasing protein OS=Homo sapiens OX=9606 GN=BPI PE=1 SV=4	BPI	53.899	0.782	0.763	0.389	1.498	0.932	9.322	0.508	0.367	0.211	0.891	2.589	0.99816
Q9Y2A7	Nck-associated protein 1 OS=Homo sapiens OX=9606 GN=NCKAP1 PE=1 SV=1	NCKAP1	128.79	0.746	0.591	1.081	1.027	1.576	1.291	1.022	0.768	0.779	0.948	0.958	0.97568
Q9UHI7	Solute carrier family 23 member 1 OS=Homo sapiens OX=9606 GN=SLC23A1 PE=1 SV=3	SLC23A1	64.83	0.492	0.974	1.163	1.458	0.886	0.307	2.575	0.521	2.395	0.517	1.27	0.8878
Q16625	Occludin OS=Homo sapiens OX=9606 GN=OCLN PE=1 SV=1	OCLN	59.143	0.573	0.738	0.296			0.942	1.668	1.302			2.434	0.043124
P16278	Beta-galactosidase OS=Homo sapiens OX=9606 GN=GLB1 PE=1 SV=2	GLB1	76.074	0.661	1.646	1.45	0.447	0.711	0.601	0.529	0.791	1.718	0.882	0.92	0.86876
Q13442	28 kDa heat- and acid-stable phosphoprotein OS=Homo sapiens OX=9606 GN=PDAP1 PE=1 SV=1	PDAP1	20.63	1.449	1.084	1.073			0.614	0.659	0.79			0.572	0.011024
Q13177	Serine/threonine-protein kinase PAK 2 OS=Homo sapiens OX=9606 GN=PAK2 PE=1 SV=3	PAK2	58.042	1.685	1.843	0.923	1.689	1.827	1.201	1.278	0.834	0.991	1.056	0.673	0.036419
A0A024RBG1	Diphosphoinositol polyphosphate phosphohydrolase NUDT4B OS=Homo sapiens OX=9606 GN=NUDT4B PE=3 SV=1	NUDT4B	20.434	0.796	1.342	1.368			1.157	0.85	0.999			0.857	0.5414
Q86YQ8	Copine-8 OS=Homo sapiens OX=9606 GN=CPNE8 PE=1 SV=2	CPNE8	63.107	0.665	0.369	0.746	1.132	1.543	0.78	1.09	0.805	0.848	1.045	1.025	0.64004
Q9ULZ2	Signal-transducing adaptor protein 1 OS=Homo sapiens OX=9606 GN=STAP1 PE=1 SV=1	STAP1	34.291	1.254	1.89	1.487			0.985	0.555	0.963			0.54	0.046256
Q9UBP9	PTB domain-containing engulfment adapter protein 1 OS=Homo sapiens OX=9606 GN=GULP1 PE=1 SV=1	GULP1	34.49	0.848	0.715	0.826			1.035	1.356	0.882			1.37	0.091244
Q8IZR5	CKLF-like MARVEL transmembrane domain-containing protein 4 OS=Homo sapiens OX=9606 GN=CMTM4 PE=1 SV=1	CMTM4	25.827	1.371	0.906	0.719	1.187	0.64	0.843	2.85	0.567	0.601	0.703	1.154	0.9232
P01709	Immunoglobulin lambda variable 2-8 OS=Homo sapiens OX=9606 GN=IGLV2-8 PE=1 SV=2	IGLV2-8	12.382	0.438	0.448	0.418			0.93	0.631	3.956			4.231	0.18438
Q8TBF2	Prostamide/prostaglandin F synthase OS=Homo sapiens OX=9606 GN=PRXL2B PE=1 SV=1	PRXL2B	21.222	1.415	1.41	1.908			1.194	0.592	0.681			0.521	0.043555
P16150	Leukosialin OS=Homo sapiens OX=9606 GN=SPN PE=1 SV=1	SPN	40.321	0.516	1.176	0.448	3.678	0.53	4.749	0.665	0.569	1.211	1.272	1.334	0.56044
Q5VU43	Myomegalin OS=Homo sapiens OX=9606 GN=PDE4DIP PE=1 SV=3	PDE4DIP	265.1				0.288	0.324				0.234	0.76	1.624	0.64054
Q99536	Synaptic vesicle membrane protein VAT-1 homolog OS=Homo sapiens OX=9606 GN=VAT1 PE=1 SV=2	VAT1	41.92	1.286	1.157	0.603	0.802	1.12	0.948	1.42	0.9	1.327	1.267	1.18	0.30168
P51159	Ras-related protein Rab-27A OS=Homo sapiens OX=9606 GN=RAB27A PE=1 SV=3	RAB27A	24.868	0.992	1.697	0.371	1.617	1.15	1.388	1.838	0.435	1.767	0.81	1.071	0.87568
Q71UI9	Histone H2A.V OS=Homo sapiens OX=9606 GN=H2AFV PE=1 SV=3	H2AFV	13.509	1.368	4.835	0.29	2.026	0.76	0.255	0.266	1.733	1.291	2.462	0.647	0.55604
Q02790	Peptidyl-prolyl cis-trans isomerase FKBP4 OS=Homo sapiens OX=9606 GN=FKBP4 PE=1 SV=3	FKBP4	51.804	1.898	0.64	0.774			1.212	1.68	1.624			1.364	0.29816
Q9ULQ1	Two pore calcium channel protein 1 OS=Homo sapiens OX=9606 GN=TPCN1 PE=1 SV=3	TPCN1	94.146	0.869	1.588	1.116	1.709	1.226	0.915	2.56	1.289	0.372	0.77	0.907	0.45958
P31146	Coronin-1A OS=Homo sapiens OX=9606 GN=CORO1A PE=1 SV=4	CORO1A	51.026	1.048	1.041	0.52	3.479	0.573	1.996	0.482	1.861	1.346	0.908	0.99	0.76564
P61026	Ras-related protein Rab-10 OS=Homo sapiens OX=9606 GN=RAB10 PE=1 SV=1	RAB10	22.541	1.745	0.484	1.372	1.182	1.937	1.061	0.829	0.838	1.107	1.08	0.731	0.4351
O00299	Chloride intracellular channel protein 1 OS=Homo sapiens OX=9606 GN=CLIC1 PE=1 SV=4	CLIC1	26.922	1.226	0.962	3.083	2.061	3.082	1.437	0.506	1.102	1.225	0.772	0.484	0.053618
P11831	Serum response factor OS=Homo sapiens OX=9606 GN=SRF PE=1 SV=1	SRF	51.592				0.628	0.791				0.58	6.601	5.061	0.49114
Q9P2G1	Ankyrin repeat and IBR domain-containing protein 1 OS=Homo sapiens OX=9606 GN=ANKIB1 PE=1 SV=3	ANKIB1	122	1.145	0.852	1.639			1.595	1.284	0.377			0.895	0.6446
P13521	Secretogranin-2 OS=Homo sapiens OX=9606 GN=SCG2 PE=1 SV=2	SCG2	70.94	1.523	3.376	0.995	1.952	1.483	4.399	0.715	1.185	0.704	0.784	0.835	0.35406
Q8N8Y2	V-type proton ATPase subunit d 2 OS=Homo sapiens OX=9606 GN=ATP6V0D2 PE=2 SV=1	ATP6V0D2	40.426	1.06	0.87	0.965			0.886	0.903	1.287			1.063	0.73534
P0DJD9	Pepsin A-5 OS=Homo sapiens OX=9606 GN=PGA5 PE=1 SV=1	PGA5	41.993	2.208	1.646	0.78	0.857	0.323	1.38	1.362	0.538	0.3	0.265	0.661	0.37724
P0CG12	Decreased expression in renal and prostate cancer protein OS=Homo sapiens OX=9606 GN=DERPC PE=1 SV=1	DERPC	51.391	1.917	1.491	0.955			0.943	0.91	1.09			0.675	0.166042
A0A0J9YXX1	Immunoglobulin heavy variable 5-10-1 OS=Homo sapiens OX=9606 GN=IGHV5-10-1 PE=3 SV=1	IGHV5-10-1	12.772	0.327	0.449	0.355	1.568	9.96	3.514	0.272	1.534	1.136	0.753	0.569	0.91382
Q9Y5K6	CD2-associated protein OS=Homo sapiens OX=9606 GN=CD2AP PE=1 SV=1	CD2AP	71.45	1.753	1.421	2.017	0.862	1.077	0.756	0.514	0.863	0.84	1.217	0.588	0.03648
P21964	Catechol O-methyltransferase OS=Homo sapiens OX=9606 GN=COMT PE=1 SV=2	COMT	30.037	1.383	1.571	1.245	0.445	0.505	1.268	2.024	1.647	0.934	0.934	1.322	0.27592
Q9NZA1	Chloride intracellular channel protein 5 OS=Homo sapiens OX=9606 GN=CLIC5 PE=1 SV=3	CLIC5	46.502	1.582	0.955	1.911			1.272	1.295	2.238			1.08	0.784
Q86WA9	Sodium-independent sulfate anion transporter OS=Homo sapiens OX=9606 GN=SLC26A11 PE=2 SV=2	SLC26A11	65.298	1.566	1.404	2.408			0.932	0.851	0.882			0.496	0.0155384
O75131	Copine-3 OS=Homo sapiens OX=9606 GN=CPNE3 PE=1 SV=1	CPNE3	60.13	0.776	0.657	1.384	1.381	0.807	0.975	1.388	0.68	1.154	0.929	1.024	0.82274
O43301	Heat shock 70 kDa protein 12A OS=Homo sapiens OX=9606 GN=HSPA12A PE=1 SV=2	HSPA12A	74.977	1.489	1.578	0.882			0.532	1.613	0.874			0.764	0.412
P45381	Aspartoacylase OS=Homo sapiens OX=9606 GN=ASPA PE=1 SV=1	ASPA	35.735	1.338	0.866	0.712			0.834	1.187	0.695			0.931	0.81618
P27701	CD82 antigen OS=Homo sapiens OX=9606 GN=CD82 PE=1 SV=1	CD82	29.625	0.292	0.445	0.311			1.124	0.953	1.588			3.497	0.0033555
A0A0J9YX94	Paraneoplastic antigen Ma6F OS=Homo sapiens OX=9606 GN=PNMA6F PE=4 SV=1	PNMA6F	60.071				0.866	1.262				1.424	0.983	1.131	0.68558
Q6ZS17	Rho family-interacting cell polarization regulator 1 OS=Homo sapiens OX=9606 GN=RIPOR1 PE=1 SV=1	RIPOR1	132.31	1.343	1.046	1.909	1.022	2.541	1.326	1.015	0.865	1.014	0.513	0.602	0.072903
O94919	Endonuclease domain-containing 1 protein OS=Homo sapiens OX=9606 GN=ENDOD1 PE=1 SV=2	ENDOD1	55.016	1.018	3.848	0.963			1.066	1.679	0.782			0.605	0.54796
P05451	Lithostathine-1-alpha OS=Homo sapiens OX=9606 GN=REG1A PE=1 SV=3	REG1A	18.731	2.286	1.786	1.242			2.031	0.408	0.365			0.528	0.18174
Q9HD40	O-phosphoseryl-tRNA(Sec) selenium transferase OS=Homo sapiens OX=9606 GN=SEPSECS PE=1 SV=2	SEPSECS	55.726		0.116				2.023	3.53	0.301			16.822
P40763	Signal transducer and activator of transcription 3 OS=Homo sapiens OX=9606 GN=STAT3 PE=1 SV=2	STAT3	88.067	1.354	3.041	0.613			1.406	1.668	1.756			0.964	0.76022
P48745	CCN family member 3 OS=Homo sapiens OX=9606 GN=CCN3 PE=1 SV=1	CCN3	39.162	1.89	1.127	1.092	0.808	0.994	1.734	1.267	0.726	0.318	0.362	0.746	0.23632
P11233	Ras-related protein Ral-A OS=Homo sapiens OX=9606 GN=RALA PE=1 SV=1	RALA	23.567	0.507	0.562	0.969	1.505	2.615	0.979	1.282	1.121	0.94	1.097	0.88	0.86192
P28799	Progranulin OS=Homo sapiens OX=9606 GN=GRN PE=1 SV=2	GRN	63.544	1.738	0.727	1.371	1.197	1.073	0.942	1.021	1.188	0.978	0.779	0.804	0.27314
P09327	Villin-1 OS=Homo sapiens OX=9606 GN=VIL1 PE=1 SV=4	VIL1	92.694	1.351	0.954	1.511	0.841	2.554	1.085	1.523	0.64	1.265	0.643	0.715	0.26472
Q8N335	Glycerol-3-phosphate dehydrogenase 1-like protein OS=Homo sapiens OX=9606 GN=GPD1L PE=1 SV=1	GPD1L	38.418	1.778	1.39	0.749	0.782	0.795	0.981	1.287	1.087	0.937	0.786	0.924	0.89772
P50226	Sulfotransferase 1A2 OS=Homo sapiens OX=9606 GN=SULT1A2 PE=1 SV=2	SULT1A2	34.309				1.157	0.83				1.395	1.09	1.251	0.38234
Q9NSA0	Solute carrier family 22 member 11 OS=Homo sapiens OX=9606 GN=SLC22A11 PE=1 SV=1	SLC22A11	59.971	0.854	0.348	2.109			1.1	2.487	0.73			1.304	0.5745
P04066	Tissue alpha-L-fucosidase OS=Homo sapiens OX=9606 GN=FUCA1 PE=1 SV=4	FUCA1	53.688	0.589	1.368	1.641			0.351	0.822	1.461			0.732	0.5049
P05164	Myeloperoxidase OS=Homo sapiens OX=9606 GN=MPO PE=1 SV=1	MPO	83.868	0.504	0.632	0.415	3.405	0.574	7.571	0.538	0.593	1.168	0.749	1.92	0.51586
Q96FL8	Multidrug and toxin extrusion protein 1 OS=Homo sapiens OX=9606 GN=SLC47A1 PE=1 SV=1	SLC47A1	61.921	1.79	1.182	1.399	1.068	0.827	0.863	0.613	1.061	1.687	1.384	0.895	0.54692
Q92896	Golgi apparatus protein 1 OS=Homo sapiens OX=9606 GN=GLG1 PE=1 SV=2	GLG1	134.55	0.844	0.854	0.492	0.251	0.138	0.861	2.824	0.813	1.085	0.848	2.494	0.04682
P10153	Non-secretory ribonuclease OS=Homo sapiens OX=9606 GN=RNASE2 PE=1 SV=2	RNASE2	18.354	1.738	2.162	1.166	2.392	1.478	0.669	1.196	0.723	1.349	1.262	0.582	0.023384
Q9UL54	Serine/threonine-protein kinase TAO2 OS=Homo sapiens OX=9606 GN=TAOK2 PE=1 SV=2	TAOK2	138.25	1.26	1.187	1.189			0.868	0.775	0.846			0.685	0.00065779
O60701	UDP-glucose 6-dehydrogenase OS=Homo sapiens OX=9606 GN=UGDH PE=1 SV=1	UGDH	55.023	1.574	1.303	0.729	1.174	1.133	0.725	1.288	0.698	0.663	1.3	0.79	0.2392
Q9BZG1	Ras-related protein Rab-34 OS=Homo sapiens OX=9606 GN=RAB34 PE=1 SV=1	RAB34	29.044	1.348	2.18	0.952			1.369	0.777	0.871			0.673	0.28122
P31639	Sodium/glucose cotransporter 2 OS=Homo sapiens OX=9606 GN=SLC5A2 PE=1 SV=1	SLC5A2	72.896	1.527	0.979	0.927	0.564	0.773	0.786	1.009	0.96	0.593	1.59	1.035	0.88436
Q9UBD6	Ammonium transporter Rh type C OS=Homo sapiens OX=9606 GN=RHCG PE=1 SV=1	RHCG	53.178				0.726	0.743				1.535	0.528	1.404	0.76802
Q9UGT4	Sushi domain-containing protein 2 OS=Homo sapiens OX=9606 GN=SUSD2 PE=1 SV=1	SUSD2	90.207	2.065	1.428	1.93	1.182	1.208	1.368	0.321	0.344	1.025	0.999	0.519	0.040355
P0DMV9	Heat shock 70 kDa protein 1B OS=Homo sapiens OX=9606 GN=HSPA1B PE=1 SV=1	HSPA1B	70.051	0.722	0.678	1.055	1.23	1.126	1.674	0.83	1.064	1.584	1.172	1.314	0.168575
Q9HCU0	Endosialin OS=Homo sapiens OX=9606 GN=CD248 PE=1 SV=1	CD248	80.858				0.799	0.803				0.936	0.726	1.037	0.85846
P12277	Creatine kinase B-type OS=Homo sapiens OX=9606 GN=CKB PE=1 SV=1	CKB	42.644	1.386	3.999	0.767	0.475	0.356	0.753	1.484	0.657	0.976	0.25	0.59	0.60864
Q9ULY5	C-type lectin domain family 4 member E OS=Homo sapiens OX=9606 GN=CLEC4E PE=1 SV=1	CLEC4E	25.072				6.174	0.54				1.193	1.083	0.339	0.73494
O75558	Syntaxin-11 OS=Homo sapiens OX=9606 GN=STX11 PE=1 SV=1	STX11	33.195	1.302	0.94	1.857			4.162	0.789	0.596			1.353	0.94146
P08670	Vimentin OS=Homo sapiens OX=9606 GN=VIM PE=1 SV=4	VIM	53.651	1.212	0.877	0.502	1.082	0.403	6.243	0.735	0.962	1.301	0.933	2.496	0.193042
P24928	DNA-directed RNA polymerase II subunit RPB1 OS=Homo sapiens OX=9606 GN=POLR2A PE=1 SV=2	POLR2A	217.17	10.977	9.733	0.793			0.965	0.756	0.73			0.114	0.188702
P60900	Proteasome subunit alpha type-6 OS=Homo sapiens OX=9606 GN=PSMA6 PE=1 SV=1	PSMA6	27.399	1.077	1.04	0.522	0.959	0.497	3.1	1.293	1.951	1.628	1.348	2.276	0.0078607
Q5TC63	Growth hormone-regulated TBC protein 1 OS=Homo sapiens OX=9606 GN=GRTP1 PE=1 SV=4	GRTP1	38.553	1.485	1.407	1.531	0.679	1.152	0.901	0.775	1.036	1.281	1.455	0.871	0.53206
P23381	"Tryptophan--tRNA ligase, cytoplasmic OS=Homo sapiens OX=9606 GN=WARS PE=1 SV=2"	WARS	53.165	1.053	6.486	0.767			1.848	0.951	1.181			0.479	0.67926
Q96A22	Uncharacterized protein C11orf52 OS=Homo sapiens OX=9606 GN=C11orf52 PE=1 SV=2	C11orf52	13.92	1.19	0.491	1.203	0.904	1.376	0.697	0.891	0.931	0.968	0.736	0.818	0.46368
Q9HC84	Mucin-5B OS=Homo sapiens OX=9606 GN=MUC5B PE=1 SV=3	MUC5B	596.33	0.293	0.578	0.431	0.546	0.473	12.25	0.695		1.653	0.75	8.266	0.134323
P21266	Glutathione S-transferase Mu 3 OS=Homo sapiens OX=9606 GN=GSTM3 PE=1 SV=3	GSTM3	26.559	2.404	1.487	2.556	1.042	1.048	1.016	0.702	0.813	0.872	0.277	0.431	0.022081
P61088	Ubiquitin-conjugating enzyme E2 N OS=Homo sapiens OX=9606 GN=UBE2N PE=1 SV=1	UBE2N	17.138	0.778	0.468	1.211	1.162	1.392	1.08	1.584	1.12	1.024	1.284	1.216	0.27018
P54725	UV excision repair protein RAD23 homolog A OS=Homo sapiens OX=9606 GN=RAD23A PE=1 SV=1	RAD23A	39.609	1.704	1.02	1.219			1.308	0.955	0.653			0.74	0.27356
Q92859	Neogenin OS=Homo sapiens OX=9606 GN=NEO1 PE=1 SV=2	NEO1	160.01	1.085	1.45	1.109			1.21	0.609	0.902			0.747	0.2169
Q96TA1	Protein Niban 2 OS=Homo sapiens OX=9606 GN=NIBAN2 PE=1 SV=3	NIBAN2	84.137	0.894	1.179	1.22	0.755	2.618	1.52	1.078	1.439	0.874	0.886	0.87	0.79258
P30626	Sorcin OS=Homo sapiens OX=9606 GN=SRI PE=1 SV=1	SRI	21.676	0.692	0.894	0.954	0.746	0.911	0.981	2.817	0.939	0.996	0.727	1.539	0.27192
P14151	L-selectin OS=Homo sapiens OX=9606 GN=SELL PE=1 SV=2	SELL	42.187				1.942	0.794				0.867	0.916	0.652	0.53616
Q5T0Z8	Uncharacterized protein C6orf132 OS=Homo sapiens OX=9606 GN=C6orf132 PE=1 SV=4	C6orf132	124.03	0.917	1.936	1.727	1.115	2.747	1.882	0.659	1.515	1.445	0.748	0.74	0.31578
Q13153	Serine/threonine-protein kinase PAK 1 OS=Homo sapiens OX=9606 GN=PAK1 PE=1 SV=2	PAK1	60.646	1.17	1.732	0.59	1.182	0.81	1.036	1.314	0.684	1.179	1.32	1.009	0.8358
P09923	Intestinal-type alkaline phosphatase OS=Homo sapiens OX=9606 GN=ALPI PE=1 SV=2	ALPI	56.811	0.846	1.369	0.697			0.32	2.092	2.58			1.714	0.7331
Q6ZVX7	F-box only protein 50 OS=Homo sapiens OX=9606 GN=NCCRP1 PE=1 SV=1	NCCRP1	30.847	1.918	2.284	2.748			1.326	0.67	0.942			0.423	0.0162627
Q9BTU6	Phosphatidylinositol 4-kinase type 2-alpha OS=Homo sapiens OX=9606 GN=PI4K2A PE=1 SV=1	PI4K2A	54.022	0.963	1.468	0.759	0.581	0.524	0.988	1.092	0.921	0.705	1.73	1.266	0.29942
P62993	Growth factor receptor-bound protein 2 OS=Homo sapiens OX=9606 GN=GRB2 PE=1 SV=1	GRB2	25.206	1.47	0.714	1.188	1.246	1.396	1.734	1.161	0.91	1.078	0.769	0.94	0.71416
P16070	CD44 antigen OS=Homo sapiens OX=9606 GN=CD44 PE=1 SV=3	CD44	81.537	0.929	0.937	0.851	0.84	0.758	1.63	0.967	0.83	0.396	0.533	1.01	0.68784
P28838	Cytosol aminopeptidase OS=Homo sapiens OX=9606 GN=LAP3 PE=1 SV=3	LAP3	56.166	1.193	1.038	0.976	0.458	0.801	0.716	1.037	1.233	0.986	1.437	1.211	0.32402
Q86XT2	Vacuolar protein sorting-associated protein 37D OS=Homo sapiens OX=9606 GN=VPS37D PE=1 SV=2	VPS37D	27.729	3.254	1.149	2.573	0.908	1.38	1.059	0.67	0.746	1.156	0.798	0.478	0.041436
Q08752	Peptidyl-prolyl cis-trans isomerase D OS=Homo sapiens OX=9606 GN=PPID PE=1 SV=3	PPID	40.763				0.851	1.135				0.354	0.522	0.441	0.075863
Q9UN37	Vacuolar protein sorting-associated protein 4A OS=Homo sapiens OX=9606 GN=VPS4A PE=1 SV=1	VPS4A	48.897	1.569	0.595	1.131	0.608	0.74	0.701	0.969	0.986	0.892	1.276	1.039	0.66752
Q15654	Thyroid receptor-interacting protein 6 OS=Homo sapiens OX=9606 GN=TRIP6 PE=1 SV=3	TRIP6	50.287				1.307	1.962				1.3	0.573	0.573	0.309
P38606	V-type proton ATPase catalytic subunit A OS=Homo sapiens OX=9606 GN=ATP6V1A PE=1 SV=2	ATP6V1A	68.303	0.608	1.518	0.684	0.65	0.733	0.732	1.733	1.794	0.689	0.567	1.315	0.48564
O60637	Tetraspanin-3 OS=Homo sapiens OX=9606 GN=TSPAN3 PE=2 SV=1	TSPAN3	28.017	0.492	0.265	0.689	1.206	1.278	1.8	0.804	0.348	0.552	1.232	1.205	0.67174
Q96RW7	Hemicentin-1 OS=Homo sapiens OX=9606 GN=HMCN1 PE=1 SV=2	HMCN1	613.38	9.474	1.701	1.57			1.024	0.529	1.003			0.201	0.109902
O43795	Unconventional myosin-Ib OS=Homo sapiens OX=9606 GN=MYO1B PE=1 SV=3	MYO1B	131.98	1.179	1.067	1.682	0.968	2.4	0.942	0.634	1.04	0.744	0.641	0.548	0.020681
Q15599	Na(+)/H(+) exchange regulatory cofactor NHE-RF2 OS=Homo sapiens OX=9606 GN=SLC9A3R2 PE=1 SV=2	SLC9A3R2	37.413	1.435	1.103	1.075	1.237	1.175	1.502	1.701	1.482	1.283	0.937	1.146	0.31748
O95989	Diphosphoinositol polyphosphate phosphohydrolase 1 OS=Homo sapiens OX=9606 GN=NUDT3 PE=1 SV=1	NUDT3	19.471	1.063	1.564	1.276			2.145	0.573	1.14			0.988	0.7453
Q9H0A8	COMM domain-containing protein 4 OS=Homo sapiens OX=9606 GN=COMMD4 PE=1 SV=1	COMMD4	21.764	0.844	0.943	0.731			0.943	1.067	0.691			1.073	0.71016
Q03403	Trefoil factor 2 OS=Homo sapiens OX=9606 GN=TFF2 PE=1 SV=2	TFF2	14.284	1.485	1.173	1.022			0.952	2.22	0.587			1.021	0.78044
P06733	Alpha-enolase OS=Homo sapiens OX=9606 GN=ENO1 PE=1 SV=2	ENO1	47.168	0.656	0.608	0.956	1.081	0.96	1.034	1.02	1.101	0.92	1.023	1.196	0.16098
Q8N1F8	Serine/threonine-protein kinase 11-interacting protein OS=Homo sapiens OX=9606 GN=STK11IP PE=1 SV=4	STK11IP	120.26	1.369	1.716	1.861			0.93	1.201	1.806			0.796	0.29464
P09960	Leukotriene A-4 hydrolase OS=Homo sapiens OX=9606 GN=LTA4H PE=1 SV=2	LTA4H	69.284	0.827	1.928	0.716	1.208	0.763	2.146	1.16	1.741	1.194	1.173	1.362	0.156744
Q32M45	Anoctamin-4 OS=Homo sapiens OX=9606 GN=ANO4 PE=2 SV=1	ANO4	111.46	12.002	1.932	1.962			0.906	0.569	0.682			0.136	0.05946
P11226	Mannose-binding protein C OS=Homo sapiens OX=9606 GN=MBL2 PE=1 SV=2	MBL2	26.143	0.164	0.277	0.194	0.524	0.853	0.281	0.137	0.22	0.398	5.37	3.184	0.68098
P08962	CD63 antigen OS=Homo sapiens OX=9606 GN=CD63 PE=1 SV=2	CD63	25.636	0.589	0.461	0.58	0.595	0.4	1.963	1.625	1.005	1.793	1.133	2.864	0.000156263
P02787	Serotransferrin OS=Homo sapiens OX=9606 GN=TF PE=1 SV=3	TF	77.063	0.625	0.551	0.328	0.793	0.338	1.241	0.451	4.885	0.906	1.498	3.408	0.053902
O43639	Cytoplasmic protein NCK2 OS=Homo sapiens OX=9606 GN=NCK2 PE=1 SV=2	NCK2	42.915	1.128	0.926	1.547	1.898	2.719	1.521	0.953	1.188	0.799	0.93	0.656	0.127722
P10909	Clusterin OS=Homo sapiens OX=9606 GN=CLU PE=1 SV=1	CLU	52.494	0.624	0.658	0.404	0.511	0.468	0.296	0.956	3.235	1.565	1.245	2.738	0.130137
Q9UHI5	Large neutral amino acids transporter small subunit 2 OS=Homo sapiens OX=9606 GN=SLC7A8 PE=1 SV=1	SLC7A8	58.381	0.686	0.962	0.451	1.016	0.842	1.072	2.512	0.483	0.532	0.575	1.308	0.80112
P23284	Peptidyl-prolyl cis-trans isomerase B OS=Homo sapiens OX=9606 GN=PPIB PE=1 SV=2	PPIB	23.742	0.616	1.522	0.37	0.963	0.539	1.606	1.051	2.432	1.579	1.516	2.041	0.020702
P01111	GTPase NRas OS=Homo sapiens OX=9606 GN=NRAS PE=1 SV=1	NRAS	21.229				1.737	1.811				0.927	1.022	0.549	0.0077237
Q14314	Fibroleukin OS=Homo sapiens OX=9606 GN=FGL2 PE=1 SV=1	FGL2	50.228	0.737	1.491	0.416	0.583	0.566	0.476	2.265	2.142	1.329	0.799	1.848	0.166936
P46952	"3-hydroxyanthranilate 3,4-dioxygenase OS=Homo sapiens OX=9606 GN=HAAO PE=1 SV=2"	HAAO	32.556	2.231	0.672	0.995	1.06	0.759	1.457	1.77	0.774	1.119	1.221	1.109	0.5313
A0A140G945	Alpha-crystallin A2 chain OS=Homo sapiens OX=9606 GN=CRYAA2 PE=1 SV=1	CRYAA2	19.909	1.985	2.698	1.585	0.888	0.937	0.919	1.093	0.286	0.098	0.582	0.368	0.038483
Q07960	Rho GTPase-activating protein 1 OS=Homo sapiens OX=9606 GN=ARHGAP1 PE=1 SV=1	ARHGAP1	50.435	0.982	0.87	2.642	1.567	1.334	2.352	0.205	0.101	0.232	0.289	0.43	0.032878
P13716	Delta-aminolevulinic acid dehydratase OS=Homo sapiens OX=9606 GN=ALAD PE=1 SV=1	ALAD	36.294				0.474	0.705				1.431	1.334	2.345	0.049576
P0DP03	Immunoglobulin heavy variable 3-30-5 OS=Homo sapiens OX=9606 GN=IGHV3-30-5 PE=3 SV=1	IGHV3-30-5	12.947	0.519	0.498	0.512	1.645	1.882	2.234	0.66	5.253	1.294	0.474	1.961	0.37984
A0A075B6I9	Immunoglobulin lambda variable 7-46 OS=Homo sapiens OX=9606 GN=IGLV7-46 PE=3 SV=4	IGLV7-46	12.468	0.468	0.566	0.703	0.396	0.641	0.881	0.836	3.016	0.834	3.857	3.397	0.048717
O43242	26S proteasome non-ATPase regulatory subunit 3 OS=Homo sapiens OX=9606 GN=PSMD3 PE=1 SV=2	PSMD3	60.977	0.875	1.125	0.481			0.429	1.211	2.176			1.538	0.61804
P10451	Osteopontin OS=Homo sapiens OX=9606 GN=SPP1 PE=1 SV=1	SPP1	35.422	0.867	1.653	1.065	0.849	0.486	0.769	0.654	0.885	0.559	0.77	0.739	0.29598
Q14118	Dystroglycan OS=Homo sapiens OX=9606 GN=DAG1 PE=1 SV=2	DAG1	97.44	0.996	1.068	0.717			0.783	1.093	0.673			0.917	0.6459
P11047	Laminin subunit gamma-1 OS=Homo sapiens OX=9606 GN=LAMC1 PE=1 SV=3	LAMC1	177.6	3.57	4.692	0.76			1.186	1.257	0.683			0.346	0.23264
Q8NI35	InaD-like protein OS=Homo sapiens OX=9606 GN=PATJ PE=1 SV=3	PATJ	196.37	1.165	1.206	1.378	1.142	1.719	1.081	1.008	0.957	0.963	0.831	0.732	0.0084807
P02686	Myelin basic protein OS=Homo sapiens OX=9606 GN=MBP PE=1 SV=3	MBP	33.117	2.198	2.707	1.971	8.832	15.146	0.789	0.351	0.108			0.067	0.0087438
Q9HD43	Receptor-type tyrosine-protein phosphatase H OS=Homo sapiens OX=9606 GN=PTPRH PE=1 SV=4	PTPRH	122.35				2.086	3.682				0.714	1.497	0.383	0.168939
Q14624	Inter-alpha-trypsin inhibitor heavy chain H4 OS=Homo sapiens OX=9606 GN=ITIH4 PE=1 SV=4	ITIH4	103.36	0.172	0.213		0.329	0.303	1.607	1.558	1.785	1.329	1.428	6.063	2.2768e-06
O15439	Multidrug resistance-associated protein 4 OS=Homo sapiens OX=9606 GN=ABCC4 PE=1 SV=3	ABCC4	149.52	1.262	0.825	1.031			0.804	1.177	0.582			0.822	0.40232
P35321	Cornifin-A OS=Homo sapiens OX=9606 GN=SPRR1A PE=1 SV=2	SPRR1A	9.8774	0.947	1.582	1.233	1.091	1.92	3.03	0.43	0.343	0.938	0.788	0.816	0.25524
P22694	cAMP-dependent protein kinase catalytic subunit beta OS=Homo sapiens OX=9606 GN=PRKACB PE=1 SV=2	PRKACB	40.622	0.48	2.84	0.599			0.468	0.891	0.762			0.541	0.62324
Q16827	Receptor-type tyrosine-protein phosphatase O OS=Homo sapiens OX=9606 GN=PTPRO PE=1 SV=2	PTPRO	138.34	0.469	0.545	0.895			0.571	1.515	1.478			1.867	0.20172
Q6UWE0	E3 ubiquitin-protein ligase LRSAM1 OS=Homo sapiens OX=9606 GN=LRSAM1 PE=1 SV=1	LRSAM1	83.593	0.854	1.639	0.899			0.713	1.313	0.904			0.864	0.65524
P05556	Integrin beta-1 OS=Homo sapiens OX=9606 GN=ITGB1 PE=1 SV=2	ITGB1	88.414	0.855	0.829	0.429	1.299	0.593	0.925	2.026	1.064	1.07	0.938	1.504	0.10698
O15144	Actin-related protein 2/3 complex subunit 2 OS=Homo sapiens OX=9606 GN=ARPC2 PE=1 SV=1	ARPC2	34.333	0.846	0.63	1.793	0.806	0.576	0.555	0.218	1.613	0.727	1.486	0.989	0.73018
P48739	Phosphatidylinositol transfer protein beta isoform OS=Homo sapiens OX=9606 GN=PITPNB PE=1 SV=2	PITPNB	31.54	2.025	1.284	1.016	1.095	0.899	0.834	1.306	0.774	0.848	0.838	0.728	0.121096
P52788	Spermine synthase OS=Homo sapiens OX=9606 GN=SMS PE=1 SV=2	SMS	41.268	1.048	0.726	0.677	0.738	0.615	1.081	1.512	0.815	1.185	1.206	1.524	0.0143629
P35613	Basigin OS=Homo sapiens OX=9606 GN=BSG PE=1 SV=2	BSG	42.2	1.562	1.405	0.885	1.35	0.894	1.11	2.053	0.81	1.912	1.01	1.131	0.71148
P29966	Myristoylated alanine-rich C-kinase substrate OS=Homo sapiens OX=9606 GN=MARCKS PE=1 SV=4	MARCKS	31.554	1.214	5.402	2.175	1.03	2.484	1.891	0.681	0.765	0.987	0.595	0.4	0.049256
O95954	Formimidoyltransferase-cyclodeaminase OS=Homo sapiens OX=9606 GN=FTCD PE=1 SV=2	FTCD	58.926	0.274	0.818	0.493	0.454	0.405	0.414	1.203	1.528	0.662	1.397	2.129	0.049015
P02763	Alpha-1-acid glycoprotein 1 OS=Homo sapiens OX=9606 GN=ORM1 PE=1 SV=1	ORM1	23.511	0.401	0.453	0.272	0.572	0.331	3.595	1.585	0.765	0.698	1.409	3.968	0.005176
Q9NXU5	ADP-ribosylation factor-like protein 15 OS=Homo sapiens OX=9606 GN=ARL15 PE=1 SV=1	ARL15	22.876	1.254	0.987	1.719			0.695	0.966	0.686			0.593	0.059757
P49721	Proteasome subunit beta type-2 OS=Homo sapiens OX=9606 GN=PSMB2 PE=1 SV=1	PSMB2	22.836	0.787	1.443	0.473			0.926	0.772	1.18			1.065	0.6853
P13861	cAMP-dependent protein kinase type II-alpha regulatory subunit OS=Homo sapiens OX=9606 GN=PRKAR2A PE=1 SV=2	PRKAR2A	45.518	1.613	1.786	1.557	2.175	2.117	0.974	1.167	0.703	0.911	1.053	0.52	0.00031843
Q6VY07	Phosphofurin acidic cluster sorting protein 1 OS=Homo sapiens OX=9606 GN=PACS1 PE=1 SV=2	PACS1	104.9	1.133	2.497	0.994	1.158	1.567	2.746				0.728	1.182	0.96538
P62328	Thymosin beta-4 OS=Homo sapiens OX=9606 GN=TMSB4X PE=1 SV=2	TMSB4X	5.0526	4.237	2.952	3.008	10.093	4.114	0.807	0.362	0.442	0.3	0.4	0.095	3.7461e-05
P19971	Thymidine phosphorylase OS=Homo sapiens OX=9606 GN=TYMP PE=1 SV=2	TYMP	49.955				1.667	2.22				1.015	0.753	0.455	0.062441
A0PK05	Transmembrane protein 72 OS=Homo sapiens OX=9606 GN=TMEM72 PE=2 SV=1	TMEM72	29.89	1.305	1.513	1.298			0.478	0.927	1.094			0.607	0.097718
P48048	ATP-sensitive inward rectifier potassium channel 1 OS=Homo sapiens OX=9606 GN=KCNJ1 PE=1 SV=1	KCNJ1	44.794	0.881	0.952	1.223	0.647	0.571	1.08	1.493	1.35	1.449	0.734	1.429	0.093443
P09543	"2',3'-cyclic-nucleotide 3'-phosphodiesterase OS=Homo sapiens OX=9606 GN=CNP PE=1 SV=2"	CNP	47.578	1.596	0.685	1.452	0.853	1.008	1.151	1.036	0.854	1.023	1.069	0.918	0.81912
P01031	Complement C5 OS=Homo sapiens OX=9606 GN=C5 PE=1 SV=4	C5	188.3	0.718	0.683	0.459	0.548	0.453	0.519	0.325	4.387	0.743	2.672	3.022	0.2647
Q99592	Zinc finger and BTB domain-containing protein 18 OS=Homo sapiens OX=9606 GN=ZBTB18 PE=1 SV=1	ZBTB18	58.354	0.628	0.459	0.26					8.984			20.009
Q8TF74	WAS/WASL-interacting protein family member 2 OS=Homo sapiens OX=9606 GN=WIPF2 PE=1 SV=1	WIPF2	46.288	1.776	1.504	1.82	2.644	2.916	0.756	0.483	0.394	0.817	1.107	0.334	0.00101715
Q7Z404	Transmembrane channel-like protein 4 OS=Homo sapiens OX=9606 GN=TMC4 PE=2 SV=3	TMC4	79.207	0.634	1.438	1.796	2.94	2.783	2.313	0.644	0.818	0.772	0.605	0.537	0.126203
O95433	Activator of 90 kDa heat shock protein ATPase homolog 1 OS=Homo sapiens OX=9606 GN=AHSA1 PE=1 SV=1	AHSA1	38.274	1.641	1.988	1.221			0.801	0.894	0.809			0.516	0.0116843
P59646	FXYD domain-containing ion transport regulator 4 OS=Homo sapiens OX=9606 GN=FXYD4 PE=3 SV=2	FXYD4	9.3729					1.144					1.005	0.878
P30046	D-dopachrome decarboxylase OS=Homo sapiens OX=9606 GN=DDT PE=1 SV=3	DDT	12.712				1.568	1.131				1.236	1.013	0.833	0.45886
Q9Y5X3	Sorting nexin-5 OS=Homo sapiens OX=9606 GN=SNX5 PE=1 SV=1	SNX5	46.816	0.699	0.843	0.456	0.807	0.696	1.018	2.018	0.825	0.842	1.122	1.664	0.042164
Q13938	Calcyphosin OS=Homo sapiens OX=9606 GN=CAPS PE=1 SV=2	CAPS	30.24	1.331	0.749	1.368	0.833	1.984	0.744	0.714	0.839	1	0.842	0.661	0.092256
P07306	Asialoglycoprotein receptor 1 OS=Homo sapiens OX=9606 GN=ASGR1 PE=1 SV=2	ASGR1	33.186				0.885	0.752				0.643	0.335	0.597	0.23524
P61916	NPC intracellular cholesterol transporter 2 OS=Homo sapiens OX=9606 GN=NPC2 PE=1 SV=1	NPC2	16.57	1.048	0.589	2.311	0.934	0.665	1.308	1.304	1.429	1.195	0.933	1.112	0.42214
Q93045	Stathmin-2 OS=Homo sapiens OX=9606 GN=STMN2 PE=1 SV=3	STMN2	20.828	1.115	1.137	1.154			2.245	0.387	0.76			0.996	0.65618
Q6UXG3	CMRF35-like molecule 9 OS=Homo sapiens OX=9606 GN=CD300LG PE=1 SV=2	CD300LG	36.06	1.746	0.407	0.417			0.529	1.357	0.919			1.091	0.65506
P11717	Cation-independent mannose-6-phosphate receptor OS=Homo sapiens OX=9606 GN=IGF2R PE=1 SV=3	IGF2R	274.37				1.951	0.444				2.293	1.314	1.506	0.51318
Q8TF65	PDZ domain-containing protein GIPC2 OS=Homo sapiens OX=9606 GN=GIPC2 PE=1 SV=1	GIPC2	34.354	0.873	0.696	0.685	1.577	0.828	0.841	2.62	0.622	0.651	0.983	1.227	0.75952
Q9BUF7	Protein crumbs homolog 3 OS=Homo sapiens OX=9606 GN=CRB3 PE=1 SV=3	CRB3	12.854	1.143	1.484	1.08	0.729	1.016	1.023	1.204	1.348	0.928	0.86	0.984	0.97402
P63167	"Dynein light chain 1, cytoplasmic OS=Homo sapiens OX=9606 GN=DYNLL1 PE=1 SV=1"	DYNLL1	10.366	1.8	3.229	2.42				0.725				0.292
P40227	T-complex protein 1 subunit zeta OS=Homo sapiens OX=9606 GN=CCT6A PE=1 SV=3	CCT6A	58.024				0.353	0.438				0.72	1.286	2.536	0.101645
Q6P1M3	LLGL scribble cell polarity complex component 2 OS=Homo sapiens OX=9606 GN=LLGL2 PE=1 SV=2	LLGL2	113.45	1.01	1.26	0.6			0.717	2.242	0.663			1.262	0.81744
P49368	T-complex protein 1 subunit gamma OS=Homo sapiens OX=9606 GN=CCT3 PE=1 SV=4	CCT3	60.533	0.55	1.097	0.53	0.993	1.029	2.255	1.226	1.684	1.125	1.408	1.833	0.0154391
P50135	Histamine N-methyltransferase OS=Homo sapiens OX=9606 GN=HNMT PE=1 SV=1	HNMT	33.295	0.938	1.758	0.534	0.557	0.84	0.878	1.722	0.859	0.68	0.902	1.089	0.63352
Q9UBQ7	Glyoxylate reductase/hydroxypyruvate reductase OS=Homo sapiens OX=9606 GN=GRHPR PE=1 SV=1	GRHPR	35.668	1.345	2.661	0.994			0.488	1.176	1.284			0.59	0.284
O95497	Pantetheinase OS=Homo sapiens OX=9606 GN=VNN1 PE=1 SV=2	VNN1	57.011	1.224	0.766	1.452	2.569	0.834	1.496	1.047	2.21	1.693	0.463	1.009	0.96778
Q13277	Syntaxin-3 OS=Homo sapiens OX=9606 GN=STX3 PE=1 SV=3	STX3	33.155	0.809	2.951	0.743			1.465	1.137	0.909			0.78	0.9155
P04196	Histidine-rich glycoprotein OS=Homo sapiens OX=9606 GN=HRG PE=1 SV=1	HRG	59.578	1.267	0.906	0.43	0.528	0.236	0.686	0.43	8.548	0.42	1.362	3.399	0.34752
P26038	Moesin OS=Homo sapiens OX=9606 GN=MSN PE=1 SV=3	MSN	67.819	1.145	1.171	1.163	1.448	1.639	0.985	0.886	0.919	1.298	0.813	0.746	0.025482
P14384	Carboxypeptidase M OS=Homo sapiens OX=9606 GN=CPM PE=1 SV=2	CPM	50.513	1.117	0.592	1.81	0.548	3.103	1.238	1.329	0.874	1.211	0.76	0.755	0.81092
A0A0A0MT36	Immunoglobulin kappa variable 6D-21 OS=Homo sapiens OX=9606 GN=IGKV6D-21 PE=3 SV=1	IGKV6D-21	12.34	1.447	1.139	0.992			11.042	0.859	0.425			3.445	0.79108
Q9Y6N9	Harmonin OS=Homo sapiens OX=9606 GN=USH1C PE=1 SV=3	USH1C	62.21				0.805	2.053				0.694	0.975	0.584	0.46458
Q96QK1	Vacuolar protein sorting-associated protein 35 OS=Homo sapiens OX=9606 GN=VPS35 PE=1 SV=2	VPS35	91.706	1.799	1.648	1.07	0.792	1.188	1.052	0.715	1.358	0.577	0.536	0.652	0.08912
Q9ULR3	Protein phosphatase 1H OS=Homo sapiens OX=9606 GN=PPM1H PE=1 SV=2	PPM1H	56.447	2.07	0.887	1.364	1.467	1.202	1.388	1.042	0.666	0.683	0.975	0.68	0.083217
Q8TAF3	WD repeat-containing protein 48 OS=Homo sapiens OX=9606 GN=WDR48 PE=1 SV=1	WDR48	76.21	1.154	1.654	1.143	0.554	0.594	1.742	1.26	1.036	1.186	0.957	1.212	0.30772
P02675	Fibrinogen beta chain OS=Homo sapiens OX=9606 GN=FGB PE=1 SV=2	FGB	55.928	0.818	0.806	0.473	0.471	0.478	0.551	0.441	3.451	0.677	1.717	2.245	0.23468
Q8N5I2	Arrestin domain-containing protein 1 OS=Homo sapiens OX=9606 GN=ARRDC1 PE=1 SV=1	ARRDC1	45.981	0.92	0.81	0.997	1.257	1.547	1.188	1.059	1.125	1.035	0.851	0.951	0.82446
P11678	Eosinophil peroxidase OS=Homo sapiens OX=9606 GN=EPX PE=1 SV=2	EPX	81.04	0.48	0.588	0.195	0.49	0.468	0.411	0.704	2.822	0.4	2.524	3.089	0.113797
Q9NS23	Ras association domain-containing protein 1 OS=Homo sapiens OX=9606 GN=RASSF1 PE=1 SV=1	RASSF1	39.219	0.065	0.354	0.059			0.051	0.952	0.583			3.318	0.39996
O60308	Centrosomal protein of 104 kDa OS=Homo sapiens OX=9606 GN=CEP104 PE=1 SV=1	CEP104	104.45	1.231	1.293	1.6	0.413	0.775	0.487	0.988	1.578	1.334	1.475	1.104	0.71794
P98161	Polycystin-1 OS=Homo sapiens OX=9606 GN=PKD1 PE=1 SV=3	PKD1	462.52	1.678	0.858	0.822	0.832	0.972	0.705	1.268	1.237	1.204	1.033	1.055	0.68722
A0AVF1	Intraflagellar transport protein 56 OS=Homo sapiens OX=9606 GN=TTC26 PE=2 SV=1	TTC26	64.177	1.219	1.509	0.738			0.556	1.04	0.683			0.658	0.21674
P19823	Inter-alpha-trypsin inhibitor heavy chain H2 OS=Homo sapiens OX=9606 GN=ITIH2 PE=1 SV=2	ITIH2	106.46	0.947	1.106	0.414	0.394	0.294	0.662	0.481	5.859	0.689	2.263	3.155	0.169362
O00337	Sodium/nucleoside cotransporter 1 OS=Homo sapiens OX=9606 GN=SLC28A1 PE=1 SV=2	SLC28A1	71.583	1.254	1.014	0.864	0.502	0.631	0.682	1.203	0.724	0.771	2.019	1.266	0.47844
P51153	Ras-related protein Rab-13 OS=Homo sapiens OX=9606 GN=RAB13 PE=1 SV=1	RAB13	22.774	1.322	2.54	1.558	1.074	2.134	1.034	0.515	0.788	1.052	1.169	0.528	0.0192035
Q86X29	Lipolysis-stimulated lipoprotein receptor OS=Homo sapiens OX=9606 GN=LSR PE=1 SV=4	LSR	71.438	1.294	1.855	0.984	1.101	1.075	1.033	1.835	1.711	0.867	0.999	1.022	0.99604
Q8NG11	Tetraspanin-14 OS=Homo sapiens OX=9606 GN=TSPAN14 PE=1 SV=1	TSPAN14	30.69	0.705	0.617	0.266	2.382	0.388	3.724	0.897	0.901	1.886	1.353	2.01	0.098202
O15551	Claudin-3 OS=Homo sapiens OX=9606 GN=CLDN3 PE=1 SV=1	CLDN3	23.318	0.906	1.14	0.944			1.134	1.224	1.277	1.814	1.55	1.404	0.039241
Q00325	"Phosphate carrier protein, mitochondrial OS=Homo sapiens OX=9606 GN=SLC25A3 PE=1 SV=2"	SLC25A3	40.094	0.602	0.847	6.333	0.864	0.937	0.962	0.471	0.695	1.926	0.694	0.495	0.47032
P10599	Thioredoxin OS=Homo sapiens OX=9606 GN=TXN PE=1 SV=3	TXN	11.737	1.435	1.551	0.74	1.138	1.141	1.691	0.617	0.922	1.132	0.923	0.88	0.48962
Q9H098	Protein FAM107B OS=Homo sapiens OX=9606 GN=FAM107B PE=1 SV=1	FAM107B	15.558	1.603	1.303	1.642			1.158	0.529	1.582			0.719	0.27576
P53621	Coatomer subunit alpha OS=Homo sapiens OX=9606 GN=COPA PE=1 SV=2	COPA	138.34	0.953	0.478	0.793			0.602	1.329	1.732			1.647	0.30208
K7EJ46	Small integral membrane protein 22 OS=Homo sapiens OX=9606 GN=SMIM22 PE=1 SV=2	SMIM22	9.2487	0.716	1.167	1.494				0.92	0.746			0.74	0.43228
Q9NTK5	Obg-like ATPase 1 OS=Homo sapiens OX=9606 GN=OLA1 PE=1 SV=2	OLA1	44.743	1.362	2.437	1.183	0.979	1.016	0.95	1.406	1.442	0.736	0.919	0.782	0.32742
Q9H2D6	TRIO and F-actin-binding protein OS=Homo sapiens OX=9606 GN=TRIOBP PE=1 SV=3	TRIOBP	261.37	0.946	0.868	0.825			1.842	0.96	1.351			1.574	0.094359
Q99996	A-kinase anchor protein 9 OS=Homo sapiens OX=9606 GN=AKAP9 PE=1 SV=4	AKAP9	452.98	3.858	4.485	0.845			0.581	1.973	0.63			0.347	0.20516
Q9H9H4	Vacuolar protein sorting-associated protein 37B OS=Homo sapiens OX=9606 GN=VPS37B PE=1 SV=1	VPS37B	31.307	1.189	0.832	1.311	1.044	1.336	1.307	1.265	1.389	1.583	1.324	1.202	0.075238
P48169	Gamma-aminobutyric acid receptor subunit alpha-4 OS=Homo sapiens OX=9606 GN=GABRA4 PE=2 SV=2	GABRA4	61.622	0.777	0.672	0.385			0.704	2.3	1.414			2.409	0.115676
P50502	Hsc70-interacting protein OS=Homo sapiens OX=9606 GN=ST13 PE=1 SV=2	ST13	41.331	1.136	0.701	1.014			0.746	1.344	0.75			0.996	0.92708
Q9Y5K8	V-type proton ATPase subunit D OS=Homo sapiens OX=9606 GN=ATP6V1D PE=1 SV=1	ATP6V1D	28.262				1.78	0.778				1.057	0.722	0.695	0.58028
Q12798	Centrin-1 OS=Homo sapiens OX=9606 GN=CETN1 PE=1 SV=1	CETN1	19.57	1.012	0.793	0.644			0.72	0.992	0.66			0.969	0.87302
Q9Y266	Nuclear migration protein nudC OS=Homo sapiens OX=9606 GN=NUDC PE=1 SV=1	NUDC	38.242				1.019	0.971				1.313	1.586	1.457	0.0623
P61604	"10 kDa heat shock protein, mitochondrial OS=Homo sapiens OX=9606 GN=HSPE1 PE=1 SV=2"	HSPE1	10.932				1.141	0.752				1.358	1.755	1.644	0.172156
Q9NP79	Vacuolar protein sorting-associated protein VTA1 homolog OS=Homo sapiens OX=9606 GN=VTA1 PE=1 SV=1	VTA1	33.879	0.767	0.665	0.942	0.741	0.844	0.773	1.51	1.251	0.959	0.978	1.382	0.048057
P02647	Apolipoprotein A-I OS=Homo sapiens OX=9606 GN=APOA1 PE=1 SV=1	APOA1	30.777	0.784	0.721	0.29	0.796	0.534	0.36	0.297	5.989	0.819	1.757	2.951	0.40174
P07948	Tyrosine-protein kinase Lyn OS=Homo sapiens OX=9606 GN=LYN PE=1 SV=3	LYN	58.573	1.31	0.65	1.655	1.292	2.621	2.197	0.734	1.014	0.471	0.719	0.682	0.24332
P40121	Macrophage-capping protein OS=Homo sapiens OX=9606 GN=CAPG PE=1 SV=2	CAPG	38.498	1.362	1.369	1.672	1.503	1.869	1.903	0.726	0.793	1.26	0.444	0.659	0.106119
P60484	"Phosphatidylinositol 3,4,5-trisphosphate 3-phosphatase and dual-specificity protein phosphatase PTEN OS=Homo sapiens OX=9606 GN=PTEN PE=1 SV=1"	PTEN	47.166				1.166	0.916				0.776	0.938	0.823	0.3379
P28066	Proteasome subunit alpha type-5 OS=Homo sapiens OX=9606 GN=PSMA5 PE=1 SV=3	PSMA5	26.411	0.79	2.291	0.38	0.394	0.435	2.463	1.378	1.621	1.247	1.267	1.859	0.045537
O75631	Uroplakin-3a OS=Homo sapiens OX=9606 GN=UPK3A PE=1 SV=3	UPK3A	30.669	1.569	1.753	7.988	0.775	1.539	0.702	0.684	1.019	1.8	0.147	0.319	0.09748
Q9UBI6	Guanine nucleotide-binding protein G(I)/G(S)/G(O) subunit gamma-12 OS=Homo sapiens OX=9606 GN=GNG12 PE=1 SV=3	GNG12	8.0061	1.724	1.629	1.671	2.866	2.831	1.466	0.774	0.932	1.166	0.316	0.434	0.014324
Q92630	Dual specificity tyrosine-phosphorylation-regulated kinase 2 OS=Homo sapiens OX=9606 GN=DYRK2 PE=1 SV=3	DYRK2	66.651	1.762	0.991	0.844	0.559	0.882	0.666	1.573	1.002	0.963	1.208	1.074	0.66728
P53004	Biliverdin reductase A OS=Homo sapiens OX=9606 GN=BLVRA PE=1 SV=2	BLVRA	33.428				1.207	0.775				0.997	1.264	1.141	0.6133
P11142	Heat shock cognate 71 kDa protein OS=Homo sapiens OX=9606 GN=HSPA8 PE=1 SV=1	HSPA8	70.897	0.734	1.303	1.092	1.043	1.157	0.994	1.195	0.992	0.997	1.648	1.093	0.55064
Q9Y2S6	Translation machinery-associated protein 7 OS=Homo sapiens OX=9606 GN=TMA7 PE=1 SV=1	TMA7	7.0662	1.869	1.343	1.283			0.341	0.228	0.257			0.184	0.00054323
Q9Y2E5	Epididymis-specific alpha-mannosidase OS=Homo sapiens OX=9606 GN=MAN2B2 PE=1 SV=4	MAN2B2	113.98	0.715	0.881	0.816			0.784	1.904	1.498			1.735	0.145855
Q9H479	Fructosamine-3-kinase OS=Homo sapiens OX=9606 GN=FN3K PE=1 SV=1	FN3K	35.171	1.992	0.837	0.899	1.44	1.345	0.876	1.267	0.939	1.165	1.218	0.839	0.46578
P04746	Pancreatic alpha-amylase OS=Homo sapiens OX=9606 GN=AMY2A PE=1 SV=2	AMY2A	57.706	0.951	0.64	0.514			0.317	1.274	1.783			1.603	0.6449
P08754	Guanine nucleotide-binding protein G(i) subunit alpha OS=Homo sapiens OX=9606 GN=GNAI3 PE=1 SV=3	GNAI3	40.532	1.162	1.64	1.181	0.595	0.852	1.327	1.417	0.902	1.453	3.121	1.514	0.187341
P08118	Beta-microseminoprotein OS=Homo sapiens OX=9606 GN=MSMB PE=1 SV=1	MSMB	12.865				0.844	1.045				0.538		0.57
P11216	"Glycogen phosphorylase, brain form OS=Homo sapiens OX=9606 GN=PYGB PE=1 SV=5"	PYGB	96.695	1.032	1.488	0.722	0.763	0.837	0.807	1.386	1.562	0.878	0.924	1.148	0.4782
P47755	F-actin-capping protein subunit alpha-2 OS=Homo sapiens OX=9606 GN=CAPZA2 PE=1 SV=3	CAPZA2	32.949	1.025	2.963	1.025	0.768	0.857	0.683	1.009	0.944	0.892	0.81	0.654	0.30648
O43278	Kunitz-type protease inhibitor 1 OS=Homo sapiens OX=9606 GN=SPINT1 PE=1 SV=2	SPINT1	58.397				2.036	0.383				1.696	0.821	1.041	0.78042
O75882	Attractin OS=Homo sapiens OX=9606 GN=ATRN PE=1 SV=2	ATRN	158.54	1.099	1.557	0.928	0.838	1.197	1.224	1.31	1.18	0.951	0.894	0.989	0.98834
Q2M3M2	Sodium/glucose cotransporter 4 OS=Homo sapiens OX=9606 GN=SLC5A9 PE=1 SV=2	SLC5A9	74.072	1.528	2.147	2.297	0.638	0.874	1.073	0.61	0.861	1.481	0.85	0.651	0.25606
Q5SZK8	FRAS1-related extracellular matrix protein 2 OS=Homo sapiens OX=9606 GN=FREM2 PE=1 SV=2	FREM2	351.15	0.65	0.438	0.305			1.71	1.104	3.074			4.227	0.019077
O43707	Alpha-actinin-4 OS=Homo sapiens OX=9606 GN=ACTN4 PE=1 SV=2	ACTN4	104.85	0.739	1.175	1.392	0.926	1.134	1.179	1.195	1.467	0.941	0.718	1.025	0.90982
Q8NBJ4	Golgi membrane protein 1 OS=Homo sapiens OX=9606 GN=GOLM1 PE=1 SV=1	GOLM1	45.333	1.08	1.948	1.255			0.663	0.391	0.546			0.374	0.0142007
Q8IYJ3	Synaptotagmin-like protein 1 OS=Homo sapiens OX=9606 GN=SYTL1 PE=1 SV=1	SYTL1	61.856	1.152	1.246	0.706	1.422	1.15	1.23	0.864	0.796	1.11	0.856	0.856	0.3493
Q02952	A-kinase anchor protein 12 OS=Homo sapiens OX=9606 GN=AKAP12 PE=1 SV=4	AKAP12	191.48	1.912	1.302	1.117	1.337	2.298	1.797	0.862	1.111	1.458	0.507	0.72	0.177462
P06703	Protein S100-A6 OS=Homo sapiens OX=9606 GN=S100A6 PE=1 SV=1	S100A6	10.18	1.154	0.709	1.007	1.239	1.694	2.432	1.451	1.002	0.906	0.619	1.105	0.92224
Q3MJ13	WD repeat-containing protein 72 OS=Homo sapiens OX=9606 GN=WDR72 PE=2 SV=2	WDR72	123.42	1.355	1.482	1.268			1.274	1.096	1.111			0.848	0.066479
P48506	Glutamate--cysteine ligase catalytic subunit OS=Homo sapiens OX=9606 GN=GCLC PE=1 SV=2	GCLC	72.765	1.268	1.482	1.148	0.827	2.988	0.958	0.634	1.183	0.409	0.643	0.496	0.044857
P04899	Guanine nucleotide-binding protein G(i) subunit alpha-2 OS=Homo sapiens OX=9606 GN=GNAI2 PE=1 SV=3	GNAI2	40.45	1.051	0.535	1.372	1.505	1.997	1.46	0.593	0.806	1.326	1.81	0.928	0.8355
Q6Y7W6	GRB10-interacting GYF protein 2 OS=Homo sapiens OX=9606 GN=GIGYF2 PE=1 SV=1	GIGYF2	150.07				13.734					0.367		0.027
O60437	Periplakin OS=Homo sapiens OX=9606 GN=PPL PE=1 SV=4	PPL	204.74	0.654	0.799	1.503	0.858	3.523	1.533	0.549	1.273	1.509	0.543	0.737	0.62108
P22314	Ubiquitin-like modifier-activating enzyme 1 OS=Homo sapiens OX=9606 GN=UBA1 PE=1 SV=3	UBA1	117.85	0.929	2.108	1.203	0.92	0.938	0.974	1.416	1.724	0.87	0.962	0.975	0.98396
P19801	Amiloride-sensitive amine oxidase [copper-containing] OS=Homo sapiens OX=9606 GN=AOC1 PE=1 SV=4	AOC1	85.377	0.881	1.152	0.596	0.466	0.602	0.393	1.397	2.279	1.11	0.687	1.587	0.34114
Q96FV2	Secernin-2 OS=Homo sapiens OX=9606 GN=SCRN2 PE=1 SV=3	SCRN2	46.596				1.148	1.407				0.531	1.06	0.623	0.281
P62424	60S ribosomal protein L7a OS=Homo sapiens OX=9606 GN=RPL7A PE=1 SV=2	RPL7A	29.995	2.117	1.899	0.927			1.029	1.203	1.059			0.666	0.25676
P07288	Prostate-specific antigen OS=Homo sapiens OX=9606 GN=KLK3 PE=1 SV=2	KLK3	28.741	2.086	0.974	0.39	0.706	0.419	2.021	1.319	0.249	1.741	0.325	1.236	0.865
Q9P0W8	Spermatogenesis-associated protein 7 OS=Homo sapiens OX=9606 GN=SPATA7 PE=1 SV=3	SPATA7	67.718	9.109	1.111	1.109			1.287	0.821	0.91			0.266	0.31568
P05543	Thyroxine-binding globulin OS=Homo sapiens OX=9606 GN=SERPINA7 PE=1 SV=2	SERPINA7	46.324	0.701	1.904	0.693			1.836	2	1.595			1.647	0.145921
P16885	"1-phosphatidylinositol 4,5-bisphosphate phosphodiesterase gamma-2 OS=Homo sapiens OX=9606 GN=PLCG2 PE=1 SV=4"	PLCG2	147.87	0.722	1.046	0.697	0.706	0.514	1.08	1.237	1.778	1.188	0.665	1.614	0.046397
Q7Z406	Myosin-14 OS=Homo sapiens OX=9606 GN=MYH14 PE=1 SV=2	MYH14	227.87	1.212	1.102	1.127	0.979	1.496	1.217	1.035	1.724	0.96	0.835	0.975	0.74916
P02766	Transthyretin OS=Homo sapiens OX=9606 GN=TTR PE=1 SV=1	TTR	15.887	0.456	1.17	3.929			1.623	0.218	3.942			1.041	0.90416
A0A0J9YX35	Immunoglobulin heavy variable 3-64D OS=Homo sapiens OX=9606 GN=IGHV3-64D PE=3 SV=1	IGHV3-64D	12.822	0.46	0.581	0.419			3.686	0.554	3.921			5.59	0.159818
Q02383	Semenogelin-2 OS=Homo sapiens OX=9606 GN=SEMG2 PE=1 SV=1	SEMG2	65.444	1.096	8.747	0.866	0.674	0.362	0.832	0.798	0.689	1.996	0.908	0.445	0.76242
O00526	Uroplakin-2 OS=Homo sapiens OX=9606 GN=UPK2 PE=1 SV=2	UPK2	19.438	1.02	1.09	1.656	0.701	1.813	1.012	0.785	1.371	1.743	0.65	0.886	0.62138
Q9NP94	Zinc transporter ZIP2 OS=Homo sapiens OX=9606 GN=SLC39A2 PE=1 SV=2	SLC39A2	32.742				0.891	0.56				1.566	0.52	1.438	0.72188
P15848	Arylsulfatase B OS=Homo sapiens OX=9606 GN=ARSB PE=1 SV=1	ARSB	59.687	0.764	0.722	0.903	0.867	0.85	1.304	1.051	1.156	1.376	1.169	1.475	0.00028079
P51858	Hepatoma-derived growth factor OS=Homo sapiens OX=9606 GN=HDGF PE=1 SV=1	HDGF	26.788	0.972	1.215	0.607			9.493	0.426				5.325	0.544
P01011	Alpha-1-antichymotrypsin OS=Homo sapiens OX=9606 GN=SERPINA3 PE=1 SV=2	SERPINA3	47.65	0.556	2.342	0.482			0.452	1.136	1.535			0.924	0.90912
P00973	2'-5'-oligoadenylate synthase 1 OS=Homo sapiens OX=9606 GN=OAS1 PE=1 SV=4	OAS1	46.028	0.764	0.875	0.734			2.179	0.517	1.593			1.807	0.4295
P0DOX8	Immunoglobulin lambda-1 light chain OS=Homo sapiens OX=9606 PE=1 SV=1	---	22.83	0.336	1.105	0.703	0.852	1.572	3.183	0.684	1.124	1.093	0.944	1.539	0.31076
P52306	Rap1 GTPase-GDP dissociation stimulator 1 OS=Homo sapiens OX=9606 GN=RAP1GDS1 PE=1 SV=3	RAP1GDS1	66.316	1.407	4.344	1.441			1.069	1.077	1.084			0.449	0.22196
Q9H4M9	EH domain-containing protein 1 OS=Homo sapiens OX=9606 GN=EHD1 PE=1 SV=2	EHD1	60.626	0.587	0.755	1.134	1.317	1.469	0.843	1.26	0.933	1.046	0.889	0.945	0.95582
P30153	Serine/threonine-protein phosphatase 2A 65 kDa regulatory subunit A alpha isoform OS=Homo sapiens OX=9606 GN=PPP2R1A PE=1 SV=4	PPP2R1A	65.308	1.753	1.157	0.802	0.986	1.275	1.243	1.046	1.575	0.912	0.94	0.957	0.85812
Q13618	Cullin-3 OS=Homo sapiens OX=9606 GN=CUL3 PE=1 SV=2	CUL3	88.929	1.282	0.711	0.978	0.808	1.341	2.526	1.072	1.126	0.987	0.932	1.297	0.36364
P32455	Guanylate-binding protein 1 OS=Homo sapiens OX=9606 GN=GBP1 PE=1 SV=2	GBP1	67.93	1.118	1.709	1.378	0.6	1.533	0.738	1.434	0.812	0.613	1.153	0.749	0.28488
Q96PU5	E3 ubiquitin-protein ligase NEDD4-like OS=Homo sapiens OX=9606 GN=NEDD4L PE=1 SV=2	NEDD4L	111.93	0.806	1.44	0.812	0.841	0.727	1.02	2.08	1.117	1.177	1.223	1.43	0.075804
Q14166	Tubulin--tyrosine ligase-like protein 12 OS=Homo sapiens OX=9606 GN=TTLL12 PE=1 SV=2	TTLL12	74.403	1.867	5.527	1.2			0.947	0.942	1.135			0.352	0.2099
O00233	26S proteasome non-ATPase regulatory subunit 9 OS=Homo sapiens OX=9606 GN=PSMD9 PE=1 SV=3	PSMD9	24.682	1.229	1.22	1.249	1.074	0.616	1.087	1.204	0.859	1.884	0.865	1.095	0.70154
P57735	Ras-related protein Rab-25 OS=Homo sapiens OX=9606 GN=RAB25 PE=1 SV=2	RAB25	23.495				0.652	0.532				0.601	1.024	1.372	0.42062
P00439	Phenylalanine-4-hydroxylase OS=Homo sapiens OX=9606 GN=PAH PE=1 SV=1	PAH	51.861	0.166	0.697	0.58			0.584	1.789	0.891			2.262	0.190343
P50151	Guanine nucleotide-binding protein G(I)/G(S)/G(O) subunit gamma-10 OS=Homo sapiens OX=9606 GN=GNG10 PE=1 SV=1	GNG10	7.2053	1.271	1.525	1.52			0.458	0.613	1.655			0.632	0.25814
Q9UNN8	Endothelial protein C receptor OS=Homo sapiens OX=9606 GN=PROCR PE=1 SV=1	PROCR	26.671	1.674	0.544	0.556	0.727		0.993	1.552	1.269	1.158	0.859	1.332	0.181901
Q06481	Amyloid-like protein 2 OS=Homo sapiens OX=9606 GN=APLP2 PE=1 SV=2	APLP2	86.955	1.337	2.798	1.836			0.743	1.379	1.148			0.548	0.105099
P37235	Hippocalcin-like protein 1 OS=Homo sapiens OX=9606 GN=HPCAL1 PE=1 SV=3	HPCAL1	22.313	1.082	1.966	0.723	1.068	0.7	0.749	1.067	0.978	0.799	1.408	0.903	0.81162
P17342	Atrial natriuretic peptide receptor 3 OS=Homo sapiens OX=9606 GN=NPR3 PE=1 SV=2	NPR3	59.807	0.869	1.813	0.466			0.399	1.214	1.289			0.922	0.92614
P67936	Tropomyosin alpha-4 chain OS=Homo sapiens OX=9606 GN=TPM4 PE=1 SV=3	TPM4	28.521	2.359	3.088	1.403	1.235	1.505	1.34	0.918	0.893	0.595	0.753	0.469	0.0101989
P06727	Apolipoprotein A-IV OS=Homo sapiens OX=9606 GN=APOA4 PE=1 SV=3	APOA4	45.398	1.055	0.859	1.135	0.474	0.655	0.628	0.637	3.341	1.199	1.638	1.781	0.26604
P51452	Dual specificity protein phosphatase 3 OS=Homo sapiens OX=9606 GN=DUSP3 PE=1 SV=1	DUSP3	20.478	1.977	0.839	1.769			1.386	0.212	0.558			0.47	0.187319
Q9NQ84	G-protein coupled receptor family C group 5 member C OS=Homo sapiens OX=9606 GN=GPRC5C PE=1 SV=2	GPRC5C	48.193	1.495	0.568	1.461	0.996	0.977	0.816	1.079	1.168	1.152	0.944	0.939	0.93734
P63000	Ras-related C3 botulinum toxin substrate 1 OS=Homo sapiens OX=9606 GN=RAC1 PE=1 SV=1	RAC1	21.45	1.715	0.92	1.484	1.308	1.538	0.842	1.009	0.96	0.927	0.854	0.659	0.024379
Q9BYG5	Partitioning defective 6 homolog beta OS=Homo sapiens OX=9606 GN=PARD6B PE=1 SV=1	PARD6B	41.182	0.443	0.896	0.849			0.748	0.432	0.915			0.957	0.89776
P17081	Rho-related GTP-binding protein RhoQ OS=Homo sapiens OX=9606 GN=RHOQ PE=1 SV=2	RHOQ	22.659	0.73	1.525	0.484			0.935	1.108	0.911			1.078	0.61318
Q9NY47	Voltage-dependent calcium channel subunit alpha-2/delta-2 OS=Homo sapiens OX=9606 GN=CACNA2D2 PE=1 SV=2	CACNA2D2	129.82	0.402	0.424	0.384			0.273	0.741	0.934			1.61	0.44904
Q13637	Ras-related protein Rab-32 OS=Homo sapiens OX=9606 GN=RAB32 PE=1 SV=3	RAB32	24.997	1.03	2.836	1.775	1.349	0.909	0.664	2.569	0.66	0.606	0.934	0.688	0.20982
A0A075B6H9	Immunoglobulin lambda variable 4-69 OS=Homo sapiens OX=9606 GN=IGLV4-69 PE=1 SV=1	IGLV4-69	12.773	0.133	0.21	0.513	2.861	0.189	12.495	0.519	0.548	0.135	0.243	3.569	0.587
P62826	GTP-binding nuclear protein Ran OS=Homo sapiens OX=9606 GN=RAN PE=1 SV=3	RAN	24.423	0.968	0.667	0.841	0.792	0.99	0.871	0.963	1.769	1.001	0.952	1.305	0.139417
P20711	Aromatic-L-amino-acid decarboxylase OS=Homo sapiens OX=9606 GN=DDC PE=1 SV=2	DDC	53.926	1.291	0.794	0.809	1.215	0.833	0.972	1.768	0.993	1.807	1.379	1.4	0.095139
Q9H6Y7	E3 ubiquitin-protein ligase RNF167 OS=Homo sapiens OX=9606 GN=RNF167 PE=1 SV=1	RNF167	38.298				1.905	0.865				1.197	2.073	1.181	0.7118
Q1EHB4	Sodium-coupled monocarboxylate transporter 2 OS=Homo sapiens OX=9606 GN=SLC5A12 PE=2 SV=2	SLC5A12	67.646	1.112	0.761	0.712	0.637	0.823	0.72	1.684	0.883	1.592	1.52	1.582	0.065996
P53634	Dipeptidyl peptidase 1 OS=Homo sapiens OX=9606 GN=CTSC PE=1 SV=2	CTSC	51.853	0.906	0.611	1.936			2.369	0.925	1.257			1.318	0.51158
P18085	ADP-ribosylation factor 4 OS=Homo sapiens OX=9606 GN=ARF4 PE=1 SV=3	ARF4	20.511	0.879	1.002	0.672			1.232	0.884	0.863			1.167	0.40142
P36507	Dual specificity mitogen-activated protein kinase kinase 2 OS=Homo sapiens OX=9606 GN=MAP2K2 PE=1 SV=1	MAP2K2	44.424	2.019	1.57	1.59			0.929	1.317	1.509			0.725	0.113976
Q96K21	Abscission/NoCut checkpoint regulator OS=Homo sapiens OX=9606 GN=ZFYVE19 PE=1 SV=3	ZFYVE19	51.546	1.139	1.031	1.021	1.184	1.64	0.874	1.016	1.295	1.44	0.928	0.923	0.53918
P21796	Voltage-dependent anion-selective channel protein 1 OS=Homo sapiens OX=9606 GN=VDAC1 PE=1 SV=2	VDAC1	30.772	0.818	0.456	1.699	1.108	0.666	0.983	0.876	0.801	1.626	0.947	1.102	0.5385
Q8WTT2	Nucleolar complex protein 3 homolog OS=Homo sapiens OX=9606 GN=NOC3L PE=1 SV=1	NOC3L	92.547	1.882	0.932	0.522	0.375	0.231	0.911	1.525	1.261	1.155	2.518	1.87	0.072261
Q8N357	Solute carrier family 35 member F6 OS=Homo sapiens OX=9606 GN=SLC35F6 PE=1 SV=1	SLC35F6	40.214	0.272	0.107	0.475			0.806	0.71	0.333			2.165	0.164702
Q12765	Secernin-1 OS=Homo sapiens OX=9606 GN=SCRN1 PE=1 SV=2	SCRN1	46.382	3.233	3.251	2.601			0.645	0.571	0.36			0.173	0.00076086
Q9UL26	Ras-related protein Rab-22A OS=Homo sapiens OX=9606 GN=RAB22A PE=1 SV=2	RAB22A	21.855	0.689	0.571	0.989	0.956	1.242	1.128	1.025	0.907	0.959	0.627	1.045	0.72532
P62879	Guanine nucleotide-binding protein G(I)/G(S)/G(T) subunit beta-2 OS=Homo sapiens OX=9606 GN=GNB2 PE=1 SV=3	GNB2	37.331	0.493	0.493	1.582	1.079	2.162	1.079	1.556	1.403	0.838	1.238	1.053	0.5479
P30740	Leukocyte elastase inhibitor OS=Homo sapiens OX=9606 GN=SERPINB1 PE=1 SV=1	SERPINB1	42.741	0.557	1.732	0.609	2.438	1.147	2.513	0.503	1.372	0.397	0.523	0.819	0.5234
Q9UBG3	Cornulin OS=Homo sapiens OX=9606 GN=CRNN PE=1 SV=1	CRNN	53.533	0.65	0.271	0.729			0.463	1.091	1.888			2.086	0.26392
P08F94	Fibrocystin OS=Homo sapiens OX=9606 GN=PKHD1 PE=1 SV=1	PKHD1	446.7	1.585	1.067	0.728	0.906	0.848	0.988	1.348	1.042	1.262	0.9	1.079	0.52328
P16284	Platelet endothelial cell adhesion molecule OS=Homo sapiens OX=9606 GN=PECAM1 PE=1 SV=2	PECAM1	82.521				1.372	0.757				1.046	1.178	1.045	0.80456
Q9Y646	Carboxypeptidase Q OS=Homo sapiens OX=9606 GN=CPQ PE=1 SV=1	CPQ	51.887	1.447	7.573	1.601			1.115	1.249	1.34			0.349	0.29964
O00584	Ribonuclease T2 OS=Homo sapiens OX=9606 GN=RNASET2 PE=1 SV=2	RNASET2	29.48	0.84	2.467	0.694			0.876	1.08	0.63			0.646	0.5275
P0DP01	Immunoglobulin heavy variable 1-8 OS=Homo sapiens OX=9606 GN=IGHV1-8 PE=3 SV=1	IGHV1-8	12.992				0.572	2.19				1.054	0.523	0.571	0.6421
O60262	Guanine nucleotide-binding protein G(I)/G(S)/G(O) subunit gamma-7 OS=Homo sapiens OX=9606 GN=GNG7 PE=1 SV=1	GNG7	7.5217	1.035	0.424	0.416				0.985	1.171			1.725	0.20326
P62333	26S proteasome regulatory subunit 10B OS=Homo sapiens OX=9606 GN=PSMC6 PE=1 SV=1	PSMC6	44.172	2.349	1.792	1.089	1.003	1.033	1.35	0.644	1.679	0.805	0.888	0.739	0.25202
Q99828	Calcium and integrin-binding protein 1 OS=Homo sapiens OX=9606 GN=CIB1 PE=1 SV=4	CIB1	21.703	0.552	1.309	0.949	2.718	2.61	3.275	0.608	1.312	0.707	0.624	0.802	0.53334
P26006	Integrin alpha-3 OS=Homo sapiens OX=9606 GN=ITGA3 PE=1 SV=5	ITGA3	116.61	1.082	0.806	0.993	1.108	1.029	1.083	2.008	1.161	1.504	0.934	1.333	0.11906
P23229	Integrin alpha-6 OS=Homo sapiens OX=9606 GN=ITGA6 PE=1 SV=5	ITGA6	126.6	1.199	1.122	0.944			0.854	1.895	1.056			1.165	0.71104
Q8WUW1	Protein BRICK1 OS=Homo sapiens OX=9606 GN=BRK1 PE=1 SV=1	BRK1	8.7448	1.213	1.328	1.231			1.925	1.319	1.321			1.21	0.24554
P31997	Carcinoembryonic antigen-related cell adhesion molecule 8 OS=Homo sapiens OX=9606 GN=CEACAM8 PE=1 SV=2	CEACAM8	38.153				7.811	1.634				0.363	1.249	0.171	0.23608
Q9UKE5	TRAF2 and NCK-interacting protein kinase OS=Homo sapiens OX=9606 GN=TNIK PE=1 SV=1	TNIK	154.94	0.905	1.143	1.044			2.751	0.315	0.105			1.026	0.48158
P30039	Phenazine biosynthesis-like domain-containing protein OS=Homo sapiens OX=9606 GN=PBLD PE=1 SV=2	PBLD	31.785	0.354	0.537	0.933	0.902	0.659	0.555	1.505	0.937	0.873	1.408	1.559	0.120482
Q6P5W5	Zinc transporter ZIP4 OS=Homo sapiens OX=9606 GN=SLC39A4 PE=1 SV=4	SLC39A4	68.407	1.828	2.38	1.041				1.376	0.96			0.668	0.36516
P53680	AP-2 complex subunit sigma OS=Homo sapiens OX=9606 GN=AP2S1 PE=1 SV=2	AP2S1	17.018	1.188	0.622	0.679			0.503	0.62	0.608			0.695	0.20308
P07998	Ribonuclease pancreatic OS=Homo sapiens OX=9606 GN=RNASE1 PE=1 SV=4	RNASE1	17.644	4.202	4.714	4.782	1.87	2.033	3	0.48	0.536	0.464	0.519	0.284	0.0066242
Q96CF2	Charged multivesicular body protein 4c OS=Homo sapiens OX=9606 GN=CHMP4C PE=1 SV=1	CHMP4C	26.41	1.54	1.121	1.234			0.938	1.047	0.989			0.764	0.057699
O94804	Serine/threonine-protein kinase 10 OS=Homo sapiens OX=9606 GN=STK10 PE=1 SV=1	STK10	112.13	1.128	2.184	1.649	1.504	3.378	1.099	0.573	0.82	0.874	0.715	0.415	0.0047411
O95498	Vascular non-inflammatory molecule 2 OS=Homo sapiens OX=9606 GN=VNN2 PE=1 SV=3	VNN2	58.502	0.56	1.777	0.732	5.316	1.85	4.739	0.454	0.84	1.846	0.85	0.853	0.75192
P27216	Annexin A13 OS=Homo sapiens OX=9606 GN=ANXA13 PE=1 SV=3	ANXA13	35.415	0.663	1.825	1.284	0.947	2.459	0.744	1.374	0.827	1.037	0.431	0.615	0.172544
P46459	Vesicle-fusing ATPase OS=Homo sapiens OX=9606 GN=NSF PE=1 SV=3	NSF	82.593	0.867	1.374	0.843			0.948	1.052	1.025			0.981	0.9725
Q8TB45	DEP domain-containing mTOR-interacting protein OS=Homo sapiens OX=9606 GN=DEPTOR PE=1 SV=2	DEPTOR	46.293	0.708	3.741	0.864			0.814	1.056	0.372			0.422	0.3437
P02794	Ferritin heavy chain OS=Homo sapiens OX=9606 GN=FTH1 PE=1 SV=2	FTH1	21.225	0.406	3.811	3.725			1.678	0.487	0.849			0.38	0.4402
P53367	Arfaptin-1 OS=Homo sapiens OX=9606 GN=ARFIP1 PE=1 SV=2	ARFIP1	41.738	0.763	0.887	0.388			0.629	0.778	0.398			0.886	0.7726
P25786	Proteasome subunit alpha type-1 OS=Homo sapiens OX=9606 GN=PSMA1 PE=1 SV=1	PSMA1	29.555	1.226	1.613	1.009	2.16	1.234	3.258	0.711	1.173	0.801	0.896	0.944	0.52878
P13611	Versican core protein OS=Homo sapiens OX=9606 GN=VCAN PE=1 SV=3	VCAN	372.82				0.255	0.402				1.044	1.62	4.055	0.047342
Q14697	Neutral alpha-glucosidase AB OS=Homo sapiens OX=9606 GN=GANAB PE=1 SV=3	GANAB	106.87	0.595	0.375	0.409	0.58	0.591	0.884	1.173	2.788	1.1	0.679	2.598	0.0112387
Q66GS9	Centrosomal protein of 135 kDa OS=Homo sapiens OX=9606 GN=CEP135 PE=1 SV=2	CEP135	133.49				0.269	0.108				0.542	1.046	4.212	0.118385
P25686	DnaJ homolog subfamily B member 2 OS=Homo sapiens OX=9606 GN=DNAJB2 PE=1 SV=3	DNAJB2	35.58	1.455	3.118	1.412	1.013	1.141	1.808	1.027	1.018	0.841	0.776	0.672	0.182536
P08294	Extracellular superoxide dismutase [Cu-Zn] OS=Homo sapiens OX=9606 GN=SOD3 PE=1 SV=2	SOD3	25.851	0.386	0.699	0.36	0.334	0.556	1.011	1.074	0.573	0.53	0.437	1.552	0.107803
P12111	Collagen alpha-3(VI) chain OS=Homo sapiens OX=9606 GN=COL6A3 PE=1 SV=5	COL6A3	343.67	0.609	2.236	0.784			1.07	0.763	0.577			0.664	0.56588
P43005	Excitatory amino acid transporter 3 OS=Homo sapiens OX=9606 GN=SLC1A1 PE=1 SV=2	SLC1A1	57.1	0.819	1.235	0.557	1.803	1.411	0.742	1.415	0.963	1.404	0.666	0.891	0.7576
O94760	"N(G),N(G)-dimethylarginine dimethylaminohydrolase 1 OS=Homo sapiens OX=9606 GN=DDAH1 PE=1 SV=3"	DDAH1	31.121	0.42	1.518	0.686	1.213	0.937	0.853	0.937	1.596	1	0.925	1.112	0.51064
P29508	Serpin B3 OS=Homo sapiens OX=9606 GN=SERPINB3 PE=1 SV=2	SERPINB3	44.564	0.67	3.582	1.424			0.962	0.451	1.804			0.567	0.47836
O00522	Krev interaction trapped protein 1 OS=Homo sapiens OX=9606 GN=KRIT1 PE=1 SV=2	KRIT1	84.347	0.887	1.459	0.901	1.488	1.693	0.919	0.846	0.97	1.599	0.781	0.796	0.25472
Q9H299	SH3 domain-binding glutamic acid-rich-like protein 3 OS=Homo sapiens OX=9606 GN=SH3BGRL3 PE=1 SV=1	SH3BGRL3	10.438	0.327	2.122	0.885	1.781	1.505	1.37	1.235	0.667	0.603	0.471	0.656	0.43368
Q9Y4I1	Unconventional myosin-Va OS=Homo sapiens OX=9606 GN=MYO5A PE=1 SV=2	MYO5A	215.4				0.99	1.1				1.055	1.547	1.245	0.41536
P50552	Vasodilator-stimulated phosphoprotein OS=Homo sapiens OX=9606 GN=VASP PE=1 SV=3	VASP	39.829	0.858	1.973	1.156	3.119	2.523	2.99	0.665	0.723	0.924	0.725	0.626	0.172696
Q16610	Extracellular matrix protein 1 OS=Homo sapiens OX=9606 GN=ECM1 PE=1 SV=2	ECM1	60.673	0.673	0.841	0.544	0.463	0.447	0.447	0.961	6.394	2.786	1.793	4.171	0.083656
P49589	"Cysteine--tRNA ligase, cytoplasmic OS=Homo sapiens OX=9606 GN=CARS PE=1 SV=3"	CARS	85.472				0.743	1.029				0.917	0.933	1.044	0.76306
O75368	SH3 domain-binding glutamic acid-rich-like protein OS=Homo sapiens OX=9606 GN=SH3BGRL PE=1 SV=1	SH3BGRL	12.774	1.144	0.831	1.171			1.594	1.096	1.41			1.303	0.16534
P62330	ADP-ribosylation factor 6 OS=Homo sapiens OX=9606 GN=ARF6 PE=1 SV=2	ARF6	20.082	0.935	1.843	1.214	1.012	0.956	1.181	1.06	0.978	1.002	0.966	0.87	0.4612
P16444	Dipeptidase 1 OS=Homo sapiens OX=9606 GN=DPEP1 PE=1 SV=3	DPEP1	45.673	1.599	1.272	1.616	0.653	0.935	1.222	1.551	0.844	0.989	1.145	0.947	0.9213
Q9Y4K3	TNF receptor-associated factor 6 OS=Homo sapiens OX=9606 GN=TRAF6 PE=1 SV=1	TRAF6	59.573				0.808	3.919				0.708	0.765	0.312	0.3802
P30044	"Peroxiredoxin-5, mitochondrial OS=Homo sapiens OX=9606 GN=PRDX5 PE=1 SV=4"	PRDX5	22.086	1.019	0.902	1.863	0.704	1.228	1.104	0.653	0.755	1.083	0.948	0.795	0.34214
Q13621	Solute carrier family 12 member 1 OS=Homo sapiens OX=9606 GN=SLC12A1 PE=1 SV=2	SLC12A1	121.45	1.239	0.934	1.16	0.927	0.858	0.96	0.909	1.172	0.867	0.887	0.937	0.5138
P0DMQ5	Putative transmembrane protein INAFM2 OS=Homo sapiens OX=9606 GN=INAFM2 PE=2 SV=1	INAFM2	15.439	0.837	1.022	0.807	1.462	1.359	0.691	1.262	0.914	1.164	0.748	0.871	0.44524
P18065	Insulin-like growth factor-binding protein 2 OS=Homo sapiens OX=9606 GN=IGFBP2 PE=1 SV=2	IGFBP2	34.814				2.073	0.881				1.587	0.493	0.704	0.6177
O60500	Nephrin OS=Homo sapiens OX=9606 GN=NPHS1 PE=1 SV=1	NPHS1	134.74	0.859	1.284	0.546	0.707	0.839	0.578	2.075	1.603	0.909	1.213	1.506	0.21224
P58107	Epiplakin OS=Homo sapiens OX=9606 GN=EPPK1 PE=1 SV=3	EPPK1	555.65				1.042	1.005				0.724	0.752	0.721	0.0063595
P04075	Fructose-bisphosphate aldolase A OS=Homo sapiens OX=9606 GN=ALDOA PE=1 SV=2	ALDOA	39.42	1.157	0.788	1.069	1.415	1.874	1.796	1.17	1.271	1.144	0.98	1.009	0.87138
P02743	Serum amyloid P-component OS=Homo sapiens OX=9606 GN=APCS PE=1 SV=2	APCS	25.387	0.385	1.657	0.336	0.461	0.56	0.275	0.684	1.582	0.726	4.272	2.218	0.32834
Q5MY95	Ectonucleoside triphosphate diphosphohydrolase 8 OS=Homo sapiens OX=9606 GN=ENTPD8 PE=1 SV=2	ENTPD8	53.903	0.281	0.262	0.363			0.399	0.2	0.33			1.025	0.9839
Q5VW32	BRO1 domain-containing protein BROX OS=Homo sapiens OX=9606 GN=BROX PE=1 SV=1	BROX	46.476	2.646	0.728	2.047	1.154	1.917	0.746	1.141	0.727	0.769	0.75	0.487	0.031719
Q9HCJ3	Ribonucleoprotein PTB-binding 2 OS=Homo sapiens OX=9606 GN=RAVER2 PE=1 SV=2	RAVER2	74.338	0.648	0.148	0.45	0.113	0.084				0.043	0.775	1.417	0.8953
Q08554	Desmocollin-1 OS=Homo sapiens OX=9606 GN=DSC1 PE=1 SV=2	DSC1	99.986	0.734	0.966	1.395	1.985	1.47	0.556	0.658	0.569	0.368	1.322	0.53	0.038518
Q9Y342	Plasmolipin OS=Homo sapiens OX=9606 GN=PLLP PE=1 SV=1	PLLP	19.986	2.01	2.408	1.924			0.666	1.08	1.005			0.434	0.0067581
Q9Y6W5	Wiskott-Aldrich syndrome protein family member 2 OS=Homo sapiens OX=9606 GN=WASF2 PE=1 SV=3	WASF2	54.283	0.675	2.857	0.811	3.388	4.508	0.996	1.402	1.386	0.285	0.538	0.376	0.115042
P84022	Mothers against decapentaplegic homolog 3 OS=Homo sapiens OX=9606 GN=SMAD3 PE=1 SV=1	SMAD3	48.08	0.534	0.61	2.395	2.213	6.984	1.185	0.689	0.831	0.981	0.955	0.364	0.29294
Q9UMY4	Sorting nexin-12 OS=Homo sapiens OX=9606 GN=SNX12 PE=1 SV=4	SNX12	18.884	1.056	0.397	0.667			0.605	0.819	0.893			1.093	0.64364
Q96FN5	Kinesin-like protein KIF12 OS=Homo sapiens OX=9606 GN=KIF12 PE=1 SV=3	KIF12	70.659	1.224	0.742	1.403	0.796	0.702	0.615	1.125	1.084	0.861	0.982	0.959	0.89986
P62277	40S ribosomal protein S13 OS=Homo sapiens OX=9606 GN=RPS13 PE=1 SV=2	RPS13	17.222	2.692	2.567	2.855			1.31	0.407	0.818			0.312	0.065059
P19256	Lymphocyte function-associated antigen 3 OS=Homo sapiens OX=9606 GN=CD58 PE=1 SV=1	CD58	28.147	1.592	1.548	3.747	1.151	1.209	1.106	1.332	0.695	1.358	1.113	0.606	0.121622
Q96H20	Vacuolar-sorting protein SNF8 OS=Homo sapiens OX=9606 GN=SNF8 PE=1 SV=1	SNF8	28.864	1.922	0.384	1.213	0.899	1.039	0.794	0.951	0.971	0.635	1.111	0.818	0.7408
P00568	Adenylate kinase isoenzyme 1 OS=Homo sapiens OX=9606 GN=AK1 PE=1 SV=3	AK1	21.635	2.617	2.371	1.629			0.858	0.619	1.147			0.397	0.0150619
O43866	CD5 antigen-like OS=Homo sapiens OX=9606 GN=CD5L PE=1 SV=1	CD5L	38.087	0.472	0.295	0.204	0.488	0.624	0.573	0.246	4.106	0.504	2.662	3.884	0.15306
Q5VVJ2	Histone H2A deubiquitinase MYSM1 OS=Homo sapiens OX=9606 GN=MYSM1 PE=1 SV=1	MYSM1	95.031				0.535	0.348				0.838	0.734	1.78	0.117359
P62191	26S proteasome regulatory subunit 4 OS=Homo sapiens OX=9606 GN=PSMC1 PE=1 SV=1	PSMC1	49.184	2.588	1.746	1.274			0.961	1.189	1.231			0.603	0.098683
Q07283	Trichohyalin OS=Homo sapiens OX=9606 GN=TCHH PE=1 SV=2	TCHH	253.92				2.843	0.366				0.597	1.27	0.582	0.89806
P45974	Ubiquitin carboxyl-terminal hydrolase 5 OS=Homo sapiens OX=9606 GN=USP5 PE=1 SV=2	USP5	95.785	1.81	0.887	1.067	0.792	1	0.967	1.139	0.982	0.99	1.462	0.997	0.86466
Q8N271	Prominin-2 OS=Homo sapiens OX=9606 GN=PROM2 PE=1 SV=1	PROM2	91.882	0.745	0.524	1.411	0.865	1.796	0.498	0.815	1.489	1.019	1.208	0.942	0.92554
Q9UL15	BAG family molecular chaperone regulator 5 OS=Homo sapiens OX=9606 GN=BAG5 PE=1 SV=1	BAG5	51.199	1.908	2.07	1.112			0.932	1.234	0.846			0.592	0.089777
O00476	Sodium-dependent phosphate transport protein 4 OS=Homo sapiens OX=9606 GN=SLC17A3 PE=1 SV=2	SLC17A3	46.106	1.168	1.247	1.157	1.229	1.124	0.939	1.32	0.931	1.143	0.944	0.891	0.159556
P25815	Protein S100-P OS=Homo sapiens OX=9606 GN=S100P PE=1 SV=2	S100P	10.4	0.607	0.442	2.134	1.803	4.315	2.499	0.774	0.899	1.224	0.521	0.636	0.58994
Q9P2L0	WD repeat-containing protein 35 OS=Homo sapiens OX=9606 GN=WDR35 PE=1 SV=3	WDR35	133.55	4.661	1.423	1.709			0.996	1.385	0.888			0.419	0.131519
Q9UHB6	LIM domain and actin-binding protein 1 OS=Homo sapiens OX=9606 GN=LIMA1 PE=1 SV=1	LIMA1	85.225	1.018	0.803	2.293			0.47		0.615			0.396	0.144017
O60279	Sushi domain-containing protein 5 OS=Homo sapiens OX=9606 GN=SUSD5 PE=1 SV=3	SUSD5	68.02				0.447	0.762				0.989	1.111	1.737	0.165081
Q15019	Septin-2 OS=Homo sapiens OX=9606 GN=SEPTIN2 PE=1 SV=1	SEPTIN2	41.487	1.152	1.917	1.783			0.917	0.938	1.114			0.612	0.050703
P07858	Cathepsin B OS=Homo sapiens OX=9606 GN=CTSB PE=1 SV=3	CTSB	37.821	0.752	0.817	0.791	0.641	0.845	0.508	1.507	1.504	1.319	1.691	1.698	0.113204
Q8N1T3	Unconventional myosin-Ih OS=Homo sapiens OX=9606 GN=MYO1H PE=1 SV=2	MYO1H	119.04				3.05	0.683				1.965	1.069	0.813	0.99636
Q7Z3F1	Integral membrane protein GPR155 OS=Homo sapiens OX=9606 GN=GPR155 PE=2 SV=2	GPR155	96.918	0.636	0.503	1.121	0.878	0.746	0.949	1.144	0.937	1.209	1.325	1.433	0.034783
P52565	Rho GDP-dissociation inhibitor 1 OS=Homo sapiens OX=9606 GN=ARHGDIA PE=1 SV=3	ARHGDIA	23.207	1.491	2.946	0.994	0.674	0.854	0.782	1.308	0.579	0.994	1.152	0.692	0.40276
Q14451	Growth factor receptor-bound protein 7 OS=Homo sapiens OX=9606 GN=GRB7 PE=1 SV=2	GRB7	59.68	2.329	1.242	3.061	1.056	1.325	1.564	0.585	0.719	0.693	0.814	0.485	0.029397
P21281	"V-type proton ATPase subunit B, brain isoform OS=Homo sapiens OX=9606 GN=ATP6V1B2 PE=1 SV=3"	ATP6V1B2	56.5	1.224	1.047	0.903	0.583	0.504	0.943	1.455	1.105	0.659	1.473	1.322	0.23254
Q9NQ66	"1-phosphatidylinositol 4,5-bisphosphate phosphodiesterase beta-1 OS=Homo sapiens OX=9606 GN=PLCB1 PE=1 SV=1"	PLCB1	138.57	1.05	1.56	0.882			1.119	0.853	0.931			0.831	0.43456
Q9Y696	Chloride intracellular channel protein 4 OS=Homo sapiens OX=9606 GN=CLIC4 PE=1 SV=4	CLIC4	28.772	1.26	0.194	2.859	1.525	2.481	0.587	0.907	0.442	0.651	0.69	0.394	0.26454
P35998	26S proteasome regulatory subunit 7 OS=Homo sapiens OX=9606 GN=PSMC2 PE=1 SV=3	PSMC2	48.633	0.675	0.852	0.503	0.382	0.357	0.595	1.32	1.995	0.91	1.495	2.281	0.0174604
Q8NEW0	Zinc transporter 7 OS=Homo sapiens OX=9606 GN=SLC30A7 PE=2 SV=1	SLC30A7	41.625	1.019	0.896	1.208	1.417	0.776	0.925	0.905	1.067	2.183	2.095	1.35	0.31062
P05981	Serine protease hepsin OS=Homo sapiens OX=9606 GN=HPN PE=1 SV=1	HPN	45.011	1.17	0.757	0.913	1.15	1.217	0.542	1.387	0.672	0.927	0.843	0.839	0.2823
P08519	Apolipoprotein(a) OS=Homo sapiens OX=9606 GN=LPA PE=1 SV=1	LPA	501.31				0.599	0.426				0.414	1.139	1.515	0.62334
P07237	Protein disulfide-isomerase OS=Homo sapiens OX=9606 GN=P4HB PE=1 SV=3	P4HB	57.116	0.763	1.465	0.525	0.695	0.418	1.931	0.83	1.78	0.859	1.39	1.756	0.062442
P61106	Ras-related protein Rab-14 OS=Homo sapiens OX=9606 GN=RAB14 PE=1 SV=4	RAB14	23.897	1.289	1.792	0.743	0.949	0.664	0.792	1.315	0.836	1.252	0.588	0.88	0.66966
A0A0C4DH68	Immunoglobulin kappa variable 2-24 OS=Homo sapiens OX=9606 GN=IGKV2-24 PE=3 SV=1	IGKV2-24	13.079	0.556	1.457	1.824			1.951	0.239	2.893			1.325	0.97338
Q6P9B6	MTOR-associated protein MEAK7 OS=Homo sapiens OX=9606 GN=MEAK7 PE=1 SV=2	MEAK7	50.993	1.145	1.188	0.956			0.615	1.121	0.908			0.804	0.2651
Q9UBQ0	Vacuolar protein sorting-associated protein 29 OS=Homo sapiens OX=9606 GN=VPS29 PE=1 SV=1	VPS29	20.505	1.41	1.729	0.674			1.237	1.663	1.225			1.082	0.66276
P01009	Alpha-1-antitrypsin OS=Homo sapiens OX=9606 GN=SERPINA1 PE=1 SV=3	SERPINA1	46.736	0.906	2.68	0.815	0.513	0.266	0.587	0.507	4.803	0.418	0.845	1.382	0.83522
P16333	Cytoplasmic protein NCK1 OS=Homo sapiens OX=9606 GN=NCK1 PE=1 SV=1	NCK1	42.864	1.072	1.204	1.033	1.227	1.224	1.409	0.936	0.969	0.765	1.023	0.886	0.22388
Q9BXJ7	Protein amnionless OS=Homo sapiens OX=9606 GN=AMN PE=1 SV=2	AMN	47.754	0.265	1.283	0.376			0.891	1.285	0.998			1.65	0.2107
A0A0B4J1V6	Immunoglobulin heavy variable 3-73 OS=Homo sapiens OX=9606 GN=IGHV3-73 PE=3 SV=1	IGHV3-73	12.858	0.441	0.566	1.811	1.109	4.222	1.215	0.623	4.121	1.43	1.472	1.087	0.66744
P12830	Cadherin-1 OS=Homo sapiens OX=9606 GN=CDH1 PE=1 SV=3	CDH1	97.455	0.989	1.184	0.665	0.703	0.691	0.792	1.128	0.569	0.818	0.318	0.857	0.41352
P07195	L-lactate dehydrogenase B chain OS=Homo sapiens OX=9606 GN=LDHB PE=1 SV=2	LDHB	36.638	1.181	0.821	1.145	1.072	1.129	0.414	1.007	0.877	0.614	1.408	0.808	0.25942
Q15758	Neutral amino acid transporter B(0) OS=Homo sapiens OX=9606 GN=SLC1A5 PE=1 SV=2	SLC1A5	56.598	1.022	1.166	1.274	0.57	0.699	0.617	1.588	0.848	0.949	0.915	1.039	0.87486
P12814	Alpha-actinin-1 OS=Homo sapiens OX=9606 GN=ACTN1 PE=1 SV=2	ACTN1	103.06	0.718	1.561	0.882	1.718	0.729	3.347	0.96	1.373	1.675	0.894	1.471	0.301
Q05707	Collagen alpha-1(XIV) chain OS=Homo sapiens OX=9606 GN=COL14A1 PE=1 SV=3	COL14A1	193.51	1.131	1.035	0.626	1.535	1.079	0.813	1	1.433	1.565	0.892	1.055	0.77108
P78363	Retinal-specific phospholipid-transporting ATPase ABCA4 OS=Homo sapiens OX=9606 GN=ABCA4 PE=1 SV=3	ABCA4	255.94	11.265	2.104	6.005			0.443	0.287	0.552			0.066	0.0084772
O96011	Peroxisomal membrane protein 11B OS=Homo sapiens OX=9606 GN=PEX11B PE=1 SV=1	PEX11B	28.431	0.406	0.435	4.797			0.876	0.195	0.305			0.244	0.37224
P0DOY3	Immunoglobulin lambda constant 3 OS=Homo sapiens OX=9606 GN=IGLC3 PE=1 SV=1	IGLC3	11.265	0.664	0.527	0.652	0.972	1.165	5.613	0.69	1.325	0.572	0.86	2.276	0.32468
O76082	Solute carrier family 22 member 5 OS=Homo sapiens OX=9606 GN=SLC22A5 PE=1 SV=1	SLC22A5	62.751	0.422	0.971	1.343	0.982	0.839	0.828	1.956	0.751	1.605	0.978	1.343	0.3162
Q96EY5	Multivesicular body subunit 12A OS=Homo sapiens OX=9606 GN=MVB12A PE=1 SV=1	MVB12A	28.783	0.787	1.531	1.362	1.056	1.53	0.919	1.216	1.312	0.876	1.006	0.85	0.36662
Q9Y496	Kinesin-like protein KIF3A OS=Homo sapiens OX=9606 GN=KIF3A PE=1 SV=4	KIF3A	80.04	1.535	1.269	1.169			0.825	0.729	0.355			0.48	0.045517
P09622	"Dihydrolipoyl dehydrogenase, mitochondrial OS=Homo sapiens OX=9606 GN=DLD PE=1 SV=2"	DLD	54.177	1.949	2.295	1.657			2.64	1.475	1.118			0.887	0.54726
P04439	"HLA class I histocompatibility antigen, A alpha chain OS=Homo sapiens OX=9606 GN=HLA-A PE=1 SV=2"	HLA-A	40.84				1.131	0.492				0.93	1.321	1.387	0.4731
Q9H0W9	Ester hydrolase C11orf54 OS=Homo sapiens OX=9606 GN=C11orf54 PE=1 SV=1	C11orf54	35.117	1.772	1.369	1.473			0.759	0.622	0.461			0.399	0.0047184
Q14204	Cytoplasmic dynein 1 heavy chain 1 OS=Homo sapiens OX=9606 GN=DYNC1H1 PE=1 SV=5	DYNC1H1	532.4	1.037	1.514	0.671	0.633	0.584	0.694	1.158	1.347	0.786	1.014	1.126	0.48638
O00182	Galectin-9 OS=Homo sapiens OX=9606 GN=LGALS9 PE=1 SV=2	LGALS9	39.518	0.779	1.022	0.937			0.513	1.244	2.148			1.426	0.658
Q9UDY4	DnaJ homolog subfamily B member 4 OS=Homo sapiens OX=9606 GN=DNAJB4 PE=1 SV=1	DNAJB4	37.806	1.234	1.611	0.734			1.074	1.356	0.755			0.89	0.75872
Q15208	Serine/threonine-protein kinase 38 OS=Homo sapiens OX=9606 GN=STK38 PE=1 SV=1	STK38	54.19				1.303	1.925				0.95	1.677	0.814	0.57796
Q05655	Protein kinase C delta type OS=Homo sapiens OX=9606 GN=PRKCD PE=1 SV=2	PRKCD	77.504	1.065	1.046	0.759			0.827	0.952	0.776			0.89	0.43684
Q01415	N-acetylgalactosamine kinase OS=Homo sapiens OX=9606 GN=GALK2 PE=1 SV=1	GALK2	50.378	1.283	1.294	1.245	0.676	0.936	0.913	1.262	1.21	0.922	1.225	1.018	0.8054
P36957	"Dihydrolipoyllysine-residue succinyltransferase component of 2-oxoglutarate dehydrogenase complex, mitochondrial OS=Homo sapiens OX=9606 GN=DLST PE=1 SV=4"	DLST	48.755				1.257	0.478				0.545	0.589	0.654	0.58436
P25774	Cathepsin S OS=Homo sapiens OX=9606 GN=CTSS PE=1 SV=3	CTSS	37.495				1.625	0.839				2.281	1.389	1.489	0.41492
Q9P206	Uncharacterized protein KIAA1522 OS=Homo sapiens OX=9606 GN=KIAA1522 PE=1 SV=2	KIAA1522	107.09	1.642	1.363	1.27	1.349	1.435	1.419	0.793	1.687	0.73	0.676	0.752	0.139219
P15924	Desmoplakin OS=Homo sapiens OX=9606 GN=DSP PE=1 SV=3	DSP	331.77	1.027	1.374	0.926	2.285	1.184	1.607	0.648	0.785	0.613	1.364	0.738	0.2299
Q6ZQN7	Solute carrier organic anion transporter family member 4C1 OS=Homo sapiens OX=9606 GN=SLCO4C1 PE=1 SV=1	SLCO4C1	78.948	1.208	1.739	1.017	0.967	0.684	1.023	1.413	1.092	0.488	1.88	1.05	0.98604
O60610	Protein diaphanous homolog 1 OS=Homo sapiens OX=9606 GN=DIAPH1 PE=1 SV=2	DIAPH1	141.35	1.368	1.595	0.889	0.951	1.809	2.861	1.011	0.795	0.987	1.069	1.017	0.81556
O00401	Neural Wiskott-Aldrich syndrome protein OS=Homo sapiens OX=9606 GN=WASL PE=1 SV=2	WASL	54.826	1.732	1.227	1.292	1.176	1.349	1.137	0.823	0.69	1.063	1.513	0.771	0.095019
P49795	Regulator of G-protein signaling 19 OS=Homo sapiens OX=9606 GN=RGS19 PE=1 SV=1	RGS19	24.635	0.966	1.942	0.928	2.375	0.826	2.438	0.814	1.081	1.034	1.457	0.97	0.97022
Q9NRA2	Sialin OS=Homo sapiens OX=9606 GN=SLC17A5 PE=1 SV=2	SLC17A5	54.639	1.893	0.353	1.828	1.217	1.023	1.181	1.438	0.647	0.876	1.128	0.835	0.8454
P07814	Bifunctional glutamate/proline--tRNA ligase OS=Homo sapiens OX=9606 GN=EPRS PE=1 SV=5	EPRS	170.59	1.78	4.533	1.777			1.296	1.121	1.546			0.49	0.13042
P04114	Apolipoprotein B-100 OS=Homo sapiens OX=9606 GN=APOB PE=1 SV=2	APOB	515.6	0.64	0.445	0.309	0.409	0.263	2.008	0.396	3.484	0.607	2.695	4.448	0.026699
Q13443	Disintegrin and metalloproteinase domain-containing protein 9 OS=Homo sapiens OX=9606 GN=ADAM9 PE=1 SV=1	ADAM9	90.555	0.791	1.363	0.746	1.758	1.214	1.519	1.24	1.382	1.248	1.112	1.107	0.41162
O14894	Transmembrane 4 L6 family member 5 OS=Homo sapiens OX=9606 GN=TM4SF5 PE=1 SV=2	TM4SF5	20.822	1.371	0.266	1.081	1.244	0.518	2.196	0.18	0.209	0.096	0.207	0.645	0.143322
Q6PCB6	Alpha/beta hydrolase domain-containing protein 17C OS=Homo sapiens OX=9606 GN=ABHD17C PE=1 SV=2	ABHD17C	35.83	1.627	2.889	0.847			1.052	0.911	1.155			0.581	0.30282
Q99835	Smoothened homolog OS=Homo sapiens OX=9606 GN=SMO PE=1 SV=1	SMO	86.396	0.825	0.963	0.729	0.357	0.54	0.98	1.833	0.958	1.213	0.974	1.745	0.027084
P29728	2'-5'-oligoadenylate synthase 2 OS=Homo sapiens OX=9606 GN=OAS2 PE=1 SV=3	OAS2	82.43	3.086	8.867	2.048			1.133	0.882	0.577			0.185	0.033357
O43765	Small glutamine-rich tetratricopeptide repeat-containing protein alpha OS=Homo sapiens OX=9606 GN=SGTA PE=1 SV=1	SGTA	34.063	1.484	1.472	0.726			0.924	0.996	0.837			0.749	0.37666
Q99584	Protein S100-A13 OS=Homo sapiens OX=9606 GN=S100A13 PE=1 SV=1	S100A13	11.471	0.289	1.191	1.3	1.089	1.743	1.489	1.235	1.202	0.906	0.945	1.029	0.64834
Q9UNE7	E3 ubiquitin-protein ligase CHIP OS=Homo sapiens OX=9606 GN=STUB1 PE=1 SV=2	STUB1	34.856	1.855	0.727	1.042	0.744	0.96	0.991	0.539	0.304	0.311	0.641	0.523	0.040455
Q00722	"1-phosphatidylinositol 4,5-bisphosphate phosphodiesterase beta-2 OS=Homo sapiens OX=9606 GN=PLCB2 PE=1 SV=2"	PLCB2	134.02	2.897	4.301	3.301			0.745		1.064			0.258	0.0066045
P31431	Syndecan-4 OS=Homo sapiens OX=9606 GN=SDC4 PE=1 SV=2	SDC4	21.641	1.96	2.321	1.059	0.999	0.572	0.34	1.14	2.491	1.295	1.262	0.945	0.793
Q86WA8	"Lon protease homolog 2, peroxisomal OS=Homo sapiens OX=9606 GN=LONP2 PE=1 SV=1"	LONP2	94.615	0.477	5.253	0.06			2.233	0.864	0.452			0.613	0.69148
Q14651	Plastin-1 OS=Homo sapiens OX=9606 GN=PLS1 PE=1 SV=2	PLS1	70.253	0.818	0.744	1.578	0.99	1.645	0.906	1.091	0.997	1.36	0.897	0.909	0.77956
O94856	Neurofascin OS=Homo sapiens OX=9606 GN=NFASC PE=1 SV=4	NFASC	150.02	1.057	1.224	0.599	0.644	0.814	0.61	1.932	1.323	0.998	0.757	1.296	0.4117
O75955	Flotillin-1 OS=Homo sapiens OX=9606 GN=FLOT1 PE=1 SV=3	FLOT1	47.355	0.888	0.652	2.444	1.054	1.198	1.092	1.027	1.172	1.207	1.469	0.957	0.82696
Q9GZM7	Tubulointerstitial nephritis antigen-like OS=Homo sapiens OX=9606 GN=TINAGL1 PE=1 SV=1	TINAGL1	52.387				0.602	0.557				1.132	0.93	1.779	0.032477
Q9NUQ9	Protein FAM49B OS=Homo sapiens OX=9606 GN=FAM49B PE=1 SV=1	FAM49B	36.748	2.153	2.403	1.013			1.152	0.746	0.53			0.436	0.081957
P35580	Myosin-10 OS=Homo sapiens OX=9606 GN=MYH10 PE=1 SV=3	MYH10	229				0.867	0.6				0.806	0.61	0.965	0.9139
Q9HB71	Calcyclin-binding protein OS=Homo sapiens OX=9606 GN=CACYBP PE=1 SV=2	CACYBP	26.21	0.637	0.585	0.669			0.797	1.066	0.694			1.352	0.096123
O15031	Plexin-B2 OS=Homo sapiens OX=9606 GN=PLXNB2 PE=1 SV=3	PLXNB2	205.12	1.508	0.921	0.793	0.656	0.695	0.708	1.778	1.108	1.236	0.93	1.26	0.30834
Q9BRA2	Thioredoxin domain-containing protein 17 OS=Homo sapiens OX=9606 GN=TXNDC17 PE=1 SV=1	TXNDC17	13.941	1.331	0.767	0.862	0.457	1.256	1.029	1.812	1.021	1.038	1.33	1.333	0.177758
Q92888	Rho guanine nucleotide exchange factor 1 OS=Homo sapiens OX=9606 GN=ARHGEF1 PE=1 SV=2	ARHGEF1	102.43	1.011	1.223	0.654	0.949	0.855	1.233	1.046	1.105	0.847	0.932	1.1	0.40302
P19075	Tetraspanin-8 OS=Homo sapiens OX=9606 GN=TSPAN8 PE=1 SV=1	TSPAN8	26.044	0.82	0.98	0.814	0.88	1.445	0.86	1.458	1.287	1.032	1.001	1.142	0.35688
Q96HC4	PDZ and LIM domain protein 5 OS=Homo sapiens OX=9606 GN=PDLIM5 PE=1 SV=5	PDLIM5	63.944				0.869	1.307				1.345	0.857	1.012	0.98284
Q9BQE3	Tubulin alpha-1C chain OS=Homo sapiens OX=9606 GN=TUBA1C PE=1 SV=1	TUBA1C	49.895	2.411	0.902	1.605	0.352	0.463	0.332	1.042	0.713	0.856	1.177	0.719	0.70734
Q9ULZ3	Apoptosis-associated speck-like protein containing a CARD OS=Homo sapiens OX=9606 GN=PYCARD PE=1 SV=2	PYCARD	21.627				1.9	1.608				1.24	1.184	0.691	0.051542
P01860	Immunoglobulin heavy constant gamma 3 OS=Homo sapiens OX=9606 GN=IGHG3 PE=1 SV=2	IGHG3	41.287	0.47	0.487	0.257	1.512	0.879	2.915	0.382	2.838	0.936	1.247	2.307	0.150238
P54136	"Arginine--tRNA ligase, cytoplasmic OS=Homo sapiens OX=9606 GN=RARS PE=1 SV=2"	RARS	75.378	0.77	1.262	0.504			0.843	1.882	2.337			1.996	0.173596
Q53SF7	Cordon-bleu protein-like 1 OS=Homo sapiens OX=9606 GN=COBLL1 PE=1 SV=3	COBLL1	123.87	1.115	1.316	1.071	0.71	0.895	1.162	0.721	0.81	1.057	1.237	0.977	0.87746
Q96J02	E3 ubiquitin-protein ligase Itchy homolog OS=Homo sapiens OX=9606 GN=ITCH PE=1 SV=2	ITCH	102.8	1.559	0.943	0.896	1.257	1.652	0.896	1.022	1.038	0.973	1.126	0.801	0.21422
Q9HCH5	Synaptotagmin-like protein 2 OS=Homo sapiens OX=9606 GN=SYTL2 PE=1 SV=3	SYTL2	104.93	1.133	1.21	1.134	1.891	2.879	1.07	0.624	1.433	0.929	0.794	0.588	0.063996
O95336	6-phosphogluconolactonase OS=Homo sapiens OX=9606 GN=PGLS PE=1 SV=2	PGLS	27.547	0.879	1.044	1.06			0.507	0.849	1.277			0.883	0.52556
P04264	"Keratin, type II cytoskeletal 1 OS=Homo sapiens OX=9606 GN=KRT1 PE=1 SV=6"	KRT1	66.038	0.804	0.939	0.953			2.33	0.527	0.537			1.259	0.95854
P42566	Epidermal growth factor receptor substrate 15 OS=Homo sapiens OX=9606 GN=EPS15 PE=1 SV=2	EPS15	98.655	1.229	1.569	1.762			1.086	1.039	1.141			0.716	0.041862
Q00796	Sorbitol dehydrogenase OS=Homo sapiens OX=9606 GN=SORD PE=1 SV=4	SORD	38.324	0.53	1.032	0.862			0.59	1.419	0.489			1.031	0.90834
P15153	Ras-related C3 botulinum toxin substrate 2 OS=Homo sapiens OX=9606 GN=RAC2 PE=1 SV=1	RAC2	21.429	0.858	1.661	0.83	2.24	1.349	3.096	0.554	1.968	1.244	1.578	1.216	0.7284
Q92820	Gamma-glutamyl hydrolase OS=Homo sapiens OX=9606 GN=GGH PE=1 SV=2	GGH	35.964	0.415	1.026	0.68	0.712	0.483	0.517	0.806	1.116	1.672	1.748	1.767	0.097656
Q15274	Nicotinate-nucleotide pyrophosphorylase [carboxylating] OS=Homo sapiens OX=9606 GN=QPRT PE=1 SV=3	QPRT	30.845	3.198	3.65	5.015			2.475	1.232	1.938			0.476	0.035138
P08238	Heat shock protein HSP 90-beta OS=Homo sapiens OX=9606 GN=HSP90AB1 PE=1 SV=4	HSP90AB1	83.263	1.472	1.251	1.095	1.368	1.525	0.649	1.162	1.738	0.668	1.029	0.782	0.149616
Q5TDH0	Protein DDI1 homolog 2 OS=Homo sapiens OX=9606 GN=DDI2 PE=1 SV=1	DDI2	44.522	2.147	1.211	1.334			1.859	1.059	0.664			0.763	0.40072
P0DP04	Immunoglobulin heavy variable 3-43D OS=Homo sapiens OX=9606 GN=IGHV3-43D PE=3 SV=1	IGHV3-43D	13.017	0.481	0.5	0.99	0.967	0.739	2.703	0.636	3.529	1.645	0.665	2.496	0.093437
P13797	Plastin-3 OS=Homo sapiens OX=9606 GN=PLS3 PE=1 SV=4	PLS3	70.81	1.187	0.927	1.424	0.927	1.123	1.06	0.976	1.464	0.802	1.106	0.968	0.76754
O94886	CSC1-like protein 1 OS=Homo sapiens OX=9606 GN=TMEM63A PE=1 SV=3	TMEM63A	92.125				0.821	1.186				0.677	0.434	0.554	0.1735
Q9BR76	Coronin-1B OS=Homo sapiens OX=9606 GN=CORO1B PE=1 SV=1	CORO1B	54.234	1.127	0.699	1.548	0.589	1.584	0.694	1.26	1.887	0.584	0.892	0.959	0.85268
Q8TE82	SH3 domain and tetratricopeptide repeat-containing protein 1 OS=Homo sapiens OX=9606 GN=SH3TC1 PE=1 SV=3	SH3TC1	146.96	14.516	3.618	1.121			0.718	0.184				0.07	0.116145
O60331	Phosphatidylinositol 4-phosphate 5-kinase type-1 gamma OS=Homo sapiens OX=9606 GN=PIP5K1C PE=1 SV=2	PIP5K1C	73.259				1.112	0.987				1.222	0.985	1.051	0.74394
Q9Y639	Neuroplastin OS=Homo sapiens OX=9606 GN=NPTN PE=1 SV=2	NPTN	44.387	1.465	5.175	1.332	1.28	0.711	1.68	1.14	0.522	0.772	0.729	0.486	0.182738
Q9ULV0	Unconventional myosin-Vb OS=Homo sapiens OX=9606 GN=MYO5B PE=1 SV=3	MYO5B	213.67	1.103	1.157	2.475	0.974	1.524	1.423	1.1	1.409	0.916	0.557	0.747	0.26832
Q9BVG4	Protein PBDC1 OS=Homo sapiens OX=9606 GN=PBDC1 PE=1 SV=1	PBDC1	26.056	0.644	1.151	0.524			0.983	1.293	1.303			1.543	0.12882
Q06323	Proteasome activator complex subunit 1 OS=Homo sapiens OX=9606 GN=PSME1 PE=1 SV=1	PSME1	28.723	1.552	5.35	0.93	1.161	1.777	1.413	1.28	0.827	0.512	0.828	0.451	0.105065
P31939	Bifunctional purine biosynthesis protein PURH OS=Homo sapiens OX=9606 GN=ATIC PE=1 SV=3	ATIC	64.615				0.647	1.176				0.453	0.561	0.556	0.22614
P30041	Peroxiredoxin-6 OS=Homo sapiens OX=9606 GN=PRDX6 PE=1 SV=3	PRDX6	25.035	1.178	4.006	0.837	0.746	0.643	0.883	1.408	0.937	0.942	1.104	0.712	0.8061
P11234	Ras-related protein Ral-B OS=Homo sapiens OX=9606 GN=RALB PE=1 SV=1	RALB	23.408	0.458	0.718	0.414	1.21	1.944	0.892	1.922	0.876	1.051	1.045	1.22	0.3443
O75347	Tubulin-specific chaperone A OS=Homo sapiens OX=9606 GN=TBCA PE=1 SV=3	TBCA	12.855	3.69	2.31	1.125			1.489	0.964	0.78			0.454	0.143682
P63104	14-3-3 protein zeta/delta OS=Homo sapiens OX=9606 GN=YWHAZ PE=1 SV=1	YWHAZ	27.745	0.974	0.595	1.771	1.439	3.013	1.41	1.176	1.045	0.945	0.733	0.681	0.40012
Q8N468	Major facilitator superfamily domain-containing protein 4A OS=Homo sapiens OX=9606 GN=MFSD4A PE=2 SV=3	MFSD4A	56.265	3.094	0.481	0.883			0.164	1.728	0.904			0.627	0.57374
Q14247	Src substrate cortactin OS=Homo sapiens OX=9606 GN=CTTN PE=1 SV=2	CTTN	61.585	1.067	0.938	1.898	1.606	2.78	1.071	0.599	0.853	0.902	0.755	0.504	0.021497
A0A0B4J1V0	Immunoglobulin heavy variable 3-15 OS=Homo sapiens OX=9606 GN=IGHV3-15 PE=3 SV=1	IGHV3-15	12.926	0.609	3.4	0.336	0.423	5.299	2.527	0.801	3.518	0.928	0.41	0.813	0.87666
Q96LD4	E3 ubiquitin-protein ligase TRIM47 OS=Homo sapiens OX=9606 GN=TRIM47 PE=1 SV=2	TRIM47	69.531	1.165	1.045	1.142	0.772	0.84	1.389	1.837	0.943	0.428	0.993	1.126	0.92484
Q92817	Envoplakin OS=Homo sapiens OX=9606 GN=EVPL PE=1 SV=3	EVPL	231.6	0.638	0.673	1.623	0.928	3.395	2.045	0.678	1.176	1.745	0.543	0.853	0.867
P02745	Complement C1q subcomponent subunit A OS=Homo sapiens OX=9606 GN=C1QA PE=1 SV=2	C1QA	26.016	0.643	0.329	0.217	0.277	0.156	1.687	0.54	7.678	1.031	1.407	7.61	0.0090171
Q9BXT6	RNA helicase Mov10l1 OS=Homo sapiens OX=9606 GN=MOV10L1 PE=2 SV=1	MOV10L1	135.29	5.225	1.702	4.064			0.453	0.634	0.345			0.13	0.0067997
Q96I34	Protein phosphatase 1 regulatory subunit 16A OS=Homo sapiens OX=9606 GN=PPP1R16A PE=1 SV=1	PPP1R16A	57.811	1.39	1.042	1.23	1.018	1.318	0.921	1.326	1.234	0.906	1.051	0.907	0.3309
P02671	Fibrinogen alpha chain OS=Homo sapiens OX=9606 GN=FGA PE=1 SV=2	FGA	94.972	0.947	0.758	0.477	0.624	0.532	0.606	0.41	4.489	0.501	0.945	2.082	0.53004
P61158	Actin-related protein 3 OS=Homo sapiens OX=9606 GN=ACTR3 PE=1 SV=3	ACTR3	47.371	1.168	2.001	0.958	2.361	1.661	0.878	0.906	2.022	0.967	1.233	0.737	0.21906
O75410	Transforming acidic coiled-coil-containing protein 1 OS=Homo sapiens OX=9606 GN=TACC1 PE=1 SV=2	TACC1	87.793				0.785	0.341				0.737	1.583	2.06	0.32288
P60953	Cell division control protein 42 homolog OS=Homo sapiens OX=9606 GN=CDC42 PE=1 SV=2	CDC42	21.258	1.251	0.711	1.35	1.219	1.668	1.569	1.089	0.953	1.005	0.952	0.898	0.61018
Q9HB90	Ras-related GTP-binding protein C OS=Homo sapiens OX=9606 GN=RRAGC PE=1 SV=1	RRAGC	44.223	2.555	1.472	1.983	0.729	0.933	1.133	0.849	0.507	0.914	1.906	0.692	0.29096
P37837	Transaldolase OS=Homo sapiens OX=9606 GN=TALDO1 PE=1 SV=2	TALDO1	37.54	1.085	0.739	0.809	1.467	2.425	3.292	0.7	0.775	0.442	0.299	0.844	0.35174
P17987	T-complex protein 1 subunit alpha OS=Homo sapiens OX=9606 GN=TCP1 PE=1 SV=1	TCP1	60.343	1.295	1.347	0.954			0.639	0.921	1.201			0.768	0.25118
Q9HD89	Resistin OS=Homo sapiens OX=9606 GN=RETN PE=1 SV=1	RETN	11.419	2.917	2.019	0.638	4.219	0.78	1.17	1.961	0.527	0.312	1.128	0.482	0.2073
Q9UHD8	Septin-9 OS=Homo sapiens OX=9606 GN=SEPTIN9 PE=1 SV=2	SEPTIN9	65.401	1.13	1.187	1.728	1.15	2.337	1.714	0.865	0.953	1.336	1.079	0.79	0.27146
P61601	Neurocalcin-delta OS=Homo sapiens OX=9606 GN=NCALD PE=1 SV=2	NCALD	22.245	1.034	0.803	0.618	1.291	0.76	0.43	0.822	1.712	0.364	0.728	0.9	0.46976
Q9NRR8	CDC42 small effector protein 1 OS=Homo sapiens OX=9606 GN=CDC42SE1 PE=1 SV=1	CDC42SE1	8.9252				6.02	0.067				4.743	0.436	0.851	0.77866
Q9H223	EH domain-containing protein 4 OS=Homo sapiens OX=9606 GN=EHD4 PE=1 SV=1	EHD4	61.174	0.724	0.559	2.355	1.35	2.805	1.294	0.743	1.071	1.106	0.813	0.645	0.43694
P01133	Pro-epidermal growth factor OS=Homo sapiens OX=9606 GN=EGF PE=1 SV=2	EGF	133.99	0.863	0.707	0.61	0.269	0.309	0.575	0.855	4.292	0.717	0.566	2.54	0.173716
Q15907	Ras-related protein Rab-11B OS=Homo sapiens OX=9606 GN=RAB11B PE=1 SV=4	RAB11B	24.488	1.282	0.894	0.867			1.086	1.348	1.243			1.208	0.22456
Q6P4A8	Phospholipase B-like 1 OS=Homo sapiens OX=9606 GN=PLBD1 PE=1 SV=2	PLBD1	63.254	0.536	0.906	1.633	2.288	0.559	8.446	0.955	0.871	0.319	0.482	1.87	0.98466
O95154	Aflatoxin B1 aldehyde reductase member 3 OS=Homo sapiens OX=9606 GN=AKR7A3 PE=1 SV=2	AKR7A3	37.206	0.83	0.723	0.884			0.629	1.312	1.452			1.392	0.37164
P20020	Plasma membrane calcium-transporting ATPase 1 OS=Homo sapiens OX=9606 GN=ATP2B1 PE=1 SV=4	ATP2B1	134.68	2.1	2.005	1.027			0.967	1.127	0.971			0.597	0.118285
P62937	Peptidyl-prolyl cis-trans isomerase A OS=Homo sapiens OX=9606 GN=PPIA PE=1 SV=2	PPIA	18.012	1.026	1.016	1.544	0.732	0.895	0.852	0.894	1.124	1.212	1.006	0.976	0.9888
Q7Z3E5	LisH domain-containing protein ARMC9 OS=Homo sapiens OX=9606 GN=ARMC9 PE=1 SV=3	ARMC9	91.818	1.667	3.021	1.397	0.412	0.567	1.054	0.831	1.474	0.848	1.51	0.809	0.99766
P15121	Aldo-keto reductase family 1 member B1 OS=Homo sapiens OX=9606 GN=AKR1B1 PE=1 SV=3	AKR1B1	35.853	1.17	0.517	0.763	0.843	0.812	0.456	1.041	2.04	0.837	1.344	1.393	0.4047
Q8NHX9	Two pore calcium channel protein 2 OS=Homo sapiens OX=9606 GN=TPCN2 PE=1 SV=2	TPCN2	85.242				0.903	1.086				0.735	1.207	0.976	0.86728
Q9BY43	Charged multivesicular body protein 4a OS=Homo sapiens OX=9606 GN=CHMP4A PE=1 SV=3	CHMP4A	25.098	1.847	0.761	1.451	1.051	1.128	0.682	0.534	1.26	0.971	1.184	0.742	0.20872
Q10589	Bone marrow stromal antigen 2 OS=Homo sapiens OX=9606 GN=BST2 PE=1 SV=1	BST2	19.769	0.589	0.881	0.917			0.636	2.084	1.407			1.729	0.29326
A0A075B6K4	Immunoglobulin lambda variable 3-10 OS=Homo sapiens OX=9606 GN=IGLV3-10 PE=3 SV=2	IGLV3-10	12.441	0.34	0.421	1.378	0.782	3.69	5.015	0.48	1.511	0.728	0.783	1.288	0.67538
P04180	Phosphatidylcholine-sterol acyltransferase OS=Homo sapiens OX=9606 GN=LCAT PE=1 SV=1	LCAT	49.577	1.166	1.089	0.57	1.125	0.31	1.494	1.198	1.413	2.214	1.977	1.947	0.02846
Q9UBR2	Cathepsin Z OS=Homo sapiens OX=9606 GN=CTSZ PE=1 SV=1	CTSZ	33.868	0.473	0.879	0.776	0.303	0.145	0.977	1.218	1.371	2.295	1.119	2.71	0.0135366
P17931	Galectin-3 OS=Homo sapiens OX=9606 GN=LGALS3 PE=1 SV=5	LGALS3	26.152	0.652	0.654	1.319			1.198	1	0.943			1.197	0.3967
O75923	Dysferlin OS=Homo sapiens OX=9606 GN=DYSF PE=1 SV=1	DYSF	237.29				2.443	0.653				1.264	1.322	0.835	0.97764
Q07654	Trefoil factor 3 OS=Homo sapiens OX=9606 GN=TFF3 PE=1 SV=2	TFF3	10.181	2.219	1.151	1.327			2.794	0.877	0.286			0.842	0.48736
P04003	C4b-binding protein alpha chain OS=Homo sapiens OX=9606 GN=C4BPA PE=1 SV=2	C4BPA	67.033	0.636	0.74	0.406	0.52	0.59	0.739	0.348	5.03	0.807	2.624	3.302	0.191396
Q13905	Rap guanine nucleotide exchange factor 1 OS=Homo sapiens OX=9606 GN=RAPGEF1 PE=1 SV=3	RAPGEF1	120.55	2.995	0.3	0.337			0.671	1.121	1.473			0.899	0.6102
P53990	IST1 homolog OS=Homo sapiens OX=9606 GN=IST1 PE=1 SV=1	IST1	39.75	1.32	0.803	1.229	0.702	0.871	0.912	1.319	1.009	1.014	1.137	1.095	0.4378
A0A0B4J1U7	Immunoglobulin heavy variable 6-1 OS=Homo sapiens OX=9606 GN=IGHV6-1 PE=3 SV=1	IGHV6-1	13.481	0.749	2.124	0.351	1.078	5.411	4.3	0.771	0.884	0.62	0.61	0.74	0.7251
O75886	Signal transducing adapter molecule 2 OS=Homo sapiens OX=9606 GN=STAM2 PE=1 SV=1	STAM2	58.164	2.557	1.532	1.295			1.197	0.62	0.226			0.379	0.096916
P43251	Biotinidase OS=Homo sapiens OX=9606 GN=BTD PE=1 SV=2	BTD	61.132				0.463	0.486				1.315	1.084	2.528	0.0114403
Q9UKL6	Phosphatidylcholine transfer protein OS=Homo sapiens OX=9606 GN=PCTP PE=1 SV=1	PCTP	24.843	1.674	0.787	1.018			1.495	1.988	0.554			1.16	0.8856
Q8IUW5	RELT-like protein 1 OS=Homo sapiens OX=9606 GN=RELL1 PE=1 SV=1	RELL1	29.34				1.326	0.953				0.796	1.103	0.833	0.51494
P0C0L5	Complement C4-B OS=Homo sapiens OX=9606 GN=C4B PE=1 SV=2	C4B	192.75	0.756	0.664	0.278	0.497	0.45	0.663	0.49	3.84	0.583	1.842	2.805	0.120378
P21810	Biglycan OS=Homo sapiens OX=9606 GN=BGN PE=1 SV=2	BGN	41.654	1.125	1.571	0.874			0.41	0.648	3.138			1.175	0.76394
Q86Y34	Adhesion G protein-coupled receptor G3 OS=Homo sapiens OX=9606 GN=ADGRG3 PE=1 SV=1	ADGRG3	60.86	0.685	1.41	0.508	2.745	1.461	9.504	0.341	0.279	0.671	0.697	1.688	0.67192
Q9UK73	Protein fem-1 homolog B OS=Homo sapiens OX=9606 GN=FEM1B PE=1 SV=1	FEM1B	70.263				0.262	0.193				0.717	1.341	4.523	0.051661
P61019	Ras-related protein Rab-2A OS=Homo sapiens OX=9606 GN=RAB2A PE=1 SV=1	RAB2A	23.545	0.715	1.01	1.13	1.395	1.407	0.925	1.093	0.895	0.836	0.88	0.818	0.22234
O95834	Echinoderm microtubule-associated protein-like 2 OS=Homo sapiens OX=9606 GN=EML2 PE=1 SV=1	EML2	70.678	1.613	2.911	1.413	1.005	1.266	1.112	1.037	1.061	0.688	0.703	0.561	0.033501
Q8NEF3	Coiled-coil domain-containing protein 112 OS=Homo sapiens OX=9606 GN=CCDC112 PE=1 SV=2	CCDC112	53.564				8.519	0.483				0.413	0.387	0.089	0.46078
Q7Z403	Transmembrane channel-like protein 6 OS=Homo sapiens OX=9606 GN=TMC6 PE=1 SV=2	TMC6	90.044				5.567	0.885				1.251	1.063	0.359	0.55164
O60828	Polyglutamine-binding protein 1 OS=Homo sapiens OX=9606 GN=PQBP1 PE=1 SV=1	PQBP1	30.472	1.586	1.364	0.986			9.351	0.668	0.283			2.617	0.95834
Q14571	"Inositol 1,4,5-trisphosphate receptor type 2 OS=Homo sapiens OX=9606 GN=ITPR2 PE=1 SV=2"	ITPR2	308.06	2.939	3.423	1.627			1.552	0.658	0.384			0.325	0.055742
Q969T9	WW domain-binding protein 2 OS=Homo sapiens OX=9606 GN=WBP2 PE=1 SV=1	WBP2	28.087	1.021	0.85	0.7			0.984	1.3	0.683			1.154	0.60468
Q13057	Bifunctional coenzyme A synthase OS=Homo sapiens OX=9606 GN=COASY PE=1 SV=4	COASY	62.328	1.173	1.559	1.127			0.991	1.456	1.187			0.942	0.70368
Q9NS93	Transmembrane 7 superfamily member 3 OS=Homo sapiens OX=9606 GN=TM7SF3 PE=2 SV=1	TM7SF3	64.166	1.017	0.681	2.698	0.625	0.906	0.63	0.821	0.677	1.35	1.724	0.878	0.8773
C9J7I0	UBAP1-MVB12-associated (UMA)-domain containing protein 1 OS=Homo sapiens OX=9606 GN=UMAD1 PE=2 SV=2	UMAD1	15.2	0.453	1.917	0.414	0.595	0.516	1.289	1.579	1.029	1.261	1.048	1.593	0.090738
Q9NZZ3	Charged multivesicular body protein 5 OS=Homo sapiens OX=9606 GN=CHMP5 PE=1 SV=1	CHMP5	24.57	1.735	1.127	1.18	0.575	0.843	0.731	1.232	0.676	0.846	0.917	0.806	0.43894
P78324	Tyrosine-protein phosphatase non-receptor type substrate 1 OS=Homo sapiens OX=9606 GN=SIRPA PE=1 SV=2	SIRPA	54.966	0.937	1.114	0.421	1.931	0.509	1.861	1.677	1.14	0.812	0.714	1.263	0.3769
Q9UHN6	Cell surface hyaluronidase OS=Homo sapiens OX=9606 GN=CEMIP2 PE=1 SV=1	CEMIP2	154.37	0.552	0.309	0.329			0.678	1.077	0.636			2.009	0.046661
P36969	Phospholipid hydroperoxide glutathione peroxidase OS=Homo sapiens OX=9606 GN=GPX4 PE=1 SV=3	GPX4	22.174	1.564	0.609	0.701	1.096	0.784	0.813	1.751	1.017	1.192	0.791	1.17	0.46078
P20042	Eukaryotic translation initiation factor 2 subunit 2 OS=Homo sapiens OX=9606 GN=EIF2S2 PE=1 SV=2	EIF2S2	38.388	1.004	2.523	0.446			0.754	1.057	0.782			0.653	0.71824
P48061	Stromal cell-derived factor 1 OS=Homo sapiens OX=9606 GN=CXCL12 PE=1 SV=1	CXCL12	10.666				0.657	0.582				1.164	0.371	1.239	0.92538
P54727	UV excision repair protein RAD23 homolog B OS=Homo sapiens OX=9606 GN=RAD23B PE=1 SV=1	RAD23B	43.171	1.61	1.645	1.328	1.352	1.48	3.333	1.356	1.051	0.955	0.522	0.973	0.51436
P15309	Prostatic acid phosphatase OS=Homo sapiens OX=9606 GN=ACPP PE=1 SV=3	ACPP	44.566	0.64	2.285	0.32	0.727	0.368	1.449	2.461	0.344	1.121	0.41	1.333	0.57304
O60343	TBC1 domain family member 4 OS=Homo sapiens OX=9606 GN=TBC1D4 PE=1 SV=2	TBC1D4	146.56	1.832	1.338	1.88			2.209	1.304	1.293			0.952	0.75028
Q9NQ48	Leucine zipper transcription factor-like protein 1 OS=Homo sapiens OX=9606 GN=LZTFL1 PE=1 SV=1	LZTFL1	34.592				0.674	0.799				1.062	1.233	1.558	0.059196
Q92692	Nectin-2 OS=Homo sapiens OX=9606 GN=NECTIN2 PE=1 SV=1	NECTIN2	57.741	0.833	0.97	0.577	0.732	0.888	1.178	1.682	1.13	1.597	1.039	1.656	0.0053778
Q9Y490	Talin-1 OS=Homo sapiens OX=9606 GN=TLN1 PE=1 SV=3	TLN1	269.76	1.17	1.074	0.953	1.531	1.267	0.968	0.753	2.074	0.807	1.053	0.943	0.56448
Q8N695	Sodium-coupled monocarboxylate transporter 1 OS=Homo sapiens OX=9606 GN=SLC5A8 PE=1 SV=2	SLC5A8	66.577				0.579	0.579				1.844	1.018	2.472	0.1012
Q15828	Cystatin-M OS=Homo sapiens OX=9606 GN=CST6 PE=1 SV=1	CST6	16.511	1.347	2.042	0.602	0.579	0.432	2.662	1.593	0.901	0.615	0.337	1.221	0.78688
Q14C86	GTPase-activating protein and VPS9 domain-containing protein 1 OS=Homo sapiens OX=9606 GN=GAPVD1 PE=1 SV=2	GAPVD1	164.98				0.724	0.576				2.055	0.708	2.125	0.37024
P00491	Purine nucleoside phosphorylase OS=Homo sapiens OX=9606 GN=PNP PE=1 SV=2	PNP	32.118	0.954	1.023	1.985	1.148	0.786	1.561	0.952	1.231	0.748	1.488	1.014	0.88748
Q8N2S1	Latent-transforming growth factor beta-binding protein 4 OS=Homo sapiens OX=9606 GN=LTBP4 PE=1 SV=2	LTBP4	173.43				1.693	1.425				0.962	1.751	0.87	0.62256
Q9UHI8	A disintegrin and metalloproteinase with thrombospondin motifs 1 OS=Homo sapiens OX=9606 GN=ADAMTS1 PE=1 SV=4	ADAMTS1	105.36				0.298	0.65				0.831	0.898	1.824	0.2274
P21399	Cytoplasmic aconitate hydratase OS=Homo sapiens OX=9606 GN=ACO1 PE=1 SV=3	ACO1	98.398	1.319	1.003	1.132	0.672	0.911	0.77	1.198	1.07	0.832	1.278	1.022	0.8624
Q96CX2	BTB/POZ domain-containing protein KCTD12 OS=Homo sapiens OX=9606 GN=KCTD12 PE=1 SV=1	KCTD12	35.7	2.101	1.286	1.248	1.156	0.847	0.739	0.596	0.978	0.878	0.84	0.607	0.024256
Q9Y617	Phosphoserine aminotransferase OS=Homo sapiens OX=9606 GN=PSAT1 PE=1 SV=2	PSAT1	40.422	0.704	0.576	0.709	1.072	0.935	0.796	1.328	0.69	0.528	0.572	0.979	0.79222
P57772	Selenocysteine-specific elongation factor OS=Homo sapiens OX=9606 GN=EEFSEC PE=1 SV=4	EEFSEC	65.304	3.09	1.197	1.412			2.388	0.53	0.611			0.619	0.32052
Q13201	Multimerin-1 OS=Homo sapiens OX=9606 GN=MMRN1 PE=1 SV=3	MMRN1	138.11	1.142	0.967	1.182			1.671	1.011	1.226			1.187	0.38774
P31689	DnaJ homolog subfamily A member 1 OS=Homo sapiens OX=9606 GN=DNAJA1 PE=1 SV=2	DNAJA1	44.868	2.229	1.031	1.924			1.208	1.057	1.18			0.665	0.209
Q9BRK5	45 kDa calcium-binding protein OS=Homo sapiens OX=9606 GN=SDF4 PE=1 SV=1	SDF4	41.806	1.917	1.256	1.559			0.432	0.561	3.123			0.87	0.44612
Q86WC4	Osteopetrosis-associated transmembrane protein 1 OS=Homo sapiens OX=9606 GN=OSTM1 PE=1 SV=1	OSTM1	37.256				0.633	1.094				0.641	1.271	1.107	0.86998
P15586	N-acetylglucosamine-6-sulfatase OS=Homo sapiens OX=9606 GN=GNS PE=1 SV=3	GNS	62.081	1.175	1.294	1.672	1.328	0.873	0.886	1.64	0.95	1.08	1.16	0.901	0.49824
Q96G03	Phosphoglucomutase-2 OS=Homo sapiens OX=9606 GN=PGM2 PE=1 SV=4	PGM2	68.283	1.666	4.478	1.415			0.845	1.118	1.026			0.395	0.097397
O75348	V-type proton ATPase subunit G 1 OS=Homo sapiens OX=9606 GN=ATP6V1G1 PE=1 SV=3	ATP6V1G1	13.757	3.898	2.631	2.053	2.737	1.181	2.086	0.312	0.95	0.268	0.4	0.321	0.0128358
P01903	"HLA class II histocompatibility antigen, DR alpha chain OS=Homo sapiens OX=9606 GN=HLA-DRA PE=1 SV=1"	HLA-DRA	28.607	0.595	1.101	1.198	1.63	1.516	0.844	0.747	0.68	0.903	2.593	0.955	0.67366
P42345	Serine/threonine-protein kinase mTOR OS=Homo sapiens OX=9606 GN=MTOR PE=1 SV=1	MTOR	288.89	1.76	2.66	1.266				0.55	0.385			0.247	0.021077
Q9UM54	Unconventional myosin-VI OS=Homo sapiens OX=9606 GN=MYO6 PE=1 SV=4	MYO6	149.69	1.139	1.123	1.3	0.789	0.815	1.197	1.324	0.939	1.346	1.311	1.184	0.171717
P00749	Urokinase-type plasminogen activator OS=Homo sapiens OX=9606 GN=PLAU PE=1 SV=2	PLAU	48.507				0.552	0.781				2.107	0.919	2.27	0.23682
Q96A05	V-type proton ATPase subunit E 2 OS=Homo sapiens OX=9606 GN=ATP6V1E2 PE=1 SV=1	ATP6V1E2	26.074				0.974	0.518				1.107	0.976	1.396	0.35848
P53396	ATP-citrate synthase OS=Homo sapiens OX=9606 GN=ACLY PE=1 SV=3	ACLY	120.84	1.543	0.904	0.796	0.803	0.721	0.877	1.392	1.32	1.167	0.867	1.18	0.3009
P05154	Plasma serine protease inhibitor OS=Homo sapiens OX=9606 GN=SERPINA5 PE=1 SV=3	SERPINA5	45.674	1.16	1.72	0.893	0.987	0.878	0.745	1.393	1.311	1.466	1.096	1.066	0.70104
O15393	Transmembrane protease serine 2 OS=Homo sapiens OX=9606 GN=TMPRSS2 PE=1 SV=3	TMPRSS2	53.859	0.927	1.271	1.193	1.242	2.515	1.485	1.251	0.842	1.386	0.814	0.808	0.40876
O43396	Thioredoxin-like protein 1 OS=Homo sapiens OX=9606 GN=TXNL1 PE=1 SV=3	TXNL1	32.251	1.816	5.734	1.371			0.631	0.879	0.811			0.26	0.062162
Q96GA7	Serine dehydratase-like OS=Homo sapiens OX=9606 GN=SDSL PE=1 SV=1	SDSL	34.674	0.545	1.105	0.806			0.358	1.806	1.799			1.614	0.6398
P40818	Ubiquitin carboxyl-terminal hydrolase 8 OS=Homo sapiens OX=9606 GN=USP8 PE=1 SV=1	USP8	127.52	1.017	1.525	1.463			0.999	0.924	0.633			0.638	0.076836
P09210	Glutathione S-transferase A2 OS=Homo sapiens OX=9606 GN=GSTA2 PE=1 SV=4	GSTA2	25.664				1.184	0.819				0.589	1.439	1.012	0.90198
Q9NR99	Matrix-remodeling-associated protein 5 OS=Homo sapiens OX=9606 GN=MXRA5 PE=1 SV=3	MXRA5	312.15	1.391	2.647	0.453			1.303	0.905	2.769			1.108	0.73296
Q9UEU0	Vesicle transport through interaction with t-SNAREs homolog 1B OS=Homo sapiens OX=9606 GN=VTI1B PE=1 SV=3	VTI1B	26.688	1.799	1.515	1.385			1.346	0.997	0.8			0.669	0.068403
O94973	AP-2 complex subunit alpha-2 OS=Homo sapiens OX=9606 GN=AP2A2 PE=1 SV=2	AP2A2	103.96	0.387	0.638	1.886			0.806	1.599	1.217			1.244	0.47024
Q99880	Histone H2B type 1-L OS=Homo sapiens OX=9606 GN=H2BC13 PE=1 SV=3	H2BC13	13.952	0.273	0.129	0.159	4.06	1.066	0.228	0.109	1.157	0.748	2.036	0.752	0.89184
Q06495	Sodium-dependent phosphate transport protein 2A OS=Homo sapiens OX=9606 GN=SLC34A1 PE=1 SV=1	SLC34A1	68.937	1.967	1.487	1.431	1.981	2.875	1.908	0.99	0.7	1.833	0.249	0.583	0.099161
P81605	Dermcidin OS=Homo sapiens OX=9606 GN=DCD PE=1 SV=2	DCD	11.284	0.948	2.568	1.093	0.912	1.463	1.818	1.179	0.708	0.722	0.359	0.685	0.22288
P63244	Receptor of activated protein C kinase 1 OS=Homo sapiens OX=9606 GN=RACK1 PE=1 SV=3	RACK1	35.076	0.845	1.339	0.504	0.908	0.515	0.679	1.277	2.264	0.979	1.445	1.616	0.1241
P14324	Farnesyl pyrophosphate synthase OS=Homo sapiens OX=9606 GN=FDPS PE=1 SV=4	FDPS	48.275	1.31	1.417	1.082	0.865	1.432	1.243	1.322	0.831	1.094	1.11	0.917	0.534
P53801	Pituitary tumor-transforming gene 1 protein-interacting protein OS=Homo sapiens OX=9606 GN=PTTG1IP PE=1 SV=1	PTTG1IP	20.324				0.677	0.686				0.233	0.771	0.737	0.5729
O95747	Serine/threonine-protein kinase OSR1 OS=Homo sapiens OX=9606 GN=OXSR1 PE=1 SV=1	OXSR1	58.022	1.848	1.311	1.36	1.02	1.043		0.621	0.587	0.885	0.72	0.534	0.0040013
P07148	"Fatty acid-binding protein, liver OS=Homo sapiens OX=9606 GN=FABP1 PE=1 SV=1"	FABP1	14.208	1.659	0.941	0.803	1.391	0.797	0.904	1.364	0.565	1.356	0.846	0.901	0.63232
P68871	Hemoglobin subunit beta OS=Homo sapiens OX=9606 GN=HBB PE=1 SV=2	HBB	15.998	0.34	0.794	0.352	0.583	1.11	0.136	0.686	1.481	0.349	3.951	2.077	0.72622
P58546	Myotrophin OS=Homo sapiens OX=9606 GN=MTPN PE=1 SV=2	MTPN	12.895	1.824	3.044	1.357			1.214	0.747	0.47			0.391	0.057116
Q14508	WAP four-disulfide core domain protein 2 OS=Homo sapiens OX=9606 GN=WFDC2 PE=1 SV=2	WFDC2	12.993	0.697	4.954	0.724	1.277	0.809	1.889	1.807	0.692	1.227	0.718	0.748	0.922
O14907	Tax1-binding protein 3 OS=Homo sapiens OX=9606 GN=TAX1BP3 PE=1 SV=2	TAX1BP3	13.735	0.564	0.915	1.803			0.986	1.086	1.31			1.03	0.71362
O95219	Sorting nexin-4 OS=Homo sapiens OX=9606 GN=SNX4 PE=1 SV=1	SNX4	51.908	1.042	0.941	0.512	0.861	0.341	0.728	1.887	0.78	1.178	1.213	1.565	0.125084
Q04828	Aldo-keto reductase family 1 member C1 OS=Homo sapiens OX=9606 GN=AKR1C1 PE=1 SV=1	AKR1C1	36.788	0.857	1.471	1.006			0.878	1.272	1.866			1.205	0.57324
P33176	Kinesin-1 heavy chain OS=Homo sapiens OX=9606 GN=KIF5B PE=1 SV=1	KIF5B	109.68	1.741	5.094	1.16	0.644	0.873	0.964	1.03	0.799	0.882	1.058	0.498	0.32018
P02790	Hemopexin OS=Homo sapiens OX=9606 GN=HPX PE=1 SV=2	HPX	51.676	0.972	0.528	0.412	0.716	0.366	1.049	0.656	4.078	0.963	1.858	2.874	0.038715
Q9ULI3	Protein HEG homolog 1 OS=Homo sapiens OX=9606 GN=HEG1 PE=1 SV=3	HEG1	147.46				0.708	0.692				0.377	0.792	0.835	0.6256
P98172	Ephrin-B1 OS=Homo sapiens OX=9606 GN=EFNB1 PE=1 SV=1	EFNB1	38.006	1.33	1.38	0.706			1.204	1.327	1.334			1.131	0.52964
P17900	Ganglioside GM2 activator OS=Homo sapiens OX=9606 GN=GM2A PE=1 SV=4	GM2A	20.838	0.369	0.454	0.783	0.748	0.726	1.107	1.895	0.544	1.72	1.276	2.124	0.02922
P49006	MARCKS-related protein OS=Homo sapiens OX=9606 GN=MARCKSL1 PE=1 SV=2	MARCKSL1	19.529	1.421	1.704	3.21	1.773	6.497	1.403	0.436	0.444	1.124	0.362	0.258	0.0092999
P09936	Ubiquitin carboxyl-terminal hydrolase isozyme L1 OS=Homo sapiens OX=9606 GN=UCHL1 PE=1 SV=2	UCHL1	24.824	1.08	0.949	1.37	0.947	0.426	0.85	0.655	1.231	1.2	0.938	1.021	0.794
Q9NY25	C-type lectin domain family 5 member A OS=Homo sapiens OX=9606 GN=CLEC5A PE=1 SV=1	CLEC5A	21.521	0.631	0.576	0.618	4.965	0.66	3.386	0.618	0.965	1.397	0.983	0.986	0.6134
P04062	Lysosomal acid glucosylceramidase OS=Homo sapiens OX=9606 GN=GBA PE=1 SV=3	GBA	59.716				0.648	0.852				1.51	1.122	1.755	0.108944
Q9NVA2	Septin-11 OS=Homo sapiens OX=9606 GN=SEPTIN11 PE=1 SV=3	SEPTIN11	49.398	0.828	0.756	1.224	1.203	1.869	1.073	1.426	1.374	1.198	1.078	1.046	0.6111
Q96PD5	N-acetylmuramoyl-L-alanine amidase OS=Homo sapiens OX=9606 GN=PGLYRP2 PE=1 SV=1	PGLYRP2	62.216	3.681	2.603	3.612			0.686	0.641	0.784			0.213	0.0002643
O75363	Breast carcinoma-amplified sequence 1 OS=Homo sapiens OX=9606 GN=BCAS1 PE=1 SV=2	BCAS1	61.708	1.702	2.268	1.925	1.019	8.965	2.288	0.532	0.431	1.132	0.415	0.302	0.051421
Q9Y247	Protein FAM50B OS=Homo sapiens OX=9606 GN=FAM50B PE=1 SV=1	FAM50B	38.708				1.344	1.151				0.939	1.411	0.942	0.75618
Q13642	Four and a half LIM domains protein 1 OS=Homo sapiens OX=9606 GN=FHL1 PE=1 SV=4	FHL1	36.263	1.288	0.823	0.716			0.836	2.253	1.428			1.598	0.27876
Q9Y2Q5	Ragulator complex protein LAMTOR2 OS=Homo sapiens OX=9606 GN=LAMTOR2 PE=1 SV=1	LAMTOR2	13.507	1.041	1.512	1.383	1.64	1.587	0.85	1.117	0.805	0.848	1.743	0.749	0.088355
Q9UQC9	Calcium-activated chloride channel regulator 2 OS=Homo sapiens OX=9606 GN=CLCA2 PE=1 SV=2	CLCA2	103.94	3.039	1.249	1.395			1.267	2.41	1.104			0.841	0.70424
Q9H7D0	Dedicator of cytokinesis protein 5 OS=Homo sapiens OX=9606 GN=DOCK5 PE=1 SV=3	DOCK5	215.31				1.193	2.354				1.65	0.837	0.701	0.5369
P84101	Small EDRK-rich factor 2 OS=Homo sapiens OX=9606 GN=SERF2 PE=1 SV=1	SERF2	6.8998				1.548	3.012				0.608	0.868	0.324	0.102003
Q02156	Protein kinase C epsilon type OS=Homo sapiens OX=9606 GN=PRKCE PE=1 SV=1	PRKCE	83.673	1.015	1.61	0.751			0.834	1.012	0.974			0.835	0.5918
Q13576	Ras GTPase-activating-like protein IQGAP2 OS=Homo sapiens OX=9606 GN=IQGAP2 PE=1 SV=4	IQGAP2	180.58	0.648	0.563	0.478	0.492	0.604	0.889	1.954	1.052	0.812	1.247	2.138	0.0025644
P24298	Alanine aminotransferase 1 OS=Homo sapiens OX=9606 GN=GPT PE=1 SV=3	GPT	54.636	1.148	0.736	0.824	1.876	1.725	0.304	0.989	0.718	0.799	1.349	0.659	0.184378
P08582	Melanotransferrin OS=Homo sapiens OX=9606 GN=MELTF PE=1 SV=2	MELTF	80.214	0.964	0.926	0.918	0.684	0.74	0.664	1.151	1.24	1.098	1.451	1.324	0.120259
Q96I24	Far upstream element-binding protein 3 OS=Homo sapiens OX=9606 GN=FUBP3 PE=1 SV=2	FUBP3	61.64	0.502	0.202	0.314			0.182	0.047	0.019			0.244	0.067659
Q8IWW6	Rho GTPase-activating protein 12 OS=Homo sapiens OX=9606 GN=ARHGAP12 PE=1 SV=1	ARHGAP12	96.253	0.58	3.084	0.459	1.394	2.833	1.483	0.967	0.874	0.51	0.552	0.525	0.34178
P21333	Filamin-A OS=Homo sapiens OX=9606 GN=FLNA PE=1 SV=4	FLNA	280.74	0.759	2.219	0.653	0.811	0.472	3.188	0.691	0.271	1.21	0.952	1.284	0.84206
Q13563	Polycystin-2 OS=Homo sapiens OX=9606 GN=PKD2 PE=1 SV=3	PKD2	109.69	1.571	1.278	0.702	0.489	0.773	0.519	1.177	0.907	0.818	0.99	0.916	0.89478
P62805	Histone H4 OS=Homo sapiens OX=9606 GN=H4C1 PE=1 SV=2	H4C1	11.367	0.277	0.474	0.153	0.816	1.563	0.277	0.099	1.051	1.344	4.163	2.112	0.64392
Q15113	Procollagen C-endopeptidase enhancer 1 OS=Homo sapiens OX=9606 GN=PCOLCE PE=1 SV=2	PCOLCE	47.972	0.973	1.419	0.982			0.896	0.816	0.761			0.733	0.089324
P04080	Cystatin-B OS=Homo sapiens OX=9606 GN=CSTB PE=1 SV=2	CSTB	11.139	1.35	0.714	1.932	2.458	4.931	0.9	0.624	0.685	0.688	1.019	0.344	0.05662
P30086	Phosphatidylethanolamine-binding protein 1 OS=Homo sapiens OX=9606 GN=PEBP1 PE=1 SV=3	PEBP1	21.057	0.711	0.847	1.233	0.951	0.886	0.63	1.214	0.704	0.88	0.909	0.937	0.61978
Q9UHR4	Brain-specific angiogenesis inhibitor 1-associated protein 2-like protein 1 OS=Homo sapiens OX=9606 GN=BAIAP2L1 PE=1 SV=2	BAIAP2L1	56.882	1.141	0.899	1.466	1.208	3.06	1.114	0.644	1.061	1.127	0.765	0.606	0.110277
P48643	T-complex protein 1 subunit epsilon OS=Homo sapiens OX=9606 GN=CCT5 PE=1 SV=1	CCT5	59.67	1.167	1.006	0.869	0.706	0.638	0.865	1.547	1.638	0.964	1.36	1.453	0.062357
Q12860	Contactin-1 OS=Homo sapiens OX=9606 GN=CNTN1 PE=1 SV=1	CNTN1	113.32	1.431	1.293	1.153	0.336	0.402	0.548	1.791	1.649	0.789	0.806	1.21	0.52798
Q92930	Ras-related protein Rab-8B OS=Homo sapiens OX=9606 GN=RAB8B PE=1 SV=2	RAB8B	23.584	0.524	0.749	2.395	0.951	1.58	0.724	0.34	0.813	1.139	1.471	0.724	0.45552
P52943	Cysteine-rich protein 2 OS=Homo sapiens OX=9606 GN=CRIP2 PE=1 SV=1	CRIP2	22.492	0.688	1.289	5.9	1.288	3.342	0.335	0.278	0.843	1.001	0.765	0.258	0.033685
P35579	Myosin-9 OS=Homo sapiens OX=9606 GN=MYH9 PE=1 SV=4	MYH9	226.53	0.764	2.36	0.706	1.504	0.896	1.38	1.277	1.548	1.034	0.923	0.989	0.74518
Q5T9C2	Protein FAM102A OS=Homo sapiens OX=9606 GN=FAM102A PE=1 SV=2	FAM102A	41.784	0.971	0.482	1.458			2.339	0.847	1.085			1.467	0.4385
P13726	Tissue factor OS=Homo sapiens OX=9606 GN=F3 PE=1 SV=1	F3	33.067	0.498	1.364	0.246			1.01	2.366	1.851			2.48	0.12182
P36405	ADP-ribosylation factor-like protein 3 OS=Homo sapiens OX=9606 GN=ARL3 PE=1 SV=2	ARL3	20.455	0.666	1.261	1.524				0.722	0.802			0.662	0.35486
Q9Y4E1	WASH complex subunit 2C OS=Homo sapiens OX=9606 GN=WASHC2C PE=1 SV=4	WASHC2C	144.91	1.151	2.789	0.664			0.602	1.029	0.609			0.487	0.27238
P24666	Low molecular weight phosphotyrosine protein phosphatase OS=Homo sapiens OX=9606 GN=ACP1 PE=1 SV=3	ACP1	18.042	0.445	0.525	0.752	0.77	1.271	0.784	1.351	0.965	1.203	1.063	1.426	0.081961
Q9UKC9	F-box/LRR-repeat protein 2 OS=Homo sapiens OX=9606 GN=FBXL2 PE=1 SV=3	FBXL2	47.061	1.876	1.6	2.388			1.546	0.624	0.519			0.459	0.067783
Q9H4A4	Aminopeptidase B OS=Homo sapiens OX=9606 GN=RNPEP PE=1 SV=2	RNPEP	72.595	1.232	1.396	0.779	0.475	0.518	1.055	1.121	1.327	0.638	0.644	1.087	0.62702
Q04760	Lactoylglutathione lyase OS=Homo sapiens OX=9606 GN=GLO1 PE=1 SV=4	GLO1	20.777	1.651	2.013	1.065			0.696	1.163	0.861			0.575	0.086896
P29972	Aquaporin-1 OS=Homo sapiens OX=9606 GN=AQP1 PE=1 SV=3	AQP1	28.526	0.485	1.072	0.703	0.678		5.288	1.186	0.447	3.978		3.71	0.159696
Q8TE67	Epidermal growth factor receptor kinase substrate 8-like protein 3 OS=Homo sapiens OX=9606 GN=EPS8L3 PE=1 SV=2	EPS8L3	66.86				1.615	1.674				0.823	0.679	0.457	0.0150578
P00995	Serine protease inhibitor Kazal-type 1 OS=Homo sapiens OX=9606 GN=SPINK1 PE=1 SV=2	SPINK1	8.5067	0.632	0.563	1.05	0.963	0.449	1.904	1.54	0.852	1.384	0.462	1.68	0.165735
P21695	"Glycerol-3-phosphate dehydrogenase [NAD(+)], cytoplasmic OS=Homo sapiens OX=9606 GN=GPD1 PE=1 SV=4"	GPD1	37.567	1.351	0.949	0.675	0.876	0.798	0.504	1.156	0.756	0.647	1.697	1.024	0.85938
Q15418	Ribosomal protein S6 kinase alpha-1 OS=Homo sapiens OX=9606 GN=RPS6KA1 PE=1 SV=2	RPS6KA1	82.722	0.037	0.07	0.033			1.567	0.444	0.067			14.843	0.090436
P24071	Immunoglobulin alpha Fc receptor OS=Homo sapiens OX=9606 GN=FCAR PE=1 SV=1	FCAR	32.265				5.967	0.582				1.144	0.57	0.262	0.56232
A8K2U0	Alpha-2-macroglobulin-like protein 1 OS=Homo sapiens OX=9606 GN=A2ML1 PE=1 SV=3	A2ML1	161.1	0.706	1.052	0.549			1.718	0.97	2.298			2.161	0.077604
P02788	Lactotransferrin OS=Homo sapiens OX=9606 GN=LTF PE=1 SV=6	LTF	78.181	0.411	1.065	0.256	2.215	0.578	5.169	0.892	0.389	1.438	0.814	1.923	0.37396
O60636	Tetraspanin-2 OS=Homo sapiens OX=9606 GN=TSPAN2 PE=1 SV=2	TSPAN2	24.147	1.532	0.647	0.318	3.101	0.491	2.645	1.972	1.073	1.393	0.931	1.316	0.26476
Q9NZD2	Glycolipid transfer protein OS=Homo sapiens OX=9606 GN=GLTP PE=1 SV=3	GLTP	23.85	1.06	1.072	1.334			1.378	1.38	1.323			1.177	0.090685
P55786	Puromycin-sensitive aminopeptidase OS=Homo sapiens OX=9606 GN=NPEPPS PE=1 SV=2	NPEPPS	103.28	1.461	1.613	0.919			0.843	1.413	1.183			0.861	0.56756
P09382	Galectin-1 OS=Homo sapiens OX=9606 GN=LGALS1 PE=1 SV=2	LGALS1	14.716	3.443	3.168	1.146	0.713	0.489	1.196	0.312	0.128	0.745	0.783	0.353	0.10868
Q9BXI6	TBC1 domain family member 10A OS=Homo sapiens OX=9606 GN=TBC1D10A PE=1 SV=1	TBC1D10A	57.117	1.537	1.074	1.673	1.174	1.32	2.115	1.435	1.47	1.274	0.943	1.068	0.7772
P00390	"Glutathione reductase, mitochondrial OS=Homo sapiens OX=9606 GN=GSR PE=1 SV=2"	GSR	56.256	3.19	0.68	1.475	0.74	0.54	0.863	0.929	0.961	0.953	0.905	0.696	0.70766
P49189	4-trimethylaminobutyraldehyde dehydrogenase OS=Homo sapiens OX=9606 GN=ALDH9A1 PE=1 SV=3	ALDH9A1	53.801	1.358	2.319	0.736	0.989	0.993	1.091	1.09	1.29	1.113	1.561	0.961	0.88266
Q9NR46	Endophilin-B2 OS=Homo sapiens OX=9606 GN=SH3GLB2 PE=1 SV=1	SH3GLB2	43.973	1.574	0.868	1.382			1.079	0.918	1.561			0.93	0.79468
P42224	Signal transducer and activator of transcription 1-alpha/beta OS=Homo sapiens OX=9606 GN=STAT1 PE=1 SV=2	STAT1	87.334	0.465	4.946	1.116			0.329	0.448	0.433			0.185	0.21932
O60488	Long-chain-fatty-acid--CoA ligase 4 OS=Homo sapiens OX=9606 GN=ACSL4 PE=1 SV=2	ACSL4	79.187	0.799	1.658	0.774			2.187	1.229	0.956			1.353	0.42996
Q9H3G5	Probable serine carboxypeptidase CPVL OS=Homo sapiens OX=9606 GN=CPVL PE=1 SV=2	CPVL	54.163	0.409	1.644	0.666	0.906	1.054	0.444	1.066	1.251	1.816	1.776	1.358	0.41234
P27797	Calreticulin OS=Homo sapiens OX=9606 GN=CALR PE=1 SV=1	CALR	48.141	0.765	0.967	0.482	1.458	0.977	1.811	0.923	1.685	0.568	0.724	1.228	0.58806
Q9Y3C6	Peptidyl-prolyl cis-trans isomerase-like 1 OS=Homo sapiens OX=9606 GN=PPIL1 PE=1 SV=1	PPIL1	18.237	0.668	1.319	0.83			0.592	0.769	1.92			1.165	0.89154
O95782	AP-2 complex subunit alpha-1 OS=Homo sapiens OX=9606 GN=AP2A1 PE=1 SV=3	AP2A1	107.54				1.054	1.622				1.545	1.58	1.168	0.49602
Q6V0I7	Protocadherin Fat 4 OS=Homo sapiens OX=9606 GN=FAT4 PE=1 SV=2	FAT4	542.68	1.572	1.467	0.762	0.396	0.385	0.671	1.189	3.288	0.561	0.579	1.372	0.6223
Q3MIR4	Cell cycle control protein 50B OS=Homo sapiens OX=9606 GN=TMEM30B PE=1 SV=1	TMEM30B	38.941	0.84	1.573	1.391	1.802	2.125	1.1	0.912	1.793	0.82	1.501	0.792	0.31578
Q00536	Cyclin-dependent kinase 16 OS=Homo sapiens OX=9606 GN=CDK16 PE=1 SV=1	CDK16	55.715	1.108	1.3	1.045			1.481	1.043	1.926			1.289	0.29638
Q6P1N9	Putative deoxyribonuclease TATDN1 OS=Homo sapiens OX=9606 GN=TATDN1 PE=1 SV=2	TATDN1	33.601	0.871	1.779	1.105			0.948	1.206	0.885			0.809	0.48824
Q16881	"Thioredoxin reductase 1, cytoplasmic OS=Homo sapiens OX=9606 GN=TXNRD1 PE=1 SV=3"	TXNRD1	70.905	1.563	1.355	2.719			1.503	1.377	1.417			0.762	0.40342
Q9UHL4	Dipeptidyl peptidase 2 OS=Homo sapiens OX=9606 GN=DPP7 PE=1 SV=3	DPP7	54.341	2.227	3.977	2.697	1.335	0.813	0.939	1.258	1.752	1.113	0.983	0.547	0.141542
Q15942	Zyxin OS=Homo sapiens OX=9606 GN=ZYX PE=1 SV=1	ZYX	61.277				2.011	1.401				1.07	0.723	0.525	0.136256
P01040	Cystatin-A OS=Homo sapiens OX=9606 GN=CSTA PE=1 SV=1	CSTA	11.006	0.962	2.349	1.198			1.095	0.961	0.586			0.586	0.20854
Q7Z2W4	Zinc finger CCCH-type antiviral protein 1 OS=Homo sapiens OX=9606 GN=ZC3HAV1 PE=1 SV=3	ZC3HAV1	101.43	1.98	0.667	1.381	1.688	2.463	2.287	0.574	0.289	0.886	0.834	0.595	0.140884
P19652	Alpha-1-acid glycoprotein 2 OS=Homo sapiens OX=9606 GN=ORM2 PE=1 SV=2	ORM2	23.602	0.359	0.52	0.265	0.898	0.565	1.282	2.447	1.06	1.056	0.972	2.615	0.0062796
O75747	Phosphatidylinositol 4-phosphate 3-kinase C2 domain-containing subunit gamma OS=Homo sapiens OX=9606 GN=PIK3C2G PE=1 SV=3	PIK3C2G	165.71	0.808	0.984	1.038			0.557	0.805	0.619			0.7	0.052802
P14543	Nidogen-1 OS=Homo sapiens OX=9606 GN=NID1 PE=1 SV=3	NID1	136.38	0.652	1.41	0.636	0.602	0.39	1.354	1.537	1.223	0.669	0.523	1.438	0.24264
Q14789	Golgin subfamily B member 1 OS=Homo sapiens OX=9606 GN=GOLGB1 PE=1 SV=2	GOLGB1	376.01				2.441	6.105				0.104	0.276	0.044	0.042937
Q9NQ76	Matrix extracellular phosphoglycoprotein OS=Homo sapiens OX=9606 GN=MEPE PE=1 SV=1	MEPE	58.418				2.008	1.359				0.277	0.379	0.195	0.022818
Q15831	Serine/threonine-protein kinase STK11 OS=Homo sapiens OX=9606 GN=STK11 PE=1 SV=1	STK11	48.635	0.789	0.755	0.649	0.478	0.622	0.847	1.582	1.451	0.93	1.267	1.845	0.0041782
P51795	H(+)/Cl(-) exchange transporter 5 OS=Homo sapiens OX=9606 GN=CLCN5 PE=1 SV=1	CLCN5	83.146	0.561	0.518	0.271			0.996	0.886	0.61			1.846	0.079338
P69905	Hemoglobin subunit alpha OS=Homo sapiens OX=9606 GN=HBA1 PE=1 SV=2	HBA1	15.257	0.943	0.92	0.582			0.506	0.425	1.573			1.024	0.7763
Q9H0M0	NEDD4-like E3 ubiquitin-protein ligase WWP1 OS=Homo sapiens OX=9606 GN=WWP1 PE=1 SV=1	WWP1	105.2				1.041	1.726				0.647	0.73	0.498	0.123863
Q99720	Sigma non-opioid intracellular receptor 1 OS=Homo sapiens OX=9606 GN=SIGMAR1 PE=1 SV=1	SIGMAR1	25.127	1.586	17.366	1.065			0.87	1.088				0.147	0.38188
P07900	Heat shock protein HSP 90-alpha OS=Homo sapiens OX=9606 GN=HSP90AA1 PE=1 SV=5	HSP90AA1	84.659	1.988	5.105	1.402	0.846	1.385	0.847	1.213	1.277	0.696	1.151	0.483	0.124061
Q92747	Actin-related protein 2/3 complex subunit 1A OS=Homo sapiens OX=9606 GN=ARPC1A PE=2 SV=2	ARPC1A	41.569	1.043	1.118	1.547	1.315	1.846	0.663	0.912	1.958	0.972	0.966	0.796	0.21962
Q709C8	Vacuolar protein sorting-associated protein 13C OS=Homo sapiens OX=9606 GN=VPS13C PE=1 SV=1	VPS13C	422.39	1.071	1.216	0.9	1.16	1.297	1.44	1.136	0.971	1.004	0.918	0.969	0.7244
P04275	von Willebrand factor OS=Homo sapiens OX=9606 GN=VWF PE=1 SV=4	VWF	309.26	0.812	0.672	0.531	0.411	1.027	0.428	0.433	5.007	0.453	1.74	2.334	0.5305
O60664	Perilipin-3 OS=Homo sapiens OX=9606 GN=PLIN3 PE=1 SV=3	PLIN3	47.074	1.097	4.655	1.106			2.157	0.926	0.451			0.515	0.40622
P30679	Guanine nucleotide-binding protein subunit alpha-15 OS=Homo sapiens OX=9606 GN=GNA15 PE=1 SV=2	GNA15	43.568	1.062	1.267	2.057	1.131	3.858	2.63	0.736	0.955	0.768	0.835	0.632	0.20858
Q9P1A6	Disks large-associated protein 2 OS=Homo sapiens OX=9606 GN=DLGAP2 PE=1 SV=4	DLGAP2	117.62	1.265	2.014	0.938			1.71	0.486	0.517			0.643	0.28686
O15296	Arachidonate 15-lipoxygenase B OS=Homo sapiens OX=9606 GN=ALOX15B PE=1 SV=3	ALOX15B	75.856	1.271	5.96	1.417			1.08	0.953	0.71			0.317	0.155897
Q8WUN7	Ubiquitin domain-containing protein 2 OS=Homo sapiens OX=9606 GN=UBTD2 PE=1 SV=2	UBTD2	26.189	1.361	0.963	0.924	1.307	1.5	0.647	1.623	1.199	0.378	0.534	0.724	0.153982
O00186	Syntaxin-binding protein 3 OS=Homo sapiens OX=9606 GN=STXBP3 PE=1 SV=2	STXBP3	67.764	0.46	0.759	0.274	0.4	0.355	1.742	2.8	1.272	1.2	1.09	3.605	0.00072157
Q9Y6X5	Bis(5'-adenosyl)-triphosphatase ENPP4 OS=Homo sapiens OX=9606 GN=ENPP4 PE=1 SV=3	ENPP4	51.641	1.45	1.653	1.094			1.514	1.264	1.031			0.908	0.5958
Q9Y6Q5	AP-1 complex subunit mu-2 OS=Homo sapiens OX=9606 GN=AP1M2 PE=1 SV=4	AP1M2	48.108				0.793	0.952				0.853	1.125	1.134	0.54462
P30101	Protein disulfide-isomerase A3 OS=Homo sapiens OX=9606 GN=PDIA3 PE=1 SV=4	PDIA3	56.782	1.125	3.921	1.186	2.269	0.553	1.813	0.745	1.921	1.403	1.8	0.848	0.99926
P49221	Protein-glutamine gamma-glutamyltransferase 4 OS=Homo sapiens OX=9606 GN=TGM4 PE=1 SV=2	TGM4	77.144	9.265	1.664	0.937			3.234	0.529	0.664			0.373	0.39642
O15244	Solute carrier family 22 member 2 OS=Homo sapiens OX=9606 GN=SLC22A2 PE=1 SV=2	SLC22A2	62.58	2.045	1.045	0.818	0.588	0.368	0.563	1.273	0.71	0.484	0.747	0.777	0.67464
P06865	Beta-hexosaminidase subunit alpha OS=Homo sapiens OX=9606 GN=HEXA PE=1 SV=2	HEXA	60.702	0.809	1.839	0.795	0.758	0.763	0.752	0.758	0.835	1.632	1.382	1.08	0.7137
P28072	Proteasome subunit beta type-6 OS=Homo sapiens OX=9606 GN=PSMB6 PE=1 SV=4	PSMB6	25.357	1.074	1.604	1.52	1.255	0.821	1.082	1.093	1.305	1.605	0.618	0.909	0.58676
P05155	Plasma protease C1 inhibitor OS=Homo sapiens OX=9606 GN=SERPING1 PE=1 SV=2	SERPING1	55.154	0.722	0.955	0.411	0.791	0.685	0.416	0.747	2.753	0.751	0.636	1.488	0.5876
Q9UQB8	Brain-specific angiogenesis inhibitor 1-associated protein 2 OS=Homo sapiens OX=9606 GN=BAIAP2 PE=1 SV=1	BAIAP2	60.867	1.11	0.819	1.425	1.234	1.502	1.497	0.762	1.059	1.006	0.832	0.847	0.3086
P13639	Elongation factor 2 OS=Homo sapiens OX=9606 GN=EEF2 PE=1 SV=4	EEF2	95.337	1.035	3.7	1.136	1.037	1.597	0.88	1.735	1.144	0.983	0.978	0.673	0.31164
O75146	Huntingtin-interacting protein 1-related protein OS=Homo sapiens OX=9606 GN=HIP1R PE=1 SV=2	HIP1R	119.39				1.071	0.867				0.78	1.074	0.957	0.81344
Q99816	Tumor susceptibility gene 101 protein OS=Homo sapiens OX=9606 GN=TSG101 PE=1 SV=2	TSG101	43.944	0.911	1.095	1.123	0.563	0.587	0.843	1.267	1.063	0.964	0.968	1.193	0.23544
Q52LW3	Rho GTPase-activating protein 29 OS=Homo sapiens OX=9606 GN=ARHGAP29 PE=1 SV=2	ARHGAP29	142.06	0.631	0.647	0.597			0.66	0.777	0.797			1.191	0.053782
Q14108	Lysosome membrane protein 2 OS=Homo sapiens OX=9606 GN=SCARB2 PE=1 SV=2	SCARB2	54.29	0.736	0.75	0.959	0.707	0.723	0.651	1.216	0.783	1.445	1.646	1.482	0.143764
Q9BPY8	Homeodomain-only protein OS=Homo sapiens OX=9606 GN=HOPX PE=1 SV=1	HOPX	8.26	1.833	1.556	1.244	0.68	1.246	1.88	1.281	2.323	0.981	0.536	1.067	0.98908
Q9BYF1	Angiotensin-converting enzyme 2 OS=Homo sapiens OX=9606 GN=ACE2 PE=1 SV=2	ACE2	92.462	0.795	0.776	1.274	1.117	1.636	0.481	1.764	0.602	1.133	0.895	0.871	0.472
Q15847	Adipogenesis regulatory factor OS=Homo sapiens OX=9606 GN=ADIRF PE=1 SV=1	ADIRF	7.8547	1.867	1.227	1.715	1.55	2.724	1.86	0.495	0.342	1.801	0.521	0.553	0.065223
P61457	Pterin-4-alpha-carbinolamine dehydratase OS=Homo sapiens OX=9606 GN=PCBD1 PE=1 SV=2	PCBD1	11.999				0.921	0.805				1.157	1.233	1.385	0.048057
Q01082	"Spectrin beta chain, non-erythrocytic 1 OS=Homo sapiens OX=9606 GN=SPTBN1 PE=1 SV=2"	SPTBN1	274.61	1.112	1.433	0.838	1.437	0.907	1.158	0.958	1.324	0.911	1.007	0.936	0.70674
Q9Y6R7	IgGFc-binding protein OS=Homo sapiens OX=9606 GN=FCGBP PE=1 SV=3	FCGBP	572.01	0.384	0.455	1.33	5.68	1.931	1.265	0.203	0.939	0.887	0.834	0.422	0.39318
Q14515	SPARC-like protein 1 OS=Homo sapiens OX=9606 GN=SPARCL1 PE=1 SV=2	SPARCL1	75.207	1.508	1.811	1.198			0.975	0.552	2.831			0.965	0.63318
P47929	Galectin-7 OS=Homo sapiens OX=9606 GN=LGALS7 PE=1 SV=2	LGALS7	15.075	0.567	1.058	0.42			1.019	2.425	1.826			2.577	0.061458
P63218	Guanine nucleotide-binding protein G(I)/G(S)/G(O) subunit gamma-5 OS=Homo sapiens OX=9606 GN=GNG5 PE=1 SV=3	GNG5	7.3184				2.066	2.655				0.726	1.379	0.446	0.132245
Q9NZJ9	Diphosphoinositol polyphosphate phosphohydrolase 2 OS=Homo sapiens OX=9606 GN=NUDT4 PE=1 SV=2	NUDT4	20.306	0.833	0.846	1.574			0.696	0.672	0.789			0.663	0.163402
Q15382	GTP-binding protein Rheb OS=Homo sapiens OX=9606 GN=RHEB PE=1 SV=1	RHEB	20.497	1.231	1.073	1.24	0.94	1.35	1.033	1.506	1.154	0.927	1.023	0.967	0.71356
Q9NQE9	Histidine triad nucleotide-binding protein 3 OS=Homo sapiens OX=9606 GN=HINT3 PE=1 SV=1	HINT3	20.361	1.259	0.95	1.353	1.268	2.115	1.126	1.294	1.01	0.935	0.89	0.757	0.120465
P14621	Acylphosphatase-2 OS=Homo sapiens OX=9606 GN=ACYP2 PE=1 SV=2	ACYP2	11.139	1.86	5.255	2.377			2.468	2.619	1.564			0.701	0.47618
P28332	Alcohol dehydrogenase 6 OS=Homo sapiens OX=9606 GN=ADH6 PE=1 SV=3	ADH6	39.072	0.933	0.621	0.729	0.841	1.107	0.582	1.296	1.129	0.639	1.516	1.22	0.51336
P02751	Fibronectin OS=Homo sapiens OX=9606 GN=FN1 PE=1 SV=5	FN1	272.32	0.993	1.524	0.378	0.424	0.323	0.53	0.41	5.505	0.429	1.286	2.241	0.48228
P12821	Angiotensin-converting enzyme OS=Homo sapiens OX=9606 GN=ACE PE=1 SV=1	ACE	149.71	1.519	0.948	1.704	0.929	0.604	1.058	0.718	0.763	1.116	1.474	0.899	0.7565
Q13045	Protein flightless-1 homolog OS=Homo sapiens OX=9606 GN=FLII PE=1 SV=2	FLII	144.75	2.289	2.509	0.847			1.544	1.016	1.002			0.631	0.37272
Q13813	"Spectrin alpha chain, non-erythrocytic 1 OS=Homo sapiens OX=9606 GN=SPTAN1 PE=1 SV=3"	SPTAN1	284.54	1.229	1.252	1.464			1.443	0.956	1.687			1.036	0.95436
P22626	Heterogeneous nuclear ribonucleoproteins A2/B1 OS=Homo sapiens OX=9606 GN=HNRNPA2B1 PE=1 SV=2	HNRNPA2B1	37.429	0.677	1.426	0.59			1.972	0.765	1.308			1.502	0.34558
P78371	T-complex protein 1 subunit beta OS=Homo sapiens OX=9606 GN=CCT2 PE=1 SV=4	CCT2	57.488	1.711	1.495	0.746	0.862	0.754	0.903	1.035	1.773	0.898	1.129	1.031	0.78666
Q15365	Poly(rC)-binding protein 1 OS=Homo sapiens OX=9606 GN=PCBP1 PE=1 SV=2	PCBP1	37.497	1.355	1.345	0.927			1.266	1.821	1.149			1.168	0.4699
A2RTY3	Protein HEATR9 OS=Homo sapiens OX=9606 GN=HEATR9 PE=2 SV=2	HEATR9	65.68	1.132	0.767	0.876	0.621	0.6	0.436	1.037	0.842	0.635	1.638	1.148	0.79744
P01023	Alpha-2-macroglobulin OS=Homo sapiens OX=9606 GN=A2M PE=1 SV=3	A2M	163.29	0.672	0.552	0.31	0.512	0.413	0.714	0.316	4.438	0.331	3.32	3.708	0.25728
Q14203	Dynactin subunit 1 OS=Homo sapiens OX=9606 GN=DCTN1 PE=1 SV=3	DCTN1	141.69	1.226	1.029	0.756			1.35	1.1	1.429			1.288	0.175457
P51580	Thiopurine S-methyltransferase OS=Homo sapiens OX=9606 GN=TPMT PE=1 SV=1	TPMT	28.18	0.137	0.727	0.31	1.38	1.195	0.408	1.334	0.749	1.758	0.989	1.397	0.3253
A0A0C4DH25	Immunoglobulin kappa variable 3D-20 OS=Homo sapiens OX=9606 GN=IGKV3D-20 PE=3 SV=1	IGKV3D-20	12.515	0.556	0.888	0.399			6.993	1.251	2.134			5.631	0.05332
P60033	CD81 antigen OS=Homo sapiens OX=9606 GN=CD81 PE=1 SV=1	CD81	25.809	0.721	2.405	0.526			0.779	1.738	1.293			1.043	0.69694
Q13492	Phosphatidylinositol-binding clathrin assembly protein OS=Homo sapiens OX=9606 GN=PICALM PE=1 SV=2	PICALM	70.754	1.125	0.937	0.719			1.079	0.65	2.777			1.62	0.51852
P30273	High affinity immunoglobulin epsilon receptor subunit gamma OS=Homo sapiens OX=9606 GN=FCER1G PE=1 SV=1	FCER1G	9.6674	0.61	0.878	0.39	4.098	0.655	4.787	0.475	0.516	1.762	0.812	1.26	0.72054
O60494	Cubilin OS=Homo sapiens OX=9606 GN=CUBN PE=1 SV=5	CUBN	398.73	0.758	0.773	0.495	0.727	0.449	0.737	1.856	1.084	1.802	0.557	1.885	0.071544
Q9NQA5	Transient receptor potential cation channel subfamily V member 5 OS=Homo sapiens OX=9606 GN=TRPV5 PE=1 SV=2	TRPV5	82.55	1.308	0.93	0.76	0.823	0.955	0.664	1.92	0.838	1.396	0.871	1.191	0.60148
Q16543	Hsp90 co-chaperone Cdc37 OS=Homo sapiens OX=9606 GN=CDC37 PE=1 SV=1	CDC37	44.468	0.657	1.727	0.812	1.255	1.821	0.81	0.989	1	0.565	0.629	0.637	0.124558
P62258	14-3-3 protein epsilon OS=Homo sapiens OX=9606 GN=YWHAE PE=1 SV=1	YWHAE	29.174	0.989	1.147	0.685	0.758	0.891	1.112	1.584	0.921	1.121	1.15	1.317	0.061044
P51798	H(+)/Cl(-) exchange transporter 7 OS=Homo sapiens OX=9606 GN=CLCN7 PE=1 SV=2	CLCN7	88.678	0.861	1.481	1.552	1.391	1.827	0.913	0.739	0.995	0.082	0.495	0.453	0.094499
Q9HCY8	Protein S100-A14 OS=Homo sapiens OX=9606 GN=S100A14 PE=1 SV=1	S100A14	11.662				0.796	1.467				1.148	0.624	0.783	0.62844
Q495M3	Proton-coupled amino acid transporter 2 OS=Homo sapiens OX=9606 GN=SLC36A2 PE=1 SV=1	SLC36A2	53.216	0.91	0.998	0.707	0.696	0.721	0.342	1.675	0.868	0.57	0.994	1.103	0.92764
P16930	Fumarylacetoacetase OS=Homo sapiens OX=9606 GN=FAH PE=1 SV=2	FAH	46.374	1.677	0.908	0.893	0.724	0.44	1.024	1.778	0.632	1.017	1.309	1.241	0.38426
P28070	Proteasome subunit beta type-4 OS=Homo sapiens OX=9606 GN=PSMB4 PE=1 SV=4	PSMB4	29.204	0.87	0.548	0.689	1.23	0.655	1.838	0.868	2.719	1.148	1.306	1.974	0.029299
Q8WVE6	Transmembrane protein 171 OS=Homo sapiens OX=9606 GN=TMEM171 PE=1 SV=3	TMEM171	34.759				0.827	0.34				0.987	1.269	1.933	0.24722
Q86UD1	Out at first protein homolog OS=Homo sapiens OX=9606 GN=OAF PE=2 SV=1	OAF	30.688	0.473	0.732	0.224	0.697	0.442	0.208	1.391	1.684	2.041	0.908	2.427	0.154422
P06280	Alpha-galactosidase A OS=Homo sapiens OX=9606 GN=GLA PE=1 SV=1	GLA	48.766	0.644	0.831	0.45			0.434	1.319	2.302			2.106	0.33858
P14780	Matrix metalloproteinase-9 OS=Homo sapiens OX=9606 GN=MMP9 PE=1 SV=3	MMP9	78.457	0.498	0.512	0.394	2.864	0.345	4.9	0.49	0.632	1.893	0.559	1.837	0.37162
P11279	Lysosome-associated membrane glycoprotein 1 OS=Homo sapiens OX=9606 GN=LAMP1 PE=1 SV=3	LAMP1	44.882	1.215	0.581	1.311	0.969	1.368	0.852	1.41	0.732	1.128	1.896	1.105	0.72286
P20337	Ras-related protein Rab-3B OS=Homo sapiens OX=9606 GN=RAB3B PE=1 SV=2	RAB3B	24.758	1.527	15.021	0.552	1.1	0.512	0.962	0.923	0.916	2.042	0.617	0.292	0.57984
Q07864	DNA polymerase epsilon catalytic subunit A OS=Homo sapiens OX=9606 GN=POLE PE=1 SV=5	POLE	261.51	0.444	0.198	0.203			1.454	0.142	0.556			2.547	0.4404
P22234	Multifunctional protein ADE2 OS=Homo sapiens OX=9606 GN=PAICS PE=1 SV=3	PAICS	47.079	1.323	1.979	1.267			0.907	1.121	0.829			0.625	0.052905
P05060	Secretogranin-1 OS=Homo sapiens OX=9606 GN=CHGB PE=1 SV=2	CHGB	78.275	1.011	1.548	1.11	0.956	0.595	2.138	1.254	0.526	0.734	0.565	0.999	0.74098
P43353	Aldehyde dehydrogenase family 3 member B1 OS=Homo sapiens OX=9606 GN=ALDH3B1 PE=1 SV=1	ALDH3B1	51.839	1.224	0.645	1.732	1.053	1.257	1.581	1.523	0.902	1.096	1.025	1.037	0.76808
Q01518	Adenylyl cyclase-associated protein 1 OS=Homo sapiens OX=9606 GN=CAP1 PE=1 SV=5	CAP1	51.901	1.393	0.936	0.966	1.892	1.717	2.261	0.744	0.72	0.442	0.838	0.725	0.183845
P09497	Clathrin light chain B OS=Homo sapiens OX=9606 GN=CLTB PE=1 SV=1	CLTB	25.19	0.766	0.455	0.66	0.958	1.001	1.112	0.604	1.884	0.928	1.928	1.681	0.113997
Q03169	Tumor necrosis factor alpha-induced protein 2 OS=Homo sapiens OX=9606 GN=TNFAIP2 PE=2 SV=2	TNFAIP2	72.66	0.804	0.744	1.466	1.229	3.396	3.388	0.704	0.81	0.634	0.587	0.802	0.46552
P03973	Antileukoproteinase OS=Homo sapiens OX=9606 GN=SLPI PE=1 SV=2	SLPI	14.326	1.078	4.268	0.718	1.287	0.723	8.417	0.671	0.677	3.409	1.372	1.802	0.56614
Q96CS7	Pleckstrin homology domain-containing family B member 2 OS=Homo sapiens OX=9606 GN=PLEKHB2 PE=1 SV=1	PLEKHB2	24.736				0.467	0.592				1.062	1.372	2.298	0.041384
Q9UKG1	DCC-interacting protein 13-alpha OS=Homo sapiens OX=9606 GN=APPL1 PE=1 SV=1	APPL1	79.663	1.412	1.256	0.625	1.058	0.538	1.001	1.614	1.314	1.426	0.583	1.215	0.45812
Q32P28	Prolyl 3-hydroxylase 1 OS=Homo sapiens OX=9606 GN=P3H1 PE=1 SV=2	P3H1	83.393				1.494	3.78				1.061	0.502	0.296	0.186222
P40225	Thrombopoietin OS=Homo sapiens OX=9606 GN=THPO PE=1 SV=1	THPO	37.822				0.603	0.802				1.839	3.342	3.688	0.061598
P48147	Prolyl endopeptidase OS=Homo sapiens OX=9606 GN=PREP PE=1 SV=2	PREP	80.699	1.378	1.911	1.737	1.176	1.785	0.732	0.914	0.892	0.99	1.146	0.585	0.00189545
P32754	4-hydroxyphenylpyruvate dioxygenase OS=Homo sapiens OX=9606 GN=HPD PE=1 SV=2	HPD	44.934	0.905	1.106	0.917	1.158	0.607	0.854	1.161	0.655	0.751	1.671	1.085	0.82362
Q06830	Peroxiredoxin-1 OS=Homo sapiens OX=9606 GN=PRDX1 PE=1 SV=1	PRDX1	22.11	1.196	0.568	0.699	0.682	0.854	1.164	1.333	1.021	0.87	1.336	1.431	0.036322
P84095	Rho-related GTP-binding protein RhoG OS=Homo sapiens OX=9606 GN=RHOG PE=1 SV=1	RHOG	21.308	0.931	0.877	0.936	1.1	1.189	2.458	1.066	1.365	0.92	0.959	1.345	0.2923
Q8NFH8	RalBP1-associated Eps domain-containing protein 2 OS=Homo sapiens OX=9606 GN=REPS2 PE=1 SV=2	REPS2	71.533				1.115	3.553				1.446		0.62
O75891	Cytosolic 10-formyltetrahydrofolate dehydrogenase OS=Homo sapiens OX=9606 GN=ALDH1L1 PE=1 SV=2	ALDH1L1	98.828	0.997	0.704	1.022	0.838	0.878	0.602	0.827	1.011	0.653	1.139	0.953	0.63572
Q9NZP8	Complement C1r subcomponent-like protein OS=Homo sapiens OX=9606 GN=C1RL PE=1 SV=2	C1RL	53.498	0.869	0.879	0.634			0.83	1.166	0.777			1.164	0.42466
Q9P0V3	SH3 domain-binding protein 4 OS=Homo sapiens OX=9606 GN=SH3BP4 PE=1 SV=1	SH3BP4	107.49	1.483	0.955	1.682	0.969	1.811	1.12	1.133	1.223	0.95	0.824	0.761	0.146978
P02042	Hemoglobin subunit delta OS=Homo sapiens OX=9606 GN=HBD PE=1 SV=2	HBD	16.055	0.941	0.869	0.693	0.705	0.983	0.659	0.793	1.148	0.78	2.053	1.296	0.43108
Q14764	Major vault protein OS=Homo sapiens OX=9606 GN=MVP PE=1 SV=4	MVP	99.326	0.876	0.838	0.489	1.166	0.785	0.717	0.558	1.523	1.341	2.42	1.579	0.2654
Q6IAA8	Ragulator complex protein LAMTOR1 OS=Homo sapiens OX=9606 GN=LAMTOR1 PE=1 SV=2	LAMTOR1	17.745	1.123	0.853	0.586	0.66	0.665	1.181	1.039	0.886	0.85	1.663	1.446	0.060642
Q7L576	Cytoplasmic FMR1-interacting protein 1 OS=Homo sapiens OX=9606 GN=CYFIP1 PE=1 SV=1	CYFIP1	145.18	0.791	0.725	2.283	1.971	6.218	0.91	0.374	0.42	1.087	0.67	0.289	0.053639
P29353	SHC-transforming protein 1 OS=Homo sapiens OX=9606 GN=SHC1 PE=1 SV=4	SHC1	62.821	1.288	1.299	0.892	1.418	1.319	1.454	0.837	0.846	1.262	0.8	0.836	0.21806
P29401	Transketolase OS=Homo sapiens OX=9606 GN=TKT PE=1 SV=3	TKT	67.877	0.905	1.168	1.184	1.293	1.075	1.068	1.06	2.507	1.654	1.153	1.323	0.2361
P11215	Integrin alpha-M OS=Homo sapiens OX=9606 GN=ITGAM PE=1 SV=2	ITGAM	127.18	0.358	0.57	0.296	6.638	0.455	4.152	0.346	0.433	1.497	1.245	0.923	0.62412
P63098	Calcineurin subunit B type 1 OS=Homo sapiens OX=9606 GN=PPP3R1 PE=1 SV=2	PPP3R1	19.3	0.725	5.124	0.952			1.631	1.447	0.926			0.589	0.81306
O15066	Kinesin-like protein KIF3B OS=Homo sapiens OX=9606 GN=KIF3B PE=1 SV=1	KIF3B	85.124	1.599	1.254	0.763	0.585	0.767	0.726	1.123	0.936	0.829	0.759	0.88	0.72972
Q5T2W1	Na(+)/H(+) exchange regulatory cofactor NHE-RF3 OS=Homo sapiens OX=9606 GN=PDZK1 PE=1 SV=2	PDZK1	57.129	1.13	1.266	3.306	0.94	1.163	0.652	1.443	0.656	0.847	0.972	0.586	0.119684
Q5TZA2	Rootletin OS=Homo sapiens OX=9606 GN=CROCC PE=1 SV=1	CROCC	228.52	0.374	0.635	3.115	1.214	7.147	2.195	0.555	0.341	1.588	0.567	0.42	0.39894
Q93088	Betaine--homocysteine S-methyltransferase 1 OS=Homo sapiens OX=9606 GN=BHMT PE=1 SV=2	BHMT	44.998	1.655	1.149	1.135	0.992	0.716	0.792	0.851	1.123	1.024	1.485	0.934	0.75138
Q16651	Prostasin OS=Homo sapiens OX=9606 GN=PRSS8 PE=1 SV=1	PRSS8	36.431	1.995	1.118	1.839	1.916	2.971	1.715	0.481	0.928	1.444	0.655	0.531	0.04
Q9Y6D6	Brefeldin A-inhibited guanine nucleotide-exchange protein 1 OS=Homo sapiens OX=9606 GN=ARFGEF1 PE=1 SV=2	ARFGEF1	208.76	1.426	5.675	1.575	4.804	1.932	1.829	0.759	0.438	0.587	0.478	0.265	0.0097619
P61626	Lysozyme C OS=Homo sapiens OX=9606 GN=LYZ PE=1 SV=1	LYZ	16.537	0.801	0.69	0.515	5.225	0.451	6.376	0.347	0.461	0.183	0.101	0.972	0.41964
Q8IUC4	Rhophilin-2 OS=Homo sapiens OX=9606 GN=RHPN2 PE=1 SV=1	RHPN2	76.992	1.61	1.308	1.864	1.509	2.716	1.264	0.751	1.091	0.735	0.688	0.503	0.0043247
O95967	EGF-containing fibulin-like extracellular matrix protein 2 OS=Homo sapiens OX=9606 GN=EFEMP2 PE=1 SV=3	EFEMP2	49.405	0.524	0.948				1.312	2.052	1.214			2.073	0.092804
Q8NFZ8	Cell adhesion molecule 4 OS=Homo sapiens OX=9606 GN=CADM4 PE=1 SV=1	CADM4	42.785	0.811	1.176	1.006	0.781	0.752	0.918	1.142	0.641	1.032	0.753	0.991	0.91324
Q86WR7	Proline and serine-rich protein 2 OS=Homo sapiens OX=9606 GN=PROSER2 PE=1 SV=2	PROSER2	45.801	1.231	0.956	2.946	4.532	3.493	1.789	0.644	1.363	0.977	0.926	0.433	0.070784
O95630	STAM-binding protein OS=Homo sapiens OX=9606 GN=STAMBP PE=1 SV=1	STAMBP	48.076	1.435	0.596	1.01	0.291	0.452	0.911	1.084	1.16	0.928	1.477	1.469	0.151437
O43934	UNC93-like protein MFSD11 OS=Homo sapiens OX=9606 GN=MFSD11 PE=2 SV=2	MFSD11	49.201				0.48	0.69				0.839	1.601	2.085	0.199455
O00151	PDZ and LIM domain protein 1 OS=Homo sapiens OX=9606 GN=PDLIM1 PE=1 SV=4	PDLIM1	36.071	0.643	0.993	0.651			1.747	0.589	1.13			1.516	0.37866
Q9UHA4	Ragulator complex protein LAMTOR3 OS=Homo sapiens OX=9606 GN=LAMTOR3 PE=1 SV=1	LAMTOR3	13.623	1.085	0.829	1.014			0.386	0.533	0.4			0.45	0.0035369
P30040	Endoplasmic reticulum resident protein 29 OS=Homo sapiens OX=9606 GN=ERP29 PE=1 SV=4	ERP29	28.993	0.523	0.588	0.467	1.242	0.596	3.267	0.583	0.949	0.971	1.6	2.157	0.08936
Q6N022	Teneurin-4 OS=Homo sapiens OX=9606 GN=TENM4 PE=1 SV=2	TENM4	307.95				0.514	0.586				0.748	3.74	4.08	0.30156
P49407	Beta-arrestin-1 OS=Homo sapiens OX=9606 GN=ARRB1 PE=1 SV=2	ARRB1	47.065	1.328	1.131	1.405	1.681	3.007	1.576	1.308	1.071	1.269	0.587	0.679	0.157077
Q15126	Phosphomevalonate kinase OS=Homo sapiens OX=9606 GN=PMVK PE=1 SV=3	PMVK	21.995	0.645	1.228	0.759	0.518	0.625	0.761	1.406	1.435	0.869	1.085	1.472	0.071723
P11168	"Solute carrier family 2, facilitated glucose transporter member 2 OS=Homo sapiens OX=9606 GN=SLC2A2 PE=1 SV=1"	SLC2A2	57.489	1.189	1.356	0.811			0.791	0.956	0.395			0.638	0.187301
Q14142	Tripartite motif-containing protein 14 OS=Homo sapiens OX=9606 GN=TRIM14 PE=1 SV=2	TRIM14	49.772	0.84	0.885	0.982	1.152	2.188	0.874	1.104	0.749	0.922	1.876	0.914	0.75098
Q96SN8	CDK5 regulatory subunit-associated protein 2 OS=Homo sapiens OX=9606 GN=CDK5RAP2 PE=1 SV=5	CDK5RAP2	215.04	2.315	0.793	0.363			1.126	2.39	0.878			1.266	0.5308
O14713	Integrin beta-1-binding protein 1 OS=Homo sapiens OX=9606 GN=ITGB1BP1 PE=1 SV=1	ITGB1BP1	21.782	0.583	1.201	1.429	1.22	1.712	0.809	0.7	1.566	0.78	0.793	0.756	0.2847
P09758	Tumor-associated calcium signal transducer 2 OS=Homo sapiens OX=9606 GN=TACSTD2 PE=1 SV=3	TACSTD2	35.709	1.193	1.062	1.034	1.568	0.646	1.318	0.941	3.171	0.661	1.099	1.307	0.62154
P15169	Carboxypeptidase N catalytic chain OS=Homo sapiens OX=9606 GN=CPN1 PE=1 SV=1	CPN1	52.286	1.001	2.491	0.79			0.873	0.577	5.556			1.636	0.88786
Q12789	General transcription factor 3C polypeptide 1 OS=Homo sapiens OX=9606 GN=GTF3C1 PE=1 SV=4	GTF3C1	238.87	6.091	5.002	1.151			1.059	0.317	0.263			0.134	0.043263
Q6UW56	All-trans retinoic acid-induced differentiation factor OS=Homo sapiens OX=9606 GN=ATRAID PE=1 SV=2	ATRAID	24.746	0.624	0.601	0.817			0.851	1.182	0.634			1.306	0.29764
P15428	15-hydroxyprostaglandin dehydrogenase [NAD(+)] OS=Homo sapiens OX=9606 GN=HPGD PE=1 SV=1	HPGD	28.977	0.507	0.778	1.534	1.285	6.358	1.154	0.58	1.326	1.401	0.606	0.484	0.44698
O43854	EGF-like repeat and discoidin I-like domain-containing protein 3 OS=Homo sapiens OX=9606 GN=EDIL3 PE=1 SV=1	EDIL3	53.764	0.667	0.782	0.537			0.854	0.501	1.139			1.256	0.52308
O00308	NEDD4-like E3 ubiquitin-protein ligase WWP2 OS=Homo sapiens OX=9606 GN=WWP2 PE=1 SV=2	WWP2	98.911				1.829	2.002				0.881	0.849	0.452	0.0037596
Q86VN1	Vacuolar protein-sorting-associated protein 36 OS=Homo sapiens OX=9606 GN=VPS36 PE=1 SV=1	VPS36	43.816	0.946	0.753	0.981	0.75	0.63	0.943	1.077	1.046	1.178	0.947	1.279	0.024085
Q8WTX9	Probable palmitoyltransferase ZDHHC1 OS=Homo sapiens OX=9606 GN=ZDHHC1 PE=2 SV=1	ZDHHC1	54.818	1.657	1.412	0.731	0.607	0.733	0.678	0.834	0.818	0.567	1.022	0.762	0.37864
Q86V21	Acetoacetyl-CoA synthetase OS=Homo sapiens OX=9606 GN=AACS PE=1 SV=1	AACS	75.143	1.889	6.145	2.943			0.946	0.653	0.709			0.21	0.0159589
Q53TN4	Cytochrome b reductase 1 OS=Homo sapiens OX=9606 GN=CYBRD1 PE=1 SV=1	CYBRD1	31.641	2.398	1.661	1.339	1.078	0.926	0.995	1.027	2.403	1.352	1.326	0.96	0.87296
P0DOX7	Immunoglobulin kappa light chain OS=Homo sapiens OX=9606 PE=1 SV=1	---	23.379	0.763	2.274	0.876	1.142	1.266	3.611	0.623	1.463	0.926	0.956	1.199	0.87744
P63151	Serine/threonine-protein phosphatase 2A 55 kDa regulatory subunit B alpha isoform OS=Homo sapiens OX=9606 GN=PPP2R2A PE=1 SV=1	PPP2R2A	51.691	0.63	0.714	0.882	0.725	1.189	0.671	1.203	2.059	0.705	1.167	1.402	0.26862
P46108	Adapter molecule crk OS=Homo sapiens OX=9606 GN=CRK PE=1 SV=2	CRK	33.83	0.95	0.924	1.236	0.999	1.4	1.518	1.14	1.18	1.142	0.96	1.078	0.49822
Q5XUX1	F-box/WD repeat-containing protein 9 OS=Homo sapiens OX=9606 GN=FBXW9 PE=1 SV=2	FBXW9	54.115				0.469	0.872				0.657	3.563	3.147	0.43484
P05937	Calbindin OS=Homo sapiens OX=9606 GN=CALB1 PE=1 SV=2	CALB1	30.025	1.859	0.856	1.383	0.639	0.411	1.323	0.834	1.688	0.993	1.008	1.136	0.45166
P07476	Involucrin OS=Homo sapiens OX=9606 GN=IVL PE=1 SV=2	IVL	68.478	0.704	0.993	1.009			1.982	0.474	1.013			1.282	0.82764
O95998	Interleukin-18-binding protein OS=Homo sapiens OX=9606 GN=IL18BP PE=1 SV=2	IL18BP	21.099	0.813	0.716	0.626	0.414	0.403	2.03	0.548	0.242	0.217	0.416	1.162	0.67802
Q16719	Kynureninase OS=Homo sapiens OX=9606 GN=KYNU PE=1 SV=1	KYNU	52.351	0.668	0.789	0.653	0.473	1.053	1.191	1.339	2.214	0.933	1.323	1.925	0.0098354
Q7KZF4	Staphylococcal nuclease domain-containing protein 1 OS=Homo sapiens OX=9606 GN=SND1 PE=1 SV=1	SND1	102	0.88	0.96	1.123			0.691	1.042	0.975			0.914	0.52934
Q92963	GTP-binding protein Rit1 OS=Homo sapiens OX=9606 GN=RIT1 PE=1 SV=1	RIT1	25.145	0.845	1.026	1.091	0.597	1.667	0.759	1.437	0.947	1.078	1.774	1.147	0.52904
P06312	Immunoglobulin kappa variable 4-1 OS=Homo sapiens OX=9606 GN=IGKV4-1 PE=1 SV=1	IGKV4-1	13.38	0.574	1.07	0.639	0.416	0.782	1.776	0.558	5.817	0.741	0.306	2.642	0.43432
P49840	Glycogen synthase kinase-3 alpha OS=Homo sapiens OX=9606 GN=GSK3A PE=1 SV=2	GSK3A	50.98	2.177	2.148	3.254			0.86	1.155	0.89			0.383	0.0045419
O60658	"High affinity cAMP-specific and IBMX-insensitive 3',5'-cyclic phosphodiesterase 8A OS=Homo sapiens OX=9606 GN=PDE8A PE=1 SV=2"	PDE8A	93.303	1.108	1.454	0.935	0.748	0.908	0.761	1.393	0.991	0.94	1.004	0.988	0.96716
Q13018	Secretory phospholipase A2 receptor OS=Homo sapiens OX=9606 GN=PLA2R1 PE=1 SV=2	PLA2R1	168.6	0.936	1.283	0.669	0.626	0.881	0.474	2.3	1.47	1.621	0.894	1.538	0.30578
O15523	ATP-dependent RNA helicase DDX3Y OS=Homo sapiens OX=9606 GN=DDX3Y PE=1 SV=2	DDX3Y	73.153	2.88	3.584	2.112			2.813	0.166	1.279			0.497	0.23436
Q9H269	Vacuolar protein sorting-associated protein 16 homolog OS=Homo sapiens OX=9606 GN=VPS16 PE=1 SV=2	VPS16	94.693	0.879	1.313	2.255			1.182	1.356	0.778			0.746	0.48618
P43034	Platelet-activating factor acetylhydrolase IB subunit alpha OS=Homo sapiens OX=9606 GN=PAFAH1B1 PE=1 SV=2	PAFAH1B1	46.637	1.197	2.967	0.708	0.926	1.142	0.602	1.151	1.509	1.655	1.199	0.881	0.8725
Q9H6S3	Epidermal growth factor receptor kinase substrate 8-like protein 2 OS=Homo sapiens OX=9606 GN=EPS8L2 PE=1 SV=2	EPS8L2	80.62	1.007	0.878	1.407	1.628	2.486	1.018	0.875	1.532	0.657	0.675	0.642	0.116357
Q13183	Solute carrier family 13 member 2 OS=Homo sapiens OX=9606 GN=SLC13A2 PE=2 SV=1	SLC13A2	64.409	1.022	1.261	0.754	0.469	0.539	1.316	1.811	0.634	0.28	1.13	1.278	0.73368
Q9NY33	Dipeptidyl peptidase 3 OS=Homo sapiens OX=9606 GN=DPP3 PE=1 SV=2	DPP3	82.588				0.975	0.963				0.833	1.213	1.056	0.87728
Q92696	Geranylgeranyl transferase type-2 subunit alpha OS=Homo sapiens OX=9606 GN=RABGGTA PE=1 SV=2	RABGGTA	65.071	1.25	2.164	0.659			1.406	1.428	1.395			1.038	0.70396
P04155	Trefoil factor 1 OS=Homo sapiens OX=9606 GN=TFF1 PE=1 SV=1	TFF1	9.1494	0.886	1.029	0.713			1.653	3.235	0.874			2.193	0.169236
P15328	Folate receptor alpha OS=Homo sapiens OX=9606 GN=FOLR1 PE=1 SV=3	FOLR1	29.819	0.969	0.583	1.455	2.942	0.745	1.16	0.341	0.439	1.235	1.551	0.706	0.44052
Q9UL25	Ras-related protein Rab-21 OS=Homo sapiens OX=9606 GN=RAB21 PE=1 SV=3	RAB21	24.347	0.992	0.751	1.4	1.014	0.79	0.682	1.424	0.991	1.458	1.138	1.151	0.48662
P07947	Tyrosine-protein kinase Yes OS=Homo sapiens OX=9606 GN=YES1 PE=1 SV=3	YES1	60.801				1	1.207				1.15	0.802	0.884	0.5762
Q9HCE6	Rho guanine nucleotide exchange factor 10-like protein OS=Homo sapiens OX=9606 GN=ARHGEF10L PE=1 SV=4	ARHGEF10L	140.38	2.262	1.62	1.786	0.772	0.819	1.486	1.415	1.257	0.753	1.481	0.881	0.79452
A1A5D9	BICD family-like cargo adapter 2 OS=Homo sapiens OX=9606 GN=BICDL2 PE=1 SV=2	BICDL2	56.833	1.889	3.766	1.381			1.283	1.036	0.864			0.452	0.087365
Q9Y262	Eukaryotic translation initiation factor 3 subunit L OS=Homo sapiens OX=9606 GN=EIF3L PE=1 SV=1	EIF3L	66.726	0.75	0.845	0.851			0.555	1.101	2.13			1.548	0.53042
P09769	Tyrosine-protein kinase Fgr OS=Homo sapiens OX=9606 GN=FGR PE=1 SV=2	FGR	59.478				3.515	1.209				1.474	1.375	0.603	0.56034
Q9NV96	Cell cycle control protein 50A OS=Homo sapiens OX=9606 GN=TMEM30A PE=1 SV=1	TMEM30A	40.683	0.853	2.972	1.086	0.811	0.77	2.37	1.801	1.319	1.423	0.924	1.207	0.3549
P62987	Ubiquitin-60S ribosomal protein L40 OS=Homo sapiens OX=9606 GN=UBA52 PE=1 SV=2	UBA52	14.728	2.487	1.795	2.086	1.136	1.05	1.093	0.863	0.779	1.015	1.171	0.575	0.025179
Q96A65	Exocyst complex component 4 OS=Homo sapiens OX=9606 GN=EXOC4 PE=1 SV=1	EXOC4	110.5	1.432	1.681	1.55	1.491	1.109	1.032	1.881	1.323	0.705	0.635	0.768	0.15222
Q9H4G4	Golgi-associated plant pathogenesis-related protein 1 OS=Homo sapiens OX=9606 GN=GLIPR2 PE=1 SV=3	GLIPR2	17.218	0.841	1.156	0.742			2.418	0.933	0.587			1.438	0.66728
Q15181	Inorganic pyrophosphatase OS=Homo sapiens OX=9606 GN=PPA1 PE=1 SV=2	PPA1	32.66	1.138	2.811	0.907			1.358	1.269	0.924			0.731	0.61316
P08138	Tumor necrosis factor receptor superfamily member 16 OS=Homo sapiens OX=9606 GN=NGFR PE=1 SV=1	NGFR	45.183	0.398	0.489	0.676			0.739	1.335	1.154			2.065	0.037819
O43633	Charged multivesicular body protein 2a OS=Homo sapiens OX=9606 GN=CHMP2A PE=1 SV=1	CHMP2A	25.104	1.404	0.601	1.678	0.902	1.346	0.967	0.821	0.976	0.99	1.048	0.81	0.46676
Q9Y5Z0	Beta-secretase 2 OS=Homo sapiens OX=9606 GN=BACE2 PE=1 SV=1	BACE2	56.18	0.929	0.921	0.759			0.464	1.463	0.244			0.832	0.4793
P05186	"Alkaline phosphatase, tissue-nonspecific isozyme OS=Homo sapiens OX=9606 GN=ALPL PE=1 SV=4"	ALPL	57.304	1.935	1.537	0.777	1.137	0.998	0.997	0.715	0.514	1.083	1.55	0.761	0.27434
Q9NP85	Podocin OS=Homo sapiens OX=9606 GN=NPHS2 PE=1 SV=1	NPHS2	42.2	1.107	0.851	0.99	2.665	3.979	1.398	0.758	0.434	0.544	0.526	0.382	0.04662
P35611	Alpha-adducin OS=Homo sapiens OX=9606 GN=ADD1 PE=1 SV=2	ADD1	80.954	0.931	1.048	0.669			1.259	0.812	0.765			1.071	0.78512
Q9UGB7	Inositol oxygenase OS=Homo sapiens OX=9606 GN=MIOX PE=1 SV=1	MIOX	33.009	1.348	1.501	0.86	1.093	0.886	0.753	1.524	0.666	1.155	1.264	0.943	0.67978
P22891	Vitamin K-dependent protein Z OS=Homo sapiens OX=9606 GN=PROZ PE=1 SV=2	PROZ	44.743	0.558	0.911	0.561	0.512	0.33	0.308	1.555	3.776	1.099	0.89	2.656	0.138025
P13693	Translationally-controlled tumor protein OS=Homo sapiens OX=9606 GN=TPT1 PE=1 SV=1	TPT1	19.595				2.74	3.634				0.111	0.128	0.037	0.0023211
O95294	RasGAP-activating-like protein 1 OS=Homo sapiens OX=9606 GN=RASAL1 PE=1 SV=3	RASAL1	90.015	1.12	1.189	0.844			0.736	0.956	1.071			0.876	0.4338
P35080	Profilin-2 OS=Homo sapiens OX=9606 GN=PFN2 PE=1 SV=3	PFN2	15.046	0.834	2.03	0.83	0.94	1.533	1.682	0.751	0.441	1.246	0.846	0.805	0.4202
Q8WWX8	Sodium/myo-inositol cotransporter 2 OS=Homo sapiens OX=9606 GN=SLC5A11 PE=1 SV=1	SLC5A11	74.035	0.676	0.533	0.966	0.912	0.46	0.49	1.15	0.46	0.968	1.351	1.246	0.54358
Q15121	Astrocytic phosphoprotein PEA-15 OS=Homo sapiens OX=9606 GN=PEA15 PE=1 SV=2	PEA15	15.04	2.935	1.152	3.557			0.321	0.216	0.084			0.081	0.0085615
Q15843	NEDD8 OS=Homo sapiens OX=9606 GN=NEDD8 PE=1 SV=1	NEDD8	9.0714	1.82	2.289	1.8			1.546	0.579	0.782			0.492	0.058378
Q5VTJ3	Kelch domain-containing protein 7A OS=Homo sapiens OX=9606 GN=KLHDC7A PE=1 SV=5	KLHDC7A	84.478	0.652	0.476	0.168	0.328	0.377	0.723	0.183	6.103	0.346	2.736	5.043	0.20124
O95274	Ly6/PLAUR domain-containing protein 3 OS=Homo sapiens OX=9606 GN=LYPD3 PE=1 SV=2	LYPD3	35.97	1.919	2.122	1.794			1.439	0.412	0.368			0.38	0.116883
Q8NHS3	Major facilitator superfamily domain-containing protein 8 OS=Homo sapiens OX=9606 GN=MFSD8 PE=1 SV=1	MFSD8	57.627	0.777	0.567	1.561	1.008	1.42	0.803	0.933	0.641	2.29	2.265	1.3	0.58636
Q9NQ38	Serine protease inhibitor Kazal-type 5 OS=Homo sapiens OX=9606 GN=SPINK5 PE=1 SV=2	SPINK5	120.71	1.178	1.703	0.773			1.899	1.543	1.158			1.259	0.38766
Q12965	Unconventional myosin-Ie OS=Homo sapiens OX=9606 GN=MYO1E PE=1 SV=2	MYO1E	127.06	1.193	0.758	0.949	0.865	1.179	2.084	0.697	1.175	1.31	1.005	1.268	0.37122
O94766	Galactosylgalactosylxylosylprotein 3-beta-glucuronosyltransferase 3 OS=Homo sapiens OX=9606 GN=B3GAT3 PE=1 SV=2	B3GAT3	37.121	1.188	0.413	0.842				0.403				0.495
P12931	Proto-oncogene tyrosine-protein kinase Src OS=Homo sapiens OX=9606 GN=SRC PE=1 SV=3	SRC	59.834	0.7	0.974	1.015	0.949	2.737	1.028	1.03	1.325	0.719	0.63	0.742	0.46034
Q9UKW4	Guanine nucleotide exchange factor VAV3 OS=Homo sapiens OX=9606 GN=VAV3 PE=1 SV=1	VAV3	97.775	0.743	1.664	1.454			0.949	1.022	1.138			0.805	0.55816
Q9NRR6	Phosphatidylinositol polyphosphate 5-phosphatase type IV OS=Homo sapiens OX=9606 GN=INPP5E PE=1 SV=2	INPP5E	70.205	3.046	2.582	2.078			1.042	0.709	0.886			0.342	0.0024171
Q04609	Glutamate carboxypeptidase 2 OS=Homo sapiens OX=9606 GN=FOLH1 PE=1 SV=1	FOLH1	84.33	3.062	15.288	1.469			0.707	0.773	1.343			0.142	0.103517
Q96HP8	Transmembrane protein 176A OS=Homo sapiens OX=9606 GN=TMEM176A PE=2 SV=1	TMEM176A	26.116				0.395	0.49				1.201	2.118	3.75	0.051278
O00187	Mannan-binding lectin serine protease 2 OS=Homo sapiens OX=9606 GN=MASP2 PE=1 SV=4	MASP2	75.702	1.498	0.76	0.657	0.514	1.518	1.459	0.558	1.883	0.638	0.72	1.063	0.91148
Q99102	Mucin-4 OS=Homo sapiens OX=9606 GN=MUC4 PE=1 SV=4	MUC4	231.52	0.607	0.928	0.931	1.709	2.398	1.386	0.543	1.023	1.755	0.515	0.794	0.5337
P02746	Complement C1q subcomponent subunit B OS=Homo sapiens OX=9606 GN=C1QB PE=1 SV=3	C1QB	26.721	0.465					0.497	0.239	5.897			4.755
P13473	Lysosome-associated membrane glycoprotein 2 OS=Homo sapiens OX=9606 GN=LAMP2 PE=1 SV=2	LAMP2	44.96	0.721	0.763	0.729	0.752	1.005	0.964	1.263	0.709	1.458	2.025	1.617	0.054424
P29218	Inositol monophosphatase 1 OS=Homo sapiens OX=9606 GN=IMPA1 PE=1 SV=1	IMPA1	30.188	0.856	0.731	0.78			1.213	1.195	0.907			1.401	0.034681
O60282	Kinesin heavy chain isoform 5C OS=Homo sapiens OX=9606 GN=KIF5C PE=1 SV=1	KIF5C	109.49	1.696	11.094	1.002			0.951	0.877	1.332			0.229	0.27168
Q99808	Equilibrative nucleoside transporter 1 OS=Homo sapiens OX=9606 GN=SLC29A1 PE=1 SV=3	SLC29A1	50.219	0.762	0.856	0.534	0.476	0.48	1.122	1.804	1.204	0.847	0.689	1.823	0.022577
Q99497	Protein/nucleic acid deglycase DJ-1 OS=Homo sapiens OX=9606 GN=PARK7 PE=1 SV=2	PARK7	19.891	1.616	2.814	0.971	0.948	1.352	0.774	0.966	0.733	1.055	0.876	0.572	0.050961
Q8NHG7	Small VCP/p97-interacting protein OS=Homo sapiens OX=9606 GN=SVIP PE=1 SV=1	SVIP	8.4426	2.589	1.066	1.218	1.2	1.297	0.924	0.786	0.866	0.912	1.132	0.627	0.038925
O00757	"Fructose-1,6-bisphosphatase isozyme 2 OS=Homo sapiens OX=9606 GN=FBP2 PE=1 SV=2"	FBP2	36.743	1.313	0.757	1.059			0.753	1.475	0.822			0.975	0.86664
P16152	Carbonyl reductase [NADPH] 1 OS=Homo sapiens OX=9606 GN=CBR1 PE=1 SV=3	CBR1	30.375	0.791	1.422	0.98	0.786	1.152	0.899	1.235	0.76	0.584	0.658	0.806	0.23012
O75695	Protein XRP2 OS=Homo sapiens OX=9606 GN=RP2 PE=1 SV=4	RP2	39.641	0.668	0.881	1.139	1.714	1.359	2.735	0.597	0.961	1.151	0.686	1.064	0.88656
P62942	Peptidyl-prolyl cis-trans isomerase FKBP1A OS=Homo sapiens OX=9606 GN=FKBP1A PE=1 SV=2	FKBP1A	11.951	0.697	1.24	1.43	1.513	1.435	1.047	0.816	1.386	0.777	0.933	0.785	0.2334
O60784	Target of Myb protein 1 OS=Homo sapiens OX=9606 GN=TOM1 PE=1 SV=2	TOM1	53.818	1.333	0.856	1.095	0.723	0.696	0.955	1.258	1.252	1.22	1.121	1.235	0.11622
Q7Z4W1	L-xylulose reductase OS=Homo sapiens OX=9606 GN=DCXR PE=1 SV=2	DCXR	25.913	0.552	0.813	0.803	0.885	0.662	0.498	1.345	0.828	0.86	1.93	1.47	0.2652
P29350	Tyrosine-protein phosphatase non-receptor type 6 OS=Homo sapiens OX=9606 GN=PTPN6 PE=1 SV=1	PTPN6	67.56	1.193	1.12	1.057	1.429	1.201	1.215	0.988	1.185	0.965	1.004	0.893	0.146904
P02749	Beta-2-glycoprotein 1 OS=Homo sapiens OX=9606 GN=APOH PE=1 SV=3	APOH	38.298	1.17	0.462	0.782	0.808	0.929	2.182	0.569	0.817	0.443	1.174	1.249	0.75852
P08571	Monocyte differentiation antigen CD14 OS=Homo sapiens OX=9606 GN=CD14 PE=1 SV=2	CD14	40.076	0.702	1.461	0.235	0.653	0.308	0.476	1.932	0.685	1.937	1.482	1.939	0.133238
Q6Q0C0	E3 ubiquitin-protein ligase TRAF7 OS=Homo sapiens OX=9606 GN=TRAF7 PE=1 SV=1	TRAF7	74.608	0.598	0.637	1.616	1.201	2.764	2.191	0.803	0.74	1.401	0.651	0.849	0.77552
P20702	Integrin alpha-X OS=Homo sapiens OX=9606 GN=ITGAX PE=1 SV=3	ITGAX	127.83				2.816	0.958				2.094	1.625	0.985	0.85338
P09619	Platelet-derived growth factor receptor beta OS=Homo sapiens OX=9606 GN=PDGFRB PE=1 SV=1	PDGFRB	123.97	1.792	1.113	0.584			0.466	1.812	1.348			1.039	0.98902
Q8IWU5	Extracellular sulfatase Sulf-2 OS=Homo sapiens OX=9606 GN=SULF2 PE=1 SV=1	SULF2	100.45				0.62	1.051				0.427	0.343	0.461	0.120602
P42785	Lysosomal Pro-X carboxypeptidase OS=Homo sapiens OX=9606 GN=PRCP PE=1 SV=1	PRCP	55.799	0.671	1.085	1.421	0.35	0.95	0.397	1.149	1.056	1.024	0.842	0.998	0.90612
P60903	Protein S100-A10 OS=Homo sapiens OX=9606 GN=S100A10 PE=1 SV=2	S100A10	11.203	0.296	0.385	0.297	0.271	0.301	1.337	0.844	1.804	1.232	1.025	4.027	1.52904e-05
Q9UIA9	Exportin-7 OS=Homo sapiens OX=9606 GN=XPO7 PE=1 SV=3	XPO7	123.91	1.138	1.379	0.845			1.097	1.253	1.261			1.074	0.58268
P14923	Junction plakoglobin OS=Homo sapiens OX=9606 GN=JUP PE=1 SV=3	JUP	81.744	0.684	0.752	0.653	1.052	0.698	1.663	0.707	1.635	0.535	0.938	1.427	0.2907
Q12792	Twinfilin-1 OS=Homo sapiens OX=9606 GN=TWF1 PE=1 SV=3	TWF1	40.282	1.743	0.584	2.193	1.87	2.323	1.361	0.472	0.448	1.325	0.918	0.519	0.094497
Q96S99	Pleckstrin homology domain-containing family F member 1 OS=Homo sapiens OX=9606 GN=PLEKHF1 PE=1 SV=3	PLEKHF1	31.194	0.731	0.726	1.439	0.794	2.396	0.931	0.622	0.806	1.063	0.565	0.655	0.24962
P31153	S-adenosylmethionine synthase isoform type-2 OS=Homo sapiens OX=9606 GN=MAT2A PE=1 SV=1	MAT2A	43.66	1.045	0.881	0.923	0.563	1.278	0.34	1.135	1.068	0.921	1.148	0.983	0.80696
Q9H2K8	Serine/threonine-protein kinase TAO3 OS=Homo sapiens OX=9606 GN=TAOK3 PE=1 SV=2	TAOK3	105.4	0.974	1.03	1.311	0.777	1.623	1.297	0.558	0.897	0.889	0.673	0.755	0.167964
Q6GTX8	Leukocyte-associated immunoglobulin-like receptor 1 OS=Homo sapiens OX=9606 GN=LAIR1 PE=1 SV=1	LAIR1	31.412	0.684	1.162	0.843	1.585	0.731	2.243	1.644	0.897	0.887	0.731	1.279	0.46462
P15531	Nucleoside diphosphate kinase A OS=Homo sapiens OX=9606 GN=NME1 PE=1 SV=1	NME1	17.149	0.789	0.735	0.593	0.486	0.456	1.171	1.207	1.08	1.598	1.292	2.075	0.00038168
Q13332	Receptor-type tyrosine-protein phosphatase S OS=Homo sapiens OX=9606 GN=PTPRS PE=1 SV=3	PTPRS	217.04	0.482	1.049	0.301	0.593	0.755	0.409	1.06	2.105	1.058	0.567	1.635	0.27188
Q9NQX4	Unconventional myosin-Vc OS=Homo sapiens OX=9606 GN=MYO5C PE=1 SV=2	MYO5C	202.81	0.822	3.471	0.703			0.816	1.024	1.289			0.626	0.7132
Q9NUQ8	ATP-binding cassette sub-family F member 3 OS=Homo sapiens OX=9606 GN=ABCF3 PE=1 SV=2	ABCF3	79.744	1.242	3.026	1.208			0.692	0.752	0.67			0.386	0.106197
Q6UXB8	Peptidase inhibitor 16 OS=Homo sapiens OX=9606 GN=PI16 PE=1 SV=1	PI16	49.471				0.902	1.025				0.675	0.611	0.667	0.03802
Q9NVG8	TBC1 domain family member 13 OS=Homo sapiens OX=9606 GN=TBC1D13 PE=1 SV=3	TBC1D13	46.553	0.861	0.79	0.644	0.595	0.358	0.695	1.902	0.678	0.862	1.145	1.626	0.104255
Q15008	26S proteasome non-ATPase regulatory subunit 6 OS=Homo sapiens OX=9606 GN=PSMD6 PE=1 SV=1	PSMD6	45.531	2.687	1.677	0.877			1.152	1.178	1.712			0.771	0.63866
P36543	V-type proton ATPase subunit E 1 OS=Homo sapiens OX=9606 GN=ATP6V1E1 PE=1 SV=1	ATP6V1E1	26.145	1.14	0.887	1.103			0.699	0.997	1.494			1.019	0.92636
P12644	Bone morphogenetic protein 4 OS=Homo sapiens OX=9606 GN=BMP4 PE=1 SV=1	BMP4	46.554	0.279		0.264	0.307	0.333	0.271	2.519	0.941	0.123	1.605	3.692	0.22512
Q06278	Aldehyde oxidase OS=Homo sapiens OX=9606 GN=AOX1 PE=1 SV=2	AOX1	147.92	1.502	0.852	0.781			0.5	1.801	0.592			0.923	0.6666
Q86VX2	COMM domain-containing protein 7 OS=Homo sapiens OX=9606 GN=COMMD7 PE=1 SV=2	COMMD7	22.54	0.602	0.628	0.523	0.848	0.459	0.475	1.228	0.655	1.713	1.624	1.861	0.09256
Q96NY7	Chloride intracellular channel protein 6 OS=Homo sapiens OX=9606 GN=CLIC6 PE=2 SV=3	CLIC6	73.011	0.484	0.369	5.96	1.852	3.089	0.414	0.161	0.826	1.423	1.289	0.35	0.25626
P61586	Transforming protein RhoA OS=Homo sapiens OX=9606 GN=RHOA PE=1 SV=1	RHOA	21.768	0.457	0.578	2.35	1.146	1.797	0.975	0.958	0.861	0.906	1.086	0.756	0.77802
P25325	3-mercaptopyruvate sulfurtransferase OS=Homo sapiens OX=9606 GN=MPST PE=1 SV=3	MPST	33.178	0.8	0.581	0.715	0.809	0.567	0.69	1.973	2.009	0.497	0.554	1.648	0.3721
P50591	Tumor necrosis factor ligand superfamily member 10 OS=Homo sapiens OX=9606 GN=TNFSF10 PE=1 SV=1	TNFSF10	32.509	0.908	1.307	0.99			1.653	1.453	1.082			1.307	0.187701
Q9BSQ5	Cerebral cavernous malformations 2 protein OS=Homo sapiens OX=9606 GN=CCM2 PE=1 SV=1	CCM2	48.836	1.166	1.497	1.413	1.544	3.393	0.993	0.972	1.155	0.855	0.747	0.524	0.0191577
Q9Y376	Calcium-binding protein 39 OS=Homo sapiens OX=9606 GN=CAB39 PE=1 SV=1	CAB39	39.869	0.834	0.804	2.074	0.418	0.359	1.112	0.709	0.821	1.126	1.76	1.231	0.32712
Q9HBG4	V-type proton ATPase 116 kDa subunit a isoform 4 OS=Homo sapiens OX=9606 GN=ATP6V0A4 PE=1 SV=2	ATP6V0A4	96.385	0.712	0.651	1.361	0.705	0.358	0.874	1.031	1.33	0.967	0.416	1.219	0.46406
Q6ZP29	Lysosomal amino acid transporter 1 homolog OS=Homo sapiens OX=9606 GN=SLC66A1 PE=1 SV=1	SLC66A1	31.947	2.791	1.792	1.634			0.651	0.737	0.777			0.348	0.0040381
Q68CP4	Heparan-alpha-glucosaminide N-acetyltransferase OS=Homo sapiens OX=9606 GN=HGSNAT PE=1 SV=2	HGSNAT	73.293	2.086	1.743	1.643	0.464	0.65	1.138	1.375	0.846	1.677	1.643	1.014	0.67674
Q1MSJ5	Centrosome and spindle pole-associated protein 1 OS=Homo sapiens OX=9606 GN=CSPP1 PE=1 SV=4	CSPP1	145.52	2.437	0.843	1.256	0.835	0.81	0.903	0.937	0.811	0.869	1.247	0.771	0.4671
Q8IZP0	Abl interactor 1 OS=Homo sapiens OX=9606 GN=ABI1 PE=1 SV=4	ABI1	55.08	0.765	1.215	0.675	1.227	1.629	1.343	1.085	1.046	1.032	1.099	1.017	0.72522
P17301	Integrin alpha-2 OS=Homo sapiens OX=9606 GN=ITGA2 PE=1 SV=1	ITGA2	129.29				2.621	1.14				0.914	1.237	0.572	0.38706
O94832	Unconventional myosin-Id OS=Homo sapiens OX=9606 GN=MYO1D PE=1 SV=2	MYO1D	116.2	1.045	1.005	1.888	1.07	3.7	1.361	0.876	1.076	1.169	0.764	0.602	0.195364
P48729	Casein kinase I isoform alpha OS=Homo sapiens OX=9606 GN=CSNK1A1 PE=1 SV=2	CSNK1A1	38.914	1.789	0.564	1.583			0.702	1.069	0.977			0.698	0.53994
P52758	2-iminobutanoate/2-iminopropanoate deaminase OS=Homo sapiens OX=9606 GN=RIDA PE=1 SV=1	RIDA	14.494	4.245	1.165	1.526	2.183	2.183	1.457	0.358	0.341	1.975	0.17	0.381	0.037898
P01859	Immunoglobulin heavy constant gamma 2 OS=Homo sapiens OX=9606 GN=IGHG2 PE=1 SV=2	IGHG2	35.9	0.634	0.277	0.693	0.918	0.345	2.4	0.829	3.644	0.697	1.66	3.219	0.023358
P12109	Collagen alpha-1(VI) chain OS=Homo sapiens OX=9606 GN=COL6A1 PE=1 SV=3	COL6A1	108.53	0.763	0.678	0.483			0.754	1.402	2.084			2.204	0.090078
P33908	"Mannosyl-oligosaccharide 1,2-alpha-mannosidase IA OS=Homo sapiens OX=9606 GN=MAN1A1 PE=1 SV=3"	MAN1A1	72.968	0.862	1.178	0.395	0.22	0.668	0.491	0.386	2.925	0.334	0.416	1.37	0.9173
P42356	Phosphatidylinositol 4-kinase alpha OS=Homo sapiens OX=9606 GN=PI4KA PE=1 SV=4	PI4KA	236.83	1.637	1.055	0.965	0.939	1.053	2.005	0.99	1.067	0.892	0.755	1.011	0.88584
P60983	Glia maturation factor beta OS=Homo sapiens OX=9606 GN=GMFB PE=1 SV=2	GMFB	16.713	1.821	0.977	1.261	0.779	1.267	0.753	1.397	1.485	0.827	1.125	0.915	0.68032
Q8TE68	Epidermal growth factor receptor kinase substrate 8-like protein 1 OS=Homo sapiens OX=9606 GN=EPS8L1 PE=1 SV=3	EPS8L1	80.25	1.106	1.031	1.141	0.641	2.162	1.82	0.841	1.692	1.001	1.119	1.064	0.7082
P30613	Pyruvate kinase PKLR OS=Homo sapiens OX=9606 GN=PKLR PE=1 SV=2	PKLR	61.829	0.716	1.066	0.813			0.762	1.864	1.179			1.466	0.3082
P50991	T-complex protein 1 subunit delta OS=Homo sapiens OX=9606 GN=CCT4 PE=1 SV=4	CCT4	57.924	0.542	4.027	0.245			0.506	0.871	1.698			0.639	0.9073
P23396	40S ribosomal protein S3 OS=Homo sapiens OX=9606 GN=RPS3 PE=1 SV=2	RPS3	26.688	0.844	2.069	0.535			1.021	1.052	1.998			1.181	0.57416
P15313	"V-type proton ATPase subunit B, kidney isoform OS=Homo sapiens OX=9606 GN=ATP6V1B1 PE=1 SV=3"	ATP6V1B1	56.832	1.192	1.011	1.135	1.058	0.683	0.756	0.809	1.728	0.867	0.696	0.956	0.65848
Q96KP4	Cytosolic non-specific dipeptidase OS=Homo sapiens OX=9606 GN=CNDP2 PE=1 SV=2	CNDP2	52.878	0.976	0.924	1.022	0.842	1.491	0.69	1.553	0.911	1.231	1.533	1.126	0.6284
O43451	"Maltase-glucoamylase, intestinal OS=Homo sapiens OX=9606 GN=MGAM PE=1 SV=5"	MGAM	209.85	0.844	0.75	0.894	0.649	0.597	1.82	1.876	1.002	1.454	0.855	1.877	0.0096765
P11586	"C-1-tetrahydrofolate synthase, cytoplasmic OS=Homo sapiens OX=9606 GN=MTHFD1 PE=1 SV=3"	MTHFD1	101.56	1.533	1.074	0.941	0.57	0.79	0.722	1.421	1.336	0.73	1.46	1.155	0.53952
Q9NRX5	Serine incorporator 1 OS=Homo sapiens OX=9606 GN=SERINC1 PE=1 SV=1	SERINC1	50.494	1.062	2.192	1.2			1.97	0.667	0.699			0.749	0.42564
P14209	CD99 antigen OS=Homo sapiens OX=9606 GN=CD99 PE=1 SV=1	CD99	18.848	5.384	2.16	2.129			1.127	0.377	0.241			0.18	0.029456
P62070	Ras-related protein R-Ras2 OS=Homo sapiens OX=9606 GN=RRAS2 PE=1 SV=1	RRAS2	23.399	1.485	0.872	1.178	0.755	0.903	0.738	1.318	0.912	1.022	1.118	0.984	0.97436
Q8WWT9	Solute carrier family 13 member 3 OS=Homo sapiens OX=9606 GN=SLC13A3 PE=1 SV=1	SLC13A3	66.84	2.046	0.736	0.881	0.332	0.277	0.361	3.277	0.434	0.391	0.519	1.166	0.95558
Q8TCC7	Solute carrier family 22 member 8 OS=Homo sapiens OX=9606 GN=SLC22A8 PE=1 SV=1	SLC22A8	59.856	1.517	0.245	0.56			1.497	0.434	0.728			1.145	0.68998
P23468	Receptor-type tyrosine-protein phosphatase delta OS=Homo sapiens OX=9606 GN=PTPRD PE=1 SV=2	PTPRD	214.76	1.668	0.94	0.74			0.888	1.694	1.134			1.11	0.6961
Q8NEU8	DCC-interacting protein 13-beta OS=Homo sapiens OX=9606 GN=APPL2 PE=1 SV=3	APPL2	74.493	0.856	0.92	0.973	0.495	0.332	0.532	1.161	1.03	1.447	0.56	1.323	0.36056
P45880	Voltage-dependent anion-selective channel protein 2 OS=Homo sapiens OX=9606 GN=VDAC2 PE=1 SV=2	VDAC2	31.566	0.874	0.812	1.683	0.791	0.684	0.973	0.924	0.789	2.068	1.456	1.282	0.34
Q5VZK9	F-actin-uncapping protein LRRC16A OS=Homo sapiens OX=9606 GN=CARMIL1 PE=1 SV=1	CARMIL1	151.56	1.588	1.167	1.103	0.897	1.733	1.539	0.595	0.847	0.705	1.117	0.74	0.150999
Q9Y3E7	Charged multivesicular body protein 3 OS=Homo sapiens OX=9606 GN=CHMP3 PE=1 SV=3	CHMP3	25.073	0.68	1.404	1.218			0.588	0.955	0.843			0.723	0.3218
Q08722	Leukocyte surface antigen CD47 OS=Homo sapiens OX=9606 GN=CD47 PE=1 SV=1	CD47	35.213	0.785	0.582	0.488	1.676	0.635	2.856	1.169	1.645	0.825	1.103	1.824	0.078517
Q96HD9	N-acyl-aromatic-L-amino acid amidohydrolase (carboxylate-forming) OS=Homo sapiens OX=9606 GN=ACY3 PE=1 SV=1	ACY3	35.241	0.791	0.569	0.954	0.891	1.016	1.079	2.144	0.791	0.764	0.947	1.356	0.28426
P01034	Cystatin-C OS=Homo sapiens OX=9606 GN=CST3 PE=1 SV=1	CST3	15.799	1.062	0.893	0.628	0.998	0.54	0.872	1.057	1.297	1.601	0.931	1.397	0.083903
O00506	Serine/threonine-protein kinase 25 OS=Homo sapiens OX=9606 GN=STK25 PE=1 SV=1	STK25	48.111	0.922	0.234	1.453			0.856	0.999	1.046			1.112	0.59148
P06731	Carcinoembryonic antigen-related cell adhesion molecule 5 OS=Homo sapiens OX=9606 GN=CEACAM5 PE=1 SV=3	CEACAM5	76.794	0.442	0.477	0.623	1.6	3.799	1.537	0.621	2.44	0.531	1.094	0.897	0.83864
P04040	Catalase OS=Homo sapiens OX=9606 GN=CAT PE=1 SV=3	CAT	59.755	0.369	1.04	0.53	2.192	0.821	4.67	0.527	1.018	1.637	0.859	1.759	0.37196
A0PJK1	Sodium/glucose cotransporter 5 OS=Homo sapiens OX=9606 GN=SLC5A10 PE=1 SV=2	SLC5A10	64.342	1.217	0.539	1.57	0.788	0.737	0.668	2.47	0.55	1.312	0.767	1.189	0.80506
P61020	Ras-related protein Rab-5B OS=Homo sapiens OX=9606 GN=RAB5B PE=1 SV=1	RAB5B	23.707	2.055	1.572	1.539	1.222	1.615	1.136	1.001	0.666	1.435	0.918	0.644	0.016323
P01871	Immunoglobulin heavy constant mu OS=Homo sapiens OX=9606 GN=IGHM PE=1 SV=4	IGHM	49.439	0.562	0.646	0.419	0.516	0.497	0.386	0.343	5.56	0.382	2.961	3.648	0.36512
P04279	Semenogelin-1 OS=Homo sapiens OX=9606 GN=SEMG1 PE=1 SV=2	SEMG1	52.13	1.598	15.891	1.322	0.669	0.346	0.862	0.702	0.753	3.023	0.264	0.283	0.44104
O60271	C-Jun-amino-terminal kinase-interacting protein 4 OS=Homo sapiens OX=9606 GN=SPAG9 PE=1 SV=4	SPAG9	146.2	1.255	1.165	0.981	1.009	0.92	1.26	1.037	0.583	1.033	1.616	1.037	0.96002
Q32P51	Heterogeneous nuclear ribonucleoprotein A1-like 2 OS=Homo sapiens OX=9606 GN=HNRNPA1L2 PE=2 SV=2	HNRNPA1L2	34.225	0.595	0.962	0.592			2.328	1.445	1.824			2.604	0.0103597
A0A0G2JS06	Immunoglobulin lambda variable 5-39 OS=Homo sapiens OX=9606 GN=IGLV5-39 PE=3 SV=1	IGLV5-39	13.394	1.731	28.933	3.714			2.025	0.727				0.12	0.27108
Q9NVC3	Putative sodium-coupled neutral amino acid transporter 7 OS=Homo sapiens OX=9606 GN=SLC38A7 PE=1 SV=1	SLC38A7	49.965				0.625	1.337				1.399	1.487	1.471	0.35438
Q6UXB3	Ly6/PLAUR domain-containing protein 2 OS=Homo sapiens OX=9606 GN=LYPD2 PE=2 SV=1	LYPD2	13.115	0.988	2.958	1.533			0.881	0.596	1.03			0.458	0.12018
Q8NEZ2	Vacuolar protein sorting-associated protein 37A OS=Homo sapiens OX=9606 GN=VPS37A PE=1 SV=1	VPS37A	44.314				1.089	0.503				1.386	2.037	2.15	0.197824
P09417	Dihydropteridine reductase OS=Homo sapiens OX=9606 GN=QDPR PE=1 SV=2	QDPR	25.789	0.962	1.373	0.807			0.919	1.337	0.908			1.007	0.94344
P01780	Immunoglobulin heavy variable 3-7 OS=Homo sapiens OX=9606 GN=IGHV3-7 PE=1 SV=2	IGHV3-7	12.943	1.141	0.662	0.699			0.78	0.561	3.497			1.934	0.5796
P32942	Intercellular adhesion molecule 3 OS=Homo sapiens OX=9606 GN=ICAM3 PE=1 SV=2	ICAM3	59.54	1.233	1.219	0.968	4.72	1.183	1.279	0.197	0.817	0.656	0.892	0.412	0.085137
O14493	Claudin-4 OS=Homo sapiens OX=9606 GN=CLDN4 PE=1 SV=1	CLDN4	22.077				0.904	0.312				1.726	0.877	2.141	0.31424
Q86VL8	Multidrug and toxin extrusion protein 2 OS=Homo sapiens OX=9606 GN=SLC47A2 PE=1 SV=1	SLC47A2	65.084	1.763	0.842	3.631			0.624	0.477	0.404			0.241	0.045122
O00534	von Willebrand factor A domain-containing protein 5A OS=Homo sapiens OX=9606 GN=VWA5A PE=2 SV=2	VWA5A	86.488	0.722	1.319	0.527			0.82	1.492	2.032			1.692	0.23176
P00966	Argininosuccinate synthase OS=Homo sapiens OX=9606 GN=ASS1 PE=1 SV=2	ASS1	46.53	0.617	0.64	0.683	0.913	1.068	0.843	1.722	1.257	0.863	1.215	1.505	0.048996
Q969P5	F-box only protein 32 OS=Homo sapiens OX=9606 GN=FBXO32 PE=1 SV=1	FBXO32	41.637				0.336	0.775					8.157	14.684
P00558	Phosphoglycerate kinase 1 OS=Homo sapiens OX=9606 GN=PGK1 PE=1 SV=3	PGK1	44.614	1.442	0.831	1.055	1.035	1.187	0.996	0.751	1.187	0.878	1.052	0.876	0.3166
Q13347	Eukaryotic translation initiation factor 3 subunit I OS=Homo sapiens OX=9606 GN=EIF3I PE=1 SV=1	EIF3I	36.501	1.783	1.093	0.919			0.97	1	1.72			0.972	0.93496
P0DOX4	Immunoglobulin epsilon heavy chain OS=Homo sapiens OX=9606 PE=1 SV=1	---	60.322	0.6	0.753	0.604	0.34	0.619	9.844	0.933	1.813	0.603	0.659	4.75	0.148918
Q53GD3	Choline transporter-like protein 4 OS=Homo sapiens OX=9606 GN=SLC44A4 PE=1 SV=2	SLC44A4	79.253	0.98	1.538	1.11	1.341	2.007	0.505	1.456	1.293	0.624	0.955	0.693	0.121959
O95263	"High affinity cAMP-specific and IBMX-insensitive 3',5'-cyclic phosphodiesterase 8B OS=Homo sapiens OX=9606 GN=PDE8B PE=1 SV=2"	PDE8B	98.978				0.798	1.02				0.92	0.672	0.876	0.56154
O00501	Claudin-5 OS=Homo sapiens OX=9606 GN=CLDN5 PE=2 SV=1	CLDN5	23.147	0.418	0.625	0.239			0.74	4.251	1.291			4.9	0.076476
P34896	"Serine hydroxymethyltransferase, cytosolic OS=Homo sapiens OX=9606 GN=SHMT1 PE=1 SV=1"	SHMT1	53.082	0.962	1.226	1.047	0.458	0.494	0.827	0.976	1.151	1.117	2.034	1.458	0.149698
Q7Z4V5	Hepatoma-derived growth factor-related protein 2 OS=Homo sapiens OX=9606 GN=HDGFL2 PE=1 SV=1	HDGFL2	74.316				0.569	2.065				0.824	0.191	0.385	0.41074
Q9UGM3	Deleted in malignant brain tumors 1 protein OS=Homo sapiens OX=9606 GN=DMBT1 PE=1 SV=2	DMBT1	260.73	1.194	1.821	0.797	1.089	1.52	0.747	0.828	3.639	0.417	0.591	0.969	0.43264
Q8N4C8	Misshapen-like kinase 1 OS=Homo sapiens OX=9606 GN=MINK1 PE=1 SV=2	MINK1	149.82	1.296	1.772	1.533	1.151	1.95	1.565	1.278	0.884	1.108	0.806	0.732	0.071124
A8MUH7	Putative PDZ domain-containing protein PDZK1P1 OS=Homo sapiens OX=9606 GN=PDZK1P1 PE=5 SV=2	PDZK1P1	44.055	1.171	8.113	0.755			0.66	0.644	0.419			0.172	0.1732
P13798	Acylamino-acid-releasing enzyme OS=Homo sapiens OX=9606 GN=APEH PE=1 SV=4	APEH	81.224	0.637	1.01	0.722			1.586	0.883	0.963			1.449	0.195039
O00391	Sulfhydryl oxidase 1 OS=Homo sapiens OX=9606 GN=QSOX1 PE=1 SV=3	QSOX1	82.577	3.804	2.426	2.474	1.35	0.716	1.815		1.102	1.248	0.906	0.589	0.27798
Q16513	Serine/threonine-protein kinase N2 OS=Homo sapiens OX=9606 GN=PKN2 PE=1 SV=1	PKN2	112.03				1.425	2.777				1.129	0.85	0.471	0.189921
P08246	Neutrophil elastase OS=Homo sapiens OX=9606 GN=ELANE PE=1 SV=1	ELANE	28.518				6.786	1.075				1.183	0.968	0.274	0.42302
O94885	SAM and SH3 domain-containing protein 1 OS=Homo sapiens OX=9606 GN=SASH1 PE=1 SV=3	SASH1	136.65				4.576	5.071				5.624	6.035	1.209	0.092681
Q07837	Neutral and basic amino acid transport protein rBAT OS=Homo sapiens OX=9606 GN=SLC3A1 PE=1 SV=2	SLC3A1	78.851	1.004	0.772	0.813	0.714	0.93	1.276	1.528	0.793	0.954	1.995	1.546	0.056918
Q8NFI4	Putative protein FAM10A5 OS=Homo sapiens OX=9606 GN=ST13P5 PE=5 SV=1	ST13P5	41.377				0.667	0.992				0.945	1.758	1.629	0.3379
P52799	Ephrin-B2 OS=Homo sapiens OX=9606 GN=EFNB2 PE=1 SV=1	EFNB2	36.923	1	0.903	0.63	0.223	0.591	0.623	1.025	0.609	0.698	0.322	0.979	0.927
P52566	Rho GDP-dissociation inhibitor 2 OS=Homo sapiens OX=9606 GN=ARHGDIB PE=1 SV=3	ARHGDIB	22.988	1.02	1.753	1.266	1.836	1.37	4.436	0.659	1.071	1.653	0.849	1.196	0.88646
P07737	Profilin-1 OS=Homo sapiens OX=9606 GN=PFN1 PE=1 SV=2	PFN1	15.054	0.758	4.009	0.598			1.123	0.675	0.513			0.431	0.4677
Q68EM7	Rho GTPase-activating protein 17 OS=Homo sapiens OX=9606 GN=ARHGAP17 PE=1 SV=1	ARHGAP17	95.436	2.573	1.153	1.714			1.891	0.779	0.916			0.659	0.28414
Q9H8S9	MOB kinase activator 1A OS=Homo sapiens OX=9606 GN=MOB1A PE=1 SV=4	MOB1A	25.079	2.155	1.319	0.941			0.92	1.141	0.83			0.655	0.22114
Q9Y5S2	Serine/threonine-protein kinase MRCK beta OS=Homo sapiens OX=9606 GN=CDC42BPB PE=1 SV=2	CDC42BPB	194.31	0.829	0.781	1.239	1.056	1.215	0.886	1.02	0.835	1.462	1.206	1.056	0.72382
O75223	Gamma-glutamylcyclotransferase OS=Homo sapiens OX=9606 GN=GGCT PE=1 SV=1	GGCT	21.007	1.756	0.748	1.052	1.218	1.088	1.796	1.699	0.995	1.054	0.825	1.086	0.73208
Q9UJ70	N-acetyl-D-glucosamine kinase OS=Homo sapiens OX=9606 GN=NAGK PE=1 SV=4	NAGK	37.375				1.21	1.916				0.856	0.697	0.497	0.114442
O14791	Apolipoprotein L1 OS=Homo sapiens OX=9606 GN=APOL1 PE=1 SV=5	APOL1	43.974	1.02	1.059	0.727	0.64	0.405	0.522	0.469	2.487	0.237	1.983	1.48	0.89136
Q4U2R8	Solute carrier family 22 member 6 OS=Homo sapiens OX=9606 GN=SLC22A6 PE=1 SV=1	SLC22A6	61.816	2.354	0.677	1.086	1.179	0.53	1.834	0.216	0.289	1.634	1.073	0.866	0.53158
Q9BU68	Proline-rich protein 15-like protein OS=Homo sapiens OX=9606 GN=PRR15L PE=3 SV=1	PRR15L	11.705				2.744	2.458				0.466	0.347	0.156	0.0070409
Q9NR20	Dual specificity tyrosine-phosphorylation-regulated kinase 4 OS=Homo sapiens OX=9606 GN=DYRK4 PE=1 SV=2	DYRK4	59.608				0.462	0.432				1.458	1.708	3.541	0.0046036
Q969Q5	Ras-related protein Rab-24 OS=Homo sapiens OX=9606 GN=RAB24 PE=1 SV=1	RAB24	23.124				0.924	1.087				0.939	1.219	1.073	0.71206
P61006	Ras-related protein Rab-8A OS=Homo sapiens OX=9606 GN=RAB8A PE=1 SV=1	RAB8A	23.668	2.762	0.868	2.872	1.003	1.042	1.001	0.346	0.595	0.715	1.022	0.43	0.04724
P17858	"ATP-dependent 6-phosphofructokinase, liver type OS=Homo sapiens OX=9606 GN=PFKL PE=1 SV=6"	PFKL	85.018	1.244	1.048	0.63			0.317	0.923	0.988			0.762	0.45482
P68036	Ubiquitin-conjugating enzyme E2 L3 OS=Homo sapiens OX=9606 GN=UBE2L3 PE=1 SV=1	UBE2L3	17.861	0.938	0.717	0.614	1.076	1.15	1.77	1.263	0.937	1.2	1.227	1.423	0.051364
O75351	Vacuolar protein sorting-associated protein 4B OS=Homo sapiens OX=9606 GN=VPS4B PE=1 SV=2	VPS4B	49.301	1.208	0.748	0.831	0.668	0.907	0.762	1.378	1.078	1.012	1.005	1.2	0.21544
O14495	Phospholipid phosphatase 3 OS=Homo sapiens OX=9606 GN=PLPP3 PE=1 SV=1	PLPP3	35.116	0.671	0.896	0.657	0.496	0.371	0.932	1.531	0.629	1.063	1.025	1.676	0.036004
Q15370	Elongin-B OS=Homo sapiens OX=9606 GN=ELOB PE=1 SV=1	ELOB	13.133	0.802	1.381	0.822			1.439	1.618	1.314			1.455	0.097018
Q9UBR1	Beta-ureidopropionase OS=Homo sapiens OX=9606 GN=UPB1 PE=1 SV=1	UPB1	43.166	1.095	1.449	0.733			0.673	0.408	0.365			0.441	0.0402
P78310	Coxsackievirus and adenovirus receptor OS=Homo sapiens OX=9606 GN=CXADR PE=1 SV=1	CXADR	40.029	0.933	0.475	0.315	1.348	1.507	0.599	2.094	1.499	0.826	1.535	1.431	0.294
Q9NX57	Ras-related protein Rab-20 OS=Homo sapiens OX=9606 GN=RAB20 PE=1 SV=1	RAB20	26.277	0.344	0.567	1.25	1.192	2.096	1.191	1.076	1.063	1.392	0.999	1.05	0.52302
P30085	UMP-CMP kinase OS=Homo sapiens OX=9606 GN=CMPK1 PE=1 SV=3	CMPK1	22.222	1.522	2.808	1.171	1.106	1.714	1.294	1.628	0.904	1.285	0.887	0.721	0.184842
P01834	Immunoglobulin kappa constant OS=Homo sapiens OX=9606 GN=IGKC PE=1 SV=2	IGKC	11.765	0.383	3.059	1.15			1.406	0.385	1.493			0.715	0.83042
O95436	Sodium-dependent phosphate transport protein 2B OS=Homo sapiens OX=9606 GN=SLC34A2 PE=1 SV=3	SLC34A2	75.759	0.616	3.23	0.88	0.45	0.56	8.324	0.813	0.584	0.417	0.286	1.817	0.9852
Q9NP58	"ATP-binding cassette sub-family B member 6, mitochondrial OS=Homo sapiens OX=9606 GN=ABCB6 PE=1 SV=1"	ABCB6	93.884	1.077	1.036	1.447			0.987	1.105	0.637			0.767	0.22944
Q08380	Galectin-3-binding protein OS=Homo sapiens OX=9606 GN=LGALS3BP PE=1 SV=1	LGALS3BP	65.33	1.185	0.819	0.951	1.029	0.802	1.115	1.228	1.32	0.839	0.816	1.111	0.45108
Q9H2M3	S-methylmethionine--homocysteine S-methyltransferase BHMT2 OS=Homo sapiens OX=9606 GN=BHMT2 PE=1 SV=1	BHMT2	40.354	1.644	0.935	0.768	0.655	0.733	0.679	1.136	0.838	1.093	1.166	1.037	0.7101
P41743	Protein kinase C iota type OS=Homo sapiens OX=9606 GN=PRKCI PE=1 SV=2	PRKCI	68.262	0.782	0.911	1.988			1.132	0.745	1.131			0.817	0.70228
O95372	Acyl-protein thioesterase 2 OS=Homo sapiens OX=9606 GN=LYPLA2 PE=1 SV=1	LYPLA2	24.737	0.906	0.485	1.456	1.271	1.068	1.623	0.832	1.334	0.7	0.835	1.027	0.88104
A0A0B4J1X5	Immunoglobulin heavy variable 3-74 OS=Homo sapiens OX=9606 GN=IGHV3-74 PE=3 SV=1	IGHV3-74	12.839		0.453		0.942	0.887	11.964	0.545	0.995	1.617	1.085	4.261	0.30648
Q03001	Dystonin OS=Homo sapiens OX=9606 GN=DST PE=1 SV=4	DST	860.65	0.772	1.005	1.35			1.239	0.849	1.103			1.02	0.87052
Q03431	Parathyroid hormone/parathyroid hormone-related peptide receptor OS=Homo sapiens OX=9606 GN=PTH1R PE=1 SV=1	PTH1R	66.36	0.866	1.203	0.713	0.496	0.831	0.421	1.74	0.932	0.781	1.376	1.278	0.55604
Q7RTY1	Monocarboxylate transporter 9 OS=Homo sapiens OX=9606 GN=SLC16A9 PE=1 SV=1	SLC16A9	55.793	0.564	0.689	0.434	0.297	0.357	0.278	0.827	0.459	0.496	0.742	1.197	0.54608
Q9BW30	Tubulin polymerization-promoting protein family member 3 OS=Homo sapiens OX=9606 GN=TPPP3 PE=1 SV=1	TPPP3	18.985	1.213	0.534	0.35			0.529	2.067	2.192			2.283	0.25398
P60660	Myosin light polypeptide 6 OS=Homo sapiens OX=9606 GN=MYL6 PE=1 SV=2	MYL6	16.93	2.304	1.22	1.992	1.1	1.901	1.165	0.308	0.325	1.093	0.88	0.443	0.022255
Q9UH65	Switch-associated protein 70 OS=Homo sapiens OX=9606 GN=SWAP70 PE=1 SV=1	SWAP70	68.997				1.304	1.644				0.259	0.388	0.219	0.0224
O43374	Ras GTPase-activating protein 4 OS=Homo sapiens OX=9606 GN=RASA4 PE=2 SV=2	RASA4	90.457	1.024	0.899	0.622			0.711	1.719	0.549			1.171	0.8951
Q04917	14-3-3 protein eta OS=Homo sapiens OX=9606 GN=YWHAH PE=1 SV=4	YWHAH	28.218	1.008	0.748	1.004	1.301	1.688	1.178	1.187	1.161	1.158	1.163	1.017	0.71006
Q9UIJ5	Palmitoyltransferase ZDHHC2 OS=Homo sapiens OX=9606 GN=ZDHHC2 PE=1 SV=1	ZDHHC2	42.021	1.203	0.602	0.818	0.753	0.821	1.29	1.159	0.55	0.738	1.208	1.178	0.50794
O94772	Lymphocyte antigen 6H OS=Homo sapiens OX=9606 GN=LY6H PE=1 SV=1	LY6H	14.669	1.459	1.269	1.024			2.99	1.61	0.342			1.317	0.94912
Q9UMS6	Synaptopodin-2 OS=Homo sapiens OX=9606 GN=SYNPO2 PE=1 SV=2	SYNPO2	117.51	0.963	0.097	0.086	0.39	0.156	0.104	0.427	0.272	4.508	0.196	3.255	0.45816
Q9UKK3	Protein mono-ADP-ribosyltransferase PARP4 OS=Homo sapiens OX=9606 GN=PARP4 PE=1 SV=3	PARP4	192.59	0.787	0.503	0.348	0.823	0.89	0.557	0.88	1.322	0.779	1.943	1.636	0.144644
O76027	Annexin A9 OS=Homo sapiens OX=9606 GN=ANXA9 PE=1 SV=3	ANXA9	38.363	0.627	2.549	1.373	0.91	4.543	1.3	0.774	1.515	1.623	0.514	0.572	0.37466
P27169	Serum paraoxonase/arylesterase 1 OS=Homo sapiens OX=9606 GN=PON1 PE=1 SV=3	PON1	39.731	0.508	0.352	0.364			0.516	0.218	5.726			5.278	0.5191
Q13530	Serine incorporator 3 OS=Homo sapiens OX=9606 GN=SERINC3 PE=2 SV=2	SERINC3	52.58	2.447	3.167	7.239	0.495	0.405	7.262	0.746		0.675	0.835	0.865	0.80636
Q9Y3C8	Ubiquitin-fold modifier-conjugating enzyme 1 OS=Homo sapiens OX=9606 GN=UFC1 PE=1 SV=3	UFC1	19.458	1.972	1.396	0.861			0.66	0.945	1.132			0.647	0.23352
Q4KMQ2	Anoctamin-6 OS=Homo sapiens OX=9606 GN=ANO6 PE=1 SV=2	ANO6	106.16	0.937	0.888	0.981	1.12	1.101	1.252	1.112	1.186	1.567	1.608	1.338	0.0117025
Q92673	Sortilin-related receptor OS=Homo sapiens OX=9606 GN=SORL1 PE=1 SV=2	SORL1	248.42				1.272	0.915				0.94	0.858	0.822	0.39556
P55287	Cadherin-11 OS=Homo sapiens OX=9606 GN=CDH11 PE=1 SV=2	CDH11	87.964	1.599	1.577	1.283			1.02	1.12	0.442			0.579	0.111395
P61224	Ras-related protein Rap-1b OS=Homo sapiens OX=9606 GN=RAP1B PE=1 SV=1	RAP1B	20.825	0.379	1.301	0.57	0.83	0.679	1.449	1.439	1.19	0.766	0.745	1.487	0.119784
Q9Y6E0	Serine/threonine-protein kinase 24 OS=Homo sapiens OX=9606 GN=STK24 PE=1 SV=1	STK24	49.307	0.85	0.76	1.302	1.324	2.592	1.313	0.79	1.085	0.968	0.832	0.731	0.35256
Q16849	Receptor-type tyrosine-protein phosphatase-like N OS=Homo sapiens OX=9606 GN=PTPRN PE=1 SV=1	PTPRN	105.85				0.611	0.652				0.918	0.753	1.323	0.118276
P14174	Macrophage migration inhibitory factor OS=Homo sapiens OX=9606 GN=MIF PE=1 SV=4	MIF	12.476	0.512	0.749	1.827	4.177	4.97	0.447	0.73	1.027	0.618	0.881	0.303	0.13838
Q9NRW1	Ras-related protein Rab-6B OS=Homo sapiens OX=9606 GN=RAB6B PE=1 SV=1	RAB6B	23.461	0.707	1.157	0.862	0.897	1.084	1.238	1.554	0.991	1.686	1.255	1.429	0.024499
Q9NZM1	Myoferlin OS=Homo sapiens OX=9606 GN=MYOF PE=1 SV=1	MYOF	234.71	1.184	0.809	1.176	1.384	0.985	0.992	1.103	1.743	1.248	0.881	1.077	0.68638
P51809	Vesicle-associated membrane protein 7 OS=Homo sapiens OX=9606 GN=VAMP7 PE=1 SV=3	VAMP7	24.935	3.644	1.636	0.44			0.334	0.899	0.397			0.285	0.20842
Q9H7F0	Probable cation-transporting ATPase 13A3 OS=Homo sapiens OX=9606 GN=ATP13A3 PE=1 SV=4	ATP13A3	138.04	3.908	1.721	3.213			2.146	0.354	0.974			0.393	0.123138
Q5SRE7	Phytanoyl-CoA dioxygenase domain-containing protein 1 OS=Homo sapiens OX=9606 GN=PHYHD1 PE=1 SV=2	PHYHD1	32.41				0.789	0.504				0.729	1.274	1.549	0.35778
P04118	Colipase OS=Homo sapiens OX=9606 GN=CLPS PE=1 SV=2	CLPS	11.954	4.057	5.297	1.1			1.509	0.883	0.708			0.297	0.11524
Q9HB21	Pleckstrin homology domain-containing family A member 1 OS=Homo sapiens OX=9606 GN=PLEKHA1 PE=1 SV=2	PLEKHA1	45.553	0.942	2.043	1.842			0.6	0.948	0.91			0.509	0.086277
P10155	60 kDa SS-A/Ro ribonucleoprotein OS=Homo sapiens OX=9606 GN=RO60 PE=1 SV=2	RO60	60.67	0.723	0.865	0.612			0.885	1.364	1.006			1.48	0.077065
Q9BVM4	Gamma-glutamylaminecyclotransferase OS=Homo sapiens OX=9606 GN=GGACT PE=1 SV=2	GGACT	17.328	0.701	0.88	0.813	0.702	0.627	0.794	1.703	1.257	1.094	1.019	1.576	0.0149369
P49418	Amphiphysin OS=Homo sapiens OX=9606 GN=AMPH PE=1 SV=1	AMPH	76.256				0.814	0.791				1.182	1.149	1.452	0.0029008
Q9H444	Charged multivesicular body protein 4b OS=Homo sapiens OX=9606 GN=CHMP4B PE=1 SV=1	CHMP4B	24.95	1.326	0.923	0.971	0.974	1.058	0.917	0.748	1.083	0.939	0.914	0.876	0.172941
Q9HBH0	Rho-related GTP-binding protein RhoF OS=Homo sapiens OX=9606 GN=RHOF PE=1 SV=1	RHOF	23.625	1.383	0.719	1.304	1.093	0.765	0.709	1.015	1.569	0.997	1.026	1.01	0.94702
P98082	Disabled homolog 2 OS=Homo sapiens OX=9606 GN=DAB2 PE=1 SV=3	DAB2	82.447	1.657	1.3	0.998	0.534	0.765	0.521	0.62	0.507	0.608	1.403	0.696	0.21464
Q9H8H3	Methyltransferase-like protein 7A OS=Homo sapiens OX=9606 GN=METTL7A PE=1 SV=1	METTL7A	28.319	0.886	0.835	0.809			1.018	0.332	1.046			0.947	0.68884
Q9BPX5	Actin-related protein 2/3 complex subunit 5-like protein OS=Homo sapiens OX=9606 GN=ARPC5L PE=1 SV=1	ARPC5L	16.941	0.961	1.151	2.245			1.023	0.874	2.409			0.988	0.9129
Q9H190	Syntenin-2 OS=Homo sapiens OX=9606 GN=SDCBP2 PE=1 SV=2	SDCBP2	31.593	0.554	0.531	0.995	4.052	4.798	1.017	0.429	1.675	0.759	0.674	0.417	0.33284
O14964	Hepatocyte growth factor-regulated tyrosine kinase substrate OS=Homo sapiens OX=9606 GN=HGS PE=1 SV=1	HGS	86.191	1.145	0.919	0.93	0.853	0.702	0.972	1.512	1.018	0.94	1.044	1.206	0.154059
O00159	Unconventional myosin-Ic OS=Homo sapiens OX=9606 GN=MYO1C PE=1 SV=4	MYO1C	121.68	1.186	1.807	2.23	0.955	2.417	0.982	0.815	0.931	0.705	0.751	0.487	0.0082046
O14745	Na(+)/H(+) exchange regulatory cofactor NHE-RF1 OS=Homo sapiens OX=9606 GN=SLC9A3R1 PE=1 SV=4	SLC9A3R1	38.868	1.032	0.944	1.611	0.869	1.987	1.025	1.371	0.812	0.896	0.768	0.756	0.23308
P18827	Syndecan-1 OS=Homo sapiens OX=9606 GN=SDC1 PE=1 SV=3	SDC1	32.461	0.948	4.536	0.625	0.952	0.838		1.849	2.451	0.623	0.463	0.852	0.87684
P04733	Metallothionein-1F OS=Homo sapiens OX=9606 GN=MT1F PE=1 SV=1	MT1F	6.0863	8.483	1.151	2.157	3	1.904	0.38	0.948	0.366	0.29	0.283	0.136	0.00161794
Q99447	Ethanolamine-phosphate cytidylyltransferase OS=Homo sapiens OX=9606 GN=PCYT2 PE=1 SV=1	PCYT2	43.835	1.928	1.687	1.178	0.751	0.842	1.555	0.917	1.179	0.593	0.946	0.813	0.46164
P20073	Annexin A7 OS=Homo sapiens OX=9606 GN=ANXA7 PE=1 SV=3	ANXA7	52.739	1.844	0.926	1.767	1.003	1.174	1.298	1.086	0.569	1.085	0.848	0.728	0.158501
P27918	Properdin OS=Homo sapiens OX=9606 GN=CFP PE=1 SV=2	CFP	51.276	0.508	0.508	0.425	1.165	0.265	5.534	0.519	2.482	0.903	1.148	3.687	0.05402
Q9NZN3	EH domain-containing protein 3 OS=Homo sapiens OX=9606 GN=EHD3 PE=1 SV=2	EHD3	60.886	1.141	1.37	0.846			0.521	0.956	1.309			0.83	0.48232
P06870	Kallikrein-1 OS=Homo sapiens OX=9606 GN=KLK1 PE=1 SV=2	KLK1	28.889	1.726	0.693	0.391	0.691	0.225	1.513	1.724	1.959	2.281	0.591	2.165	0.059297
P50443	Sulfate transporter OS=Homo sapiens OX=9606 GN=SLC26A2 PE=1 SV=2	SLC26A2	81.661	0.942	3.311	0.906			1.973	3.116	0.453			1.074	0.99496
Q8IV38	Ankyrin repeat and MYND domain-containing protein 2 OS=Homo sapiens OX=9606 GN=ANKMY2 PE=1 SV=1	ANKMY2	49.298	0.998	1.829	0.765			0.377	0.894	0.974			0.625	0.29202
Q9P2R3	Rabankyrin-5 OS=Homo sapiens OX=9606 GN=ANKFY1 PE=1 SV=2	ANKFY1	128.4	1.683	1.248	1.101			0.594	1.64	1.156			0.841	0.49944
Q6IBS0	Twinfilin-2 OS=Homo sapiens OX=9606 GN=TWF2 PE=1 SV=2	TWF2	39.548	0.788	1.623	0.866			1.505	0.98	1.095			1.092	0.65476
Q9BRT3	Migration and invasion enhancer 1 OS=Homo sapiens OX=9606 GN=MIEN1 PE=1 SV=1	MIEN1	12.403				0.893	0.574				1.259	0.993	1.535	0.2175
Q13591	Semaphorin-5A OS=Homo sapiens OX=9606 GN=SEMA5A PE=1 SV=3	SEMA5A	120.61	0.791	0.584	0.621	0.352	0.96	0.531	2.055	1.425	0.884	1.099	1.812	0.088821
Q93008	Probable ubiquitin carboxyl-terminal hydrolase FAF-X OS=Homo sapiens OX=9606 GN=USP9X PE=1 SV=3	USP9X	292.28	1.245	1.003	0.999			0.953	0.853	1.377			0.98	0.83448
Q8IV08	Phospholipase D3 OS=Homo sapiens OX=9606 GN=PLD3 PE=1 SV=1	PLD3	54.705	0.895	0.901	0.658	0.643	0.508	0.766	1.013	0.609	1.728	1.139	1.458	0.145817
P17050	Alpha-N-acetylgalactosaminidase OS=Homo sapiens OX=9606 GN=NAGA PE=1 SV=2	NAGA	46.564	0.686	0.93	0.947	0.91	0.784	1.727	1.324	1.339	1.215	1.231	1.606	0.00070205
O75083	WD repeat-containing protein 1 OS=Homo sapiens OX=9606 GN=WDR1 PE=1 SV=4	WDR1	66.193	0.941	0.663	1.204	0.917	0.964	1.021	1.043	1.751	1.208	1.062	1.298	0.102084
P01591	Immunoglobulin J chain OS=Homo sapiens OX=9606 GN=JCHAIN PE=1 SV=4	JCHAIN	18.098	0.84	1.298	0.973	0.874	1.536	2.451	0.864	1.411	1.335	0.904	1.262	0.4267
P16083	Ribosyldihydronicotinamide dehydrogenase [quinone] OS=Homo sapiens OX=9606 GN=NQO2 PE=1 SV=5	NQO2	25.918	2.175	1.52	0.848	0.91	0.787	1.172	1.342	1.507	0.635	1.365	0.965	0.9858
P00338	L-lactate dehydrogenase A chain OS=Homo sapiens OX=9606 GN=LDHA PE=1 SV=2	LDHA	36.688	0.799	1.327	1.323	4.374	4.026	1.172	0.474	0.419	0.338	0.512	0.246	0.0121588
P11169	"Solute carrier family 2, facilitated glucose transporter member 3 OS=Homo sapiens OX=9606 GN=SLC2A3 PE=1 SV=1"	SLC2A3	53.924				4.028	0.894				1.175	1.054	0.453	0.55274
Q96AT9	Ribulose-phosphate 3-epimerase OS=Homo sapiens OX=9606 GN=RPE PE=1 SV=1	RPE	24.927	1.31	0.61	1.109	1.316	1.111	1.452	0.599	0.489	0.376	0.662	0.656	0.098184
O75340	Programmed cell death protein 6 OS=Homo sapiens OX=9606 GN=PDCD6 PE=1 SV=1	PDCD6	21.868	1.783	1.224	2.475			0.617	0.477	0.533			0.297	0.0055218
Q9H0T7	Ras-related protein Rab-17 OS=Homo sapiens OX=9606 GN=RAB17 PE=1 SV=2	RAB17	23.491	0.22	0.336	0.552	0.71	0.772	0.518	1.232	0.744	1.151	1.265	1.896	0.048556
P49773	Histidine triad nucleotide-binding protein 1 OS=Homo sapiens OX=9606 GN=HINT1 PE=1 SV=2	HINT1	13.802				0.807	1.068				1.001	1.154	1.149	0.44974
P42685	Tyrosine-protein kinase FRK OS=Homo sapiens OX=9606 GN=FRK PE=1 SV=1	FRK	58.253	1.706	0.511	1.391	1.19	1.43	1.192	0.958	1.02	1.044	0.974	0.833	0.63344
Q92845	Kinesin-associated protein 3 OS=Homo sapiens OX=9606 GN=KIFAP3 PE=1 SV=2	KIFAP3	91.204				0.495	0.542				1.126	1.371	2.408	0.0149998
Q9Y666	Solute carrier family 12 member 7 OS=Homo sapiens OX=9606 GN=SLC12A7 PE=1 SV=3	SLC12A7	119.1	1.227	1.374	0.988	0.926	0.48	0.822	1.712	0.399	1.179	0.813	0.986	0.83848
P08183	ATP-dependent translocase ABCB1 OS=Homo sapiens OX=9606 GN=ABCB1 PE=1 SV=3	ABCB1	141.48	1.466	0.757	0.951	1.156	0.772	1.079	1.185	0.805	0.884	1.185	1.007	0.85958
P01344	Insulin-like growth factor II OS=Homo sapiens OX=9606 GN=IGF2 PE=1 SV=1	IGF2	20.14	1.134	4.056	1.456			0.622	1.206	0.428			0.339	0.109575
O15240	Neurosecretory protein VGF OS=Homo sapiens OX=9606 GN=VGF PE=1 SV=2	VGF	67.257	1.821	1.339	1.645	1.871	0.883	1.122	0.7	0.609	0.481	0.405	0.439	0.0050989
P06702	Protein S100-A9 OS=Homo sapiens OX=9606 GN=S100A9 PE=1 SV=1	S100A9	13.242	0.941	1.371	1.07	2.85	0.243	8.778	0.701	0.43	0.681	0.346	1.689	0.9067
P35858	Insulin-like growth factor-binding protein complex acid labile subunit OS=Homo sapiens OX=9606 GN=IGFALS PE=1 SV=1	IGFALS	66.034	1.205	0.691	0.573			0.498	0.895	4.016			2.191	0.5411
Q9NV70	Exocyst complex component 1 OS=Homo sapiens OX=9606 GN=EXOC1 PE=1 SV=4	EXOC1	101.98	0.571	1.037	0.264	1.008	1.062	1.206	1.693	1.201	0.917	0.621	1.43	0.2177
P54652	Heat shock-related 70 kDa protein 2 OS=Homo sapiens OX=9606 GN=HSPA2 PE=1 SV=1	HSPA2	70.02	2.325	1.337	1.486	1.079	0.836	0.88	1.074	1.269	0.911	0.848	0.705	0.145784
Q9BXP2	Solute carrier family 12 member 9 OS=Homo sapiens OX=9606 GN=SLC12A9 PE=1 SV=1	SLC12A9	96.109	0.388	0.559	0.511				0.317				0.652
P07602	Prosaposin OS=Homo sapiens OX=9606 GN=PSAP PE=1 SV=2	PSAP	58.112	0.536	0.649	0.413	0.566	0.651	0.956	1.229	1.13	2.03	1.414	2.401	0.00049652
P07355	Annexin A2 OS=Homo sapiens OX=9606 GN=ANXA2 PE=1 SV=2	ANXA2	38.604	0.822	0.944	1.17	1.027	1.87	1.16	1.167	1.103	1.04	0.777	0.9	0.65724
Q12805	EGF-containing fibulin-like extracellular matrix protein 1 OS=Homo sapiens OX=9606 GN=EFEMP1 PE=1 SV=2	EFEMP1	54.64	1.164	1.401	1.493	1.078	0.779	0.943	1.162	1.188	1.588	1.073	1.007	0.91228
Q15722	Leukotriene B4 receptor 1 OS=Homo sapiens OX=9606 GN=LTB4R PE=1 SV=2	LTB4R	37.557	0.407	2.076	0.5			2.363	0.413	0.705			1.167	0.83402
O14818	Proteasome subunit alpha type-7 OS=Homo sapiens OX=9606 GN=PSMA7 PE=1 SV=1	PSMA7	27.887	1.567	1.764	0.93	1.123	0.599	1.629	1.022	1.4	0.953	1.064	1.014	0.78222
P10321	"HLA class I histocompatibility antigen, C alpha chain OS=Homo sapiens OX=9606 GN=HLA-C PE=1 SV=3"	HLA-C	40.648				0.952	0.489				1.057	3.453	3.13	0.26878
Q5R3I4	Tetratricopeptide repeat protein 38 OS=Homo sapiens OX=9606 GN=TTC38 PE=1 SV=1	TTC38	52.787				2.167	1.363				0.778	1.106	0.534	0.16822
P00747	Plasminogen OS=Homo sapiens OX=9606 GN=PLG PE=1 SV=2	PLG	90.568	1.022	1.74	0.585	0.707	0.736	0.653	0.818	2.665	0.934	1.766	1.427	0.39144
P11274	Breakpoint cluster region protein OS=Homo sapiens OX=9606 GN=BCR PE=1 SV=2	BCR	142.82	1.535	1.287	2.138	1.241	2.718	1.864	0.574	1.075	1.042	0.931	0.615	0.067838
Q13200	26S proteasome non-ATPase regulatory subunit 2 OS=Homo sapiens OX=9606 GN=PSMD2 PE=1 SV=3	PSMD2	100.2				0.888	0.782				0.585	1.688	1.361	0.77284
Q8WUH2	Transforming growth factor-beta receptor-associated protein 1 OS=Homo sapiens OX=9606 GN=TGFBRAP1 PE=1 SV=1	TGFBRAP1	97.157				0.983	0.615				1.666	0.781	1.531	0.4803
P52209	"6-phosphogluconate dehydrogenase, decarboxylating OS=Homo sapiens OX=9606 GN=PGD PE=1 SV=3"	PGD	53.139	0.872	1.423	0.585	1.208	1.762	1.504	0.965	1.371	1.248	1.106	1.059	0.59666
Q8WZ73	E3 ubiquitin-protein ligase rififylin OS=Homo sapiens OX=9606 GN=RFFL PE=1 SV=1	RFFL	40.514	1.748	3.392	1.805			1.828	1.335	1.434			0.662	0.189302
P22792	Carboxypeptidase N subunit 2 OS=Homo sapiens OX=9606 GN=CPN2 PE=1 SV=3	CPN2	60.556	2.3	0.788	0.428	0.314	0.265	0.193	1.08	3.466	1.244	1.03	1.713	0.4061
Q13464	Rho-associated protein kinase 1 OS=Homo sapiens OX=9606 GN=ROCK1 PE=1 SV=1	ROCK1	158.17	0.701	2.058	0.611	1.732	1.508	1.914	1.335	0.862	1.068	1.133	0.955	0.9195
Q6IQ22	Ras-related protein Rab-12 OS=Homo sapiens OX=9606 GN=RAB12 PE=1 SV=3	RAB12	27.248	1.677	0.523	1.019	0.884	1.19	0.779	1.084	0.855	1.033	1.131	0.922	0.91812
Q92887	Canalicular multispecific organic anion transporter 1 OS=Homo sapiens OX=9606 GN=ABCC2 PE=1 SV=3	ABCC2	174.21				1.045	1.034				1.39	0.931	1.116	0.7309
P35228	"Nitric oxide synthase, inducible OS=Homo sapiens OX=9606 GN=NOS2 PE=1 SV=2"	NOS2	131.12	0.21	0.643	0.475	5.32	3.874	0.805	0.212	0.83	1.03	1.048	0.373	0.55048
Q03591	Complement factor H-related protein 1 OS=Homo sapiens OX=9606 GN=CFHR1 PE=1 SV=2	CFHR1	37.65	0.974	1.08	0.61	0.531	0.894	1.264	1.665	2.414	2.585	1.376	2.275	0.0035391
Q96LB3	Intraflagellar transport protein 74 homolog OS=Homo sapiens OX=9606 GN=IFT74 PE=1 SV=1	IFT74	69.239	1.055	1.138	0.964			0.793	1.262	0.954			0.953	0.67758
P15941	Mucin-1 OS=Homo sapiens OX=9606 GN=MUC1 PE=1 SV=3	MUC1	122.1	0.779	0.941	1.642	1.367	1.914	0.685	0.613	1.033	1.141	0.7	0.628	0.067382
Q969X1	Protein lifeguard 3 OS=Homo sapiens OX=9606 GN=TMBIM1 PE=1 SV=2	TMBIM1	34.607	2.214	1.451	1.093	0.611	0.834	0.704	1.598	1.199	1.146	1	0.91	0.9129
O75954	Tetraspanin-9 OS=Homo sapiens OX=9606 GN=TSPAN9 PE=1 SV=1	TSPAN9	26.779	0.865		0.513	0.126	0.414	1.513	1.614	0.497	0.724	0.529	2.034	0.129344
A0A0B4J1V2	Immunoglobulin heavy variable 2-26 OS=Homo sapiens OX=9606 GN=IGHV2-26 PE=3 SV=1	IGHV2-26	13.182	0.389	1.548	0.537			5.503	0.512	0.655			2.696	0.53736
Q8IX04	Ubiquitin-conjugating enzyme E2 variant 3 OS=Homo sapiens OX=9606 GN=UEVLD PE=1 SV=2	UEVLD	52.263	2.043	0.859	1.662	0.537	0.892	0.901	1.098	1.172	0.681	1.013	0.812	0.67916
P46781	40S ribosomal protein S9 OS=Homo sapiens OX=9606 GN=RPS9 PE=1 SV=3	RPS9	22.591	2.176	0.801	0.558			0.521	0.88	1.205			0.737	0.71162
Q9H9S4	Calcium-binding protein 39-like OS=Homo sapiens OX=9606 GN=CAB39L PE=1 SV=3	CAB39L	39.087	0.601	1.295	0.795	0.713	1.335	2.499	1.6	1.646	1.549	0.923	1.734	0.039796
A4D1S5	Ras-related protein Rab-19 OS=Homo sapiens OX=9606 GN=RAB19 PE=2 SV=2	RAB19	24.4	1.126	0.686	0.83			0.618	0.917	1.029			0.97	0.88838
O00468	Agrin OS=Homo sapiens OX=9606 GN=AGRN PE=1 SV=6	AGRN	217.32	0.813	1.872	0.744	0.605	0.61	0.9	1.388	2.349	1.495	0.869	1.508	0.149641
P05387	60S acidic ribosomal protein P2 OS=Homo sapiens OX=9606 GN=RPLP2 PE=1 SV=1	RPLP2	11.665	0.603	4.97	0.606			0.692	0.644	1.084			0.392	0.57342
P80188	Neutrophil gelatinase-associated lipocalin OS=Homo sapiens OX=9606 GN=LCN2 PE=1 SV=2	LCN2	22.588	0.697	2.338	1.394	1.024	0.279	5.062	0.417	0.23	1.761	0.5	1.39	0.90274
P02679	Fibrinogen gamma chain OS=Homo sapiens OX=9606 GN=FGG PE=1 SV=3	FGG	51.511	0.567	0.61	0.308	0.502	0.263	0.991	0.358	5.751	0.775	2.05	4.411	0.061122
O95183	Vesicle-associated membrane protein 5 OS=Homo sapiens OX=9606 GN=VAMP5 PE=1 SV=1	VAMP5	12.805	1.133	1.224	0.864	1.469	1.194	1.671	0.594	0.351	0.715	1.092	0.752	0.2169
Q96RF0	Sorting nexin-18 OS=Homo sapiens OX=9606 GN=SNX18 PE=1 SV=2	SNX18	68.894	1.095	1.056	0.97	0.78	1.692	1.533	0.961	1.507	0.772	1.088	1.048	0.80694
Q9NTX5	Ethylmalonyl-CoA decarboxylase OS=Homo sapiens OX=9606 GN=ECHDC1 PE=1 SV=2	ECHDC1	33.698	1.231	1.217	1.001			0.582	1.502	1.115			0.928	0.64402
P28907	ADP-ribosyl cyclase/cyclic ADP-ribose hydrolase 1 OS=Homo sapiens OX=9606 GN=CD38 PE=1 SV=2	CD38	34.328	0.987	1.21	0.486			1.444	2.691	0.462			1.713	0.5552
Q9Y3C0	WASH complex subunit 3 OS=Homo sapiens OX=9606 GN=WASHC3 PE=1 SV=1	WASHC3	21.172	0.711	0.573	0.73			1.023	1.123	0.832			1.479	0.029364
Q9Y3A5	Ribosome maturation protein SBDS OS=Homo sapiens OX=9606 GN=SBDS PE=1 SV=4	SBDS	28.763	1	1.46	0.83	0.547	0.542	1.5	0.568	0.301	1.089	1.767	1.193	0.87096
Q5VWT5	FYN-binding protein 2 OS=Homo sapiens OX=9606 GN=FYB2 PE=1 SV=1	FYB2	82.069	1.345	0.996	1.019			0.762	1.076	0.977			0.838	0.27618
Q9GIY3	"HLA class II histocompatibility antigen, DRB1-14 beta chain OS=Homo sapiens OX=9606 GN=HLA-DRB1 PE=1 SV=1"	HLA-DRB1	30.139	1.745	1.202	0.951			0.392	1.584	0.486			0.632	0.25038
Q14847	LIM and SH3 domain protein 1 OS=Homo sapiens OX=9606 GN=LASP1 PE=1 SV=2	LASP1	29.717	1.738	1.516	1.657	1.316	2.29	1.243	0.726	0.952	1.022	0.589	0.532	0.0037377
P01861	Immunoglobulin heavy constant gamma 4 OS=Homo sapiens OX=9606 GN=IGHG4 PE=1 SV=1	IGHG4	35.94	0.803	1.33	0.992	1.639	0.575	20.588	1.564	1.691	0.732	0.619	4.719	0.3828
P31948	Stress-induced-phosphoprotein 1 OS=Homo sapiens OX=9606 GN=STIP1 PE=1 SV=1	STIP1	62.639				0.898	0.947				0.989	1.415	1.303	0.30276
P61081	NEDD8-conjugating enzyme Ubc12 OS=Homo sapiens OX=9606 GN=UBE2M PE=1 SV=1	UBE2M	20.9	1.077	1.862	0.923			1.147	1.321	0.924			0.878	0.7145
O95825	Quinone oxidoreductase-like protein 1 OS=Homo sapiens OX=9606 GN=CRYZL1 PE=1 SV=2	CRYZL1	38.696	0.543	1.015	0.54			0.592	1.772	1.424			1.806	0.24512
P35240	Merlin OS=Homo sapiens OX=9606 GN=NF2 PE=1 SV=1	NF2	69.689	1.065	2.071	1.58	1.215	3.14	1.349	0.812	1.159	1.466	1.528	0.696	0.2079
Q9H4A6	Golgi phosphoprotein 3 OS=Homo sapiens OX=9606 GN=GOLPH3 PE=1 SV=1	GOLPH3	33.81	1.947	3.893	1.398			1.233	0.87	0.59			0.372	0.063723
Q13501	Sequestosome-1 OS=Homo sapiens OX=9606 GN=SQSTM1 PE=1 SV=1	SQSTM1	47.687	1.079	3.471	1.252			0.977	0.752	0.894			0.452	0.155663
P18669	Phosphoglycerate mutase 1 OS=Homo sapiens OX=9606 GN=PGAM1 PE=1 SV=2	PGAM1	28.804	1.289	1.194	1.091	0.905	1.151	0.857	0.891	1.49	0.733	0.975	0.879	0.28368
P47756	F-actin-capping protein subunit beta OS=Homo sapiens OX=9606 GN=CAPZB PE=1 SV=4	CAPZB	31.35	1.05	1.075	0.929	0.833	1.002	1.221	1.16	1.344	1.209	1.483	1.313	0.0028028
Q6UX65	DNA damage-regulated autophagy modulator protein 2 OS=Homo sapiens OX=9606 GN=DRAM2 PE=1 SV=1	DRAM2	29.766				1.329	0.768				0.76	0.786	0.737	0.43238
Q4KMG9	Transmembrane protein 52B OS=Homo sapiens OX=9606 GN=TMEM52B PE=2 SV=1	TMEM52B	20.002				1.041	0.639				1.316	0.523	1.095	0.97692
O95279	Potassium channel subfamily K member 5 OS=Homo sapiens OX=9606 GN=KCNK5 PE=1 SV=1	KCNK5	55.129	0.441	0.495	1.53			0.636	0.748	1.002			0.968	0.79098
P46779	60S ribosomal protein L28 OS=Homo sapiens OX=9606 GN=RPL28 PE=1 SV=3	RPL28	15.747				0.319	0.174				0.715	0.701	2.872	0.1712
Q06210	Glutamine--fructose-6-phosphate aminotransferase [isomerizing] 1 OS=Homo sapiens OX=9606 GN=GFPT1 PE=1 SV=3	GFPT1	78.806	1.811	4.536	1.094	0.741	1.276	1.264	1.301	1.296	1.077	1.077	0.636	0.47
P54793	Arylsulfatase F OS=Homo sapiens OX=9606 GN=ARSF PE=1 SV=4	ARSF	65.939	1.131	1.188	1.145	1.546	1.044	1.293	0.62	0.706	1.144	0.966	0.781	0.113078
Q5IJ48	Protein crumbs homolog 2 OS=Homo sapiens OX=9606 GN=CRB2 PE=1 SV=2	CRB2	134.26	2.247	2.102	1.205			1.595	0.821	0.835			0.585	0.1354
Q8N6F7	Germinal center-associated signaling and motility protein OS=Homo sapiens OX=9606 GN=GCSAM PE=1 SV=1	GCSAM	21.005	1.171	17.401	0.811				0.57	0.296			0.067	0.24678
Q6PHR2	Serine/threonine-protein kinase ULK3 OS=Homo sapiens OX=9606 GN=ULK3 PE=1 SV=2	ULK3	53.444	1.093	0.823	1.941			1.596	0.665	1.069			0.863	0.70818
Q9Y4D1	Disheveled-associated activator of morphogenesis 1 OS=Homo sapiens OX=9606 GN=DAAM1 PE=1 SV=2	DAAM1	123.47	1.106	1.637	1.811	2.104	3.383	1.9	0.318	1.046	0.209	0.439	0.39	0.026298
P12724	Eosinophil cationic protein OS=Homo sapiens OX=9606 GN=RNASE3 PE=1 SV=2	RNASE3	18.385				5.127	1.366				0.222	0.521	0.114	0.120982
Q96FF7	Uncharacterized protein MISP3 OS=Homo sapiens OX=9606 GN=MISP3 PE=2 SV=4	MISP3	24.028				1.49	1.095				1.617	1.496	1.204	0.34082
P15880	40S ribosomal protein S2 OS=Homo sapiens OX=9606 GN=RPS2 PE=1 SV=2	RPS2	31.324				0.731	0.783				0.882	1.509	1.579	0.2594
P14555	"Phospholipase A2, membrane associated OS=Homo sapiens OX=9606 GN=PLA2G2A PE=1 SV=2"	PLA2G2A	16.083				0.919	0.684				0.234	0.311	0.34	0.034319
Q14767	Latent-transforming growth factor beta-binding protein 2 OS=Homo sapiens OX=9606 GN=LTBP2 PE=1 SV=3	LTBP2	195.05				1.526	1.13				0.794	0.379	0.442	0.160275
Q9Y485	DmX-like protein 1 OS=Homo sapiens OX=9606 GN=DMXL1 PE=1 SV=3	DMXL1	337.83				0.927	0.65				0.337	0.461	0.506	0.103436
Q9BXA5	Succinate receptor 1 OS=Homo sapiens OX=9606 GN=SUCNR1 PE=1 SV=2	SUCNR1	38.697	1.272	0.566	3.532			0.645	0.487	0.462			0.297	0.151739
Q8N8N7	Prostaglandin reductase 2 OS=Homo sapiens OX=9606 GN=PTGR2 PE=1 SV=1	PTGR2	38.499	1.314	1.166	1.015	0.798	1.017	0.655	0.965	0.754	1.399	1.298	0.955	0.6682
Q9UN70	Protocadherin gamma-C3 OS=Homo sapiens OX=9606 GN=PCDHGC3 PE=1 SV=1	PCDHGC3	101.08	1.844	1.324	0.711			1.118	1.064	1.878			1.047	0.81322
P08311	Cathepsin G OS=Homo sapiens OX=9606 GN=CTSG PE=1 SV=2	CTSG	28.837	0.16	1.93	0.136	3.597	0.657	3.109	0.403	1.132	1.112	1.568	1.13	0.40482
O75534	Cold shock domain-containing protein E1 OS=Homo sapiens OX=9606 GN=CSDE1 PE=1 SV=2	CSDE1	88.884	1.73	3.967	1.58			0.866	1.202	1.06			0.43	0.068775
P51397	Death-associated protein 1 OS=Homo sapiens OX=9606 GN=DAP PE=1 SV=3	DAP	11.164	4.596	1.064	4.913			1.573	0.25				0.259	0.20318
Q9NUM4	Transmembrane protein 106B OS=Homo sapiens OX=9606 GN=TMEM106B PE=1 SV=2	TMEM106B	31.127	1.328	2.145	1.115	1.42	1.631	1.102	0.945	0.612	1.531	1.955	0.804	0.27086
Q8NCR9	Clarin-3 OS=Homo sapiens OX=9606 GN=CLRN3 PE=2 SV=1	CLRN3	25.321	1.251	0.604	0.491			0.645	0.483	1.154			0.973	0.97942
Q9BUL8	Programmed cell death protein 10 OS=Homo sapiens OX=9606 GN=PDCD10 PE=1 SV=1	PDCD10	24.701	1.22	1.003	1.377	0.986	1.928	1.709	0.959	1.113	1.106	0.913	0.89	0.52196
P05109	Protein S100-A8 OS=Homo sapiens OX=9606 GN=S100A8 PE=1 SV=1	S100A8	10.834	0.227	0.942	0.222	3.138	0.553	9.133	0.516	0.421	0.706	0.506	2.22	0.58616
P82980	Retinol-binding protein 5 OS=Homo sapiens OX=9606 GN=RBP5 PE=1 SV=3	RBP5	15.931	1.943	2.139	1.26	0.876	0.547	1.08	2.48	0.598	0.91	1.234	0.932	0.85124
Q07075	Glutamyl aminopeptidase OS=Homo sapiens OX=9606 GN=ENPEP PE=1 SV=3	ENPEP	109.24	0.674	0.715	0.705	0.7	0.856	0.587	1.54	0.732	1.027	2.543	1.761	0.183036
P05062	Fructose-bisphosphate aldolase B OS=Homo sapiens OX=9606 GN=ALDOB PE=1 SV=2	ALDOB	39.473	1.185	0.899	1.169	1.011	0.826	0.64	0.8	0.899	0.75	1.457	0.893	0.381
P55011	Solute carrier family 12 member 2 OS=Homo sapiens OX=9606 GN=SLC12A2 PE=1 SV=1	SLC12A2	131.45	1.568	3.093	1.052			0.809	0.995	1.072			0.503	0.143244
P30536	Translocator protein OS=Homo sapiens OX=9606 GN=TSPO PE=1 SV=3	TSPO	18.828	0.716	0.797	0.473	1.779	0.578	8.247	0.822	0.684	1.329	1.366	2.866	0.20664
P17066	Heat shock 70 kDa protein 6 OS=Homo sapiens OX=9606 GN=HSPA6 PE=1 SV=2	HSPA6	71.027	1.144	0.978	0.814	0.97	0.978	1.328	1.377	1.144	0.88	1.156	1.205	0.095642
P20472	Parvalbumin alpha OS=Homo sapiens OX=9606 GN=PVALB PE=1 SV=2	PVALB	12.059	1.095	1.468	1.365			1.109	1.355	1.709			1.062	0.74884
P10619	Lysosomal protective protein OS=Homo sapiens OX=9606 GN=CTSA PE=1 SV=2	CTSA	54.465	0.62	0.521	1.236	0.398	1.191	0.902	0.368	1.326	2.345	0.729	1.43	0.49084
Q3YBM2	Transmembrane protein 176B OS=Homo sapiens OX=9606 GN=TMEM176B PE=1 SV=2	TMEM176B	29.056	0.871	1.128	0.706	0.867	0.951	0.889	1.139	0.615	0.898	1.86	1.194	0.56116
P05107	Integrin beta-2 OS=Homo sapiens OX=9606 GN=ITGB2 PE=1 SV=2	ITGB2	84.781	0.433	0.388	0.266	4.51	0.515	5.612	0.446	0.394	1.35	0.993	1.439	0.48366
Q969Z4	Tumor necrosis factor receptor superfamily member 19L OS=Homo sapiens OX=9606 GN=RELT PE=1 SV=1	RELT	46.091				0.708	0.729				0.522	0.249	0.537	0.20372
P13489	Ribonuclease inhibitor OS=Homo sapiens OX=9606 GN=RNH1 PE=1 SV=2	RNH1	49.973	0.596	1.668	0.827	0.906	0.906	1.035	1.591	0.991	1.068	1.182	1.197	0.2667
Q8N1G4	Leucine-rich repeat-containing protein 47 OS=Homo sapiens OX=9606 GN=LRRC47 PE=1 SV=1	LRRC47	63.472	1.092	2.672	0.755	0.841	0.644	0.658	1.055	1.366	0.561	0.707	0.724	0.46464
Q9BV40	Vesicle-associated membrane protein 8 OS=Homo sapiens OX=9606 GN=VAMP8 PE=1 SV=1	VAMP8	11.438	0.88	0.936	0.976	1.033	1.204	0.918	1.571	0.806	0.978	1.11	1.07	0.72044
Q6UWP2	Dehydrogenase/reductase SDR family member 11 OS=Homo sapiens OX=9606 GN=DHRS11 PE=1 SV=1	DHRS11	28.308				1.043	0.846				0.862	1.146	1.063	0.77966
Q6ZMI0	Protein phosphatase 1 regulatory subunit 21 OS=Homo sapiens OX=9606 GN=PPP1R21 PE=1 SV=1	PPP1R21	88.313	0.884	0.67	0.524	0.816	0.42	0.677	1.498	1.144	1.651	0.66	1.699	0.070759
P61073	C-X-C chemokine receptor type 4 OS=Homo sapiens OX=9606 GN=CXCR4 PE=1 SV=1	CXCR4	39.745	1.532	1.505	1.319			4.602	0.623	0.689			1.358	0.84592
Q14117	Dihydropyrimidinase OS=Homo sapiens OX=9606 GN=DPYS PE=1 SV=1	DPYS	56.629	1.882	0.493	0.855			1.085	0.436	0.28			0.558	0.34434
P52790	Hexokinase-3 OS=Homo sapiens OX=9606 GN=HK3 PE=1 SV=2	HK3	99.024				1.787	0.595				1.159	1.426	1.085	0.73154
P08473	Neprilysin OS=Homo sapiens OX=9606 GN=MME PE=1 SV=2	MME	85.513	1.428	0.85	1.081	0.901	0.851	0.639	1.445	0.919	1.179	1.337	1.08	0.7572
P54803	Galactocerebrosidase OS=Homo sapiens OX=9606 GN=GALC PE=1 SV=3	GALC	77.063	1.304	1.393	0.511	0.602	1.499	1.268	1.31	1.073	1.497	1.613	1.273	0.24324
Q68D51	DENN domain-containing protein 2C OS=Homo sapiens OX=9606 GN=DENND2C PE=1 SV=2	DENND2C	106.86	1.212	0.485	0.298			0.204		9.918			7.611	0.58778
P14618	Pyruvate kinase PKM OS=Homo sapiens OX=9606 GN=PKM PE=1 SV=4	PKM	57.936	1.101	1.059	0.996	0.909	1.317	1.01	0.952	1.437	0.972	1.029	1.003	0.99052
A0A0U1RR37	Uncharacterized protein C1orf232 OS=Homo sapiens OX=9606 GN=C1orf232 PE=4 SV=1	C1orf232	20.28				0.718	0.565				0.152	6.054	4.837	0.84504
Q9NUP9	Protein lin-7 homolog C OS=Homo sapiens OX=9606 GN=LIN7C PE=1 SV=1	LIN7C	21.834	1.244	1.794	1.309	1.301	1.876	0.932	0.683	1.168	1.316	1.358	0.725	0.062442
Q9UNZ2	NSFL1 cofactor p47 OS=Homo sapiens OX=9606 GN=NSFL1C PE=1 SV=2	NSFL1C	40.572	1.392	0.761	0.837			0.885	0.879	0.935			0.903	0.7596
Q7L5L3	Lysophospholipase D GDPD3 OS=Homo sapiens OX=9606 GN=GDPD3 PE=2 SV=3	GDPD3	36.596	1.258	2.075	1.124			1.491	1.331	1.116			0.884	0.67324
P08572	Collagen alpha-2(IV) chain OS=Homo sapiens OX=9606 GN=COL4A2 PE=1 SV=4	COL4A2	167.55				0.799	0.705				0.809	1.008	1.208	0.28124
O95398	Rap guanine nucleotide exchange factor 3 OS=Homo sapiens OX=9606 GN=RAPGEF3 PE=1 SV=6	RAPGEF3	103.75	2	0.957	1.773	0.678	0.927	0.8	0.849	0.939	0.922	0.77	0.676	0.21404
Q9UEF7	Klotho OS=Homo sapiens OX=9606 GN=KL PE=1 SV=2	KL	116.18	0.897	0.965	0.674			0.623	1.316	2.282			1.664	0.37764
Q9UNK0	Syntaxin-8 OS=Homo sapiens OX=9606 GN=STX8 PE=1 SV=2	STX8	26.906	0.756	1.156	0.882	0.971	0.934	0.939	0.914	0.79	0.883	1.708	1.114	0.63112
Q9HD42	Charged multivesicular body protein 1a OS=Homo sapiens OX=9606 GN=CHMP1A PE=1 SV=1	CHMP1A	21.703	1.293	0.721	1.063	0.748	1.016	0.965	1.132	1.139	0.899	1.29	1.121	0.33968
P26639	"Threonine--tRNA ligase 1, cytoplasmic OS=Homo sapiens OX=9606 GN=TARS1 PE=1 SV=3"	TARS1	83.434	1.005	2.594	0.896			1.159	1.181	2.199			1.01	0.84188
P22105	Tenascin-X OS=Homo sapiens OX=9606 GN=TNXB PE=1 SV=5	TNXB	458.38	1.693	2.893	1.864	1.666	1.176	1.736	0.729	0.723	0.76	0.647	0.495	0.0127205
Q8NFJ5	Retinoic acid-induced protein 3 OS=Homo sapiens OX=9606 GN=GPRC5A PE=1 SV=2	GPRC5A	40.251	0.967	0.467	1.037			1.687	0.777	1.624			1.654	0.23224
Q6W4X9	Mucin-6 OS=Homo sapiens OX=9606 GN=MUC6 PE=1 SV=3	MUC6	257.05	1.755	15.46	1.571			1.42	0.928	0.707			0.163	0.17394
P25116	Proteinase-activated receptor 1 OS=Homo sapiens OX=9606 GN=F2R PE=1 SV=2	F2R	47.44	1.017	1.058	0.793			0.813	1.988	1.138			1.373	0.40598
Q70IA6	MOB kinase activator 2 OS=Homo sapiens OX=9606 GN=MOB2 PE=1 SV=1	MOB2	26.926	0.882	0.593	0.812			0.893	1.028	0.906			1.236	0.157276
Q9H0E2	Toll-interacting protein OS=Homo sapiens OX=9606 GN=TOLLIP PE=1 SV=1	TOLLIP	30.281	1.202	1.34	0.905	1.196	1.08	1.682	0.614	0.292	0.732	0.855	0.73	0.187304
P06681	Complement C2 OS=Homo sapiens OX=9606 GN=C2 PE=1 SV=2	C2	83.267	0.826	1.15	0.704			1.118	0.653	4.336			2.279	0.42318
P04424	Argininosuccinate lyase OS=Homo sapiens OX=9606 GN=ASL PE=1 SV=4	ASL	51.657	1.761	0.554	0.759	0.569	1.141	0.759	0.592	0.631	0.581	1.335	0.815	0.578
P59998	Actin-related protein 2/3 complex subunit 4 OS=Homo sapiens OX=9606 GN=ARPC4 PE=1 SV=3	ARPC4	19.667	0.967	0.592	1.481			0.545	0.707	1.486			0.901	0.76036
O14980	Exportin-1 OS=Homo sapiens OX=9606 GN=XPO1 PE=1 SV=1	XPO1	123.38				1.098	0.856				1.194	0.87	1.056	0.827
Q9Y265	RuvB-like 1 OS=Homo sapiens OX=9606 GN=RUVBL1 PE=1 SV=1	RUVBL1	50.227	1.693	1.075	1.322	0.902	1.201	1.141	1.005	1.065	0.544	0.882	0.749	0.115461
P07902	Galactose-1-phosphate uridylyltransferase OS=Homo sapiens OX=9606 GN=GALT PE=1 SV=3	GALT	43.363	0.999	1.356	0.493			0.849	1.321	1.163			1.17	0.53266
P55259	Pancreatic secretory granule membrane major glycoprotein GP2 OS=Homo sapiens OX=9606 GN=GP2 PE=2 SV=3	GP2	59.48	0.834	2.287	0.33	1.045	1.083	0.62	3.136	0.456	1.01	0.821	1.083	0.98922
Q15056	Eukaryotic translation initiation factor 4H OS=Homo sapiens OX=9606 GN=EIF4H PE=1 SV=5	EIF4H	27.385				0.87	1.125				1.139	1.326	1.236	0.28348
Q6NY19	KN motif and ankyrin repeat domain-containing protein 3 OS=Homo sapiens OX=9606 GN=KANK3 PE=1 SV=1	KANK3	88.424				0.758	0.883				0.113	1.062	0.716	0.52406
Q14739	Delta(14)-sterol reductase LBR OS=Homo sapiens OX=9606 GN=LBR PE=1 SV=2	LBR	70.702				1.251	0.521				1.028	2.238	1.843	0.39428
O00244	Copper transport protein ATOX1 OS=Homo sapiens OX=9606 GN=ATOX1 PE=1 SV=1	ATOX1	7.4016	0.944	0.893	0.725			0.98	1.028	0.771			1.085	0.5416
Q9BY67	Cell adhesion molecule 1 OS=Homo sapiens OX=9606 GN=CADM1 PE=1 SV=2	CADM1	48.509	0.424	1.746	0.551	0.475	0.503	0.357	1.042	1.112	1.123	0.796	1.198	0.45292
P98088	Mucin-5AC OS=Homo sapiens OX=9606 GN=MUC5AC PE=1 SV=4	MUC5AC	585.56	0.796	0.64	0.511	0.936	0.522	6.898	0.949	1.389	0.809	0.938	3.226	0.125677
Q9ULC3	Ras-related protein Rab-23 OS=Homo sapiens OX=9606 GN=RAB23 PE=1 SV=1	RAB23	26.659	0.903	2.393	0.652			1.582	1.313	0.944			0.972	0.80546
Q9NVJ2	ADP-ribosylation factor-like protein 8B OS=Homo sapiens OX=9606 GN=ARL8B PE=1 SV=1	ARL8B	21.539	1.338	1.392	1.102	1.073	1.591	0.898	1.316	0.924	0.864	2.097	0.939	0.55242
Q6NUT3	Major facilitator superfamily domain-containing protein 12 OS=Homo sapiens OX=9606 GN=MFSD12 PE=1 SV=2	MFSD12	52.075	0.149	0.234	0.278			0.702	1.512	0.792			4.548	0.007917
O43520	Phospholipid-transporting ATPase IC OS=Homo sapiens OX=9606 GN=ATP8B1 PE=1 SV=3	ATP8B1	143.69	0.903	0.926	1.546	0.932	1.907	0.868	0.921	1.372	1.126	1.005	0.852	0.5044
Q9UDY2	Tight junction protein ZO-2 OS=Homo sapiens OX=9606 GN=TJP2 PE=1 SV=2	TJP2	133.96				1.146	2.159				1.122	1.233	0.713	0.45978
P51178	"1-phosphatidylinositol 4,5-bisphosphate phosphodiesterase delta-1 OS=Homo sapiens OX=9606 GN=PLCD1 PE=1 SV=2"	PLCD1	85.664	1.346	1.064	1.117	0.83	1.368	1.168	1.309	1.333	1.017	0.813	0.985	0.91042
Q9BV19	Uncharacterized protein C1orf50 OS=Homo sapiens OX=9606 GN=C1orf50 PE=1 SV=2	C1orf50	21.876					0.477				0.45	8.922	9.824
P07225	Vitamin K-dependent protein S OS=Homo sapiens OX=9606 GN=PROS1 PE=1 SV=1	PROS1	75.122	0.514	0.589	0.365	0.545	0.538	0.443	0.271	5.311	0.676	2.151	3.47	0.28906
P12318	Low affinity immunoglobulin gamma Fc region receptor II-a OS=Homo sapiens OX=9606 GN=FCGR2A PE=1 SV=4	FCGR2A	35				3.965	0.88				1.035	0.663	0.35	0.40906
P27348	14-3-3 protein theta OS=Homo sapiens OX=9606 GN=YWHAQ PE=1 SV=1	YWHAQ	27.764	1.451	0.737	1.474	0.971	1.964	1.175	1.359	1.154	1.185	0.96	0.884	0.71132
P21291	Cysteine and glycine-rich protein 1 OS=Homo sapiens OX=9606 GN=CSRP1 PE=1 SV=3	CSRP1	20.567	0.791	1.944	1.536	0.5	0.353	0.807	1.231	1.613	1.267	1.279	1.209	0.3165
Q8N0X7	Spartin OS=Homo sapiens OX=9606 GN=SPART PE=1 SV=1	SPART	72.832	0.694	0.827	0.489	0.592	0.409	1.094	1.606	0.728	0.778	1.166	1.784	0.017576
Q93091	Ribonuclease K6 OS=Homo sapiens OX=9606 GN=RNASE6 PE=1 SV=2	RNASE6	17.196	0.287	0.497	0.497			1.279	0.954	1.287			2.748	0.0076798
Q16270	Insulin-like growth factor-binding protein 7 OS=Homo sapiens OX=9606 GN=IGFBP7 PE=1 SV=1	IGFBP7	29.13	0.492	0.706	0.381			0.776	2.317	1.109			2.661	0.070125
P78563	Double-stranded RNA-specific editase 1 OS=Homo sapiens OX=9606 GN=ADARB1 PE=1 SV=1	ADARB1	80.762				1.075	0.746				0.382	2.593	1.634	0.92362
P12955	Xaa-Pro dipeptidase OS=Homo sapiens OX=9606 GN=PEPD PE=1 SV=3	PEPD	54.548	1.475	0.84	0.91	0.81	0.685	1.009	1.527	1.111	1.088	0.976	1.21	0.197399
O95861	"3'(2'),5'-bisphosphate nucleotidase 1 OS=Homo sapiens OX=9606 GN=BPNT1 PE=1 SV=1"	BPNT1	33.392	2.204	0.484	1.235	0.848	0.938	1.533	0.987	0.789	0.462	0.723	0.787	0.5579
P05976	"Myosin light chain 1/3, skeletal muscle isoform OS=Homo sapiens OX=9606 GN=MYL1 PE=1 SV=3"	MYL1	21.145	1.608	2.398	0.584	0.61	0.709	1.612	1.028	2.438	1.206	0.965	1.227	0.37252
Q96FQ6	Protein S100-A16 OS=Homo sapiens OX=9606 GN=S100A16 PE=1 SV=1	S100A16	11.801	0.824	1.205	1.131	0.919	1.1	2.8	1.233	2.657	0.819	0.628	1.571	0.41142
Q8WV28	B-cell linker protein OS=Homo sapiens OX=9606 GN=BLNK PE=1 SV=2	BLNK	50.466	1.673	2.276	2.691			1.573	0.394	0.787			0.415	0.074482
Q96A59	MARVEL domain-containing protein 3 OS=Homo sapiens OX=9606 GN=MARVELD3 PE=2 SV=3	MARVELD3	44.91	1.869	1.772	1.211			1.681	0.514	0.976			0.654	0.2314
Q9P289	Serine/threonine-protein kinase 26 OS=Homo sapiens OX=9606 GN=STK26 PE=1 SV=2	STK26	46.528	1.18	0.488	1.136	1.394	1.374	2.661	0.681	1.245	0.869	0.761	1.116	0.91426
Q9HCP0	Casein kinase I isoform gamma-1 OS=Homo sapiens OX=9606 GN=CSNK1G1 PE=1 SV=1	CSNK1G1	48.511	0.794	2.339	1.103					0.85			0.602
P62750	60S ribosomal protein L23a OS=Homo sapiens OX=9606 GN=RPL23A PE=1 SV=1	RPL23A	17.695	1.098	0.859	0.678			0.847	0.856	1.47			1.204	0.4987
Q8WYA0	Intraflagellar transport protein 81 homolog OS=Homo sapiens OX=9606 GN=IFT81 PE=1 SV=1	IFT81	79.745				0.555	0.447				0.235	2.106	2.336	0.78364
Q96FE7	Phosphoinositide-3-kinase-interacting protein 1 OS=Homo sapiens OX=9606 GN=PIK3IP1 PE=1 SV=2	PIK3IP1	28.248	0.722	2.899	0.839	0.758	0.549	1.106	1.026	0.73	0.626	0.559	0.702	0.57916
Q9HAT8	E3 ubiquitin-protein ligase pellino homolog 2 OS=Homo sapiens OX=9606 GN=PELI2 PE=1 SV=1	PELI2	46.435	1.535	0.627	1.225	0.995	0.997	1.465	0.861	1.176	1.316	1.244	1.127	0.42264
Q14980	Nuclear mitotic apparatus protein 1 OS=Homo sapiens OX=9606 GN=NUMA1 PE=1 SV=2	NUMA1	238.26				1.837	1.338				0.722	1.479	0.693	0.39904
P05089	Arginase-1 OS=Homo sapiens OX=9606 GN=ARG1 PE=1 SV=2	ARG1	34.735				2.27	0.916				1.407	1.022	0.762	0.7384
P51570	Galactokinase OS=Homo sapiens OX=9606 GN=GALK1 PE=1 SV=1	GALK1	42.272	0.757	2.261	0.833		1.151		0.587	0.738	1.352	1.592	0.853	0.69516
P31150	Rab GDP dissociation inhibitor alpha OS=Homo sapiens OX=9606 GN=GDI1 PE=1 SV=2	GDI1	50.582	0.99	1.085	0.864	1.371	1.526	0.678	1.93	1.077	1.056	1.015	0.986	0.80524
P15144	Aminopeptidase N OS=Homo sapiens OX=9606 GN=ANPEP PE=1 SV=4	ANPEP	109.54	1.018	0.914	0.991	0.86	0.873	0.841	1.56	0.836	0.954	1.488	1.22	0.3174
P00751	Complement factor B OS=Homo sapiens OX=9606 GN=CFB PE=1 SV=2	CFB	85.532	0.822	1.615	0.403	0.451	0.482	0.506	0.85	5.393	0.791	1.503	2.397	0.2269
P04083	Annexin A1 OS=Homo sapiens OX=9606 GN=ANXA1 PE=1 SV=2	ANXA1	38.714	0.617	0.819	0.444	1.991	0.372	0.884	1.739	2.078	0.753	1.154	1.557	0.149083
P02511	Alpha-crystallin B chain OS=Homo sapiens OX=9606 GN=CRYAB PE=1 SV=2	CRYAB	20.159	1.574	1.213	1.075	0.889	0.737	0.884	1.131	0.89	0.686	2.084	1.034	0.96256
P36955	Pigment epithelium-derived factor OS=Homo sapiens OX=9606 GN=SERPINF1 PE=1 SV=4	SERPINF1	46.312	0.841	1.878	0.616			1.055	0.506	3.217			1.433	0.77932
Q9H3U5	Major facilitator superfamily domain-containing protein 1 OS=Homo sapiens OX=9606 GN=MFSD1 PE=2 SV=2	MFSD1	51.208	0.935	0.918	0.874	0.975	0.814	0.877	1.519	0.886	1.201	1.666	1.362	0.113485
P57764	Gasdermin-D OS=Homo sapiens OX=9606 GN=GSDMD PE=1 SV=1	GSDMD	52.8	0.973	1.381	1.045			1.486	1.292	1.018			1.117	0.5128
Q6XQN6	Nicotinate phosphoribosyltransferase OS=Homo sapiens OX=9606 GN=NAPRT PE=1 SV=2	NAPRT	57.578	1.93	0.317	0.82	0.559	0.878	0.519	1.005	0.749	0.767	1.075	0.914	0.872
O15243	Leptin receptor gene-related protein OS=Homo sapiens OX=9606 GN=LEPROT PE=1 SV=1	LEPROT	14.254	1.015	0.91	0.512			0.56	0.59	0.173			0.543	0.195183
P22748	Carbonic anhydrase 4 OS=Homo sapiens OX=9606 GN=CA4 PE=1 SV=2	CA4	35.032	0.763	0.897	1.304	0.818	1.259	0.683	0.881	0.773	0.804	1.484	0.917	0.57906
Q9BZW2	Solute carrier family 13 member 1 OS=Homo sapiens OX=9606 GN=SLC13A1 PE=1 SV=1	SLC13A1	66.134	1.084	0.793	0.708	0.84	0.874	1.586	1.121	0.629	0.896	1.66	1.371	0.21334
O15374	Monocarboxylate transporter 5 OS=Homo sapiens OX=9606 GN=SLC16A4 PE=2 SV=1	SLC16A4	54.021	0.84	1.152	0.581			0.707	1.564	0.745			1.172	0.7142
Q15642	Cdc42-interacting protein 4 OS=Homo sapiens OX=9606 GN=TRIP10 PE=1 SV=3	TRIP10	68.351	0.77	0.505	0.671	0.916	1.431	1.374	1.198	1.1	1.152	1.487	1.47	0.041841
O75396	Vesicle-trafficking protein SEC22b OS=Homo sapiens OX=9606 GN=SEC22B PE=1 SV=4	SEC22B	24.593	0.596	1.226	0.962				0.285	0.748			0.557	0.24284
P10768	S-formylglutathione hydrolase OS=Homo sapiens OX=9606 GN=ESD PE=1 SV=2	ESD	31.462	1.8	0.793	1.054	1.023	1.018	0.95	1.191	1.088	1.082	1.376	1	0.83738
P09237	Matrilysin OS=Homo sapiens OX=9606 GN=MMP7 PE=1 SV=1	MMP7	29.676				1.003	1.264				2.489	1.533	1.774	0.176638
O43490	Prominin-1 OS=Homo sapiens OX=9606 GN=PROM1 PE=1 SV=1	PROM1	97.201	0.787	0.712	0.908	1.264	1.1	0.865	1.452	1.065	0.94	0.939	1.103	0.4833
P09467	"Fructose-1,6-bisphosphatase 1 OS=Homo sapiens OX=9606 GN=FBP1 PE=1 SV=5"	FBP1	36.842	0.873	1.538	0.809	1.188	1.03	0.795	1.697	0.82	0.662	0.864	0.89	0.47498
Q969P0	Immunoglobulin superfamily member 8 OS=Homo sapiens OX=9606 GN=IGSF8 PE=1 SV=1	IGSF8	65.033	0.74	0.963	0.807	0.91	1.065	0.448	1.126	0.91	0.633	1.024	0.923	0.51104
O43914	TYRO protein tyrosine kinase-binding protein OS=Homo sapiens OX=9606 GN=TYROBP PE=1 SV=1	TYROBP	12.179				6.201					0.83	1.152	0.16
O43488	Aflatoxin B1 aldehyde reductase member 2 OS=Homo sapiens OX=9606 GN=AKR7A2 PE=1 SV=3	AKR7A2	39.589				0.684	0.665				1.058	1.787	2.109	0.113164
Q8NBL3	Transmembrane protein 178A OS=Homo sapiens OX=9606 GN=TMEM178A PE=2 SV=1	TMEM178A	33.018	0.336	1.43	0.384	0.789	0.564	0.805	1.952	1.078	1.195	0.728	1.644	0.103061
O43598	2'-deoxynucleoside 5'-phosphate N-hydrolase 1 OS=Homo sapiens OX=9606 GN=DNPH1 PE=1 SV=1	DNPH1	19.108	1.226	1.432	0.555				1.002				0.936
O14638	Ectonucleotide pyrophosphatase/phosphodiesterase family member 3 OS=Homo sapiens OX=9606 GN=ENPP3 PE=1 SV=2	ENPP3	100.12	5.867	1.122	2.439			0.747	1.673	0.517			0.312	0.143897
Q13477	Mucosal addressin cell adhesion molecule 1 OS=Homo sapiens OX=9606 GN=MADCAM1 PE=1 SV=2	MADCAM1	40.155	0.677	2.03	0.494			0.26	1.736	1.119			0.973	0.89714
Q14156	Protein EFR3 homolog A OS=Homo sapiens OX=9606 GN=EFR3A PE=1 SV=2	EFR3A	92.923	0.769	0.814	2.287			0.688	0.756	1.087			0.654	0.46156
O43505	"Beta-1,4-glucuronyltransferase 1 OS=Homo sapiens OX=9606 GN=B4GAT1 PE=1 SV=1"	B4GAT1	47.119	0.82	0.579	0.401			1.035	1.416	2.542			2.774	0.041461
O14908	PDZ domain-containing protein GIPC1 OS=Homo sapiens OX=9606 GN=GIPC1 PE=1 SV=2	GIPC1	36.049	1.541	0.731	2.36	1.561	3.201	1.452	0.975	0.863	0.51	0.739	0.483	0.056517
O75167	Phosphatase and actin regulator 2 OS=Homo sapiens OX=9606 GN=PHACTR2 PE=1 SV=2	PHACTR2	69.699	1.518	3.819	3.36			1.534	0.402	0.719			0.305	0.059496
P01116	GTPase KRas OS=Homo sapiens OX=9606 GN=KRAS PE=1 SV=1	KRAS	21.656	0.679	1.119	1.749	0.612	1.489	0.797	1.019	1.038	1.38	1.567	1.027	0.74218
P17927	Complement receptor type 1 OS=Homo sapiens OX=9606 GN=CR1 PE=1 SV=3	CR1	223.66	1.157	0.882	0.478	1.186	0.404	1.22	1.925	1.05	0.89	1.132	1.514	0.105665
P01024	Complement C3 OS=Homo sapiens OX=9606 GN=C3 PE=1 SV=2	C3	187.15	0.709	0.629	0.376	0.865	0.564	0.667	0.299	4.897	0.608	1.923	2.671	0.35968
P12268	Inosine-5'-monophosphate dehydrogenase 2 OS=Homo sapiens OX=9606 GN=IMPDH2 PE=1 SV=2	IMPDH2	55.804	1.031	1.693	0.623			1.039	0.778	0.731			0.761	0.54558
P27824	Calnexin OS=Homo sapiens OX=9606 GN=CANX PE=1 SV=2	CANX	67.567	0.932	1.137	1.001	0.818	0.316	6.756	1.001	1.047	1.263	1.766	2.815	0.090936
Q7Z5G4	Golgin subfamily A member 7 OS=Homo sapiens OX=9606 GN=GOLGA7 PE=1 SV=2	GOLGA7	15.824	0.782	0.662	0.692	1.056	0.674	1.71	1.135	0.771	0.988	1.103	1.476	0.044275
Q9H2G2	STE20-like serine/threonine-protein kinase OS=Homo sapiens OX=9606 GN=SLK PE=1 SV=1	SLK	142.69	1.012	0.834	1.404	1.161	1.782	1.638	0.878	0.893	1.22	0.712	0.862	0.4452
P40925	"Malate dehydrogenase, cytoplasmic OS=Homo sapiens OX=9606 GN=MDH1 PE=1 SV=4"	MDH1	36.426	1.051	1.167	1.174	0.914	1.259	0.631	1.079	1.162	0.582	1.289	0.852	0.27186
Q9Y6A4	Cilia- and flagella-associated protein 20 OS=Homo sapiens OX=9606 GN=CFAP20 PE=1 SV=1	CFAP20	22.774	3.362	0.95	1.601			0.786	1.434	0.942			0.535	0.26802
Q9P265	Disco-interacting protein 2 homolog B OS=Homo sapiens OX=9606 GN=DIP2B PE=1 SV=3	DIP2B	171.49	0.929	1.595	1.086	1.635	1.659	1.596	0.924	0.787	0.996	0.848	0.746	0.123738
Q9BS40	Latexin OS=Homo sapiens OX=9606 GN=LXN PE=1 SV=2	LXN	25.75	1.428	0.932	2.921			0.992	0.385	0.761			0.405	0.118738
Q8N6F1	Claudin-19 OS=Homo sapiens OX=9606 GN=CLDN19 PE=1 SV=2	CLDN19	23.229				0.6	0.571				1.699	0.692	2.042	0.30402
Q9UJU6	Drebrin-like protein OS=Homo sapiens OX=9606 GN=DBNL PE=1 SV=1	DBNL	48.207	1.795	5.188	2.16	1.921	3.11	0.647	0.618	0.57	0.575	0.675	0.218	0.00193532
P62263	40S ribosomal protein S14 OS=Homo sapiens OX=9606 GN=RPS14 PE=1 SV=3	RPS14	16.273				1.107	0.752				0.542	1.494	1.095	0.98198
Q9BST9	Rhotekin OS=Homo sapiens OX=9606 GN=RTKN PE=1 SV=2	RTKN	62.667	1.127	0.717	0.592			0.939	1.321	1.685			1.619	0.126516
Q9BZ29	Dedicator of cytokinesis protein 9 OS=Homo sapiens OX=9606 GN=DOCK9 PE=1 SV=2	DOCK9	236.44	0.764	0.869	1.469	0.972	1.791	1.607	0.786	1.227	0.806	0.878	0.904	0.69292
Q14192	Four and a half LIM domains protein 2 OS=Homo sapiens OX=9606 GN=FHL2 PE=1 SV=3	FHL2	32.193	0.888	1.004	1.432			1.201	0.423	0.871			0.751	0.3578
Q9H0X4	Protein FAM234A OS=Homo sapiens OX=9606 GN=FAM234A PE=1 SV=1	FAM234A	59.659	0.501	0.745	0.567			1.316	1.953	0.525			2.093	0.2033
A0A0C4DH34	Immunoglobulin heavy variable 4-28 OS=Homo sapiens OX=9606 GN=IGHV4-28 PE=3 SV=1	IGHV4-28	13.124	0.659	0.708	0.587	0.734	1.283	8.706	0.419	1.66	0.768	0.62	3.065	0.43264
P08174	Complement decay-accelerating factor OS=Homo sapiens OX=9606 GN=CD55 PE=1 SV=4	CD55	41.4	0.674	1.126	1.311	1.459	3.301	1.275	0.805	1.104	1.348	1.004	0.703	0.42794
O60241	Adhesion G protein-coupled receptor B2 OS=Homo sapiens OX=9606 GN=ADGRB2 PE=1 SV=2	ADGRB2	172.65				6.566	1.516				0.271	0.462	0.091	0.107057
Q71RC9	Small integral membrane protein 5 OS=Homo sapiens OX=9606 GN=SMIM5 PE=1 SV=2	SMIM5	8.5403	3.086		1.649	1.024	1.282	1.027	1.463	0.917	1.111	0.808	0.605	0.112159
P31946	14-3-3 protein beta/alpha OS=Homo sapiens OX=9606 GN=YWHAB PE=1 SV=3	YWHAB	28.082	0.958	1.134	1.691	1.137	2.499	1.459	1.468	1.168	1.239	0.961	0.848	0.57226
Q8WUJ0	Serine/threonine/tyrosine-interacting protein OS=Homo sapiens OX=9606 GN=STYX PE=1 SV=1	STYX	25.492				10.119	1.057				0.543	0.586	0.101	0.36382
P61769	Beta-2-microglobulin OS=Homo sapiens OX=9606 GN=B2M PE=1 SV=1	B2M	13.714				2.457	0.653				1.831	1.487	1.067	0.73144
Q86YS7	C2 domain-containing protein 5 OS=Homo sapiens OX=9606 GN=C2CD5 PE=1 SV=1	C2CD5	110.45	1.269	1.056	1.312			1.704	1.531	0.952			1.151	0.57952
O96013	Serine/threonine-protein kinase PAK 4 OS=Homo sapiens OX=9606 GN=PAK4 PE=1 SV=1	PAK4	64.071	2.486	2.348	6.686	3.679	1.633	1.789	0.723	0.343	0.946	1.015	0.286	0.0080367
Q14344	Guanine nucleotide-binding protein subunit alpha-13 OS=Homo sapiens OX=9606 GN=GNA13 PE=1 SV=2	GNA13	44.049	0.927	0.838	1.439	1.291	1.848	1.008	1.162	1.152	0.883	1.257	0.861	0.48508
P00813	Adenosine deaminase OS=Homo sapiens OX=9606 GN=ADA PE=1 SV=3	ADA	40.764				3.263	0.439				1.275	1.877	0.851	0.82508
O00161	Synaptosomal-associated protein 23 OS=Homo sapiens OX=9606 GN=SNAP23 PE=1 SV=1	SNAP23	23.354	1.125	1.217	1.703	1.06	3.108	0.85	0.833	0.765	1.026	0.848	0.526	0.052779
P0DP57	Secreted Ly-6/uPAR domain-containing protein 2 OS=Homo sapiens OX=9606 GN=SLURP2 PE=1 SV=1	SLURP2	10.16	1.455	1.325	0.644			1.039	0.817	0.454			0.675	0.33494
Q12913	Receptor-type tyrosine-protein phosphatase eta OS=Homo sapiens OX=9606 GN=PTPRJ PE=1 SV=3	PTPRJ	145.94	1.166	1.168	1.1	1.882	1.025	1.059	0.958	0.938	1.581	1.304	0.921	0.61192
Q8IV45	UNC5C-like protein OS=Homo sapiens OX=9606 GN=UNC5CL PE=1 SV=2	UNC5CL	57.818	2.329	2.919	1.873			0.369	0.596	0.355			0.185	0.00127754
Q9P2T1	GMP reductase 2 OS=Homo sapiens OX=9606 GN=GMPR2 PE=1 SV=1	GMPR2	37.874	0.811	1.054	0.496			1.11	1.937	1.277	0.487		1.528	0.39886
P17252	Protein kinase C alpha type OS=Homo sapiens OX=9606 GN=PRKCA PE=1 SV=4	PRKCA	76.749	2.233	2.298	1.951	0.835	0.61	1.65	1.431	0.549	0.394	0.912	0.623	0.25364
P61981	14-3-3 protein gamma OS=Homo sapiens OX=9606 GN=YWHAG PE=1 SV=2	YWHAG	28.302	1.748	0.733	1.289	1.079	1.385	1.616	1.219	0.617	0.713	0.943	0.819	0.35938
Q8NFT8	Delta and Notch-like epidermal growth factor-related receptor OS=Homo sapiens OX=9606 GN=DNER PE=1 SV=1	DNER	78.474	0.872	1.96	0.67			0.888	1.17	1.036			0.883	0.95352
Q96EF6	F-box only protein 17 OS=Homo sapiens OX=9606 GN=FBXO17 PE=1 SV=1	FBXO17	31.479	0.608	0.765	1.522			0.863	1.298	0.719			0.995	0.90152
P10644	cAMP-dependent protein kinase type I-alpha regulatory subunit OS=Homo sapiens OX=9606 GN=PRKAR1A PE=1 SV=1	PRKAR1A	42.981	0.836	1.62	1			1.77	0.939	0.586			0.953	0.78476
Q9H3R2	Mucin-13 OS=Homo sapiens OX=9606 GN=MUC13 PE=1 SV=3	MUC13	54.603	3.561	2.176	1.293	1.954	2.404	2.693	1.238	2.513	0.855	1.056	0.734	0.23482
P62877	E3 ubiquitin-protein ligase RBX1 OS=Homo sapiens OX=9606 GN=RBX1 PE=1 SV=1	RBX1	12.274	1.449	1.161	1.02	1.04	1.394	1.968	0.99	1.76	1.305	1.078	1.171	0.4105
O75110	Probable phospholipid-transporting ATPase IIA OS=Homo sapiens OX=9606 GN=ATP9A PE=1 SV=3	ATP9A	118.58	1.077	2.575	0.672	0.971	0.508	1.337	1.847	0.567	1.268	0.456	0.943	0.94898
P56537	Eukaryotic translation initiation factor 6 OS=Homo sapiens OX=9606 GN=EIF6 PE=1 SV=1	EIF6	26.599	0.852	0.424	1.728			0.916	1.366	1.4			1.226	0.4669
Q7L7X3	Serine/threonine-protein kinase TAO1 OS=Homo sapiens OX=9606 GN=TAOK1 PE=1 SV=1	TAOK1	116.07	1.197	1.198	1.254	0.717	0.895	1.228	0.819	1.091	1.122	0.897	0.98	0.94846
Q01970	"1-phosphatidylinositol 4,5-bisphosphate phosphodiesterase beta-3 OS=Homo sapiens OX=9606 GN=PLCB3 PE=1 SV=2"	PLCB3	138.8	0.776	0.483	1.643	1.455	2.956	1.348	1.051	1.098	1.142	0.961	0.766	0.79636
P02747	Complement C1q subcomponent subunit C OS=Homo sapiens OX=9606 GN=C1QC PE=1 SV=3	C1QC	25.773	0.559	0.605		1.092	0.293	0.608	0.303	6.368	0.996	1.554	3.085	0.3164
Q9HAV0	Guanine nucleotide-binding protein subunit beta-4 OS=Homo sapiens OX=9606 GN=GNB4 PE=1 SV=3	GNB4	37.567	0.743	0.463	1.593			1.527	1.445	1.897			1.74	0.14048
P49913	Cathelicidin antimicrobial peptide OS=Homo sapiens OX=9606 GN=CAMP PE=1 SV=1	CAMP	19.301	0.358	0.544	0.276	5.582	2.047	4.843	0.447	0.374	1.344	0.775	0.884	0.93322
P0DP25	Calmodulin-3 OS=Homo sapiens OX=9606 GN=CALM3 PE=1 SV=1	CALM3	16.837	0.82	1.331	2.166	0.727	0.852	1.27	0.656	0.456	1.523	0.994	0.831	0.54888
P05023	Sodium/potassium-transporting ATPase subunit alpha-1 OS=Homo sapiens OX=9606 GN=ATP1A1 PE=1 SV=1	ATP1A1	112.89	0.986	1.002	0.659	0.96	0.391	0.506	2.274	0.67	0.945	0.796	1.298	0.5956
Q8IYE0	Coiled-coil domain-containing protein 146 OS=Homo sapiens OX=9606 GN=CCDC146 PE=1 SV=2	CCDC146	112.81	1.783	0.592	1.004			2.288	1.532	1.339			1.527	0.23672
P06737	"Glycogen phosphorylase, liver form OS=Homo sapiens OX=9606 GN=PYGL PE=1 SV=4"	PYGL	97.147	0.749	0.595	0.454			1.33	0.506	2.62			2.478	0.22132
Q9Y5J5	Pleckstrin homology-like domain family A member 3 OS=Homo sapiens OX=9606 GN=PHLDA3 PE=1 SV=1	PHLDA3	13.891	1.264	0.953	1.691			1.978	0.902	1.339			1.08	0.85908
O15143	Actin-related protein 2/3 complex subunit 1B OS=Homo sapiens OX=9606 GN=ARPC1B PE=1 SV=3	ARPC1B	40.949	0.76	0.734	0.854	1.812	2.078	0.778	0.732	1.199	0.531	0.798	0.647	0.198259
P62820	Ras-related protein Rab-1A OS=Homo sapiens OX=9606 GN=RAB1A PE=1 SV=3	RAB1A	22.677	1.378	0.861	1.13	0.932	0.948	0.997	1.42	0.864	0.775	1.072	0.977	0.82412
Q6EMK4	Vasorin OS=Homo sapiens OX=9606 GN=VASN PE=1 SV=1	VASN	71.712	0.962	1.042	0.726	0.965	0.662	0.917	1.298	1.326	1.049	1.024	1.289	0.053682
Q96DG6	Carboxymethylenebutenolidase homolog OS=Homo sapiens OX=9606 GN=CMBL PE=1 SV=1	CMBL	28.048	1.073	1.274	0.698	0.595	0.699	0.674	1.801	0.966	0.934	1.373	1.325	0.26642
Q8NHG8	E3 ubiquitin-protein ligase ZNRF2 OS=Homo sapiens OX=9606 GN=ZNRF2 PE=1 SV=1	ZNRF2	24.115	1.831	1.152	1.294	1.535	1.508	1.081	0.61	0.466	1.525	1.202	0.667	0.073661
P23528	Cofilin-1 OS=Homo sapiens OX=9606 GN=CFL1 PE=1 SV=3	CFL1	18.502	0.611	2.457	1.206	2.887	5.455	0.806	1.01	0.804	0.889	0.63	0.328	0.086464
O95171	Sciellin OS=Homo sapiens OX=9606 GN=SCEL PE=1 SV=2	SCEL	77.551	0.831	1.343	0.635			1.264	0.654	0.965			1.026	0.89864
P57739	Claudin-2 OS=Homo sapiens OX=9606 GN=CLDN2 PE=1 SV=1	CLDN2	24.548	0.69	0.73	0.314	0.481	0.347	0.552	1.552	0.693	3.334	0.925	2.754	0.048424
Q9Y6R1	Electrogenic sodium bicarbonate cotransporter 1 OS=Homo sapiens OX=9606 GN=SLC4A4 PE=1 SV=1	SLC4A4	121.46	0.494	0.868	0.435	0.547	0.113	0.598	3.345	0.378	0.917	0.804	2.459	0.15942
Q9Y6Q1	Calpain-6 OS=Homo sapiens OX=9606 GN=CAPN6 PE=1 SV=2	CAPN6	74.576	1.023	1.233	1.106	0.62	0.385	0.677	1.259	1.201	0.4	0.571	0.941	0.82526
P02654	Apolipoprotein C-I OS=Homo sapiens OX=9606 GN=APOC1 PE=1 SV=1	APOC1	9.3318	0.594	0.658	0.368	0.642	0.525	0.554	0.686	3.056	0.826	3.022	2.922	0.102077
Q6GMV3	Putative peptidyl-tRNA hydrolase PTRHD1 OS=Homo sapiens OX=9606 GN=PTRHD1 PE=1 SV=1	PTRHD1	15.805				0.971	1.14				0.917	1.103	0.957	0.7477
Q96C23	Aldose 1-epimerase OS=Homo sapiens OX=9606 GN=GALM PE=1 SV=1	GALM	37.765	1.934	1.107	0.733	0.535	0.939	0.57	1.351	0.871	0.514	0.661	0.756	0.39542
P84085	ADP-ribosylation factor 5 OS=Homo sapiens OX=9606 GN=ARF5 PE=1 SV=2	ARF5	20.529				1.497	1.127				0.859	1.118	0.753	0.283
Q93050	V-type proton ATPase 116 kDa subunit a isoform 1 OS=Homo sapiens OX=9606 GN=ATP6V0A1 PE=1 SV=3	ATP6V0A1	96.412	1.553	1.308	0.811	0.926	0.561	0.987	1.215	0.566	1.184	1.173	0.993	0.93514
Q16851	UTP--glucose-1-phosphate uridylyltransferase OS=Homo sapiens OX=9606 GN=UGP2 PE=1 SV=5	UGP2	56.94	0.899	0.601	0.694	1.08	1.056	0.835	0.823	2.234	0.891	1.447	1.439	0.21622
Q8N9N7	Leucine-rich repeat-containing protein 57 OS=Homo sapiens OX=9606 GN=LRRC57 PE=1 SV=1	LRRC57	26.754	1.109	1.119	1.317	1.136	1.358	0.768	0.939	0.963	0.962	0.981	0.764	0.0026826
P25311	Zinc-alpha-2-glycoprotein OS=Homo sapiens OX=9606 GN=AZGP1 PE=1 SV=2	AZGP1	34.258	1.198	2.032	0.729	0.417	0.318	0.815	1.309	0.62	0.523	0.512	0.805	0.88518
P50995	Annexin A11 OS=Homo sapiens OX=9606 GN=ANXA11 PE=1 SV=1	ANXA11	54.389	2.291	1.21	2.21	1.276	1.303	0.967	0.833	0.781	0.977	0.664	0.509	0.003741
Q9H788	SH2 domain-containing protein 4A OS=Homo sapiens OX=9606 GN=SH2D4A PE=1 SV=1	SH2D4A	52.726	1.067	1.138	2.131	0.959	1.677	1.368	0.615	1.442	1.118	0.604	0.738	0.21814
Q8NDC0	MAPK-interacting and spindle-stabilizing protein-like OS=Homo sapiens OX=9606 GN=MAPK1IP1L PE=1 SV=4	MAPK1IP1L	24.269	2.684	1.912	1.636			0.533	0.973	0.838			0.376	0.0132221
Q9Y4C2	TRPM8 channel-associated factor 1 OS=Homo sapiens OX=9606 GN=TCAF1 PE=1 SV=3	TCAF1	102.12	1.376	1.491	0.948			1.476	1.025	0.983			0.913	0.66244
Q9NQX7	Integral membrane protein 2C OS=Homo sapiens OX=9606 GN=ITM2C PE=1 SV=1	ITM2C	30.223	0.439	0.732	0.442	0.325	0.512	0.198	1.603	1.071	1.086	0.568	1.847	0.29506
O43776	"Asparagine--tRNA ligase, cytoplasmic OS=Homo sapiens OX=9606 GN=NARS1 PE=1 SV=1"	NARS1	62.942	1.061	3.453	0.571			1.172	1.154	1.281			0.709	0.91628
P52907	F-actin-capping protein subunit alpha-1 OS=Homo sapiens OX=9606 GN=CAPZA1 PE=1 SV=3	CAPZA1	32.922	1.482	3.249	1.271	3.051	2.628	1.512	1.337	1.035	1.127	0.866	0.503	0.0187607
Q9UKK9	ADP-sugar pyrophosphatase OS=Homo sapiens OX=9606 GN=NUDT5 PE=1 SV=1	NUDT5	24.327	0.381	1.309	1.047	1.353	1.365	1.74	1.509	1.83	0.564	1.28	1.269	0.45376
Q9BRF8	Serine/threonine-protein phosphatase CPPED1 OS=Homo sapiens OX=9606 GN=CPPED1 PE=1 SV=3	CPPED1	35.548				0.9	1.251				0.766	1.171	0.901	0.71336
Q96T58	Msx2-interacting protein OS=Homo sapiens OX=9606 GN=SPEN PE=1 SV=1	SPEN	402.24				2.685	1.12				0.469	3.685	1.092	0.8277
Q9UL46	Proteasome activator complex subunit 2 OS=Homo sapiens OX=9606 GN=PSME2 PE=1 SV=4	PSME2	27.401	0.453	6.874	0.627			0.954	1.118	0.815			0.363	0.78404
Q92597	Protein NDRG1 OS=Homo sapiens OX=9606 GN=NDRG1 PE=1 SV=1	NDRG1	42.835	1.362	3.392	0.816	2.203	1.34	1.351	0.978	0.757	2.113	0.24	0.597	0.196823
P34932	Heat shock 70 kDa protein 4 OS=Homo sapiens OX=9606 GN=HSPA4 PE=1 SV=4	HSPA4	94.33	1.133	2.299	1.028	0.896	0.774	0.983	0.801	0.628	0.747	1.018	0.681	0.164283
Q8TEJ3	E3 ubiquitin-protein ligase SH3RF3 OS=Homo sapiens OX=9606 GN=SH3RF3 PE=1 SV=2	SH3RF3	92.775	0.885	1.872	1.233			1.206	0.762	1.378			0.839	0.60136
Q9H1C7	Cysteine-rich and transmembrane domain-containing protein 1 OS=Homo sapiens OX=9606 GN=CYSTM1 PE=1 SV=1	CYSTM1	10.631	0.497	0.93	0.634	0.771	0.693	0.675	1.952	1.202	1.156	1.122	1.732	0.031485
Q13113	PDZK1-interacting protein 1 OS=Homo sapiens OX=9606 GN=PDZK1IP1 PE=1 SV=1	PDZK1IP1	12.227	1.51	2.063	1.786	0.751	1.472	0.409	1.717	0.725	0.965	1.091	0.647	0.135458
O43653	Prostate stem cell antigen OS=Homo sapiens OX=9606 GN=PSCA PE=1 SV=2	PSCA	11.959	0.34	0.454	3.522	3.209	5.375	0.228	0.219	0.244	0.918	0.484	0.162	0.047438
O43291	Kunitz-type protease inhibitor 2 OS=Homo sapiens OX=9606 GN=SPINT2 PE=1 SV=2	SPINT2	28.228	1.553	0.581	0.619	1.329	1.451	0.553	1.718	1.199	0.908	0.75	0.927	0.82718
P19440	Glutathione hydrolase 1 proenzyme OS=Homo sapiens OX=9606 GN=GGT1 PE=1 SV=2	GGT1	61.409	0.956	0.633	0.973	1.041	0.944	0.642	1.215	0.762	1.167	1.45	1.152	0.5497
Q13510	Acid ceramidase OS=Homo sapiens OX=9606 GN=ASAH1 PE=1 SV=5	ASAH1	44.659	0.469	0.633	0.346	0.622	0.705	0.948	1.229	0.725	2.862	1.411	2.586	0.0114606
Q15257	Serine/threonine-protein phosphatase 2A activator OS=Homo sapiens OX=9606 GN=PTPA PE=1 SV=3	PTPA	40.667	1.825	1.604	1.106			0.961	1.284	1.561			0.839	0.44784
P26447	Protein S100-A4 OS=Homo sapiens OX=9606 GN=S100A4 PE=1 SV=1	S100A4	11.728				2.768	1.063				0.748	0.767	0.395	0.33726
Q14703	Membrane-bound transcription factor site-1 protease OS=Homo sapiens OX=9606 GN=MBTPS1 PE=1 SV=1	MBTPS1	117.75	0.869	1.856	0.637			1.558	0.704	3.828			1.811	0.46616
Q92994	Transcription factor IIIB 90 kDa subunit OS=Homo sapiens OX=9606 GN=BRF1 PE=1 SV=1	BRF1	73.839	0.501	0.156	0.076		0.074	0.274		8.571	0.351	2.748	14.8	0.063863
P48556	26S proteasome non-ATPase regulatory subunit 8 OS=Homo sapiens OX=9606 GN=PSMD8 PE=1 SV=2	PSMD8	39.611				0.519	0.544				1.049	0.855	1.791	0.031416
Q13131	5'-AMP-activated protein kinase catalytic subunit alpha-1 OS=Homo sapiens OX=9606 GN=PRKAA1 PE=1 SV=4	PRKAA1	64.009				1.831	0.96				1.122	1.672	1.001	0.93946
Q14002	Carcinoembryonic antigen-related cell adhesion molecule 7 OS=Homo sapiens OX=9606 GN=CEACAM7 PE=1 SV=1	CEACAM7	29.379	0.544	0.495	0.621	3.486	6.479	0.341	0.123	0.577	1.049	1.864	0.34	0.25422
O15305	Phosphomannomutase 2 OS=Homo sapiens OX=9606 GN=PMM2 PE=1 SV=1	PMM2	28.082	0.809	0.715	0.442	0.862	1.738	1.183	1.475	1.623	1.221	0.832	1.387	0.142798
Q8IWA5	Choline transporter-like protein 2 OS=Homo sapiens OX=9606 GN=SLC44A2 PE=1 SV=3	SLC44A2	80.123	1.136	1.29	1.11	0.729	0.49	1.276	1.214	0.993	1.279	0.971	1.206	0.244
Q9UNF0	Protein kinase C and casein kinase substrate in neurons protein 2 OS=Homo sapiens OX=9606 GN=PACSIN2 PE=1 SV=2	PACSIN2	55.738	1.143	0.953	1.767	0.753	0.765	1.519	0.661	0.768	1.076	1.086	0.95	0.85148
O95817	BAG family molecular chaperone regulator 3 OS=Homo sapiens OX=9606 GN=BAG3 PE=1 SV=3	BAG3	61.594	0.776	2.858	1.098			1.287	0.977	1.588			0.814	0.8809
Q9H910	Jupiter microtubule associated homolog 2 OS=Homo sapiens OX=9606 GN=JPT2 PE=1 SV=1	JPT2	20.063	0.721	1.486	1.048	1.337	1.883	1.092	0.659	0.812	1.18	0.889	0.715	0.153862
O00560	Syntenin-1 OS=Homo sapiens OX=9606 GN=SDCBP PE=1 SV=1	SDCBP	32.444	1.596	1.31	1.133	0.94	0.84	0.987	1.09	1.032	1.506	1.083	0.979	0.96344
P54920	Alpha-soluble NSF attachment protein OS=Homo sapiens OX=9606 GN=NAPA PE=1 SV=3	NAPA	33.232	1.006	1.033	1.207	1.22	1.529	1.181	1.501	0.933	1.002	1.378	1	0.96802
Q9H0U4	Ras-related protein Rab-1B OS=Homo sapiens OX=9606 GN=RAB1B PE=1 SV=1	RAB1B	22.171	2.917	1.543	1.889	2.278	2.211	3.907	0.579	0.3	0.782	0.829	0.59	0.103235
Q8N697	Solute carrier family 15 member 4 OS=Homo sapiens OX=9606 GN=SLC15A4 PE=1 SV=1	SLC15A4	62.033				1.394	0.848				0.687	1.546	0.996	0.92068
Q86SQ4	Adhesion G-protein coupled receptor G6 OS=Homo sapiens OX=9606 GN=ADGRG6 PE=1 SV=3	ADGRG6	136.69	0.913	0.699	0.857	1.099	1.159	1.243	0.903	0.788	0.888	1.067	1.034	0.7673
Q9UKS6	Protein kinase C and casein kinase substrate in neurons protein 3 OS=Homo sapiens OX=9606 GN=PACSIN3 PE=1 SV=2	PACSIN3	48.486	1.142	1.473	0.947	1.513	2.169	0.871	1.17	0.839	0.832	0.846	0.629	0.023441
Q8N128	Protein FAM177A1 OS=Homo sapiens OX=9606 GN=FAM177A1 PE=1 SV=1	FAM177A1	23.757	1.95	0.681	0.873			0.427	1.083	0.481			0.568	0.27134
P21926	CD9 antigen OS=Homo sapiens OX=9606 GN=CD9 PE=1 SV=4	CD9	25.416	0.407	0.549	0.508	0.798	0.682	0.841	0.677	0.641	0.179	0.771	1.056	0.89772
Q15691	Microtubule-associated protein RP/EB family member 1 OS=Homo sapiens OX=9606 GN=MAPRE1 PE=1 SV=3	MAPRE1	29.999	1.323	2.516	0.848			1.55	0.753	0.805			0.663	0.40118
P28676	Grancalcin OS=Homo sapiens OX=9606 GN=GCA PE=1 SV=2	GCA	24.01	2.773	0.424	1.235			2.111	0.903	0.772			0.854	0.99466
Q9Y6W3	Calpain-7 OS=Homo sapiens OX=9606 GN=CAPN7 PE=1 SV=1	CAPN7	92.651	1.651	0.863	1.172	0.624	0.824	0.804	1.061	1.053	1.051	0.993	0.966	0.92464
P15559	NAD(P)H dehydrogenase [quinone] 1 OS=Homo sapiens OX=9606 GN=NQO1 PE=1 SV=1	NQO1	30.867	1.403	0.668	0.973			1.991	0.563	1.927			1.472	0.57202
P23526	Adenosylhomocysteinase OS=Homo sapiens OX=9606 GN=AHCY PE=1 SV=4	AHCY	47.716	1.01	0.851	0.836	0.758	1.186	0.697	1.122	0.882	0.982	1.17	1.046	0.74684
P16403	Histone H1.2 OS=Homo sapiens OX=9606 GN=H1-2 PE=1 SV=2	H1-2	21.364				0.49	1.7				1.384	3.097	2.046	0.38418
P0DMP2	SLIT-ROBO Rho GTPase-activating protein 2B OS=Homo sapiens OX=9606 GN=SRGAP2B PE=3 SV=1	SRGAP2B	53.405				1.142	1.008				1.203	0.789	0.927	0.7038
Q9UM22	Mammalian ependymin-related protein 1 OS=Homo sapiens OX=9606 GN=EPDR1 PE=1 SV=2	EPDR1	25.437	0.686	1.966	1.262			1.78	1.223	0.955			1.011	0.86008
A0A075B6I4	Immunoglobulin lambda variable 10-54 OS=Homo sapiens OX=9606 GN=IGLV10-54 PE=3 SV=1	IGLV10-54	12.395	0.444	0.493	0.267	13.519	1.395	0.246	0.266	1.521	0.829	0.844	0.23	0.50178
Q96D71	RalBP1-associated Eps domain-containing protein 1 OS=Homo sapiens OX=9606 GN=REPS1 PE=1 SV=3	REPS1	86.661				1.092	2.508				1.287	0.493	0.494	0.3685
P20160	Azurocidin OS=Homo sapiens OX=9606 GN=AZU1 PE=1 SV=3	AZU1	26.885	0.262	0.908	0.245	2.371	0.409	6.204	0.566	0.373	1.405	1.112	2.303	0.29824
P80511	Protein S100-A12 OS=Homo sapiens OX=9606 GN=S100A12 PE=1 SV=2	S100A12	10.575				2.917	0.487				0.906	1.89	0.821	0.9319
Q8N485	Protein limb expression 1 homolog OS=Homo sapiens OX=9606 GN=LIX1 PE=2 SV=2	LIX1	31.891	8.56	1.016	0.695			0.646	0.531	1.117			0.223	0.32102
Q9UBV8	Peflin OS=Homo sapiens OX=9606 GN=PEF1 PE=1 SV=1	PEF1	30.381	4.099	1.188	3.185	1.421	2.466	1.09	0.492	0.403	0.541	0.276	0.227	0.00184128
O95716	Ras-related protein Rab-3D OS=Homo sapiens OX=9606 GN=RAB3D PE=1 SV=1	RAB3D	24.267	1.162	13.04	0.753	1.072	0.518	1.205	1.222	0.478	1.918	0.309	0.31	0.4339
P30050	60S ribosomal protein L12 OS=Homo sapiens OX=9606 GN=RPL12 PE=1 SV=1	RPL12	17.818	1.523	2.414	1.128			2.012	0.799	1.628			0.876	0.68894
P41222	Prostaglandin-H2 D-isomerase OS=Homo sapiens OX=9606 GN=PTGDS PE=1 SV=1	PTGDS	21.029	0.876	1.683	0.806	0.944	1.019	0.664	1.325	0.201	0.265	0.106	0.481	0.079543
Q15714	TSC22 domain family protein 1 OS=Homo sapiens OX=9606 GN=TSC22D1 PE=1 SV=3	TSC22D1	109.68	1.826	1.065	0.932			1.294	0.953	1.017			0.854	0.6154
Q9BUT1	3-hydroxybutyrate dehydrogenase type 2 OS=Homo sapiens OX=9606 GN=BDH2 PE=1 SV=2	BDH2	26.724	1.348	0.645	0.797	0.849	0.771	0.612	1.816	1.033	0.817	1.261	1.256	0.4139
O60234	Glia maturation factor gamma OS=Homo sapiens OX=9606 GN=GMFG PE=1 SV=1	GMFG	16.801	0.579	5.584				3.235	0.371	0.428			0.436	0.55966
P21741	Midkine OS=Homo sapiens OX=9606 GN=MDK PE=1 SV=1	MDK	15.585	0.52	0.968	0.941	0.459	0.956	2.188	1.687	2.314	2.238	1.563	2.599	0.00064431
Q92542	Nicastrin OS=Homo sapiens OX=9606 GN=NCSTN PE=1 SV=2	NCSTN	78.41	1.256	0.776	0.901			0.757	0.636	0.793			0.745	0.152417
Q7L1Q6	Basic leucine zipper and W2 domain-containing protein 1 OS=Homo sapiens OX=9606 GN=BZW1 PE=1 SV=1	BZW1	48.043	1.815	1.452	1.381			1.69	0.334	0.15			0.468	0.22264
Q8IY42	Uncharacterized protein C4orf19 OS=Homo sapiens OX=9606 GN=C4orf19 PE=1 SV=1	C4orf19	33.741	0.745	0.649	1.471	1.701	1.906	1.809	0.614	1.026	0.916	0.932	0.818	0.55668
P09958	Furin OS=Homo sapiens OX=9606 GN=FURIN PE=1 SV=2	FURIN	86.677				0.869	1.209				0.459	0.365	0.397	0.044738
Q9BRK3	Matrix remodeling-associated protein 8 OS=Homo sapiens OX=9606 GN=MXRA8 PE=1 SV=1	MXRA8	49.131	0.614	0.758	0.492	0.514	1.015	0.297	1.162	3.559	0.838	0.804	1.963	0.38428
P34949	Mannose-6-phosphate isomerase OS=Homo sapiens OX=9606 GN=MPI PE=1 SV=2	MPI	46.655	0.926	1.584	0.785			0.537	1.306	1.003			0.864	0.65254
Q8IY95	Transmembrane protein 192 OS=Homo sapiens OX=9606 GN=TMEM192 PE=1 SV=1	TMEM192	30.922	0.907	0.756	1.848	0.602	0.657	0.469	1.074	0.597	0.911	1.655	0.987	0.94816
P09211	Glutathione S-transferase P OS=Homo sapiens OX=9606 GN=GSTP1 PE=1 SV=2	GSTP1	23.356	0.217	0.342	1.504	0.6	0.448	1.294	1.517	2.794	1.431	1.603	2.777	0.0088031
Q9HDC9	Adipocyte plasma membrane-associated protein OS=Homo sapiens OX=9606 GN=APMAP PE=1 SV=2	APMAP	46.48	0.18	0.663	0.224	1.794	0.678	3.152	0.52	1.017	1.655	1.728	2.281	0.08874
P25024	C-X-C chemokine receptor type 1 OS=Homo sapiens OX=9606 GN=CXCR1 PE=1 SV=2	CXCR1	39.791	0.503	0.655	0.334	1.679	0.382	9.509	0.593	0.313	1.324	1.419	3.703	0.26494
P08758	Annexin A5 OS=Homo sapiens OX=9606 GN=ANXA5 PE=1 SV=2	ANXA5	35.936	0.997	0.652	1.031	1.274	0.834	1.072	1.323	0.864	1.046	1.53	1.219	0.21334
O60266	Adenylate cyclase type 3 OS=Homo sapiens OX=9606 GN=ADCY3 PE=1 SV=3	ADCY3	128.96	0.811	0.941	1.354			1.248	0.519	0.283			0.66	0.27556
P20742	Pregnancy zone protein OS=Homo sapiens OX=9606 GN=PZP PE=1 SV=4	PZP	163.86				0.45	0.356				0.214	1.275	1.847	0.79526
P51665	26S proteasome non-ATPase regulatory subunit 7 OS=Homo sapiens OX=9606 GN=PSMD7 PE=1 SV=2	PSMD7	37.025				0.618	0.479				0.741	1.191	1.761	0.179738
P01042	Kininogen-1 OS=Homo sapiens OX=9606 GN=KNG1 PE=1 SV=2	KNG1	71.957	0.861	0.935	0.361	0.945	0.482	0.518	0.929	1.413	1.562	1.229	1.577	0.140739
Q9NP72	Ras-related protein Rab-18 OS=Homo sapiens OX=9606 GN=RAB18 PE=1 SV=1	RAB18	22.977	1.2	1.039	0.926	1.237	1.48	1.004	0.629	0.5	1.607	1.383	0.871	0.3803
Q9BT76	Uroplakin-3b OS=Homo sapiens OX=9606 GN=UPK3B PE=1 SV=2	UPK3B	33.881	0.776	0.663	4.479			0.338	0.203	1.369			0.323	0.27148
Q6PIF6	Unconventional myosin-VIIb OS=Homo sapiens OX=9606 GN=MYO7B PE=1 SV=2	MYO7B	241.6	1.496	1.049	0.944	1.058	2.35	0.816	1.727	0.866	1.39	0.865	0.821	0.439
O60884	DnaJ homolog subfamily A member 2 OS=Homo sapiens OX=9606 GN=DNAJA2 PE=1 SV=1	DNAJA2	45.745	1.421	1.002	1.526	1.041	1.268	0.881	0.898	0.813	0.763	1.247	0.735	0.03158
P62745	Rho-related GTP-binding protein RhoB OS=Homo sapiens OX=9606 GN=RHOB PE=1 SV=1	RHOB	22.123	0.79	0.422	1.288	1.286	1.623	0.932	1.138	1.182	1.059	1.171	1.013	0.67598
Q9BX79	Receptor for retinol uptake STRA6 OS=Homo sapiens OX=9606 GN=STRA6 PE=1 SV=1	STRA6	73.502	1.099	0.764	0.563			1.059	2.003	0.495			1.466	0.58454
Q15404	Ras suppressor protein 1 OS=Homo sapiens OX=9606 GN=RSU1 PE=1 SV=3	RSU1	31.54	0.54	0.804	0.95	0.78	1.387	0.877	1.097	1.033	0.955	1.161	1.148	0.29376
Q96C19	EF-hand domain-containing protein D2 OS=Homo sapiens OX=9606 GN=EFHD2 PE=1 SV=1	EFHD2	26.697	0.8	0.728	1.093	0.821	1.99	1.324	0.696	0.726	1.159	0.617	0.832	0.53176
P43405	Tyrosine-protein kinase SYK OS=Homo sapiens OX=9606 GN=SYK PE=1 SV=1	SYK	72.065				0.586	0.39				1.297	1.162	2.519	0.046536
O60635	Tetraspanin-1 OS=Homo sapiens OX=9606 GN=TSPAN1 PE=1 SV=2	TSPAN1	26.301		0.348	2.14				0.284	0.339			0.25	0.37882
Q99747	Gamma-soluble NSF attachment protein OS=Homo sapiens OX=9606 GN=NAPG PE=1 SV=1	NAPG	34.746	1.09	0.973	1.11	1.242	1.819	1.402	1.347	1.01	1.271	1.017	0.97	0.90906
Q9NQR4	Omega-amidase NIT2 OS=Homo sapiens OX=9606 GN=NIT2 PE=1 SV=1	NIT2	30.608	1.468	0.746	1.012	0.626	1.15	0.971	1.087	1.016	0.923	1.342	1.067	0.55474
Q8WTV0	Scavenger receptor class B member 1 OS=Homo sapiens OX=9606 GN=SCARB1 PE=1 SV=1	SCARB1	60.877	0.751	0.77	1.022	1.981	1.917	1.22	0.927	1.174	1.775	1.31	0.995	0.79524
P12429	Annexin A3 OS=Homo sapiens OX=9606 GN=ANXA3 PE=1 SV=3	ANXA3	36.375	0.485	1.218	0.756	4.501	0.549	1.336	0.683	0.568	1.498	1.309	0.718	0.97168
O43781	Dual specificity tyrosine-phosphorylation-regulated kinase 3 OS=Homo sapiens OX=9606 GN=DYRK3 PE=1 SV=3	DYRK3	65.713	2.349	1.862	1.025			0.657	1.267	0.69			0.499	0.102764
Q8NCM8	Cytoplasmic dynein 2 heavy chain 1 OS=Homo sapiens OX=9606 GN=DYNC2H1 PE=1 SV=4	DYNC2H1	492.62	1.181	1.668	0.559			0.405	0.812	0.668			0.553	0.23372
P07686	Beta-hexosaminidase subunit beta OS=Homo sapiens OX=9606 GN=HEXB PE=1 SV=3	HEXB	63.111				1.055	0.74				0.768	1.673	1.36	0.61924
P54707	Potassium-transporting ATPase alpha chain 2 OS=Homo sapiens OX=9606 GN=ATP12A PE=1 SV=3	ATP12A	115.51	3.898	0.997	2.063	0.949	0.531	1.323	0.663	0.766	1.268	1.366	0.638	0.52858
Q15286	Ras-related protein Rab-35 OS=Homo sapiens OX=9606 GN=RAB35 PE=1 SV=1	RAB35	23.025	1.429	0.713	1.499	1.065	1.611	1.19	1.124	0.657	0.612	0.764	0.688	0.10592
P07203	Glutathione peroxidase 1 OS=Homo sapiens OX=9606 GN=GPX1 PE=1 SV=4	GPX1	22.088				0.942	1.381				1.061	0.858	0.826	0.50028
Q687X5	Metalloreductase STEAP4 OS=Homo sapiens OX=9606 GN=STEAP4 PE=1 SV=1	STEAP4	51.981	1.256	1.948	0.98	1.764	0.995	2.775	1.414	0.843	0.853	0.391	0.904	0.47072
Q9UK41	Vacuolar protein sorting-associated protein 28 homolog OS=Homo sapiens OX=9606 GN=VPS28 PE=1 SV=1	VPS28	25.425	1.15	1.332	1.433	0.804	0.972	1.023	1.448	1.066	1.16	1.039	1.008	0.8703
Q9P2M7	Cingulin OS=Homo sapiens OX=9606 GN=CGN PE=1 SV=2	CGN	136.38				0.799	1.877				1.851	0.787	0.986	0.98298
P63267	"Actin, gamma-enteric smooth muscle OS=Homo sapiens OX=9606 GN=ACTG2 PE=1 SV=1"	ACTG2	41.876	0.907	2.191	3.6			1.057	0.471	0.573			0.314	0.08472
P50053	Ketohexokinase OS=Homo sapiens OX=9606 GN=KHK PE=1 SV=2	KHK	32.523	0.885	0.68	1.004	1.04	0.856	0.732	1.315	0.96	0.901	1.22	1.148	0.3559
Q5VTE0	Putative elongation factor 1-alpha-like 3 OS=Homo sapiens OX=9606 GN=EEF1A1P5 PE=5 SV=1	EEF1A1P5	50.184	1.744	1.009	1.102	0.52	0.66	0.944	0.879	0.888	1.1	1.235	1.002	0.73016
O14494	Phospholipid phosphatase 1 OS=Homo sapiens OX=9606 GN=PLPP1 PE=1 SV=1	PLPP1	32.156	0.689	0.624	0.378	0.355	0.28	1.355	2.806	0.77	1.46	1.041	3.195	0.0035595
O43747	AP-1 complex subunit gamma-1 OS=Homo sapiens OX=9606 GN=AP1G1 PE=1 SV=5	AP1G1	91.35	2.472	2.207	2.393	1.503	1.045	1.238	0.708	0.809	0.743	1.23	0.491	0.0101595
P61421	V-type proton ATPase subunit d 1 OS=Homo sapiens OX=9606 GN=ATP6V0D1 PE=1 SV=1	ATP6V0D1	40.329	1.866	0.682	1.061	0.893	0.743	0.739	1.574	0.904	0.584	0.946	0.905	0.7304
P80294	Metallothionein-1H OS=Homo sapiens OX=9606 GN=MT1H PE=1 SV=1	MT1H	6.0393	3.103	3.357	1.813	3.293	1.643	0.667	1.557	1.561	1.086	0.4	0.399	0.0115819
Q9BYE9	Cadherin-related family member 2 OS=Homo sapiens OX=9606 GN=CDHR2 PE=1 SV=2	CDHR2	141.54	0.363	0.696	0.644	0.941	1.174	0.672	2.054	0.884	1.214	0.994	1.524	0.162025
P15311	Ezrin OS=Homo sapiens OX=9606 GN=EZR PE=1 SV=4	EZR	69.412	1.177	0.838	2.49	1.731	3.321	1.799	0.571	1.04	1.115	0.597	0.536	0.10544
O75936	Gamma-butyrobetaine dioxygenase OS=Homo sapiens OX=9606 GN=BBOX1 PE=1 SV=1	BBOX1	44.714	0.754	1.097	0.754	0.668	1.028	0.657	1.741	1.616	0.947	1.352	1.468	0.135318
P02649	Apolipoprotein E OS=Homo sapiens OX=9606 GN=APOE PE=1 SV=1	APOE	36.154	0.8	0.757	0.53	0.514	0.725	0.461	0.992	1.127	1.156	1.157	1.471	0.118639
Q7Z7D3	V-set domain-containing T-cell activation inhibitor 1 OS=Homo sapiens OX=9606 GN=VTCN1 PE=1 SV=1	VTCN1	30.878	0.462	1.229	1.318	0.593	0.998	0.582	1.675	1.891	1.037	0.987	1.342	0.3547
O00194	Ras-related protein Rab-27B OS=Homo sapiens OX=9606 GN=RAB27B PE=1 SV=4	RAB27B	24.608	1.037	0.875	1.077	1.742	2.302	1.319	1.375	0.926	0.903	0.307	0.687	0.22768
P47895	Aldehyde dehydrogenase family 1 member A3 OS=Homo sapiens OX=9606 GN=ALDH1A3 PE=1 SV=2	ALDH1A3	56.108	0.803	1.363	0.991	1.139	0.803	1.254	1.627	0.996	0.719	0.302	0.961	0.6139
P43487	Ran-specific GTPase-activating protein OS=Homo sapiens OX=9606 GN=RANBP1 PE=1 SV=1	RANBP1	23.31	1.96	0.919	1.211			2.29	0.742	0.662			0.903	0.652
P14550	Aldo-keto reductase family 1 member A1 OS=Homo sapiens OX=9606 GN=AKR1A1 PE=1 SV=3	AKR1A1	36.573	0.808	0.759	0.791	0.875	1.019	0.648	0.977	1.097	0.716	1.483	1.157	0.5187
P09972	Fructose-bisphosphate aldolase C OS=Homo sapiens OX=9606 GN=ALDOC PE=1 SV=2	ALDOC	39.455	1.317	5.063	1.085			1.009	1.14	1.125			0.439	0.35914
P07305	Histone H1.0 OS=Homo sapiens OX=9606 GN=H1-0 PE=1 SV=3	H1-0	20.863	1.857	1.785	0.898	0.557	0.917	0.663	0.344	2.594	0.761	1.948	1.049	0.8065
Q92734	Protein TFG OS=Homo sapiens OX=9606 GN=TFG PE=1 SV=2	TFG	43.447	1.21	0.42	0.832	0.378	1.066	0.586	1.067	0.7	0.803	1.745	1.255	0.42698
Q6UW60	Proprotein convertase subtilisin/kexin type 4 OS=Homo sapiens OX=9606 GN=PCSK4 PE=1 SV=2	PCSK4	82.794				0.297	0.193				1.981	1.353	6.804	0.021677
P34913	Bifunctional epoxide hydrolase 2 OS=Homo sapiens OX=9606 GN=EPHX2 PE=1 SV=2	EPHX2	62.615	1.412	0.324	0.725	0.672	0.231	1.473	1.73	1.114	1.321	0.99	1.97	0.062615
Q14699	Raftlin OS=Homo sapiens OX=9606 GN=RFTN1 PE=1 SV=4	RFTN1	63.145	0.925	0.613	0.741			0.942	0.61	0.317			0.82	0.45626
P46940	Ras GTPase-activating-like protein IQGAP1 OS=Homo sapiens OX=9606 GN=IQGAP1 PE=1 SV=1	IQGAP1	189.25	1.178	1.347	1.56	1.123	1.25	1.271	0.947	1.1	1.114	1.045	0.848	0.06158
Q9H0D6	5'-3' exoribonuclease 2 OS=Homo sapiens OX=9606 GN=XRN2 PE=1 SV=1	XRN2	108.58				0.894	2.355				1.095	0.512	0.495	0.39498
P25789	Proteasome subunit alpha type-4 OS=Homo sapiens OX=9606 GN=PSMA4 PE=1 SV=1	PSMA4	29.483	1.032	1.499	0.698	1.395	0.721	4.505	0.89	0.977	1.054	0.933	1.564	0.48862
P06744	Glucose-6-phosphate isomerase OS=Homo sapiens OX=9606 GN=GPI PE=1 SV=4	GPI	63.146	0.83	1.305	0.635	1.051	0.823	1.252	1.279	2.24	0.976	1.288	1.515	0.057902
P78369	Claudin-10 OS=Homo sapiens OX=9606 GN=CLDN10 PE=1 SV=2	CLDN10	24.488	2.01	0.291	1.185	0.202	0.322	0.721	0.791	1.735	1.483	1.169	1.471	0.1655
P27487	Dipeptidyl peptidase 4 OS=Homo sapiens OX=9606 GN=DPP4 PE=1 SV=2	DPP4	88.278	1.168	0.913	0.967	0.527	0.789	1.035	1.34	1.162	1.121	1.532	1.418	0.038337
P25788	Proteasome subunit alpha type-3 OS=Homo sapiens OX=9606 GN=PSMA3 PE=1 SV=2	PSMA3	28.433	1.303	1.833	0.463	1.46	0.616	2.563	1.329	1.966	1.28	1.002	1.434	0.20652
P14625	Endoplasmin OS=Homo sapiens OX=9606 GN=HSP90B1 PE=1 SV=1	HSP90B1	92.468	1.059	1.386	0.805			0.53	0.834	0.836			0.677	0.150276
Q9UGI8	Testin OS=Homo sapiens OX=9606 GN=TES PE=1 SV=1	TES	47.996	0.913	1.738	2.319			0.877	0.808	0.452			0.43	0.078118
Q8WVM0	"Dimethyladenosine transferase 1, mitochondrial OS=Homo sapiens OX=9606 GN=TFB1M PE=1 SV=1"	TFB1M	39.542				15.474	1.919					1.426	0.164
Q6ZSS7	Major facilitator superfamily domain-containing protein 6 OS=Homo sapiens OX=9606 GN=MFSD6 PE=1 SV=2	MFSD6	88.087	1.528	1.948	0.973	1.811	1.1	0.622	1.37	1.108	1.025	0.592	0.641	0.063535
Q9UJ68	Mitochondrial peptide methionine sulfoxide reductase OS=Homo sapiens OX=9606 GN=MSRA PE=1 SV=1	MSRA	26.132	0.889	1.546	1.239	1.185	1.175	0.894	1.24	1.02	1.284	1.566	0.995	0.9505
Q8NE01	Metal transporter CNNM3 OS=Homo sapiens OX=9606 GN=CNNM3 PE=1 SV=1	CNNM3	76.118	0.952	1.792	0.733			0.67	1.121	0.899			0.774	0.53674
Q8TEW8	Partitioning defective 3 homolog B OS=Homo sapiens OX=9606 GN=PARD3B PE=1 SV=2	PARD3B	132.49	0.856	0.655	0.821			1.118	0.853	1.308			1.406	0.09108
Q8N960	Centrosomal protein of 120 kDa OS=Homo sapiens OX=9606 GN=CEP120 PE=1 SV=2	CEP120	112.64				1.793	0.588				0.272	4.093	1.833	0.98686
P61160	Actin-related protein 2 OS=Homo sapiens OX=9606 GN=ACTR2 PE=1 SV=1	ACTR2	44.76	0.988	0.611	0.837	1.089	0.997	0.613	0.768	1.965	0.927	1.338	1.241	0.53976
P54578	Ubiquitin carboxyl-terminal hydrolase 14 OS=Homo sapiens OX=9606 GN=USP14 PE=1 SV=3	USP14	56.068	0.967	4.037	0.743	0.712	0.653	1.964	1.562	1.541	0.853	0.55	0.91	0.81572
P08603	Complement factor H OS=Homo sapiens OX=9606 GN=CFH PE=1 SV=4	CFH	139.09	0.87	1.262	0.586	0.612	0.311	0.798	0.394	6.021	0.983	1.741	2.729	0.23708
Q7Z7M0	Multiple epidermal growth factor-like domains protein 8 OS=Homo sapiens OX=9606 GN=MEGF8 PE=1 SV=2	MEGF8	303.1	3.112	1.983	1.403	0.862	0.5	0.527	1.082	1.252	1.277	0.824	0.631	0.39776
Q8N3R9	MAGUK p55 subfamily member 5 OS=Homo sapiens OX=9606 GN=MPP5 PE=1 SV=3	MPP5	77.293	1.08	1.292	1.083	0.91	1.487	1.058	1.023	0.857	1.002	1.141	0.868	0.2105
P62857	40S ribosomal protein S28 OS=Homo sapiens OX=9606 GN=RPS28 PE=1 SV=1	RPS28	7.8409	0.775	1.975	0.602			0.604	0.365	0.945			0.571	0.3363
Q15833	Syntaxin-binding protein 2 OS=Homo sapiens OX=9606 GN=STXBP2 PE=1 SV=2	STXBP2	66.452	1.201	1.347	1.42	1.151	1.784	1.159	1.179	1.019	0.8	1.187	0.774	0.045717
P16422	Epithelial cell adhesion molecule OS=Homo sapiens OX=9606 GN=EPCAM PE=1 SV=2	EPCAM	34.932	0.95	2.074	0.903	2.735	1.121	0.804	2.48	1.354	1.115	1.37	0.915	0.85128
P02786	Transferrin receptor protein 1 OS=Homo sapiens OX=9606 GN=TFRC PE=1 SV=2	TFRC	84.87	1.425	1.471	0.48			0.599	1.315	2.486			1.303	0.70826
P0C0L4	Complement C4-A OS=Homo sapiens OX=9606 GN=C4A PE=1 SV=2	C4A	192.78				0.906	0.654				0.83	3.301	2.648	0.39324
Q92482	Aquaporin-3 OS=Homo sapiens OX=9606 GN=AQP3 PE=2 SV=2	AQP3	31.543				0.932	0.614				0.615	0.554	0.756	0.35134
Q9Y597	BTB/POZ domain-containing protein KCTD3 OS=Homo sapiens OX=9606 GN=KCTD3 PE=1 SV=2	KCTD3	88.983	0.664	0.739	2.931	0.87	4.619	1.711	0.994	0.8	1.019	0.729	0.535	0.43486
P24821	Tenascin OS=Homo sapiens OX=9606 GN=TNC PE=1 SV=3	TNC	240.85	1.146	1.132	0.814			0.683	1.254	1.061			0.97	0.82578
Q9UGK3	Signal-transducing adaptor protein 2 OS=Homo sapiens OX=9606 GN=STAP2 PE=1 SV=2	STAP2	44.893	0.962	0.95	0.8			1.128	1.012	1.205			1.233	0.054581
Q8N9U0	Tandem C2 domains nuclear protein OS=Homo sapiens OX=9606 GN=TC2N PE=1 SV=2	TC2N	55.284	0.823	1.791	1.195			0.388	0.447	0.472			0.343	0.0116037
P01112	GTPase HRas OS=Homo sapiens OX=9606 GN=HRAS PE=1 SV=1	HRAS	21.298	1.823	1.093	1.394			0.713	0.942	0.741			0.556	0.028797
O95865	"N(G),N(G)-dimethylarginine dimethylaminohydrolase 2 OS=Homo sapiens OX=9606 GN=DDAH2 PE=1 SV=1"	DDAH2	29.644	0.95	1.271	1.279			0.784	0.758	2.679			1.206	0.98218
Q9HC38	Glyoxalase domain-containing protein 4 OS=Homo sapiens OX=9606 GN=GLOD4 PE=1 SV=1	GLOD4	34.793	1.23	1.264	0.869	0.935	1.06	1.275	1.862	1.013	1.046	1.034	1.163	0.36016
Q9BYB0	SH3 and multiple ankyrin repeat domains protein 3 OS=Homo sapiens OX=9606 GN=SHANK3 PE=1 SV=3	SHANK3	184.67	3.356	1.958	2.332			0.706	0.563	0.407			0.219	0.0025364
Q8TDD5	Mucolipin-3 OS=Homo sapiens OX=9606 GN=MCOLN3 PE=1 SV=1	MCOLN3	64.247	0.861	0.902	0.606			0.612	1.15	1.322			1.302	0.44456
Q15043	Zinc transporter ZIP14 OS=Homo sapiens OX=9606 GN=SLC39A14 PE=1 SV=3	SLC39A14	54.212	0.305	0.913	0.54			0.713	2.837	0.948			2.559	0.182476
Q9BZF9	Uveal autoantigen with coiled-coil domains and ankyrin repeats OS=Homo sapiens OX=9606 GN=UACA PE=1 SV=2	UACA	162.5	1.158	0.642	0.362			2.517	0.829	1.534			2.257	0.150321
A2NJV5	Immunoglobulin kappa variable 2-29 OS=Homo sapiens OX=9606 GN=IGKV2-29 PE=3 SV=2	IGKV2-29	13.085				0.77	1.755				0.906	0.936	0.73	0.6289
P15104	Glutamine synthetase OS=Homo sapiens OX=9606 GN=GLUL PE=1 SV=4	GLUL	42.064	0.48	1.661	0.357			1.139	0.443	1.993			1.431	0.54904
P05413	"Fatty acid-binding protein, heart OS=Homo sapiens OX=9606 GN=FABP3 PE=1 SV=4"	FABP3	14.858	2.413	1.102	1.4	0.975	0.682	0.764	1.407	1.049	0.937	1.524	0.864	0.73552
P78356	Phosphatidylinositol 5-phosphate 4-kinase type-2 beta OS=Homo sapiens OX=9606 GN=PIP4K2B PE=1 SV=1	PIP4K2B	47.377	1.59	0.501	0.841	0.926	0.824	0.918	1.306	0.862	0.711	1.048	1.035	0.70648
Q9NRV9	Heme-binding protein 1 OS=Homo sapiens OX=9606 GN=HEBP1 PE=1 SV=1	HEBP1	21.097	0.919	2.36	1.209	1.954	2.297	0.626	0.839	1.088	1.123	0.461	0.473	0.0194838
Q8N6Q3	CD177 antigen OS=Homo sapiens OX=9606 GN=CD177 PE=1 SV=2	CD177	46.363	0.993	0.483	0.893	2.076	0.589	5.362	0.569	0.604	1.53	0.853	1.772	0.54764
P62873	Guanine nucleotide-binding protein G(I)/G(S)/G(T) subunit beta-1 OS=Homo sapiens OX=9606 GN=GNB1 PE=1 SV=3	GNB1	37.377	0.982	1.559	1.354	1.368	1.811	0.666	0.584	0.823	0.774	1.15	0.565	0.0053581
Q14008	Cytoskeleton-associated protein 5 OS=Homo sapiens OX=9606 GN=CKAP5 PE=1 SV=3	CKAP5	225.49	4.538	7.88	1.087			0.821	1.513	1.409			0.277	0.171384
Q9HBB8	Cadherin-related family member 5 OS=Homo sapiens OX=9606 GN=CDHR5 PE=1 SV=3	CDHR5	88.222	2.092	1.496	1.841	1.227	2.167	1.87	0.574	0.28	0.808	0.461	0.453	0.0186566
P02750	Leucine-rich alpha-2-glycoprotein OS=Homo sapiens OX=9606 GN=LRG1 PE=1 SV=2	LRG1	38.177	0.827	2.458	0.585	1.224	0.816	0.837	1.384	0.559	0.953	0.67	0.745	0.48864
P55290	Cadherin-13 OS=Homo sapiens OX=9606 GN=CDH13 PE=1 SV=1	CDH13	78.286	0.931	1.047	0.759	0.946	0.971	0.348	0.948	0.674	1.001	0.697	0.788	0.20562
Q16348	Solute carrier family 15 member 2 OS=Homo sapiens OX=9606 GN=SLC15A2 PE=1 SV=2	SLC15A2	81.783	1.281	1.28	1.523	1.412	3.46	1.232	0.987	1.085	0.823	0.811	0.551	0.033098
Q9H8W4	Pleckstrin homology domain-containing family F member 2 OS=Homo sapiens OX=9606 GN=PLEKHF2 PE=1 SV=1	PLEKHF2	27.797	1.419	0.995	1.341			1.641	0.94	0.514			0.824	0.45706
P51151	Ras-related protein Rab-9A OS=Homo sapiens OX=9606 GN=RAB9A PE=1 SV=1	RAB9A	22.837	0.728	1.157	0.845	0.938	1.763	0.841	1.187	1.485	1.333	1.981	1.257	0.28086
Q9Y2T3	Guanine deaminase OS=Homo sapiens OX=9606 GN=GDA PE=1 SV=1	GDA	51.002	0.949	0.655	0.85	0.901	0.998	0.687	1.715	0.82	1.044	1.03	1.217	0.3858
P01033	Metalloproteinase inhibitor 1 OS=Homo sapiens OX=9606 GN=TIMP1 PE=1 SV=1	TIMP1	23.171	0.816	0.701	0.45	0.839	0.638	1.212	1.207	0.667	1.941	0.683	1.658	0.087664
P05090	Apolipoprotein D OS=Homo sapiens OX=9606 GN=APOD PE=1 SV=1	APOD	21.275	1.033	0.899	1.392	0.95	0.796	2.26	0.768	0.684	1.621	0.662	1.182	0.84878
Q14258	E3 ubiquitin/ISG15 ligase TRIM25 OS=Homo sapiens OX=9606 GN=TRIM25 PE=1 SV=2	TRIM25	70.973	0.862	17.808	0.576			0.386	0.764	0.71			0.097	0.32168
Q15036	Sorting nexin-17 OS=Homo sapiens OX=9606 GN=SNX17 PE=1 SV=1	SNX17	52.901	0.945	0.42	1.104			0.67	0.906	0.801			0.963	0.91688
Q6ZVM7	TOM1-like protein 2 OS=Homo sapiens OX=9606 GN=TOM1L2 PE=1 SV=1	TOM1L2	55.556	1.956	0.859	1.135	0.848	0.949	0.816	1.566	1.047	1.118	0.945	0.956	0.933
Q9NWQ8	Phosphoprotein associated with glycosphingolipid-enriched microdomains 1 OS=Homo sapiens OX=9606 GN=PAG1 PE=1 SV=2	PAG1	46.98	0.778	1.241	1.461	0.952	0.862	1.485	0.844	0.677	0.785	1.101	0.924	0.6287
Q92485	Acid sphingomyelinase-like phosphodiesterase 3b OS=Homo sapiens OX=9606 GN=SMPDL3B PE=1 SV=2	SMPDL3B	50.813	3.288	0.766	2.591	0.884	1.415	1.056	0.929	0.7	0.918	1.274	0.545	0.164819
P01701	Immunoglobulin lambda variable 1-51 OS=Homo sapiens OX=9606 GN=IGLV1-51 PE=1 SV=2	IGLV1-51	12.249	0.514	0.51	0.505	0.375	0.49	7.849	0.761	1.804	1.397	1.129	5.405	0.031561
Q9BSA4	Protein tweety homolog 2 OS=Homo sapiens OX=9606 GN=TTYH2 PE=1 SV=3	TTYH2	58.772	1.255	1.992	1.395			0.893	0.98	1.96			0.826	0.45274
Q13561	Dynactin subunit 2 OS=Homo sapiens OX=9606 GN=DCTN2 PE=1 SV=4	DCTN2	44.23	2.331	3.421	1.12			1.128	1.153	1.19			0.505	0.21674
Q96N67	Dedicator of cytokinesis protein 7 OS=Homo sapiens OX=9606 GN=DOCK7 PE=1 SV=4	DOCK7	242.56	0.963	1.889	0.926			0.534	0.848	0.886			0.6	0.16566
O75674	TOM1-like protein 1 OS=Homo sapiens OX=9606 GN=TOM1L1 PE=1 SV=2	TOM1L1	52.988	1.486	0.654	0.96	0.802	0.899	0.694	1.099	1.006	0.903	1.239	1.029	0.77838
P62834	Ras-related protein Rap-1A OS=Homo sapiens OX=9606 GN=RAP1A PE=1 SV=1	RAP1A	20.987	0.554	1.465	1.526	0.34	0.496	0.99	0.914	1.096	1.151	1.087	1.196	0.30886
Q99653	Calcineurin B homologous protein 1 OS=Homo sapiens OX=9606 GN=CHP1 PE=1 SV=3	CHP1	22.456	1.974	1.579	1.948			1.878	0.723	0.968			0.649	0.155043
Q9Y226	Solute carrier family 22 member 13 OS=Homo sapiens OX=9606 GN=SLC22A13 PE=2 SV=2	SLC22A13	60.861	0.82	0.853	0.968	1.946	2.679	0.722	1.98	0.817	1.138	0.726	0.741	0.42382
P26012	Integrin beta-8 OS=Homo sapiens OX=9606 GN=ITGB8 PE=1 SV=1	ITGB8	85.631	0.991	0.96	0.689			1.698	1.428	1.63			1.802	0.0093154
P22059	Oxysterol-binding protein 1 OS=Homo sapiens OX=9606 GN=OSBP PE=1 SV=1	OSBP	89.42	1.438	2.4	1.037	1.322	1.263	1.178	1.716	0.999	0.954	1.118	0.8	0.2756
O15427	Monocarboxylate transporter 4 OS=Homo sapiens OX=9606 GN=SLC16A3 PE=1 SV=1	SLC16A3	49.469	0.574	1.552	0.628	1.765	0.232	4.989	0.891	1.197	1.48	1.417	2.099	0.13924
P19397	Leukocyte surface antigen CD53 OS=Homo sapiens OX=9606 GN=CD53 PE=1 SV=1	CD53	24.341				3.434	0.709				0.199	0.28	0.116	0.144157
Q9GZM5	Protein YIPF3 OS=Homo sapiens OX=9606 GN=YIPF3 PE=1 SV=1	YIPF3	38.247	0.667	0.652	0.828	0.436	0.644	0.403	1.827	1.205	0.662	0.704	1.488	0.34506
P09525	Annexin A4 OS=Homo sapiens OX=9606 GN=ANXA4 PE=1 SV=4	ANXA4	35.882	1.544	1.192	1.862	1.03	0.878	1.69	0.805	0.654	1.4	1.283	0.896	0.57034
P54619	5'-AMP-activated protein kinase subunit gamma-1 OS=Homo sapiens OX=9606 GN=PRKAG1 PE=1 SV=1	PRKAG1	37.579	1.367	0.648	0.929			0.679	1.68	0.725			1.048	0.99658
P48304	Lithostathine-1-beta OS=Homo sapiens OX=9606 GN=REG1B PE=1 SV=1	REG1B	18.665				1.07	0.832				0.735	0.341	0.566	0.25734
Q99962	Endophilin-A1 OS=Homo sapiens OX=9606 GN=SH3GL2 PE=1 SV=1	SH3GL2	39.962				0.889	1.263				0.654	1.457	0.981	0.86848
P35555	Fibrillin-1 OS=Homo sapiens OX=9606 GN=FBN1 PE=1 SV=4	FBN1	312.3	1.002	0.664	0.732	1.258	0.791	1.443	1.068	0.723	0.539	0.491	0.959	0.68316
Q9Y5Z4	Heme-binding protein 2 OS=Homo sapiens OX=9606 GN=HEBP2 PE=1 SV=1	HEBP2	22.875	0.571	0.941	0.978	0.879	1.062	0.925	1.709	0.772	0.945	0.679	1.135	0.63942
Q15493	Regucalcin OS=Homo sapiens OX=9606 GN=RGN PE=1 SV=1	RGN	33.252	1.059	1.202	1.451			0.982	1.439	0.596			0.813	0.38896
Q6P1N0	Coiled-coil and C2 domain-containing protein 1A OS=Homo sapiens OX=9606 GN=CC2D1A PE=1 SV=1	CC2D1A	104.06	1.216	1.158	0.878	0.996	1.007	0.989	1.14	1.26	1.062	1.038	1.045	0.53356
P11597	Cholesteryl ester transfer protein OS=Homo sapiens OX=9606 GN=CETP PE=1 SV=2	CETP	54.756				0.38	0.228				0.761	0.428	1.956	0.22742
P28068	"HLA class II histocompatibility antigen, DM beta chain OS=Homo sapiens OX=9606 GN=HLA-DMB PE=1 SV=1"	HLA-DMB	28.943	0.253	1.338	0.54			0.994	1.412	1.205			1.695	0.20622
Q96F07	Cytoplasmic FMR1-interacting protein 2 OS=Homo sapiens OX=9606 GN=CYFIP2 PE=1 SV=2	CYFIP2	148.4	0.622	0.885	0.418			0.862	1.005	0.685			1.326	0.2646
P41181	Aquaporin-2 OS=Homo sapiens OX=9606 GN=AQP2 PE=1 SV=1	AQP2	28.837	0.701	0.52	0.495			0.62	1.007	1.538			1.844	0.121336
Q13596	Sorting nexin-1 OS=Homo sapiens OX=9606 GN=SNX1 PE=1 SV=3	SNX1	59.069	1.105	3.211	0.544	0.724	0.627	0.914	1.623	0.957	0.869	0.94	0.854	0.87346
Q9NRD8	Dual oxidase 2 OS=Homo sapiens OX=9606 GN=DUOX2 PE=1 SV=2	DUOX2	175.36	0.413	0.635	0.403	1.848	4.059	1.243	0.268	0.717	0.496	1.167	0.529	0.53364
P48509	CD151 antigen OS=Homo sapiens OX=9606 GN=CD151 PE=1 SV=3	CD151	28.295	1.379	0.478	0.621	1.134	0.537	1.495	1.338	0.52	1.078	0.916	1.289	0.343
P19827	Inter-alpha-trypsin inhibitor heavy chain H1 OS=Homo sapiens OX=9606 GN=ITIH1 PE=1 SV=3	ITIH1	101.39	1.122	1.44	1.042			0.555	0.316	5.242			1.696	0.83706
Q14019	Coactosin-like protein OS=Homo sapiens OX=9606 GN=COTL1 PE=1 SV=3	COTL1	15.945	1.778	1.236	0.943	1.03	1.28	1.746	1.862	1.119	0.962	0.922	1.055	0.86156
A0A0C4DH72	Immunoglobulin kappa variable 1-6 OS=Homo sapiens OX=9606 GN=IGKV1-6 PE=3 SV=1	IGKV1-6	12.697				0.747	0.366				1.817	0.851	2.397	0.23804
Q96BW5	Phosphotriesterase-related protein OS=Homo sapiens OX=9606 GN=PTER PE=1 SV=1	PTER	39.017	1.538	0.98	1.063			0.57	1.024	1.769			0.939	0.70124
P48426	Phosphatidylinositol 5-phosphate 4-kinase type-2 alpha OS=Homo sapiens OX=9606 GN=PIP4K2A PE=1 SV=2	PIP4K2A	46.224	1.46	0.743	1.273	1.174	0.938	0.801	1.16	1.104	0.557	0.533	0.744	0.151103
Q96QT4	Transient receptor potential cation channel subfamily M member 7 OS=Homo sapiens OX=9606 GN=TRPM7 PE=1 SV=1	TRPM7	212.69				0.706	0.26				1.105	0.3	1.454	0.7534
Q8ND76	Cyclin-Y OS=Homo sapiens OX=9606 GN=CCNY PE=1 SV=2	CCNY	39.336	1.388	1.272	0.853	0.612	0.477	1.643	1.415	1.316	1.119	1.223	1.459	0.104803
P01706	Immunoglobulin lambda variable 2-11 OS=Homo sapiens OX=9606 GN=IGLV2-11 PE=1 SV=2	IGLV2-11	12.644	0.633	0.683	0.71	1.349	0.677	3.367	0.543	2.748	1.656	1.315	2.376	0.069285
O15400	Syntaxin-7 OS=Homo sapiens OX=9606 GN=STX7 PE=1 SV=4	STX7	29.815	1.657	1.513	1.268	1.643	1.72	1.365	1.495	0.881	1.031	1.281	0.776	0.043484
Q9H477	Ribokinase OS=Homo sapiens OX=9606 GN=RBKS PE=1 SV=1	RBKS	34.143				2.074	2.199				1.084	0.306	0.325	0.174301
O76070	Gamma-synuclein OS=Homo sapiens OX=9606 GN=SNCG PE=1 SV=2	SNCG	13.331	0.984	0.994	1.316	0.865	2.516	2.125	0.429	1.163	1.344	0.701	0.863	0.55628
P31947	14-3-3 protein sigma OS=Homo sapiens OX=9606 GN=SFN PE=1 SV=1	SFN	27.774	1.186	1.048	1.066	1.076	2.574	1.935	0.494	1.149	2.595	0.397	0.945	0.57882
P04632	Calpain small subunit 1 OS=Homo sapiens OX=9606 GN=CAPNS1 PE=1 SV=1	CAPNS1	28.315	0.368	0.44	0.898	0.723	1.116	1.455	1.671	1.491	0.772	0.766	1.736	0.064397
P61086	Ubiquitin-conjugating enzyme E2 K OS=Homo sapiens OX=9606 GN=UBE2K PE=1 SV=3	UBE2K	22.406	0.735	0.818	0.611			0.344	0.724	0.602			0.772	0.2802
P19105	Myosin regulatory light chain 12A OS=Homo sapiens OX=9606 GN=MYL12A PE=1 SV=2	MYL12A	19.794	1.073	1.155	0.853	1.776	1.154	1.399	1.213	1.883	1.339	0.883	1.117	0.53194
Q3LXA3	Triokinase/FMN cyclase OS=Homo sapiens OX=9606 GN=TKFC PE=1 SV=2	TKFC	58.946	1.303	1.009	1.142	0.775	0.972	1.151	1.842	0.92	0.725	1.082	1.1	0.741
Q9NPH2	Inositol-3-phosphate synthase 1 OS=Homo sapiens OX=9606 GN=ISYNA1 PE=1 SV=1	ISYNA1	61.067	0.701	0.431	0.628			1.419	0.929	1.662			2.278	0.023137
P30043	Flavin reductase (NADPH) OS=Homo sapiens OX=9606 GN=BLVRB PE=1 SV=3	BLVRB	22.119	1.386	1.907	1.378	0.788	1.049	0.953	1.205	1.246	0.793	0.937	0.789	0.25816
Q5T601	Adhesion G-protein coupled receptor F1 OS=Homo sapiens OX=9606 GN=ADGRF1 PE=1 SV=2	ADGRF1	101.36	0.969	0.951	0.985	1.192	1.49	1.4	0.911	1.679	1.468	1.164	1.185	0.26392
Q9UHG3	Prenylcysteine oxidase 1 OS=Homo sapiens OX=9606 GN=PCYOX1 PE=1 SV=3	PCYOX1	56.639	0.529	0.683	0.774	0.905	0.732	0.697	0.554	0.609	2.415	1.465	1.584	0.37292
P00738	Haptoglobin OS=Homo sapiens OX=9606 GN=HP PE=1 SV=1	HP	45.205	0.362	0.421	0.231	0.624	0.478	0.512	0.187	2.806	0.315	4.69	4.022	0.32554
P78417	Glutathione S-transferase omega-1 OS=Homo sapiens OX=9606 GN=GSTO1 PE=1 SV=2	GSTO1	27.566	0.988	1.243	0.618	0.904	0.792	1.55	1.513	1.131	0.873	1.075	1.351	0.091824
O75844	CAAX prenyl protease 1 homolog OS=Homo sapiens OX=9606 GN=ZMPSTE24 PE=1 SV=2	ZMPSTE24	54.812	0.525	0.57	2.048			0.868	0.718	0.61			0.699	0.74266
P15529	Membrane cofactor protein OS=Homo sapiens OX=9606 GN=CD46 PE=1 SV=3	CD46	43.747	0.292	0.461	0.251	0.733	0.419	1.188	1.545	1.275	1.171	0.923	2.83	0.00068043
O14733	Dual specificity mitogen-activated protein kinase kinase 7 OS=Homo sapiens OX=9606 GN=MAP2K7 PE=1 SV=2	MAP2K7	47.484				0.546	0.694				0.739	0.98	1.386	0.22244
P08236	Beta-glucuronidase OS=Homo sapiens OX=9606 GN=GUSB PE=1 SV=2	GUSB	74.731	0.459	0.668	0.403			1.159	0.272	3.15			2.994	0.39342
Q6FHJ7	Secreted frizzled-related protein 4 OS=Homo sapiens OX=9606 GN=SFRP4 PE=1 SV=2	SFRP4	39.826	0.104	0.175	0.389
B2RUZ4	Small integral membrane protein 1 OS=Homo sapiens OX=9606 GN=SMIM1 PE=1 SV=1	SMIM1	8.749	0.495	1.158	1.263	0.367	0.626	0.17	2.789	0.979	0.347	0.998	1.351	0.9902
P07384	Calpain-1 catalytic subunit OS=Homo sapiens OX=9606 GN=CAPN1 PE=1 SV=1	CAPN1	81.889	0.642	0.52	0.863	1.033	1.415	0.947	1.023	1.061	1.032	1.067	1.147	0.32658
Q8N490	Probable hydrolase PNKD OS=Homo sapiens OX=9606 GN=PNKD PE=1 SV=2	PNKD	42.875	1.112	1.331	1.349	1.569	1.565	1.996	0.984	0.794	0.988	1.493	0.903	0.41994
Q14185	Dedicator of cytokinesis protein 1 OS=Homo sapiens OX=9606 GN=DOCK1 PE=1 SV=2	DOCK1	215.34	1.119	0.835	1.264			0.982	1.062	0.982			0.94	0.72474
Q96B97	SH3 domain-containing kinase-binding protein 1 OS=Homo sapiens OX=9606 GN=SH3KBP1 PE=1 SV=2	SH3KBP1	73.125	1.837	1.294	1.09			0.913	0.488	0.569			0.467	0.033325
A0A0C4DH35	Probable non-functional immunoglobulin heavy variable 3-35 OS=Homo sapiens OX=9606 GN=IGHV3-35 PE=5 SV=1	IGHV3-35	12.81	0.733	1.14	1.4	1.22	1.973	2.76	0.696	2.862	0.978	0.666	1.231	0.89766
Q9UN71	Protocadherin gamma-B4 OS=Homo sapiens OX=9606 GN=PCDHGB4 PE=2 SV=1	PCDHGB4	99.926				0.775	0.751				0.465	1.078	1.011	0.88816
O15484	Calpain-5 OS=Homo sapiens OX=9606 GN=CAPN5 PE=1 SV=2	CAPN5	73.168	1.231	1.009	2.938	1.225	3.892	0.949	0.836	1.051	1.018	0.712	0.444	0.074059
P50148	Guanine nucleotide-binding protein G(q) subunit alpha OS=Homo sapiens OX=9606 GN=GNAQ PE=1 SV=4	GNAQ	42.142	1.173	0.724	1.592	1.615	2.62	1.429	1.301	1.269	0.866	1.397	0.811	0.56272
P05106	Integrin beta-3 OS=Homo sapiens OX=9606 GN=ITGB3 PE=1 SV=2	ITGB3	87.057	1.152	1.758	0.563	1.843	2.369	1.036	1.679	0.519	0.863	0.76	0.632	0.21634
P08575	Receptor-type tyrosine-protein phosphatase C OS=Homo sapiens OX=9606 GN=PTPRC PE=1 SV=3	PTPRC	147.48	0.518	1.008	0.339	2.655	0.582	3.489	0.588	0.792	1.429	1.629	1.554	0.29634
P13671	Complement component C6 OS=Homo sapiens OX=9606 GN=C6 PE=1 SV=3	C6	104.79	0.753	1.306	0.544			1.184	0.538	2.893			1.773	0.49448
P07911	Uromodulin OS=Homo sapiens OX=9606 GN=UMOD PE=1 SV=1	UMOD	69.76	0.589	0.73	0.739	1.148	0.551	0.378	1.289	0.446	2.447	0.42	1.326	0.95858
Q1HG44	Dual oxidase maturation factor 2 OS=Homo sapiens OX=9606 GN=DUOXA2 PE=1 SV=2	DUOXA2	34.786				1.821	5.414				0.642	0.678	0.182	0.103602
P09668	Pro-cathepsin H OS=Homo sapiens OX=9606 GN=CTSH PE=1 SV=4	CTSH	37.393	1.101	1.045	1.331	2.435	1.173	1.264	1.25	0.853	1.712	3.138	1.16	0.71486
P59666	Neutrophil defensin 3 OS=Homo sapiens OX=9606 GN=DEFA3 PE=1 SV=1	DEFA3	10.245	0.216	0.239	0.123	9.539	1.269	8.182	0.277	0.599	1.438	0.661	0.98	0.58094
Q9TQE0	"HLA class II histocompatibility antigen, DRB1-9 beta chain OS=Homo sapiens OX=9606 GN=HLA-DRB1 PE=1 SV=1"	HLA-DRB1	29.826	0.59	1.787	1.499	2.64	0.465	0.3	0.276	0.148	1.512	2.625	0.696	0.28422
Q13188	Serine/threonine-protein kinase 3 OS=Homo sapiens OX=9606 GN=STK3 PE=1 SV=2	STK3	56.3	1.651	1.762	1.674			1.307	1.059	1.14			0.689	0.0043839
Q9Y2B5	VPS9 domain-containing protein 1 OS=Homo sapiens OX=9606 GN=VPS9D1 PE=1 SV=2	VPS9D1	68.955	1.168	1.08	1.133	0.601	0.717	0.69	1.059	0.991	0.984	0.824	0.968	0.95286
Q02413	Desmoglein-1 OS=Homo sapiens OX=9606 GN=DSG1 PE=1 SV=2	DSG1	113.75	1.015	3.382	0.934	1.681	1.455	1.314	0.844	0.848	0.547	0.852	0.52	0.063476
P40199	Carcinoembryonic antigen-related cell adhesion molecule 6 OS=Homo sapiens OX=9606 GN=CEACAM6 PE=1 SV=3	CEACAM6	37.194	0.458	0.689	1.209	0.783	1.399	0.962	0.967	1.259	0.942	0.96	1.122	0.42174
P78380	Oxidized low-density lipoprotein receptor 1 OS=Homo sapiens OX=9606 GN=OLR1 PE=1 SV=1	OLR1	30.959				1.11	0.251				1.118	0.917	1.495	0.47662
Q9Y2H0	Disks large-associated protein 4 OS=Homo sapiens OX=9606 GN=DLGAP4 PE=1 SV=3	DLGAP4	108.01	0.829	0.836	0.764			1.536	1.279	1.028			1.582	0.020261
O94903	Pyridoxal phosphate homeostasis protein OS=Homo sapiens OX=9606 GN=PLPBP PE=1 SV=1	PLPBP	30.344	1.245	0.989	0.892			0.748	1.225	0.922			0.926	0.6409
A0M8Q6	Immunoglobulin lambda constant 7 OS=Homo sapiens OX=9606 GN=IGLC7 PE=1 SV=3	IGLC7	11.253	1.347	6.492	7.066			1.808	0.429	0.394			0.177	0.072758
P58872	Rhomboid-related protein 3 OS=Homo sapiens OX=9606 GN=RHBDL3 PE=2 SV=1	RHBDL3	45.244	1.086	0.8	1.115			1.888	1.213	1.013			1.371	0.24434
P17600	Synapsin-1 OS=Homo sapiens OX=9606 GN=SYN1 PE=1 SV=3	SYN1	74.111				6.569	2.015				1.345	1.685	0.353	0.28006
Q15435	Protein phosphatase 1 regulatory subunit 7 OS=Homo sapiens OX=9606 GN=PPP1R7 PE=1 SV=1	PPP1R7	41.564	1.009	0.892	0.847			0.909	1.28	1.002			1.161	0.28304
Q10567	AP-1 complex subunit beta-1 OS=Homo sapiens OX=9606 GN=AP1B1 PE=1 SV=2	AP1B1	104.64	1.392	2.147	0.797	0.854	1.075	1.153	1.125	1.051	0.778	0.97	0.81	0.45936
Q13496	Myotubularin OS=Homo sapiens OX=9606 GN=MTM1 PE=1 SV=2	MTM1	69.931	0.889	0.717	1.294	1.161	1.142	1.898	1.554	0.765	0.659	0.985	1.126	0.80524
P54802	Alpha-N-acetylglucosaminidase OS=Homo sapiens OX=9606 GN=NAGLU PE=1 SV=2	NAGLU	82.265	0.845	0.538	0.93	0.435	0.356	0.836	1.986	1.355	2.188	1.08	2.399	0.0095211
P25398	40S ribosomal protein S12 OS=Homo sapiens OX=9606 GN=RPS12 PE=1 SV=3	RPS12	14.515	2.043	4.585	0.617			0.558	1.093	1.659			0.457	0.43072
A0A0B4J1Y9	Immunoglobulin heavy variable 3-72 OS=Homo sapiens OX=9606 GN=IGHV3-72 PE=3 SV=1	IGHV3-72	13.203				0.912	1.187				1.51	0.622	1.016	0.8921
A0A0C4DH29	Immunoglobulin heavy variable 1-3 OS=Homo sapiens OX=9606 GN=IGHV1-3 PE=3 SV=1	IGHV1-3	13.008	0.51	0.7	0.535			2.89	0.376	1.552			2.761	0.30078
E5RIL1	Uroplakin-3b-like protein 2 OS=Homo sapiens OX=9606 GN=UPK3BL2 PE=3 SV=2	UPK3BL2	28.385	0.852	0.894	1.326	0.446	0.983	0.854	1.112	0.978	0.421	0.814	0.928	0.79452
P20810	Calpastatin OS=Homo sapiens OX=9606 GN=CAST PE=1 SV=4	CAST	76.572	1.131	2.38	0.822	4.32	5.375	1.815	0.677	0.99	0.299	0.381	0.297	0.041958
Q96HL8	SH3 domain-containing YSC84-like protein 1 OS=Homo sapiens OX=9606 GN=SH3YL1 PE=1 SV=1	SH3YL1	37.148	0.929	0.684	0.264			1.009	1.379	1.034			1.823	0.141558
Q6UWR7	Glycerophosphocholine cholinephosphodiesterase ENPP6 OS=Homo sapiens OX=9606 GN=ENPP6 PE=1 SV=2	ENPP6	50.24	0.481	3.502	2.015	0.592	0.555	1.674	0.685	0.446	0.828	1.672	0.742	0.85372
Q8WW52	Protein FAM151A OS=Homo sapiens OX=9606 GN=FAM151A PE=2 SV=2	FAM151A	64.027	1.455	1.075	1.181	1.201	1.061	1.167	1.407	0.888	0.893	1.518	0.983	0.787
P61225	Ras-related protein Rap-2b OS=Homo sapiens OX=9606 GN=RAP2B PE=1 SV=1	RAP2B	20.504	1.136	1.352	1.175	1.3	1.923	1.418	0.514	0.273	0.199	0.567	0.431	0.039283
P63092	Guanine nucleotide-binding protein G(s) subunit alpha isoforms short OS=Homo sapiens OX=9606 GN=GNAS PE=1 SV=1	GNAS	45.664	1.255	0.557	1.566	1.013	1.505	1.094	0.992	0.976	0.709	0.84	0.782	0.36608
Q99615	DnaJ homolog subfamily C member 7 OS=Homo sapiens OX=9606 GN=DNAJC7 PE=1 SV=2	DNAJC7	56.44	1.934	1.068	1.599	1.66	2.705	1.445	1.049	1.03	0.961	0.349	0.539	0.046555
Q15283	Ras GTPase-activating protein 2 OS=Homo sapiens OX=9606 GN=RASA2 PE=1 SV=3	RASA2	96.613	1.385	2.343	2.673			0.722	0.509	0.501			0.271	0.0053378
Q96QE2	Proton myo-inositol cotransporter OS=Homo sapiens OX=9606 GN=SLC2A13 PE=1 SV=3	SLC2A13	70.37	0.901	0.696	0.867	1.325	0.822	0.976	1.341	0.918	2.36	1.025	1.436	0.156839
Q9Y233	"cAMP and cAMP-inhibited cGMP 3',5'-cyclic phosphodiesterase 10A OS=Homo sapiens OX=9606 GN=PDE10A PE=1 SV=1"	PDE10A	88.412	0.942	0.729	1.106			1.452	1.373	1.052			1.396	0.097118
P05156	Complement factor I OS=Homo sapiens OX=9606 GN=CFI PE=1 SV=2	CFI	65.75	0.665	0.782	0.383			0.668	0.81	2.323			2.077	0.2384
Q15185	Prostaglandin E synthase 3 OS=Homo sapiens OX=9606 GN=PTGES3 PE=1 SV=1	PTGES3	18.697				0.39	0.327				1.228	1.598	3.941	0.013176
Q03167	Transforming growth factor beta receptor type 3 OS=Homo sapiens OX=9606 GN=TGFBR3 PE=1 SV=3	TGFBR3	93.498				0.712	1.398				0.938	0.299	0.586	0.4407
Q92797	Symplekin OS=Homo sapiens OX=9606 GN=SYMPK PE=1 SV=2	SYMPK	141.15					0.578					8.978	15.533
P00352	Retinal dehydrogenase 1 OS=Homo sapiens OX=9606 GN=ALDH1A1 PE=1 SV=2	ALDH1A1	54.861	1.44	1.254	0.918			0.987	1.612	1.098			1.024	0.93446
O60291	E3 ubiquitin-protein ligase MGRN1 OS=Homo sapiens OX=9606 GN=MGRN1 PE=1 SV=2	MGRN1	60.752	1.966	1.791	2.182			1.239	1.14	1.042			0.576	0.00190448
P04406	Glyceraldehyde-3-phosphate dehydrogenase OS=Homo sapiens OX=9606 GN=GAPDH PE=1 SV=3	GAPDH	36.053	0.96	0.945	1.439	1.133	1.042	0.8	0.618	0.766	0.962	1.338	0.812	0.16448
O14975	Very long-chain acyl-CoA synthetase OS=Homo sapiens OX=9606 GN=SLC27A2 PE=1 SV=2	SLC27A2	70.311	1.031	1.238	0.8	1.048	1.93	1.539	1.758	0.998	1.007	1.716	1.161	0.42348
P04745	Alpha-amylase 1 OS=Homo sapiens OX=9606 GN=AMY1A PE=1 SV=2	AMY1A	57.767	1.081	1.468	0.52	0.975	0.502	0.964	2.977	1.109	0.439	0.427	1.301	0.85552
Q9UPT5	Exocyst complex component 7 OS=Homo sapiens OX=9606 GN=EXOC7 PE=1 SV=3	EXOC7	83.381	0.896	0.951	0.442			1.162	1.013	1.431			1.575	0.133482
Q92900	Regulator of nonsense transcripts 1 OS=Homo sapiens OX=9606 GN=UPF1 PE=1 SV=2	UPF1	124.34				3.659	2.967				0.221	0.234	0.069	0.00164375
O00754	Lysosomal alpha-mannosidase OS=Homo sapiens OX=9606 GN=MAN2B1 PE=1 SV=3	MAN2B1	113.74				0.866	0.705				1.329	1.394	1.733	0.034337
P11766	Alcohol dehydrogenase class-3 OS=Homo sapiens OX=9606 GN=ADH5 PE=1 SV=4	ADH5	39.724	1.033	1.123	0.806	0.594	0.888	0.848	0.937	0.927	0.355	1.073	0.932	0.6338
P07108	Acyl-CoA-binding protein OS=Homo sapiens OX=9606 GN=DBI PE=1 SV=2	DBI	10.044	0.958	1.472	1.079	2.414	2.395	1.325	0.489	0.397	2.514	0.486	0.626	0.13942
[truncated: 27 more rows]
